# Supplementary material for: The Cell Wall Proteome of Marchantia polymorpha Reveals Specificities Compared to Those of Flowering Plants
Source: Front Plant Sci. 2022 Jan 13;12:765846. doi: 10.3389/fpls.2021.765846 (PMC8792609; doi:10.3389/fpls.2021.765846)
Supplement: Supplementary file 6 [file Table_3.XLSX]

## Sheet: Supp. Table 3
Supplementary Table 3. MS data allowing the identification of the proteins purified by affinity chromatography on ConA.

## Sheet: parameters
Databases
contaminant_standard.fasta				JGI_M_polymorpha_20191025.fasta
Id :	contaminant_standard.fasta			Id :	NA
Source :	Uniprot (www.uniprot.org)			Source :	Joint Genome Initiative
Espèce(s) :	NA			Species	Marchantia Polymorpha
Version :	2			Version :	3.1 (20191025)
Entries	58			Entrées :	24674
Type	Protein			Type :	Protein
Sequence type	PROT			Sequence Type :	PROT
Website	uniprot			Site Web :	https://genome.jgi.doe.gov/portal/pages/dynamicOrganismDownload.jsf?organism=Phytozome#
Description :	See sheet "contaminants"
Parameters
Software	X!Tandempipeline C++ Piledriver (2015.04.01.1)
	http://www.thegpm.org/
Parameters:	QExactive_analysis_FDR_semi_V2_hydroxyproline.xml
Pipeline	0.4.22
Filters	Proteins : log (evalue) < -5
	Protins : minimun 2 peptides
	Peptides : evalue < 0.01 to validate a protein
Enzyme	cutting after Arg or Lys, except if followed by Pro
	1 miscleavage (up to 5 in refine mod)
	Semi-tryptic only allowed in refine mode
Modifications	Fixed
	Carbamidomethylation of Cys = +57.04
	Putative
	Oxidation of Met and Trp = +15.99
	Nter acetylation = +42.01
	Nter deamidation on Gln = -17.02
	Nter H2O loss on Gln = -18.01
	Deamidation of Asn and Gln = +0,98
	Hydroxylation on Pro = +15.99
Explanations
Sheet « X!TandemPipeline information »
The X!TandemPipeline parameters used for this analysis.
Sheet « groups »
Columns
	Groups	Number of proteins groups showing commn peptides
	Subgroups	Number of sub-groups of proteins identified with the same pool of peptides. They cannot be distinguished.
	Proteins	Number of grouped proteins.
	Peptides	Number of different peptides grouped in the whole experiment
	psm	Number of peptide hits identified from grouped peptides
	peptide/mass/sample	Number of unique combinations: grouped peptide sequences + modifications + sample
	prot FDR	FDR at the level of proteins
	pep FDR	FDR at the level of peptides
Sheet "proteins"
All the proteins identified by the analysis.
Columns
	Group ID	Group of proteins sharing common peptides
	Sub-group ID	Sub-groups of proteins identified with the same pool of peptides. They cannot be distinguished.
	Protein ID	Identifyer of protein in the sub-group
	Accession	Accession number of the identified protein
	Description	Description of the identified protein
	log(E value)	E-value of the protein, expressed in log
Statistical data representing the headcount present by chance in the database.
It is calculated by the product of the E-values of the unique peptides identified in the sample.
	Coverage	Percentage of sequence coverage
	MM	Molecular mass of the protein in kDa
	Spectra	Numer of spectra allowing the identificatin of the protein
	Size	Number of amino acids of the protein
	Specific	Number of specific spectra of the protein, compared to the other proteins of the same group
If there is only one sub-group, this number is replaced by '-'.
	Unique	Number of unique peptides (different sequences) allowing the identification of the protein
	Specific unique	Number of unique and specific peptides allowing the identification of the protein
	Theoretical number of tryptic peptides
		Number of possible tryptic peptides of the protein
	PAI	Protein Abondance Index
It represents the relative abundance of the protein. It is calculated by dividing the number of observed spectra by the number of expected peptides.
	emPAI	exponentially modified Protein Abundance Index (10^(PAI)-1)
	Sub-group proteins	Number of sub-groups in the group containing the protein
	number of MS samples	Number of samples in which the protein is identified
Sheet "peptides"
All the peptides present in the experiment are listed.
One line corresponds to one MS/MS spectrum allowing the identification of one or several proteins.
Columns
	Group ID	Number of the group of proteins sharing common peptides
	Peptide ID	identifyer of the peptide in the experiment
	Sequence	Sequence if the identified peptide
	Modifs	Modifications of the identified peptide
Example: M5:+15.99 means that the 5th Met exhibits a mass shift of 15.99 Da, corresponding to an oxidation (cf parameters above).
	Charge	Level of charge (z) of the presursor giving rise to the MS/MS spectrum
	MH+ theo	Monoisotopic mass of the identified peptide to which a proton is added (MH+)
	Number of subgroups	Number of sub-groups in which a given peptide is used.
	Subgroup ids	Identifyer of the sub-groups in which the peptide is used
	Number of spectra	Number of spectra allowing the identification of the peptide
Sheet « compar_spectra »
Comparison between the different samples of the same analysis.
One line corresponds to one sub-group of an identified protein.
This sheet gives the total number if spectra identified per protein et per sample.
Columns
	Group	Number of the group of proteins sharing common peptides
	Sub-group	Sub-group of proteins identified with the same pool of peptides. They cannot be distinguished.
	Top protein id	ID of the first protein of the sub-group if the sub-group contains several different proteins
	Accession	Accession number of the identified protein
	Description	Description of the first protein of the sub-group if the sub-group contains several different proteins
	Number of proteins	Number of proteins in the sub-group
	Name of a sample or of an injection
		Number of spectra identified in the sample
Sheet « compar_specific »
Comparison between the samples of a given analysis
One line corresponds to one sub-group of an identified protein.
This sheet gives the total number if specific spectra identified per protein et per sample.
Columns
	Groupe	Number of the group of proteins sharing common peptides
	Sub-group	Sub-group of proteins identified with the same pool of peptides. They cannot be distinguished.
	Top protein id	ID of the first protein of the sub-group if the sub-group contains several different proteins
	Accession	Accession number of the identified protein
	Description	Description of the first protein of the sub-group if the sub-group contains several different proteins
	Number of proteins	Number of proteins in the sub-group
	Name of a sample or of an injection
		Number of specific spectra identified in the sample
Sheet «samples »
Information regarding the analysis by mass spectrometry and the identification by X!Tandempipeline in all the samples.
Columns
	Sample ID	Sample identifyer
	Sample	Name of the sample
	MS run file	File generated by the mass spectrometer
	Identification engine	Algorithm for the identification
	Identification engine version	Version of the algorithm
	Identification result file	File generated after database query
	Identification fasta files	Database used for the identification
	X!Tandem parameters	Preset containing the X!Tandempipeline parameters for the query
	Total spectra assigned	Total number of spectra assigned per sample
	Total spectra used	Total number of spectra identified per sample
	Assignment percentage	Percentage of assignment
	Total unique assigned	Total number of unique peptide sequences assigned in a sample
	Total scans	Total number of scans per sample
	Total MS1	Total number of spectra at the MS1 level
	Total MS2	Total number of spectra at the MS2 level
	Total MS3	Total number of spectra at the MS3 level
	Annotation according to WallProtDB (http://www.polebio.lrsv.ups-tlse.fr/WallProtDB/)						Proposal of a protein name according to the prediction of functional domains or experimentally demonstrated function.
	Annotation using ProtAnnDB (http://www.polebio.lrsv.ups-tlse.fr/ProtAnnDB/)						Prediction of sub-cellular localization and of functional domains

## Sheet: X!TandemPipeline information
X!TandemPipeline version :
0.4.25
X!TandemPipeline filters :
Mode	combine
Maximum peptide Evalue	0.01
Minimum number of peptides per protein	2
Overall samples	FALSE
Maximum protein Evalue	1e-05
contaminant pattern	^conta\\
decoy pattern	.*reversed$
sheet definitions
groups	simple statistics on the current grouping experiment (numbers of groups, subgroups...)
proteins	list of proteins after the protein inference computation
peptides	list of peptides used by the grouping algorithm. Beware : peptides are intended as unique pairs of sequence+mass, given that Leucine and Isoleucine as the same mass, all Leucines are considered as Isoleucines
spectra	list of all validated and checked spectrum match. Only the best assigned peptide (best Evalue) is reported

## Sheet: contaminants
Contaminants
conta|A2A5Y0|A2A5Y0_MOUSE
conta|gi|159024207|gb|ABW87339.1|
conta|O76013|K1H6_HUMAN
conta|O95678|O95678_HUMAN
conta|P00761|TRYP_PIG
conta|P02533|K1CN_HUMAN
conta|P02535|K1C10_MOUSE
conta|P02538|K2C6A_HUMAN
conta|P02662|CAS1_BOVIN
conta|P02663|CAS2_BOVIN
conta|P02668|CASK_BOVIN
conta|P02768|ALBU_HUMAN
conta|P02769|ALBU_BOVIN
conta|P04040|CATA_HUMAN
conta|P04104|K2C1_MOUSE
conta|P04259|K2C6B_HUMAN
conta|P04264|K2C1_HUMAN
conta|P05787|K2C8_HUMAN
conta|P07744|K2C4_MOUSE
conta|P08729|K2C7_HUMAN
conta|P08730|K1C13_MOUSE
conta|P08779|K1C16_HUMAN
conta|P12035|K2C3_HUMAN
conta|P13645|K1CJ_HUMAN
conta|P13646|K1C13_HUMAN
conta|P13647|K2C5_HUMAN
conta|P35527|K1CI_HUMAN
conta|P35908|K22E_HUMAN
conta|P48666|K2C6C_HUMAN
conta|Q01546|K22O_HUMAN
conta|Q04695|K1C17_HUMAN
conta|Q0IIN1|Q0IIN1_HUMAN
conta|Q15323|K1H1_HUMAN
conta|Q3TTY5|K22E_MOUSE
conta|Q3UV17|Q3UV17_MOUSE
conta|Q61781|K1C14_MOUSE
conta|Q6IFX2|K1C42_MOUSE
conta|Q6IME9|Q6IME9_MOUSE
conta|Q80VP7|Q80VP7_MOUSE
conta|Q8BGZ7|Q8BGZ7_MOUSE
conta|Q922U2|K2C5_MOUSE
conta|Q9NSB2|KRT84_HUMAN

## Sheet: samples
sample ID	sample	MS run file	Identification engine	Identification engine version	Identification result file	Identification fasta files	X!Tandem parameters	Total spectra assigned	Total spectra used	Assignment percentage	Total unique assigned	Total scans	Total MS1	Total MS2	Total MS3	TIC MS1	TIC MS2	TIC MS3
msruna1	20210219_Jamet_1_1_NP_A1	/gorgone/pappso/moulon/raw/20210217_jamet_43_NP_dil/20210219_Jamet_1_1_NP_A1.mzXML	X!Tandem	2015.04.01.1	/gorgone/pappso/moulon/users/thierry/20210217_Jamet_43_NP/run_court_dil/xml/db_cona/20210219_Jamet_1_1_NP_A1.xml	/gorgone/pappso/moulon/users/thierry/database/contaminants_standarts.fasta /gorgone/pappso/moulon/users/thierry/database/JGI_M_polymorpha_20191025_concanavalin.fasta	/gorgone/pappso/tmp/xtpcpp.EKeiev/QExactive_analysis_FDR_semi_V2_hydroxiproline.xml	3596	8808	0.40827	2414	16532	5859	10673	0	6.41126e+12	6.18624e+10	0
msruna2	20210219_Jamet_1_2_NP_A6	/gorgone/pappso/moulon/raw/20210217_jamet_43_NP_dil/20210219_Jamet_1_2_NP_A6.mzXML	X!Tandem	2015.04.01.1	/gorgone/pappso/moulon/users/thierry/20210217_Jamet_43_NP/run_court_dil/xml/db_cona/20210219_Jamet_1_2_NP_A6.xml	/gorgone/pappso/moulon/users/thierry/database/contaminants_standarts.fasta /gorgone/pappso/moulon/users/thierry/database/JGI_M_polymorpha_20191025_concanavalin.fasta	/gorgone/pappso/tmp/xtpcpp.EKeiev/QExactive_analysis_FDR_semi_V2_hydroxiproline.xml	3292	10486	0.31394	2140	18327	5626	12701	0	8.36318e+12	1.24661e+11	0
msruna3	20210219_Jamet_1_3_NP_A11	/gorgone/pappso/moulon/raw/20210217_jamet_43_NP_dil/20210219_Jamet_1_3_NP_A11.mzXML	X!Tandem	2015.04.01.1	/gorgone/pappso/moulon/users/thierry/20210217_Jamet_43_NP/run_court_dil/xml/db_cona/20210219_Jamet_1_3_NP_A11.xml	/gorgone/pappso/moulon/users/thierry/database/contaminants_standarts.fasta /gorgone/pappso/moulon/users/thierry/database/JGI_M_polymorpha_20191025_concanavalin.fasta	/gorgone/pappso/tmp/xtpcpp.EKeiev/QExactive_analysis_FDR_semi_V2_hydroxiproline.xml	3451	8602	0.40119	2221	16376	5862	10514	0	7.07372e+12	5.68121e+10	0
msruna4	20210219_Jamet_2_1_NP_B4	/gorgone/pappso/moulon/raw/20210217_jamet_43_NP_dil/20210219_Jamet_2_1_NP_B4.mzXML	X!Tandem	2015.04.01.1	/gorgone/pappso/moulon/users/thierry/20210217_Jamet_43_NP/run_court_dil/xml/db_cona/20210219_Jamet_2_1_NP_B4.xml	/gorgone/pappso/moulon/users/thierry/database/contaminants_standarts.fasta /gorgone/pappso/moulon/users/thierry/database/JGI_M_polymorpha_20191025_concanavalin.fasta	/gorgone/pappso/tmp/xtpcpp.EKeiev/QExactive_analysis_FDR_semi_V2_hydroxiproline.xml	2656	8774	0.30271	1745	16526	5732	10794	0	5.40477e+12	5.20928e+10	0
msruna5	20210219_Jamet_2_2_NP_B9	/gorgone/pappso/moulon/raw/20210217_jamet_43_NP_dil/20210219_Jamet_2_2_NP_B9.mzXML	X!Tandem	2015.04.01.1	/gorgone/pappso/moulon/users/thierry/20210217_Jamet_43_NP/run_court_dil/xml/db_cona/20210219_Jamet_2_2_NP_B9.xml	/gorgone/pappso/moulon/users/thierry/database/contaminants_standarts.fasta /gorgone/pappso/moulon/users/thierry/database/JGI_M_polymorpha_20191025_concanavalin.fasta	/gorgone/pappso/tmp/xtpcpp.EKeiev/QExactive_analysis_FDR_semi_V2_hydroxiproline.xml	4162	9302	0.44743	2894	17193	5758	11435	0	8.0066e+12	8.44002e+10	0
msruna6	20210219_Jamet_2_3_NP_C2	/gorgone/pappso/moulon/raw/20210217_jamet_43_NP_dil/20210219_Jamet_2_3_NP_C2.mzXML	X!Tandem	2015.04.01.1	/gorgone/pappso/moulon/users/thierry/20210217_Jamet_43_NP/run_court_dil/xml/db_cona/20210219_Jamet_2_3_NP_C2.xml	/gorgone/pappso/moulon/users/thierry/database/contaminants_standarts.fasta /gorgone/pappso/moulon/users/thierry/database/JGI_M_polymorpha_20191025_concanavalin.fasta	/gorgone/pappso/tmp/xtpcpp.EKeiev/QExactive_analysis_FDR_semi_V2_hydroxiproline.xml	3925	9053	0.43356	2690	16717	5870	10847	0	7.79442e+12	7.03918e+10	0
msruna7	20210219_Jamet_3_1_NP_C7	/gorgone/pappso/moulon/raw/20210217_jamet_43_NP_dil/20210219_Jamet_3_1_NP_C7.mzXML	X!Tandem	2015.04.01.1	/gorgone/pappso/moulon/users/thierry/20210217_Jamet_43_NP/run_court_dil/xml/db_cona/20210219_Jamet_3_1_NP_C7.xml	/gorgone/pappso/moulon/users/thierry/database/contaminants_standarts.fasta /gorgone/pappso/moulon/users/thierry/database/JGI_M_polymorpha_20191025_concanavalin.fasta	/gorgone/pappso/tmp/xtpcpp.EKeiev/QExactive_analysis_FDR_semi_V2_hydroxiproline.xml	3242	8546	0.37936	2138	16369	5872	10497	0	6.59523e+12	5.69654e+10	0
msruna8	20210219_Jamet_3_2_NP_C12	/gorgone/pappso/moulon/raw/20210217_jamet_43_NP_dil/20210219_Jamet_3_2_NP_C12.mzXML	X!Tandem	2015.04.01.1	/gorgone/pappso/moulon/users/thierry/20210217_Jamet_43_NP/run_court_dil/xml/db_cona/20210219_Jamet_3_2_NP_C12.xml	/gorgone/pappso/moulon/users/thierry/database/contaminants_standarts.fasta /gorgone/pappso/moulon/users/thierry/database/JGI_M_polymorpha_20191025_concanavalin.fasta	/gorgone/pappso/tmp/xtpcpp.EKeiev/QExactive_analysis_FDR_semi_V2_hydroxiproline.xml	3653	8732	0.41835	2428	16494	5867	10627	0	6.69663e+12	6.03007e+10	0
msruna9	20210219_Jamet_3_3_NP_D5	/gorgone/pappso/moulon/raw/20210217_jamet_43_NP_dil/20210219_Jamet_3_3_NP_D5.mzXML	X!Tandem	2015.04.01.1	/gorgone/pappso/moulon/users/thierry/20210217_Jamet_43_NP/run_court_dil/xml/db_cona/20210219_Jamet_3_3_NP_D5.xml	/gorgone/pappso/moulon/users/thierry/database/contaminants_standarts.fasta /gorgone/pappso/moulon/users/thierry/database/JGI_M_polymorpha_20191025_concanavalin.fasta	/gorgone/pappso/tmp/xtpcpp.EKeiev/QExactive_analysis_FDR_semi_V2_hydroxiproline.xml	3232	8178	0.39521	2185	16022	5964	10058	0	6.72395e+12	4.76982e+10	0

## Sheet: groups
groups	subgroups	proteins	peptides	psm	peptide/mass/sample	prot FDR	pep FDR	psm FDR
545	652	817	6081	42834	23078	0	0.00243	0.00196

## Sheet: proteins
Group ID	Sub-group ID	Protein ID	accession	description	log(Evalue)	coverage	MW	size	spectra	specific spectra	sequences	specific sequences	Uniques peptide-mod-charge	Theoretical number of tryptic peptides	PAI	emPAI	Sub-group proteins	number of MS samples
a1	a1.a1	a1.a1.a1		Keratin, type II cytoskeletal 1 (Cytokeratin 1) (K1) (CK 1) (67 kDa cytokeratin) (Hair alpha protein) - Homo sapiens (Human).	-1434.54	0.78072	65846.9	643	1586	1341	166	139	290	28	10.3571	2.27585e+10	1	9
a1	a1.a2	a1.a2.a1		Keratin, type II cytoskeletal 2 epidermal (Cytokeratin 2e) (K2e) (CK 2e) - Homo sapiens (Human).	-820.704	0.8031	65825.4	645	693	484	94	66	141	32	4.40625	25482	1	9
a1	a1.a3	a1.a3.a1		Keratin, type II cytoskeletal 6A (Cytokeratin-6A) (CK 6A) (K6a keratin) - Homo sapiens (Human)	-523.118	0.71454	60008.3	564	446	75	75	15	120	29	4.13793	13737.2	1	9
a1	a1.a4	a1.a4.a1		Keratin, type II cytoskeletal 6B (Cytokeratin-6B) (CK 6B) (K6b keratin) - Homo sapiens (Human)	-474.195	0.70745	59962.3	564	403	41	71	13	107	28	3.82143	6627.7	1	9
a1	a1.a5	a1.a5.a1		Keratin, type II cytoskeletal 5 (Cytokeratin-5) (CK-5) (Keratin-5) (K5) (58 kDa cytokeratin) - Homo sapiens (Human)	-422.718	0.64407	62340	590	376	130	67	30	101	29	3.48276	3038.2	1	9
a1	a1.a6	a1.a6.a1		Keratin type II cuticular Hb6 (Type II hair keratin Hb6) (Keratin-86) (K86) (K2.11) - Homo sapiens (Human)	-358.138	0.71399	53466.3	486	112	64	45	25	87	31	2.80645	639.4	1	2
a1	a1.a7	a1.a7.a1		Keratin type II cuticular Hb5 (Type II hair keratin Hb5) (Keratin-85) (K85) (K12.12) - Homo sapiens (Human)	-301.81	0.6785	55766.5	507	87	38	42	22	70	30	2.33333	214.443	1	2
a1	a1.a8	a1.a8.a1		Keratin, type II cytoskeletal 5 - Mus musculus (Mouse)	-176.883	0.31897	61728.6	580	195	1	32	1	48	28	1.71429	50.7947	1	9
a1	a1.a9	a1.a9.a1		Keratin, type II cytoskeletal 2 epidermal - Mus musculus (Mouse)	-157.458	0.17822	70879.8	707	177	1	24	2	37	38	0.973684	8.41205	1	9
a1	a1.b10	a1.b10.a1		Keratin-75 (Type II cytokeratin-K6hf) - Homo sapiens (Human)	-125.091	0.21416	59468	551	118	1	22	2	32	29	1.10345	11.6896	1	9
a1	a1.b11	a1.b11.a1		Keratin 77 - Homo sapiens (Human)	-130.753	0.30796	61764.4	578	112	36	22	12	26	29	0.896552	6.88046	1	9
a1	a1.b12	a1.b12.a1		Adult female vagina cDNA, RIKEN full-length enriched library, clone:9930024P18 product:similar to Keratin 2p - Mus musculus (Mouse)	-98.6274	0.15825	62806	594	111	23	21	5	29	32	0.90625	7.05842	1	9
a1	a1.b13	a1.b13.a1		Type-II keratin Kb35 - Mus musculus (Mouse)	-90.759	0.19038	56714.9	520	89	6	17	3	26	27	0.962963	8.18254	1	9
a1	a1.b14	a1.b14.a1		Keratin, type II cytoskeletal 3 (Cytokeratin 3) (K3) (CK3) (65 kDa cytokeratin) - Homo sapiens (Human).	-105.518	0.20509	64471.6	629	98	3	20	2	26	26	1	9	1	9
a1	a1.b15	a1.b15.a1		Keratin, type II cytoskeletal 4 - Mus musculus (Mouse)	-78.1449	0.13143	56248.4	525	87	21	15	3	20	26	0.769231	4.87802	1	9
a1	a1.b16	a1.b16.a1		Keratin, type II cytoskeletal 2 oral (Cytokeratin 2P) (K2P) (CK 2P) - Homo sapiens (Human).	-79.4389	0.13009	65830.1	638	75	6	15	2	20	30	0.666667	3.64159	1	9
a1	a1.b17	a1.b17.a1		KERATIN, TYPE II CYTOSKELETAL 8 (CYTOKERATIN 8) (K8) (CK 8)	-60.2963	0.09317	53641.1	483	84	2	12	1	15	27	0.555556	2.59381	1	9
a1	a1.b18	a1.b18.a1		Keratin, type II cytoskeletal 7 (Cytokeratin 7) (K7) (CK 7) (Sarcolectin) - Homo sapiens (Human).	-60.8171	0.12607	51255.3	468	60	1	13	1	15	27	0.555556	2.59381	1	9
a1	a1.b19	a1.b19.a1		Keratin type II cuticular Hb4 (Type II hair keratin Hb4) (Keratin-84) (K84) - Homo sapiens (Human)	-56.2388	0.11667	64854.6	600	35	2	11	2	13	31	0.419355	1.62636	1	9
a1	a1.b20	a1.b20.a1		Predicted - Mus musculus (Mouse)	-48.1837	0.15123	35143.6	324	41	2	10	1	11	19	0.578947	2.79269	1	9
a2	a2.a1	a2.a1.a1		KERATIN, TYPE I CYTOSKELETAL 10 (CYTOKERATIN 10) (K10) (CK 10)	-982.861	0.7656	59474.9	593	1033	772	119	100	191	24	7.95833	9.08518e+07	1	9
a2	a2.a2	a2.a2.a1		Keratin, type I cytoskeletal 16 (Cytokeratin-16) (CK-16) (Keratin-16) (K16) - Homo sapiens (Human)	-563.893	0.8055	51236.2	473	517	266	72	42	132	30	4.4	25117.9	1	9
a2	a2.a3	a2.a3.a1		KERATIN, TYPE I CYTOSKELETAL 14 (CYTOKERATIN 14) (K14) (CK 14) - Homo sapiens (Human).	-463.533	0.79873	51589.4	472	582	87	64	12	118	28	4.21429	16377.9	1	9
a2	a2.a4	a2.a4.a1		Keratin, type I cuticular Ha1 (Hair keratin, type I Ha1) (Keratin-31) - Homo sapiens (Human)	-318.846	0.8149	47202	416	109	66	43	30	84	23	3.65217	4488.25	1	6
a2	a2.a5	a2.a5.a1		Keratin, type I cytoskeletal 17 (Cytokeratin-17) (CK-17) (Keratin-17) (K17) (39.1) - Homo sapiens (Human)	-346.196	0.67593	48076	432	322	134	52	24	85	27	3.14815	1405.53	1	9
a2	a2.a6	a2.a6.a1		Keratin, type I cytoskeletal 14 - Mus musculus (Mouse)	-250.414	0.44835	52833.9	484	406	2	38	2	77	27	2.85185	709.971	1	9
a2	a2.a7	a2.a7.a1		Keratin, type I cytoskeletal 13 (Cytokeratin-13) (CK-13) (Keratin-13) (K13) - Homo sapiens (Human)	-211.076	0.4869	49555.4	458	314	136	32	19	63	26	2.42308	263.897	1	9
a2	a2.a8	a2.a8.a1		Keratin 31 - Mus musculus (Mouse)	-128.886	0.38702	47086.7	416	58	14	18	5	41	24	1.70833	50.0897	1	6
a2	a2.a9	a2.a9.a1		Keratin, type I cuticular Ha6 (Hair keratin, type I Ha6) - Homo sapiens (Human)	-80.6151	0.32762	52214	467	39	23	15	9	31	25	1.24	16.378	1	5
a3	a3.a1	a3.a1.a1		Keratin, type I cytoskeletal 9 (Cytokeratin 9) (K9) (CK 9) - Homo sapiens (Human).	-1159.78	0.83119	61949.8	622	877	877	119	119	174	18	9.66667	4.64159e+09	1	9
a4	a4.a1	a4.a1.a1	conta|gi|159024207|gb|ABW87339.1|	concanavalin A [Canavalia ensiformis]	-826.943	0.78276	31460.9	290	1603	1603	102	102	163	10	16.3	1.99526e+16	2	9
a4	a4.a1	a4.a1.a2		Concanavalin-A OS=Canavalia ensiformis OX=3823 PE=1 SV=2	-826.943	0.78276	31460.9	290	1603	1603	102	102	163	10	16.3	1.99526e+16	2	9
a5	a5.a1	a5.a1.a1		Beta-casein precursor - Bos taurus (Bovine).	-634.825	0.63393	25091.3	224	632	632	90	90	151	4	37.75	5.62341e+37	1	9
a6	a6.a1	a6.a1.a1	Mapoly0071s0078.1.p	pacid=33007960 transcript=Mapoly0071s0078.1 locus=Mapoly0071s0078 ID=Mapoly0071s0078.1.v3.1 annot-version=v3.1	-417.548	0.47258	71214.5	620	776	71	62	5	128	25	5.12	131825	1	9
a6	a6.a2	a6.a2.a1	Mapoly3313s0001.1.p	pacid=33009545 transcript=Mapoly3313s0001.1 locus=Mapoly3313s0001 ID=Mapoly3313s0001.1.v3.1 annot-version=v3.1	-423.412	0.47352	71736.8	623	752	46	61	3	126	25	5.04	109647	1	9
a6	a6.a3	a6.a3.a1	Mapoly0032s0136.1.p	pacid=33011600 transcript=Mapoly0032s0136.1 locus=Mapoly0032s0136 ID=Mapoly0032s0136.1.v3.1 annot-version=v3.1	-388.686	0.44839	71188.4	620	626	39	55	3	112	24	4.66667	46414.9	1	9
a6	a6.a4	a6.a4.a1	Mapoly0266s0001.1.p	pacid=33024069 transcript=Mapoly0266s0001.1 locus=Mapoly0266s0001 ID=Mapoly0266s0001.1.v3.1 annot-version=v3.1	-280.44	0.42718	47888.7	412	503	53	41	4	90	15	6	999999	2	9
a6	a6.a4	a6.a4.a2	Mapoly0266s0001.2.p	pacid=33024070 transcript=Mapoly0266s0001.2 locus=Mapoly0266s0001 ID=Mapoly0266s0001.2.v3.1 annot-version=v3.1	-280.44	0.42718	47888.7	412	503	53	41	4	90	15	6	999999	2	9
a6	a6.a5	a6.a5.a1	Mapoly0206s0001.1.p	pacid=33011870 transcript=Mapoly0206s0001.1 locus=Mapoly0206s0001 ID=Mapoly0206s0001.1.v3.1 annot-version=v3.1	-184.946	0.29967	68673.8	604	203	154	26	18	45	28	1.60714	39.4709	1	9
a6	a6.a6	a6.a6.a1	Mapoly0084s0086.1.p	pacid=33025652 transcript=Mapoly0084s0086.1 locus=Mapoly0084s0086 ID=Mapoly0084s0086.1.v3.1 annot-version=v3.1	-188.396	0.26307	69694.3	612	272	15	26	2	48	21	2.28571	192.07	1	9
a6	a6.a7	a6.a7.a1	Mapoly0106s0029.1.p	pacid=33017297 transcript=Mapoly0106s0029.1 locus=Mapoly0106s0029 ID=Mapoly0106s0029.1.v3.1 annot-version=v3.1	-128.484	0.16432	73114.1	639	171	2	23	3	45	24	1.875	73.9894	1	9
a6	a6.a8	a6.a8.a1	Mapoly0084s0022.1.p	pacid=33025690 transcript=Mapoly0084s0022.1 locus=Mapoly0084s0022 ID=Mapoly0084s0022.1.v3.1 annot-version=v3.1	-159.535	0.38291	35975.8	316	166	1	23	1	41	11	3.72727	5335.7	1	9
a6	a6.a9	a6.a9.a1	Mapoly0134s0001.1.p	pacid=33025825 transcript=Mapoly0134s0001.1 locus=Mapoly0134s0001 ID=Mapoly0134s0001.1.v3.1 annot-version=v3.1	-141.504	0.22814	61156.6	526	186	11	21	4	38	19	2	99	1	9
a6	a6.b10	a6.b10.a1	Mapoly0117s0055.1.p	pacid=33027556 transcript=Mapoly0117s0055.1 locus=Mapoly0117s0055 ID=Mapoly0117s0055.1.v3.1 annot-version=v3.1	-145.337	0.21304	71897.2	629	217	1	21	1	38	21	1.80952	63.4947	2	9
a6	a6.b10	a6.b10.a2	Mapoly0117s0058.1.p	pacid=33027490 transcript=Mapoly0117s0058.1 locus=Mapoly0117s0058 ID=Mapoly0117s0058.1.v3.1 annot-version=v3.1	-145.337	0.21304	71897.2	629	217	1	21	1	38	21	1.80952	63.4947	2	9
a6	a6.b11	a6.b11.a1	Mapoly0145s0008.1.p	pacid=33019101 transcript=Mapoly0145s0008.1 locus=Mapoly0145s0008 ID=Mapoly0145s0008.1.v3.1 annot-version=v3.1	-123.38	0.26966	70539.8	623	116	56	16	6	24	23	1.04348	10.053	1	9
a6	a6.b12	a6.b12.a1	Mapoly2340s0001.1.p	pacid=33010419 transcript=Mapoly2340s0001.1 locus=Mapoly2340s0001 ID=Mapoly2340s0001.1.v3.1 annot-version=v3.1	-37.7335	0.34356	18322.5	163	100	1	6	1	17	9	1.88889	76.4264	1	9
a6	a6.b13	a6.b13.a1	Mapoly0091s0043.1.p	pacid=33025128 transcript=Mapoly0091s0043.1 locus=Mapoly0091s0043 ID=Mapoly0091s0043.1.v3.1 annot-version=v3.1	-76.6159	0.16246	72135.8	634	55	3	10	2	14	25	0.56	2.63078	1	9
a6	a6.b14	a6.b14.a1	Mapoly0038s0112.1.p	pacid=33004712 transcript=Mapoly0038s0112.1 locus=Mapoly0038s0112 ID=Mapoly0038s0112.1.v3.1 annot-version=v3.1	-46.4122	0.09018	70133	621	45	24	8	3	12	23	0.521739	2.3246	3	8
a6	a6.b14	a6.b14.a2	Mapoly0595s0001.1.p	pacid=33010442 transcript=Mapoly0595s0001.1 locus=Mapoly0595s0001 ID=Mapoly0595s0001.1.v3.1 annot-version=v3.1	-46.4122	0.12727	49775.5	440	45	24	8	3	12	19	0.631579	3.28133	3	8
a6	a6.b14	a6.b14.a3	Mapoly0595s0001.2.p	pacid=33010443 transcript=Mapoly0595s0001.2 locus=Mapoly0595s0001 ID=Mapoly0595s0001.2.v3.1 annot-version=v3.1	-46.4122	0.12727	49775.5	440	45	24	8	3	12	19	0.631579	3.28133	3	8
a7	a7.a1	a7.a1.a1		Alpha-S1-casein precursor - Bos taurus (Bovine).	-431.063	0.70561	24513.4	214	319	319	57	57	74	10	7.4	2.51189e+07	1	9
a8	a8.a1	a8.a1.a1		TRYPSIN PRECURSOR.	-225.709	0.52381	24393.8	231	419	419	36	36	71	11	6.45455	2.84803e+06	1	9
a9	a9.a1	a9.a1.a1	Mapoly0006s0189.1.p	pacid=33007056 transcript=Mapoly0006s0189.1 locus=Mapoly0006s0189 ID=Mapoly0006s0189.1.v3.1 annot-version=v3.1	-278.302	0.52941	58078.3	527	380	380	30	30	75	21	3.57143	3726.59	1	9
b10	b10.a1	b10.a1.a1	Mapoly0064s0029.1.p	pacid=33013505 transcript=Mapoly0064s0029.1 locus=Mapoly0064s0029 ID=Mapoly0064s0029.1.v3.1 annot-version=v3.1	-224.847	0.47149	48987.1	456	435	435	29	29	72	20	3.6	3980.07	1	9
b11	b11.a1	b11.a1.a1	Mapoly0012s0106.1.p	pacid=33017518 transcript=Mapoly0012s0106.1 locus=Mapoly0012s0106 ID=Mapoly0012s0106.1.v3.1 annot-version=v3.1	-296.161	0.34341	46787.3	463	435	435	38	38	60	4	15	1000000000000000	1	9
b12	b12.a1	b12.a1.a1	Mapoly0003s0101.1.p	pacid=33010101 transcript=Mapoly0003s0101.1 locus=Mapoly0003s0101 ID=Mapoly0003s0101.1.v3.1 annot-version=v3.1	-271.179	0.55852	55435.1	487	332	182	31	12	64	18	3.55556	3592.81	1	9
b12	b12.a2	b12.a2.a1	Mapoly0003s0103.1.p	pacid=33009910 transcript=Mapoly0003s0103.1 locus=Mapoly0003s0103 ID=Mapoly0003s0103.1.v3.1 annot-version=v3.1	-174.805	0.41393	55869.5	488	152	2	21	2	37	15	2.46667	291.864	1	9
b13	b13.a1	b13.a1.a1		Alpha-S2-casein precursor [Contains: Casocidin-1 (Casocidin-I)] - Bos taurus (Bovine).	-242.043	0.64865	26002.3	222	178	178	42	42	55	11	5	99999	1	9
b14	b14.a1	b14.a1.a1	Mapoly0013s0084.1.p	pacid=33012365 transcript=Mapoly0013s0084.1 locus=Mapoly0013s0084 ID=Mapoly0013s0084.1.v3.1 annot-version=v3.1	-270.652	0.3342	81040.8	769	229	229	31	31	54	20	2.7	500.187	1	9
b15	b15.a1	b15.a1.a1	Mapoly0048s0002.1.p	pacid=33011412 transcript=Mapoly0048s0002.1 locus=Mapoly0048s0002 ID=Mapoly0048s0002.1.v3.1 annot-version=v3.1	-169.704	0.62464	37723.5	349	320	312	25	24	57	20	2.85	706.946	1	9
b15	b15.a2	b15.a2.a1	Mapoly0048s0003.1.p	pacid=33011424 transcript=Mapoly0048s0003.1 locus=Mapoly0048s0003 ID=Mapoly0048s0003.1.v3.1 annot-version=v3.1	-67.8818	0.31714	37617.3	350	82	74	8	7	15	11	1.36364	22.1013	1	9
b16	b16.a1	b16.a1.a1	Mapoly0016s0137.1.p	pacid=33027152 transcript=Mapoly0016s0137.1 locus=Mapoly0016s0137 ID=Mapoly0016s0137.1.v3.1 annot-version=v3.1	-253.096	0.62698	41726	378	119	30	33	7	48	15	3.2	1583.89	1	9
b16	b16.a2	b16.a2.a1	Mapoly0016s0139.1.p	pacid=33027066 transcript=Mapoly0016s0139.1 locus=Mapoly0016s0139 ID=Mapoly0016s0139.1.v3.1 annot-version=v3.1	-180.895	0.62698	41716.9	378	97	16	24	4	32	15	2.13333	134.936	1	9
b16	b16.a3	b16.a3.a1	Mapoly0134s0041.1.p	pacid=33025829 transcript=Mapoly0134s0041.1 locus=Mapoly0134s0041 ID=Mapoly0134s0041.1.v3.1 annot-version=v3.1	-175.765	0.42063	41691.1	378	71	15	24	3	29	15	1.93333	84.7696	1	9
b17	b17.a1	b17.a1.a1	Mapoly0093s0009.1.p	pacid=33025292 transcript=Mapoly0093s0009.1 locus=Mapoly0093s0009 ID=Mapoly0093s0009.1.v3.1 annot-version=v3.1	-170.656	0.33413	43085.5	416	194	194	28	28	47	7	6.71429	5.17947e+06	1	9
b18	b18.a1	b18.a1.a1	Mapoly0076s0091.1.p	pacid=33016321 transcript=Mapoly0076s0091.1 locus=Mapoly0076s0091 ID=Mapoly0076s0091.1.v3.1 annot-version=v3.1	-186.335	0.32444	53933	487	235	235	20	20	47	12	3.91667	8253.04	1	9
b19	b19.a1	b19.a1.a1	Mapoly0014s0035.1.p	pacid=33015328 transcript=Mapoly0014s0035.1 locus=Mapoly0014s0035 ID=Mapoly0014s0035.1.v3.1 annot-version=v3.1	-220.828	0.30934	70523.9	653	294	294	25	25	49	24	2.04167	109.069	3	9
b19	b19.a1	b19.a1.a2	Mapoly0014s0035.2.p	pacid=33015329 transcript=Mapoly0014s0035.2 locus=Mapoly0014s0035 ID=Mapoly0014s0035.2.v3.1 annot-version=v3.1	-220.828	0.32114	67791.4	629	294	294	25	25	49	23	2.13043	134.031	3	9
b19	b19.a1	b19.a1.a3	Mapoly0014s0035.3.p	pacid=33015330 transcript=Mapoly0014s0035.3 locus=Mapoly0014s0035 ID=Mapoly0014s0035.3.v3.1 annot-version=v3.1	-220.828	0.32372	67173.1	624	294	294	25	25	49	22	2.22727	167.761	3	9
b20	b20.a1	b20.a1.a1	Mapoly2802s0002.1.p	pacid=33004561 transcript=Mapoly2802s0002.1 locus=Mapoly2802s0002 ID=Mapoly2802s0002.1.v3.1 annot-version=v3.1	-102.575	0.63087	17383.4	149	197	51	13	4	44	12	3.66667	4640.59	1	9
b20	b20.a2	b20.a2.a1	Mapoly0011s0071.1.p	pacid=33018046 transcript=Mapoly0011s0071.1 locus=Mapoly0011s0071 ID=Mapoly0011s0071.1.v3.1 annot-version=v3.1	-80.0189	0.43407	20087.9	182	121	64	11	6	31	11	2.81818	656.933	1	9
b20	b20.a3	b20.a3.a1	Mapoly0119s0031.1.p	pacid=33010410 transcript=Mapoly0119s0031.1 locus=Mapoly0119s0031 ID=Mapoly0119s0031.1.v3.1 annot-version=v3.1	-91.142	0.43169	20120.9	183	139	11	10	2	32	11	2.90909	810.131	1	9
b21	b21.a1	b21.a1.a1	Mapoly0014s0109.1.p	pacid=33015507 transcript=Mapoly0014s0109.1 locus=Mapoly0014s0109 ID=Mapoly0014s0109.1.v3.1 annot-version=v3.1	-159.774	0.34141	53607.8	495	160	160	19	19	39	9	4.33333	21543.3	1	9
b22	b22.a1	b22.a1.a1	Mapoly0186s0019.1.p	pacid=33004048 transcript=Mapoly0186s0019.1 locus=Mapoly0186s0019 ID=Mapoly0186s0019.1.v3.1 annot-version=v3.1	-132.123	0.32269	65883.4	595	170	10	18	1	36	17	2.11765	130.113	1	9
b22	b22.a2	b22.a2.a1	Mapoly0217s0007.1.p	pacid=33013744 transcript=Mapoly0217s0007.1 locus=Mapoly0217s0007 ID=Mapoly0217s0007.1.v3.1 annot-version=v3.1	-138.222	0.34454	65822.4	595	161	1	18	1	35	19	1.84211	68.5193	1	9
b22	b22.a3	b22.a3.a1	Mapoly0008s0168.1.p	pacid=33026499 transcript=Mapoly0008s0168.1 locus=Mapoly0008s0168 ID=Mapoly0008s0168.1.v3.1 annot-version=v3.1	-37.9652	0.08235	65660.1	595	46	10	5	2	9	11	0.818182	5.57933	1	8
b23	b23.a1	b23.a1.a1		Kappa-casein precursor [Contains: Casoxin C; Casoxin 6; Casoxin A; Casoxin B; Casoplatelin] - Bos taurus (Bovine).	-207.256	0.51053	21255.9	190	109	109	26	26	34	4	8.5	3.16228e+08	1	9
b24	b24.a1	b24.a1.a1	Mapoly0136s0006.1.p	pacid=33003645 transcript=Mapoly0136s0006.1 locus=Mapoly0136s0006 ID=Mapoly0136s0006.1.v3.1 annot-version=v3.1	-200.257	0.33541	84002.3	802	178	178	24	24	36	17	2.11765	130.113	1	9
b25	b25.a1	b25.a1.a1	Mapoly0040s0090.1.p	pacid=33020850 transcript=Mapoly0040s0090.1 locus=Mapoly0040s0090 ID=Mapoly0040s0090.1.v3.1 annot-version=v3.1	-114.942	0.32851	53868.4	484	127	127	16	16	28	19	1.47368	28.7635	1	9
b26	b26.a1	b26.a1.a1	Mapoly0015s0120.1.p	pacid=33019520 transcript=Mapoly0015s0120.1 locus=Mapoly0015s0120 ID=Mapoly0015s0120.1.v3.1 annot-version=v3.1	-194.057	0.36923	71212.1	650	103	8	23	6	31	23	1.34783	21.2754	1	9
b26	b26.a2	b26.a2.a1	Mapoly0011s0125.1.p	pacid=33017785 transcript=Mapoly0011s0125.1 locus=Mapoly0011s0125 ID=Mapoly0011s0125.1.v3.1 annot-version=v3.1	-169.75	0.31029	71210.9	651	105	13	19	3	27	23	1.17391	13.925	1	9
b26	b26.a3	b26.a3.a1	Mapoly0110s0012.1.p	pacid=33016904 transcript=Mapoly0110s0012.1 locus=Mapoly0110s0012 ID=Mapoly0110s0012.1.v3.1 annot-version=v3.1	-87.5942	0.19242	75666.3	712	26	23	10	9	10	28	0.357143	1.27585	1	8
b27	b27.a1	b27.a1.a1	Mapoly0007s0111.1.p	pacid=33022153 transcript=Mapoly0007s0111.1 locus=Mapoly0007s0111 ID=Mapoly0007s0111.1.v3.1 annot-version=v3.1	-160.944	0.49758	45236.4	414	179	179	18	18	34	18	1.88889	76.4264	1	9
b28	b28.a1	b28.a1.a1	Mapoly0001s0526.1.p	pacid=33020126 transcript=Mapoly0001s0526.1 locus=Mapoly0001s0526 ID=Mapoly0001s0526.1.v3.1 annot-version=v3.1	-156.307	0.43936	54505.5	503	164	164	18	18	28	19	1.47368	28.7635	1	9
b29	b29.a1	b29.a1.a1	Mapoly0045s0021.1.p	pacid=33015206 transcript=Mapoly0045s0021.1 locus=Mapoly0045s0021 ID=Mapoly0045s0021.1.v3.1 annot-version=v3.1	-130.188	0.43168	54702.9	505	142	133	19	17	30	21	1.42857	25.827	1	9
b29	b29.a2	b29.a2.a1	Mapoly0002s0292.1.p	pacid=33023543 transcript=Mapoly0002s0292.1 locus=Mapoly0002s0292 ID=Mapoly0002s0292.1.v3.1 annot-version=v3.1	-20.4631	0.07031	54631.1	512	14	5	3	1	3	8	0.375	1.37137	2	6
b29	b29.a2	b29.a2.a2	Mapoly0002s0292.2.p	pacid=33023544 transcript=Mapoly0002s0292.2 locus=Mapoly0002s0292 ID=Mapoly0002s0292.2.v3.1 annot-version=v3.1	-20.4631	0.07031	54631.1	512	14	5	3	1	3	8	0.375	1.37137	2	6
b30	b30.a1	b30.a1.a1	Mapoly0027s0087.1.p	pacid=33021420 transcript=Mapoly0027s0087.1 locus=Mapoly0027s0087 ID=Mapoly0027s0087.1.v3.1 annot-version=v3.1	-81.1926	0.21106	42390.3	398	106	106	10	10	31	13	2.38462	241.446	1	9
b31	b31.a1	b31.a1.a1	Mapoly0114s0039.1.p	pacid=33004125 transcript=Mapoly0114s0039.1 locus=Mapoly0114s0039 ID=Mapoly0114s0039.1.v3.1 annot-version=v3.1	-160.455	0.5989	20124	182	168	168	18	18	32	9	3.55556	3592.81	1	9
b32	b32.a1	b32.a1.a1	Mapoly0006s0004.1.p	pacid=33007206 transcript=Mapoly0006s0004.1 locus=Mapoly0006s0004 ID=Mapoly0006s0004.1.v3.1 annot-version=v3.1	-126.036	0.4058	43655	414	242	242	14	14	36	17	2.11765	130.113	1	9
b33	b33.a1	b33.a1.a1	Mapoly0070s0086.1.p	pacid=33007680 transcript=Mapoly0070s0086.1 locus=Mapoly0070s0086 ID=Mapoly0070s0086.1.v3.1 annot-version=v3.1	-151.486	0.18045	119154	1064	102	102	20	20	30	27	1.11111	11.9155	1	9
b34	b34.a1	b34.a1.a1	Mapoly0059s0025.1.p	pacid=33006605 transcript=Mapoly0059s0025.1 locus=Mapoly0059s0025 ID=Mapoly0059s0025.1.v3.1 annot-version=v3.1	-120.69	0.3299	52496.7	485	154	154	12	12	30	15	2	99	1	9
b35	b35.a1	b35.a1.a1	Mapoly0088s0001.1.p	pacid=33012083 transcript=Mapoly0088s0001.1 locus=Mapoly0088s0001 ID=Mapoly0088s0001.1.v3.1 annot-version=v3.1	-106.387	0.27481	57972.8	524	103	103	16	16	27	20	1.35	21.3872	1	9
b36	b36.a1	b36.a1.a1	Mapoly0082s0063.1.p	pacid=33004587 transcript=Mapoly0082s0063.1 locus=Mapoly0082s0063 ID=Mapoly0082s0063.1.v3.1 annot-version=v3.1	-118.361	0.21639	101794	915	65	65	16	16	26	32	0.8125	5.49382	1	8
b37	b37.a1	b37.a1.a1	Mapoly0129s0024.1.p	pacid=33006044 transcript=Mapoly0129s0024.1 locus=Mapoly0129s0024 ID=Mapoly0129s0024.1.v3.1 annot-version=v3.1	-127.489	0.43305	51667.4	478	64	64	17	17	27	26	1.03846	9.92601	1	9
b38	b38.a1	b38.a1.a1	Mapoly0068s0042.1.p	pacid=33024882 transcript=Mapoly0068s0042.1 locus=Mapoly0068s0042 ID=Mapoly0068s0042.1.v3.1 annot-version=v3.1	-131.142	0.18966	112595	1044	41	41	18	18	24	37	0.648649	3.45296	1	6
b39	b39.a1	b39.a1.a1	Mapoly0186s0007.1.p	pacid=33004053 transcript=Mapoly0186s0007.1 locus=Mapoly0186s0007 ID=Mapoly0186s0007.1.v3.1 annot-version=v3.1	-121.824	0.31616	59374.7	563	132	132	14	14	26	14	1.85714	70.9686	1	9
b40	b40.a1	b40.a1.a1	Mapoly0066s0089.1.p	pacid=33005899 transcript=Mapoly0066s0089.1 locus=Mapoly0066s0089 ID=Mapoly0066s0089.1.v3.1 annot-version=v3.1	-113.314	0.45977	36870	348	96	96	15	15	28	7	4	9999	1	8
b41	b41.a1	b41.a1.a1	Mapoly0022s0132.1.p	pacid=33011074 transcript=Mapoly0022s0132.1 locus=Mapoly0022s0132 ID=Mapoly0022s0132.1.v3.1 annot-version=v3.1	-113.251	0.31875	52230.2	480	81	81	15	15	26	20	1.3	18.9526	2	7
b41	b41.a1	b41.a1.a2	Mapoly0022s0132.2.p	pacid=33011075 transcript=Mapoly0022s0132.2 locus=Mapoly0022s0132 ID=Mapoly0022s0132.2.v3.1 annot-version=v3.1	-113.251	0.34305	48561.5	446	81	81	15	15	26	19	1.36842	22.3572	2	7
b42	b42.a1	b42.a1.a1	Mapoly0013s0012.1.p	pacid=33012499 transcript=Mapoly0013s0012.1 locus=Mapoly0013s0012 ID=Mapoly0013s0012.1.v3.1 annot-version=v3.1	-103.231	0.24208	85105	789	77	77	15	15	23	31	0.741935	4.51995	2	9
b42	b42.a1	b42.a1.a2	Mapoly0013s0012.2.p	pacid=33012500 transcript=Mapoly0013s0012.2 locus=Mapoly0013s0012 ID=Mapoly0013s0012.2.v3.1 annot-version=v3.1	-103.231	0.25638	79924.3	745	77	77	15	15	23	28	0.821429	5.6287	2	9
b43	b43.a1	b43.a1.a1	Mapoly0055s0029.1.p	pacid=33010673 transcript=Mapoly0055s0029.1 locus=Mapoly0055s0029 ID=Mapoly0055s0029.1.v3.1 annot-version=v3.1	-122.356	0.23341	93691.6	844	52	52	16	16	22	35	0.628571	3.25179	2	9
b43	b43.a1	b43.a1.a2	Mapoly0055s0033.1.p	pacid=33010641 transcript=Mapoly0055s0033.1 locus=Mapoly0055s0033 ID=Mapoly0055s0033.1.v3.1 annot-version=v3.1	-122.356	0.23341	93691.6	844	52	52	16	16	22	35	0.628571	3.25179	2	9
b44	b44.a1	b44.a1.a1	Mapoly0049s0102.1.p	pacid=33009264 transcript=Mapoly0049s0102.1 locus=Mapoly0049s0102 ID=Mapoly0049s0102.1.v3.1 annot-version=v3.1	-146.54	0.48395	46005.1	405	108	108	19	19	26	24	1.08333	11.1153	1	9
b45	b45.a1	b45.a1.a1	Mapoly0053s0046.1.p	pacid=33015040 transcript=Mapoly0053s0046.1 locus=Mapoly0053s0046 ID=Mapoly0053s0046.1.v3.1 annot-version=v3.1	-111.613	0.69412	27977	255	88	88	15	15	23	15	1.53333	33.1455	1	9
b46	b46.a1	b46.a1.a1	Mapoly0008s0265.1.p	pacid=33026532 transcript=Mapoly0008s0265.1 locus=Mapoly0008s0265 ID=Mapoly0008s0265.1.v3.1 annot-version=v3.1	-124.26	0.61728	34569.7	324	70	70	15	15	22	20	1.1	11.5893	1	9
b47	b47.a1	b47.a1.a1	Mapoly0066s0086.1.p	pacid=33005965 transcript=Mapoly0066s0086.1 locus=Mapoly0066s0086 ID=Mapoly0066s0086.1.v3.1 annot-version=v3.1	-123.163	0.43142	49773.5	452	50	10	16	4	24	17	1.41176	24.8086	1	8
b47	b47.a2	b47.a2.a1	Mapoly0120s0003.1.p	pacid=33019701 transcript=Mapoly0120s0003.1 locus=Mapoly0120s0003 ID=Mapoly0120s0003.1.v3.1 annot-version=v3.1	-122.137	0.38053	49735.4	452	45	10	16	6	22	18	1.22222	15.681	1	8
b47	b47.a3	b47.a3.a1	Mapoly0191s0002.1.p	pacid=33013734 transcript=Mapoly0191s0002.1 locus=Mapoly0191s0002 ID=Mapoly0191s0002.1.v3.1 annot-version=v3.1	-98.0329	0.30531	49606.4	452	43	4	12	1	20	18	1.11111	11.9155	1	8
b47	b47.a4	b47.a4.a1	Mapoly0037s0019.1.p	pacid=33008342 transcript=Mapoly0037s0019.1 locus=Mapoly0037s0019 ID=Mapoly0037s0019.1.v3.1 annot-version=v3.1	-50.662	0.19348	50460.9	460	18	1	7	1	9	18	0.5	2.16228	3	8
b47	b47.a4	b47.a4.a2	Mapoly0037s0019.2.p	pacid=33008344 transcript=Mapoly0037s0019.2 locus=Mapoly0037s0019 ID=Mapoly0037s0019.2.v3.1 annot-version=v3.1	-50.662	0.2119	45969.7	420	18	1	7	1	9	15	0.6	2.98107	3	8
b47	b47.a4	b47.a4.a3	Mapoly0037s0019.3.p	pacid=33008343 transcript=Mapoly0037s0019.3 locus=Mapoly0037s0019 ID=Mapoly0037s0019.3.v3.1 annot-version=v3.1	-50.662	0.2119	45969.7	420	18	1	7	1	9	15	0.6	2.98107	3	8
b48	b48.a1	b48.a1.a1	Mapoly0102s0040.1.p	pacid=33007465 transcript=Mapoly0102s0040.1 locus=Mapoly0102s0040 ID=Mapoly0102s0040.1.v3.1 annot-version=v3.1	-141.7	0.27179	83893.5	780	98	98	17	17	21	28	0.75	4.62341	1	9
b49	b49.a1	b49.a1.a1	Mapoly0057s0006.1.p	pacid=33011721 transcript=Mapoly0057s0006.1 locus=Mapoly0057s0006 ID=Mapoly0057s0006.1.v3.1 annot-version=v3.1	-130.442	0.41626	42879.3	406	75	61	17	13	22	19	1.15789	13.3845	1	9
b49	b49.a2	b49.a2.a1	Mapoly0055s0115.1.p	pacid=33010590 transcript=Mapoly0055s0115.1 locus=Mapoly0055s0115 ID=Mapoly0055s0115.1.v3.1 annot-version=v3.1	-103.029	0.30349	47865.7	458	48	34	12	8	15	20	0.75	4.62341	1	9
b50	b50.a1	b50.a1.a1	Mapoly0053s0009.1.p	pacid=33015033 transcript=Mapoly0053s0009.1 locus=Mapoly0053s0009 ID=Mapoly0053s0009.1.v3.1 annot-version=v3.1	-96.568	0.2627	64905	571	104	104	13	13	22	22	1	9	1	9
b51	b51.a1	b51.a1.a1	Mapoly0025s0081.1.p	pacid=33027238 transcript=Mapoly0025s0081.1 locus=Mapoly0025s0081 ID=Mapoly0025s0081.1.v3.1 annot-version=v3.1	-117.764	0.43516	51525.2	455	95	22	15	4	24	15	1.6	38.8107	1	9
b51	b51.a2	b51.a2.a1	Mapoly0008s0143.1.p	pacid=33026413 transcript=Mapoly0008s0143.1 locus=Mapoly0008s0143 ID=Mapoly0008s0143.1.v3.1 annot-version=v3.1	-93.5329	0.29193	54770	483	74	1	12	1	20	17	1.17647	14.0131	1	9
b51	b51.a3	b51.a3.a1	Mapoly0008s0144.1.p	pacid=33026443 transcript=Mapoly0008s0144.1 locus=Mapoly0008s0144 ID=Mapoly0008s0144.1.v3.1 annot-version=v3.1	-10	0.05022	51321.1	458	9	6	2	1	2	13	0.153846	0.425103	4	6
b51	b51.a3	b51.a3.a2	Mapoly0008s0144.2.p	pacid=33026446 transcript=Mapoly0008s0144.2 locus=Mapoly0008s0144 ID=Mapoly0008s0144.2.v3.1 annot-version=v3.1	-10	0.05022	51321.1	458	9	6	2	1	2	13	0.153846	0.425103	4	6
b51	b51.a3	b51.a3.a3	Mapoly0008s0144.3.p	pacid=33026445 transcript=Mapoly0008s0144.3 locus=Mapoly0008s0144 ID=Mapoly0008s0144.3.v3.1 annot-version=v3.1	-10	0.05022	51321.1	458	9	6	2	1	2	13	0.153846	0.425103	4	6
b51	b51.a3	b51.a3.a4	Mapoly0008s0144.4.p	pacid=33026444 transcript=Mapoly0008s0144.4 locus=Mapoly0008s0144 ID=Mapoly0008s0144.4.v3.1 annot-version=v3.1	-10	0.05022	51321.1	458	9	6	2	1	2	13	0.153846	0.425103	4	6
b52	b52.a1	b52.a1.a1	Mapoly0088s0025.1.p	pacid=33012000 transcript=Mapoly0088s0025.1 locus=Mapoly0088s0025 ID=Mapoly0088s0025.1.v3.1 annot-version=v3.1	-93.7637	0.22929	75610	676	87	87	10	10	24	20	1.2	14.8489	1	8
b53	b53.a1	b53.a1.a1	Mapoly0001s0408.1.p	pacid=33020234 transcript=Mapoly0001s0408.1 locus=Mapoly0001s0408 ID=Mapoly0001s0408.1.v3.1 annot-version=v3.1	-82.7969	0.34978	49910.7	446	43	4	15	2	19	19	1	9	1	7
b53	b53.a2	b53.a2.a1	Mapoly0109s0019.1.p	pacid=33021265 transcript=Mapoly0109s0019.1 locus=Mapoly0109s0019 ID=Mapoly0109s0019.1.v3.1 annot-version=v3.1	-85.1915	0.34978	49892.7	446	42	3	15	2	19	19	1	9	1	7
b53	b53.a3	b53.a3.a1	Mapoly0158s0010.1.p	pacid=33010487 transcript=Mapoly0158s0010.1 locus=Mapoly0158s0010 ID=Mapoly0158s0010.1.v3.1 annot-version=v3.1	-74.8444	0.3018	49638.6	444	39	2	13	1	17	17	1	9	1	7
b53	b53.a4	b53.a4.a1	Mapoly0028s0089.1.p	pacid=33018207 transcript=Mapoly0028s0089.1 locus=Mapoly0028s0089 ID=Mapoly0028s0089.1.v3.1 annot-version=v3.1	-42.7059	0.18121	50164.9	447	21	2	9	1	11	17	0.647059	3.43669	1	6
b54	b54.a1	b54.a1.a1	Mapoly0155s0023.1.p	pacid=33019158 transcript=Mapoly0155s0023.1 locus=Mapoly0155s0023 ID=Mapoly0155s0023.1.v3.1 annot-version=v3.1	-84.4988	0.16689	82853.2	761	88	88	10	10	18	13	1.38462	23.2446	1	9
b55	b55.a1	b55.a1.a1	Mapoly0122s0035.1.p	pacid=33014831 transcript=Mapoly0122s0035.1 locus=Mapoly0122s0035 ID=Mapoly0122s0035.1.v3.1 annot-version=v3.1	-116.242	0.26389	73399.3	648	86	86	12	12	21	22	0.954545	8.00628	1	9
b56	b56.a1	b56.a1.a1	Mapoly0079s0038.1.p	pacid=33012179 transcript=Mapoly0079s0038.1 locus=Mapoly0079s0038 ID=Mapoly0079s0038.1.v3.1 annot-version=v3.1	-87.815	0.27114	43970	402	84	84	10	10	21	13	1.61538	40.2463	1	9
b57	b57.a1	b57.a1.a1	Mapoly0032s0077.1.p	pacid=33011497 transcript=Mapoly0032s0077.1 locus=Mapoly0032s0077 ID=Mapoly0032s0077.1.v3.1 annot-version=v3.1	-49.5125	0.31527	21251.8	203	119	119	7	7	18	3	6	999999	1	9
b58	b58.a1	b58.a1.a1	Mapoly0004s0107.1.p	pacid=33015716 transcript=Mapoly0004s0107.1 locus=Mapoly0004s0107 ID=Mapoly0004s0107.1.v3.1 annot-version=v3.1	-119.618	0.33081	58102.5	529	78	78	16	16	19	19	1	9	2	9
b58	b58.a1	b58.a1.a2	Mapoly0004s0107.2.p	pacid=33015717 transcript=Mapoly0004s0107.2 locus=Mapoly0004s0107 ID=Mapoly0004s0107.2.v3.1 annot-version=v3.1	-119.618	0.33081	58102.5	529	78	78	16	16	19	19	1	9	2	9
b59	b59.a1	b59.a1.a1	Mapoly0073s0071.1.p	pacid=33005734 transcript=Mapoly0073s0071.1 locus=Mapoly0073s0071 ID=Mapoly0073s0071.1.v3.1 annot-version=v3.1	-102.279	0.33263	52260.2	472	87	87	10	10	20	14	1.42857	25.827	1	9
b60	b60.a1	b60.a1.a1	Mapoly0130s0001.1.p	pacid=33010825 transcript=Mapoly0130s0001.1 locus=Mapoly0130s0001 ID=Mapoly0130s0001.1.v3.1 annot-version=v3.1	-75.6481	0.5122	22435.8	205	84	84	11	11	19	9	2.11111	128.155	1	9
b61	b61.a1	b61.a1.a1	Mapoly0193s0011.1.p	pacid=33008242 transcript=Mapoly0193s0011.1 locus=Mapoly0193s0011 ID=Mapoly0193s0011.1.v3.1 annot-version=v3.1	-55.7455	0.40686	21940.3	204	83	46	10	3	19	9	2.11111	128.155	1	9
b61	b61.a2	b61.a2.a1	Mapoly0082s0058.1.p	pacid=33004637 transcript=Mapoly0082s0058.1 locus=Mapoly0082s0058 ID=Mapoly0082s0058.1.v3.1 annot-version=v3.1	-58.7193	0.34804	21550.4	204	56	37	9	5	15	9	1.66667	45.4159	1	9
b61	b61.a3	b61.a3.a1	Mapoly0193s0010.1.p	pacid=33008243 transcript=Mapoly0193s0010.1 locus=Mapoly0193s0010 ID=Mapoly0193s0010.1.v3.1 annot-version=v3.1	-77.5139	0.35784	21894.4	204	56	16	10	2	16	7	2.28571	192.07	1	9
b61	b61.a4	b61.a4.a1	Mapoly0193s0003.1.p	pacid=33008245 transcript=Mapoly0193s0003.1 locus=Mapoly0193s0003 ID=Mapoly0193s0003.1.v3.1 annot-version=v3.1	-61.6109	0.34804	21887.3	204	49	9	9	1	14	6	2.33333	214.443	1	9
b61	b61.a5	b61.a5.a1	Mapoly0197s0001.1.p	pacid=33011946 transcript=Mapoly0197s0001.1 locus=Mapoly0197s0001 ID=Mapoly0197s0001.1.v3.1 annot-version=v3.1	-55.5248	0.42647	21937.4	204	42	5	10	3	13	7	1.85714	70.9686	2	9
b61	b61.a5	b61.a5.a2	Mapoly0197s0002.1.p	pacid=33011932 transcript=Mapoly0197s0002.1 locus=Mapoly0197s0002 ID=Mapoly0197s0002.1.v3.1 annot-version=v3.1	-55.5248	0.42647	21917.4	204	42	5	10	3	13	6	2.16667	145.78	2	9
b61	b61.a6	b61.a6.a1	Mapoly0193s0008.1.p	pacid=33008248 transcript=Mapoly0193s0008.1 locus=Mapoly0193s0008 ID=Mapoly0193s0008.1.v3.1 annot-version=v3.1	-47.5139	0.33333	22013.5	204	38	0	8	1	11	7	1.57143	36.2759	1	9
b61	b61.a7	b61.a7.a1	Mapoly0193s0007.1.p	pacid=33008246 transcript=Mapoly0193s0007.1 locus=Mapoly0193s0007 ID=Mapoly0193s0007.1.v3.1 annot-version=v3.1	-15.0123	0.20321	20478.6	187	13	1	3	1	4	10	0.4	1.51189	1	9
b61	b61.a8	b61.a8.a1	Mapoly0193s0005.1.p	pacid=33008254 transcript=Mapoly0193s0005.1 locus=Mapoly0193s0005 ID=Mapoly0193s0005.1.v3.1 annot-version=v3.1	-24.9548	0.2549	21928.3	204	6	2	4	2	4	6	0.666667	3.64159	1	3
b62	b62.a1	b62.a1.a1	Mapoly0056s0080.1.p	pacid=33013251 transcript=Mapoly0056s0080.1 locus=Mapoly0056s0080 ID=Mapoly0056s0080.1.v3.1 annot-version=v3.1	-112.556	0.26252	72764.3	659	66	66	15	15	18	21	0.857143	6.19686	1	9
b63	b63.a1	b63.a1.a1	Mapoly0002s0096.1.p	pacid=33023261 transcript=Mapoly0002s0096.1 locus=Mapoly0002s0096 ID=Mapoly0002s0096.1.v3.1 annot-version=v3.1	-79.3185	0.24675	69222.6	616	51	51	13	13	16	28	0.571429	2.72759	2	8
b63	b63.a1	b63.a1.a2	Mapoly0002s0096.2.p	pacid=33023262 transcript=Mapoly0002s0096.2 locus=Mapoly0002s0096 ID=Mapoly0002s0096.2.v3.1 annot-version=v3.1	-79.3185	0.24675	69222.6	616	51	51	13	13	16	28	0.571429	2.72759	2	8
b64	b64.a1	b64.a1.a1	Mapoly0051s0113.1.p	pacid=33021626 transcript=Mapoly0051s0113.1 locus=Mapoly0051s0113 ID=Mapoly0051s0113.1.v3.1 annot-version=v3.1	-79.1634	0.17806	77733.5	702	51	51	10	10	16	21	0.761905	4.77969	1	9
b65	b65.a1	b65.a1.a1	Mapoly0016s0174.1.p	pacid=33027160 transcript=Mapoly0016s0174.1 locus=Mapoly0016s0174 ID=Mapoly0016s0174.1.v3.1 annot-version=v3.1	-84.8449	0.28446	50451.4	457	47	47	9	9	19	18	1.05556	10.3646	2	6
b65	b65.a1	b65.a1.a2	Mapoly0016s0174.2.p	pacid=33027161 transcript=Mapoly0016s0174.2 locus=Mapoly0016s0174 ID=Mapoly0016s0174.2.v3.1 annot-version=v3.1	-84.8449	0.29817	48001.1	436	47	47	9	9	19	16	1.1875	14.3993	2	6
b66	b66.a1	b66.a1.a1	Mapoly0016s0036.1.p	pacid=33027142 transcript=Mapoly0016s0036.1 locus=Mapoly0016s0036 ID=Mapoly0016s0036.1.v3.1 annot-version=v3.1	-80.7742	0.37984	42541.1	387	44	44	14	14	17	12	1.41667	25.1016	1	9
b67	b67.a1	b67.a1.a1	Mapoly0001s0237.1.p	pacid=33020208 transcript=Mapoly0001s0237.1 locus=Mapoly0001s0237 ID=Mapoly0001s0237.1.v3.1 annot-version=v3.1	-70.8759	0.22564	44288.7	390	42	42	10	10	17	16	1.0625	10.5478	1	7
b68	b68.a1	b68.a1.a1	Mapoly0087s0023.1.p	pacid=33025614 transcript=Mapoly0087s0023.1 locus=Mapoly0087s0023 ID=Mapoly0087s0023.1.v3.1 annot-version=v3.1	-55.1243	0.13009	71903.1	638	91	70	8	6	18	28	0.642857	3.39397	1	9
b68	b68.a2	b68.a2.a1	Mapoly0120s0058.1.p	pacid=33019677 transcript=Mapoly0120s0058.1 locus=Mapoly0120s0058 ID=Mapoly0120s0058.1.v3.1 annot-version=v3.1	-17.4614	0.05508	66208.2	581	21	0	3	1	4	29	0.137931	0.373824	1	9
b69	b69.a1	b69.a1.a1	Mapoly0135s0042.1.p	pacid=33005239 transcript=Mapoly0135s0042.1 locus=Mapoly0135s0042 ID=Mapoly0135s0042.1.v3.1 annot-version=v3.1	-79.4181	0.48571	18605.1	175	76	74	9	8	17	6	2.83333	680.292	1	9
b69	b69.a2	b69.a2.a1	Mapoly0333s0001.1.p	pacid=33011690 transcript=Mapoly0333s0001.1 locus=Mapoly0333s0001 ID=Mapoly0333s0001.1.v3.1 annot-version=v3.1	-32.9681	0.35556	18865.5	180	16	14	4	3	4	6	0.666667	3.64159	1	9
b70	b70.a1	b70.a1.a1	Mapoly0037s0038.1.p	pacid=33008351 transcript=Mapoly0037s0038.1 locus=Mapoly0037s0038 ID=Mapoly0037s0038.1.v3.1 annot-version=v3.1	-84.4743	0.22346	60514.9	537	73	73	12	12	16	21	0.761905	4.77969	1	9
b71	b71.a1	b71.a1.a1	Mapoly0025s0077.1.p	pacid=33027274 transcript=Mapoly0025s0077.1 locus=Mapoly0025s0077 ID=Mapoly0025s0077.1.v3.1 annot-version=v3.1	-91.526	0.27425	32536.5	299	64	64	9	9	17	5	3.4	2510.89	1	9
b72	b72.a1	b72.a1.a1	Mapoly0041s0057.1.p	pacid=33004960 transcript=Mapoly0041s0057.1 locus=Mapoly0041s0057 ID=Mapoly0041s0057.1.v3.1 annot-version=v3.1	-105.207	0.3619	46307.8	420	62	62	12	12	20	21	0.952381	7.96151	1	9
b73	b73.a1	b73.a1.a1	Mapoly0030s0071.1.p	pacid=33006890 transcript=Mapoly0030s0071.1 locus=Mapoly0030s0071 ID=Mapoly0030s0071.1.v3.1 annot-version=v3.1	-73.7994	0.26316	55019.3	494	54	54	13	13	15	23	0.652174	3.48925	1	9
b74	b74.a1	b74.a1.a1	Mapoly0160s0020.1.p	pacid=33018605 transcript=Mapoly0160s0020.1 locus=Mapoly0160s0020 ID=Mapoly0160s0020.1.v3.1 annot-version=v3.1	-88.288	0.32519	58591.9	532	52	52	12	12	17	27	0.62963	3.26216	3	8
b74	b74.a1	b74.a1.a2	Mapoly0160s0020.2.p	pacid=33018606 transcript=Mapoly0160s0020.2 locus=Mapoly0160s0020 ID=Mapoly0160s0020.2.v3.1 annot-version=v3.1	-88.288	0.346	55035	500	52	52	12	12	17	25	0.68	3.7863	3	8
b74	b74.a1	b74.a1.a3	Mapoly0160s0020.3.p	pacid=33018607 transcript=Mapoly0160s0020.3 locus=Mapoly0160s0020 ID=Mapoly0160s0020.3.v3.1 annot-version=v3.1	-88.288	0.346	55035	500	52	52	12	12	17	25	0.68	3.7863	3	8
b75	b75.a1	b75.a1.a1	Mapoly0082s0072.1.p	pacid=33004626 transcript=Mapoly0082s0072.1 locus=Mapoly0082s0072 ID=Mapoly0082s0072.1.v3.1 annot-version=v3.1	-73.4709	0.65909	18654.2	176	45	45	10	10	15	11	1.36364	22.1013	1	8
b76	b76.a1	b76.a1.a1	Mapoly0869s0001.1.p	pacid=33020692 transcript=Mapoly0869s0001.1 locus=Mapoly0869s0001 ID=Mapoly0869s0001.1.v3.1 annot-version=v3.1	-83.831	0.12626	97061	895	43	43	9	9	15	29	0.517241	2.29034	1	9
b77	b77.a1	b77.a1.a1	Mapoly0075s0023.1.p	pacid=33018471 transcript=Mapoly0075s0023.1 locus=Mapoly0075s0023 ID=Mapoly0075s0023.1.v3.1 annot-version=v3.1	-77.8649	0.33858	43317.1	381	36	36	11	11	14	20	0.7	4.01187	1	9
b78	b78.a1	b78.a1.a1	Mapoly0041s0090.1.p	pacid=33005018 transcript=Mapoly0041s0090.1 locus=Mapoly0041s0090 ID=Mapoly0041s0090.1.v3.1 annot-version=v3.1	-62.7712	0.32573	53054.2	482	24	24	11	11	16	22	0.727273	4.3367	1	5
b79	b79.a1	b79.a1.a1	Mapoly0104s0015.1.p	pacid=33012524 transcript=Mapoly0104s0015.1 locus=Mapoly0104s0015 ID=Mapoly0104s0015.1.v3.1 annot-version=v3.1	-64.2687	0.29971	38613	347	88	88	8	8	17	12	1.41667	25.1016	1	9
b80	b80.a1	b80.a1.a1	Mapoly0001s0023.1.p	pacid=33019953 transcript=Mapoly0001s0023.1 locus=Mapoly0001s0023 ID=Mapoly0001s0023.1.v3.1 annot-version=v3.1	-107.823	0.2552	58778.2	529	78	78	13	13	19	16	1.1875	14.3993	1	9
b81	b81.a1	b81.a1.a1	Mapoly0051s0021.1.p	pacid=33021730 transcript=Mapoly0051s0021.1 locus=Mapoly0051s0021 ID=Mapoly0051s0021.1.v3.1 annot-version=v3.1	-67.6274	0.27527	49807.8	465	78	78	10	10	14	12	1.16667	13.678	1	9
b82	b82.a1	b82.a1.a1	Mapoly0005s0037.1.p	pacid=33003415 transcript=Mapoly0005s0037.1 locus=Mapoly0005s0037 ID=Mapoly0005s0037.1.v3.1 annot-version=v3.1	-88.4328	0.45259	25652.2	232	73	73	11	11	18	10	1.8	62.0957	1	9
b83	b83.a1	b83.a1.a1	Mapoly0074s0006.1.p	pacid=33027707 transcript=Mapoly0074s0006.1 locus=Mapoly0074s0006 ID=Mapoly0074s0006.1.v3.1 annot-version=v3.1	-93.4284	0.17729	52417.7	502	66	66	10	10	18	8	2.25	176.828	1	9
b84	b84.a1	b84.a1.a1	Mapoly0053s0099.1.p	pacid=33015034 transcript=Mapoly0053s0099.1 locus=Mapoly0053s0099 ID=Mapoly0053s0099.1.v3.1 annot-version=v3.1	-117.364	0.21021	87188.9	842	68	68	12	12	14	24	0.583333	2.83119	1	9
b85	b85.a1	b85.a1.a1	Mapoly0101s0015.1.p	pacid=33004021 transcript=Mapoly0101s0015.1 locus=Mapoly0101s0015 ID=Mapoly0101s0015.1.v3.1 annot-version=v3.1	-79.003	0.29437	23274.2	231	66	66	11	11	16	3	5.33333	215442	1	9
b86	b86.a1	b86.a1.a1	Mapoly0049s0099.1.p	pacid=33009327 transcript=Mapoly0049s0099.1 locus=Mapoly0049s0099 ID=Mapoly0049s0099.1.v3.1 annot-version=v3.1	-76.4664	0.13209	319974	3119	20	20	13	13	13	97	0.134021	0.361509	1	4
b87	b87.a1	b87.a1.a1	Mapoly0170s0029.1.p	pacid=33016222 transcript=Mapoly0170s0029.1 locus=Mapoly0170s0029 ID=Mapoly0170s0029.1.v3.1 annot-version=v3.1	-78.5206	0.30833	52895.8	480	53	53	11	11	16	17	0.941176	7.73326	1	9
b88	b88.a1	b88.a1.a1	Mapoly0144s0027.1.p	pacid=33018284 transcript=Mapoly0144s0027.1 locus=Mapoly0144s0027 ID=Mapoly0144s0027.1.v3.1 annot-version=v3.1	-75.6166	0.18237	92308.1	817	39	39	13	13	14	33	0.424242	1.65609	1	9
b89	b89.a1	b89.a1.a1	Mapoly0131s0006.1.p	pacid=33013991 transcript=Mapoly0131s0006.1 locus=Mapoly0131s0006 ID=Mapoly0131s0006.1.v3.1 annot-version=v3.1	-60.5848	0.375	32704.2	288	37	37	11	11	15	13	1.15385	13.251	1	7
b90	b90.a1	b90.a1.a1	Mapoly0014s0058.1.p	pacid=33015537 transcript=Mapoly0014s0058.1 locus=Mapoly0014s0058 ID=Mapoly0014s0058.1.v3.1 annot-version=v3.1	-84.3787	0.34204	45346.4	421	35	35	13	13	15	19	0.789474	5.15848	1	9
b91	b91.a1	b91.a1.a1	Mapoly0024s0116.1.p	pacid=33023154 transcript=Mapoly0024s0116.1 locus=Mapoly0024s0116 ID=Mapoly0024s0116.1.v3.1 annot-version=v3.1	-61.1909	0.27902	49276.8	448	32	5	11	2	15	20	0.75	4.62341	2	9
b91	b91.a1	b91.a1.a2	Mapoly0024s0116.2.p	pacid=33023155 transcript=Mapoly0024s0116.2 locus=Mapoly0024s0116 ID=Mapoly0024s0116.2.v3.1 annot-version=v3.1	-61.1909	0.27902	49276.8	448	32	5	11	2	15	20	0.75	4.62341	2	9
b91	b91.a2	b91.a2.a1	Mapoly0052s0109.1.p	pacid=33026800 transcript=Mapoly0052s0109.1 locus=Mapoly0052s0109 ID=Mapoly0052s0109.1.v3.1 annot-version=v3.1	-54.3396	0.26116	49263.7	448	29	2	10	1	14	20	0.7	4.01187	1	9
b91	b91.a3	b91.a3.a1	Mapoly0002s0240.1.p	pacid=33023413 transcript=Mapoly0002s0240.1 locus=Mapoly0002s0240 ID=Mapoly0002s0240.1.v3.1 annot-version=v3.1	-46.0472	0.19196	49255.7	448	26	1	9	1	11	20	0.55	2.54813	1	9
b91	b91.a4	b91.a4.a1	Mapoly0145s0015.1.p	pacid=33019135 transcript=Mapoly0145s0015.1 locus=Mapoly0145s0015 ID=Mapoly0145s0015.1.v3.1 annot-version=v3.1	-19.7513	0.09795	48073	439	17	3	6	1	8	16	0.5	2.16228	1	9
b92	b92.a1	b92.a1.a1	Mapoly0035s0059.1.p	pacid=33026274 transcript=Mapoly0035s0059.1 locus=Mapoly0035s0059 ID=Mapoly0035s0059.1.v3.1 annot-version=v3.1	-51.6269	0.21491	76316.7	684	18	12	13	9	13	32	0.40625	1.5483	1	4
b92	b92.a2	b92.a2.a1	Mapoly0005s0120.1.p	pacid=33003461 transcript=Mapoly0005s0120.1 locus=Mapoly0005s0120 ID=Mapoly0005s0120.1.v3.1 annot-version=v3.1	-31.3833	0.21739	33292.8	299	11	5	6	2	7	11	0.636364	3.32876	1	4
b93	b93.a1	b93.a1.a1	Mapoly0057s0094.1.p	pacid=33011808 transcript=Mapoly0057s0094.1 locus=Mapoly0057s0094 ID=Mapoly0057s0094.1.v3.1 annot-version=v3.1	-77.6629	0.27928	36483.9	333	78	78	10	10	17	12	1.41667	25.1016	1	9
b94	b94.a1	b94.a1.a1	Mapoly0127s0004.1.p	pacid=33009169 transcript=Mapoly0127s0004.1 locus=Mapoly0127s0004 ID=Mapoly0127s0004.1.v3.1 annot-version=v3.1	-85.4672	0.23684	45607.6	418	57	48	10	8	14	12	1.16667	13.678	1	9
b94	b94.a2	b94.a2.a1	Mapoly0048s0057.1.p	pacid=33011346 transcript=Mapoly0048s0057.1 locus=Mapoly0048s0057 ID=Mapoly0048s0057.1.v3.1 annot-version=v3.1	-29.762	0.1182	46052.8	423	18	9	5	3	6	10	0.6	2.98107	1	8
b95	b95.a1	b95.a1.a1	Mapoly0047s0075.1.p	pacid=33013962 transcript=Mapoly0047s0075.1 locus=Mapoly0047s0075 ID=Mapoly0047s0075.1.v3.1 annot-version=v3.1	-65.0508	0.15083	88175.6	842	47	47	9	9	13	16	0.8125	5.49382	1	9
b96	b96.a1	b96.a1.a1	Mapoly0027s0081.1.p	pacid=33021383 transcript=Mapoly0027s0081.1 locus=Mapoly0027s0081 ID=Mapoly0027s0081.1.v3.1 annot-version=v3.1	-58.1242	0.23274	40614	391	39	39	9	9	12	7	1.71429	50.7947	2	9
b96	b96.a1	b96.a1.a2	Mapoly0027s0084.1.p	pacid=33021424 transcript=Mapoly0027s0084.1 locus=Mapoly0027s0084 ID=Mapoly0027s0084.1.v3.1 annot-version=v3.1	-58.1242	0.23274	40614	391	39	39	9	9	12	7	1.71429	50.7947	2	9
b97	b97.a1	b97.a1.a1	Mapoly0029s0125.1.p	pacid=33014673 transcript=Mapoly0029s0125.1 locus=Mapoly0029s0125 ID=Mapoly0029s0125.1.v3.1 annot-version=v3.1	-71.3918	0.3219	41232.5	379	29	29	10	10	13	19	0.684211	3.83293	1	9
b98	b98.a1	b98.a1.a1	Mapoly0016s0091.1.p	pacid=33026954 transcript=Mapoly0016s0091.1 locus=Mapoly0016s0091 ID=Mapoly0016s0091.1.v3.1 annot-version=v3.1	-52.5053	0.42236	17916.6	161	28	28	10	10	14	8	1.75	55.2341	2	6
b98	b98.a1	b98.a1.a2	Mapoly0020s0099.1.p	pacid=33004214 transcript=Mapoly0020s0099.1 locus=Mapoly0020s0099 ID=Mapoly0020s0099.1.v3.1 annot-version=v3.1	-52.5053	0.42236	17902.6	161	28	28	10	10	14	8	1.75	55.2341	2	6
b99	b99.a1	b99.a1.a1	Mapoly0014s0127.1.p	pacid=33015305 transcript=Mapoly0014s0127.1 locus=Mapoly0014s0127 ID=Mapoly0014s0127.1.v3.1 annot-version=v3.1	-67.8826	0.25167	47775.3	449	28	28	10	10	13	15	0.866667	6.35642	1	4
c100	c100.a1	c100.a1.a1	Mapoly0040s0009.1.p	pacid=33020761 transcript=Mapoly0040s0009.1 locus=Mapoly0040s0009 ID=Mapoly0040s0009.1.v3.1 annot-version=v3.1	-60.5487	0.17059	56072.9	510	45	45	9	9	11	22	0.5	2.16228	1	8
c101	c101.a1	c101.a1.a1	Mapoly0056s0040.1.p	pacid=33013138 transcript=Mapoly0056s0040.1 locus=Mapoly0056s0040 ID=Mapoly0056s0040.1.v3.1 annot-version=v3.1	-99.2918	0.46667	33965	330	45	45	10	10	12	17	0.705882	4.08022	1	9
c102	c102.a1	c102.a1.a1	Mapoly0010s0210.1.p	pacid=33022028 transcript=Mapoly0010s0210.1 locus=Mapoly0010s0210 ID=Mapoly0010s0210.1.v3.1 annot-version=v3.1	-53.9588	0.35577	11436.4	104	40	40	7	7	17	5	3.4	2510.89	8	9
c102	c102.a1	c102.a1.a2	Mapoly0010s0211.1.p	pacid=33021849 transcript=Mapoly0010s0211.1 locus=Mapoly0010s0211 ID=Mapoly0010s0211.1.v3.1 annot-version=v3.1	-53.9588	0.35577	11436.4	104	40	40	7	7	17	5	3.4	2510.89	8	9
c102	c102.a1	c102.a1.a3	Mapoly0010s0212.1.p	pacid=33022004 transcript=Mapoly0010s0212.1 locus=Mapoly0010s0212 ID=Mapoly0010s0212.1.v3.1 annot-version=v3.1	-53.9588	0.35577	11436.4	104	40	40	7	7	17	5	3.4	2510.89	8	9
c102	c102.a1	c102.a1.a4	Mapoly0117s0022.1.p	pacid=33027507 transcript=Mapoly0117s0022.1 locus=Mapoly0117s0022 ID=Mapoly0117s0022.1.v3.1 annot-version=v3.1	-53.9588	0.35577	11436.4	104	40	40	7	7	17	5	3.4	2510.89	8	9
c102	c102.a1	c102.a1.a5	Mapoly0172s0017.1.p	pacid=33024291 transcript=Mapoly0172s0017.1 locus=Mapoly0172s0017 ID=Mapoly0172s0017.1.v3.1 annot-version=v3.1	-53.9588	0.35577	11436.4	104	40	40	7	7	17	5	3.4	2510.89	8	9
c102	c102.a1	c102.a1.a6	Mapoly0172s0018.1.p	pacid=33024304 transcript=Mapoly0172s0018.1 locus=Mapoly0172s0018 ID=Mapoly0172s0018.1.v3.1 annot-version=v3.1	-53.9588	0.35577	11436.4	104	40	40	7	7	17	5	3.4	2510.89	8	9
c102	c102.a1	c102.a1.a7	Mapoly0214s0009.1.p	pacid=33016401 transcript=Mapoly0214s0009.1 locus=Mapoly0214s0009 ID=Mapoly0214s0009.1.v3.1 annot-version=v3.1	-53.9588	0.35577	11436.4	104	40	40	7	7	17	5	3.4	2510.89	8	9
c102	c102.a1	c102.a1.a8	Mapoly0214s0010.1.p	pacid=33016407 transcript=Mapoly0214s0010.1 locus=Mapoly0214s0010 ID=Mapoly0214s0010.1.v3.1 annot-version=v3.1	-53.9588	0.35577	11436.4	104	40	40	7	7	17	5	3.4	2510.89	8	9
c103	c103.a1	c103.a1.a1	Mapoly0026s0074.1.p	pacid=33024389 transcript=Mapoly0026s0074.1 locus=Mapoly0026s0074 ID=Mapoly0026s0074.1.v3.1 annot-version=v3.1	-81.1092	0.21088	63426.1	588	39	39	9	9	12	24	0.5	2.16228	1	8
c104	c104.a1	c104.a1.a1	Mapoly0015s0122.1.p	pacid=33019339 transcript=Mapoly0015s0122.1 locus=Mapoly0015s0122 ID=Mapoly0015s0122.1.v3.1 annot-version=v3.1	-73.6767	0.24	57643.5	525	36	36	10	10	15	26	0.576923	2.77505	1	7
c105	c105.a1	c105.a1.a1	Mapoly0054s0045.1.p	pacid=33017383 transcript=Mapoly0054s0045.1 locus=Mapoly0054s0045 ID=Mapoly0054s0045.1.v3.1 annot-version=v3.1	-75.6982	0.37288	33601.5	295	32	32	11	11	14	9	1.55556	34.9381	1	6
c106	c106.a1	c106.a1.a1	Mapoly0058s0025.1.p	pacid=33022946 transcript=Mapoly0058s0025.1 locus=Mapoly0058s0025 ID=Mapoly0058s0025.1.v3.1 annot-version=v3.1	-54.7279	0.16502	63609.9	606	25	25	10	10	11	27	0.407407	1.5551	1	6
c107	c107.a1	c107.a1.a1	Mapoly0062s0115.1.p	pacid=33016788 transcript=Mapoly0062s0115.1 locus=Mapoly0062s0115 ID=Mapoly0062s0115.1.v3.1 annot-version=v3.1	-76.1745	0.33255	47156	424	22	22	10	10	12	22	0.545455	2.51119	1	4
c108	c108.a1	c108.a1.a1	Mapoly0023s0027.1.p	pacid=33014076 transcript=Mapoly0023s0027.1 locus=Mapoly0023s0027 ID=Mapoly0023s0027.1.v3.1 annot-version=v3.1	-65.1083	0.0877	177909	1642	19	19	11	11	11	64	0.171875	0.485508	1	6
c109	c109.a1	c109.a1.a1	Mapoly0069s0006.1.p	pacid=33018785 transcript=Mapoly0069s0006.1 locus=Mapoly0069s0006 ID=Mapoly0069s0006.1.v3.1 annot-version=v3.1	-57.5592	0.20165	53273.8	486	19	19	10	10	12	18	0.666667	3.64159	1	4
c110	c110.a1	c110.a1.a1	Mapoly0036s0083.2.p	pacid=33024198 transcript=Mapoly0036s0083.2 locus=Mapoly0036s0083 ID=Mapoly0036s0083.2.v3.1 annot-version=v3.1	-72.3298	0.65455	11431.9	110	93	93	7	7	15	6	2.5	315.228	1	9
c111	c111.a1	c111.a1.a1	Mapoly0099s0052.1.p	pacid=33024991 transcript=Mapoly0099s0052.1 locus=Mapoly0099s0052 ID=Mapoly0099s0052.1.v3.1 annot-version=v3.1	-89.7141	0.24189	37676.7	339	89	89	7	7	16	10	1.6	38.8107	1	9
c112	c112.a1	c112.a1.a1	Mapoly0154s0011.1.p	pacid=33016016 transcript=Mapoly0154s0011.1 locus=Mapoly0154s0011 ID=Mapoly0154s0011.1.v3.1 annot-version=v3.1	-54.1154	0.47337	18192.3	169	80	70	7	5	15	6	2.5	315.228	1	9
c112	c112.a2	c112.a2.a1	Mapoly0078s0052.1.p	pacid=33010743 transcript=Mapoly0078s0052.1 locus=Mapoly0078s0052 ID=Mapoly0078s0052.1.v3.1 annot-version=v3.1	-41.7555	0.25556	29816.3	270	50	40	6	4	12	13	0.923077	7.37678	1	9
c113	c113.a1	c113.a1.a1	Mapoly0084s0065.1.p	pacid=33025735 transcript=Mapoly0084s0065.1 locus=Mapoly0084s0065 ID=Mapoly0084s0065.1.v3.1 annot-version=v3.1	-68.3417	0.18336	56657.8	529	68	68	7	7	12	11	1.09091	11.3285	1	9
c114	c114.a1	c114.a1.a1	Mapoly0049s0002.1.p	pacid=33009300 transcript=Mapoly0049s0002.1 locus=Mapoly0049s0002 ID=Mapoly0049s0002.1.v3.1 annot-version=v3.1	-76.5264	0.15474	65854.5	601	55	51	7	6	14	11	1.27273	17.7382	1	9
c114	c114.a2	c114.a2.a1	Mapoly0055s0071.1.p	pacid=33010547 transcript=Mapoly0055s0071.1 locus=Mapoly0055s0071 ID=Mapoly0055s0071.1.v3.1 annot-version=v3.1	-47.4298	0.40865	23596.1	208	18	10	8	5	8	9	0.888889	6.74264	1	5
c114	c114.a3	c114.a3.a1	Mapoly0005s0116.1.p	pacid=33003443 transcript=Mapoly0005s0116.1 locus=Mapoly0005s0116 ID=Mapoly0005s0116.1.v3.1 annot-version=v3.1	-26.449	0.26794	23648.1	209	16	8	6	3	7	7	1	9	1	6
c115	c115.a1	c115.a1.a1	Mapoly0155s0011.1.p	pacid=33019149 transcript=Mapoly0155s0011.1 locus=Mapoly0155s0011 ID=Mapoly0155s0011.1.v3.1 annot-version=v3.1	-63.491	0.25786	34217.3	318	55	55	7	7	13	10	1.3	18.9526	1	9
c116	c116.a1	c116.a1.a1	Mapoly0010s0214.1.p	pacid=33022079 transcript=Mapoly0010s0214.1 locus=Mapoly0010s0214 ID=Mapoly0010s0214.1.v3.1 annot-version=v3.1	-71.0992	0.22871	42716.1	411	47	47	8	8	14	6	2.33333	214.443	1	9
c117	c117.a1	c117.a1.a1	Mapoly0076s0069.1.p	pacid=33016300 transcript=Mapoly0076s0069.1 locus=Mapoly0076s0069 ID=Mapoly0076s0069.1.v3.1 annot-version=v3.1	-47.5953	0.24074	40725.1	378	44	44	7	7	11	9	1.22222	15.681	1	9
c118	c118.a1	c118.a1.a1	Mapoly0217s0009.1.p	pacid=33013751 transcript=Mapoly0217s0009.1 locus=Mapoly0217s0009 ID=Mapoly0217s0009.1.v3.1 annot-version=v3.1	-55.4532	0.16216	65767.8	592	44	44	8	8	11	12	0.916667	7.25404	1	9
c119	c119.a1	c119.a1.a1	Mapoly0009s0072.1.p	pacid=33017182 transcript=Mapoly0009s0072.1 locus=Mapoly0009s0072 ID=Mapoly0009s0072.1.v3.1 annot-version=v3.1	-66.4551	0.22605	57407.5	522	42	42	8	8	11	13	0.846154	6.01704	5	8
c119	c119.a1	c119.a1.a2	Mapoly0009s0072.2.p	pacid=33017183 transcript=Mapoly0009s0072.2 locus=Mapoly0009s0072 ID=Mapoly0009s0072.2.v3.1 annot-version=v3.1	-66.4551	0.22605	57407.5	522	42	42	8	8	11	13	0.846154	6.01704	5	8
c119	c119.a1	c119.a1.a3	Mapoly0009s0072.3.p	pacid=33017185 transcript=Mapoly0009s0072.3 locus=Mapoly0009s0072 ID=Mapoly0009s0072.3.v3.1 annot-version=v3.1	-66.4551	0.23984	53532.7	492	42	42	8	8	11	11	1	9	5	8
c119	c119.a1	c119.a1.a4	Mapoly0009s0072.4.p	pacid=33017186 transcript=Mapoly0009s0072.4 locus=Mapoly0009s0072 ID=Mapoly0009s0072.4.v3.1 annot-version=v3.1	-66.4551	0.23984	53532.7	492	42	42	8	8	11	11	1	9	5	8
c119	c119.a1	c119.a1.a5	Mapoly0009s0072.5.p	pacid=33017184 transcript=Mapoly0009s0072.5 locus=Mapoly0009s0072 ID=Mapoly0009s0072.5.v3.1 annot-version=v3.1	-66.4551	0.23984	53532.7	492	42	42	8	8	11	11	1	9	5	8
c120	c120.a1	c120.a1.a1	Mapoly0117s0014.1.p	pacid=33027488 transcript=Mapoly0117s0014.1 locus=Mapoly0117s0014 ID=Mapoly0117s0014.1.v3.1 annot-version=v3.1	-36.024	0.2809	19383.7	178	42	36	6	3	10	6	1.66667	45.4159	1	9
c120	c120.a2	c120.a2.a1	Mapoly0117s0017.1.p	pacid=33027497 transcript=Mapoly0117s0017.1 locus=Mapoly0117s0017 ID=Mapoly0117s0017.1.v3.1 annot-version=v3.1	-21.3099	0.20765	19922	183	19	16	4	2	6	7	0.857143	6.19686	1	8
c120	c120.a3	c120.a3.a1	Mapoly0117s0015.1.p	pacid=33027562 transcript=Mapoly0117s0015.1 locus=Mapoly0117s0015 ID=Mapoly0117s0015.1.v3.1 annot-version=v3.1	-19.8109	0.21429	19943.2	182	11	8	3	2	4	5	0.8	5.30957	1	6
c121	c121.a1	c121.a1.a1	Mapoly0116s0033.1.p	pacid=33023686 transcript=Mapoly0116s0033.1 locus=Mapoly0116s0033 ID=Mapoly0116s0033.1.v3.1 annot-version=v3.1	-67.9376	0.27901	44575.2	405	38	38	9	9	13	15	0.866667	6.35642	3	7
c121	c121.a1	c121.a1.a2	Mapoly0116s0033.2.p	pacid=33023688 transcript=Mapoly0116s0033.2 locus=Mapoly0116s0033 ID=Mapoly0116s0033.2.v3.1 annot-version=v3.1	-67.9376	0.27901	44575.2	405	38	38	9	9	13	15	0.866667	6.35642	3	7
c121	c121.a1	c121.a1.a3	Mapoly0116s0033.3.p	pacid=33023687 transcript=Mapoly0116s0033.3 locus=Mapoly0116s0033 ID=Mapoly0116s0033.3.v3.1 annot-version=v3.1	-67.9376	0.27901	44575.2	405	38	38	9	9	13	15	0.866667	6.35642	3	7
c122	c122.a1	c122.a1.a1	Mapoly0008s0198.1.p	pacid=33026464 transcript=Mapoly0008s0198.1 locus=Mapoly0008s0198 ID=Mapoly0008s0198.1.v3.1 annot-version=v3.1	-69.9474	0.14112	101201	907	36	36	9	9	13	24	0.541667	2.4807	1	9
c123	c123.a1	c123.a1.a1	Mapoly0160s0014.1.p	pacid=33018613 transcript=Mapoly0160s0014.1 locus=Mapoly0160s0014 ID=Mapoly0160s0014.1.v3.1 annot-version=v3.1	-54.4871	0.37991	24526.7	229	36	36	7	7	12	10	1.2	14.8489	1	8
c124	c124.a1	c124.a1.a1	Mapoly0212s0013.1.p	pacid=33010684 transcript=Mapoly0212s0013.1 locus=Mapoly0212s0013 ID=Mapoly0212s0013.1.v3.1 annot-version=v3.1	-61.991	0.32584	39218.5	356	33	33	10	10	11	18	0.611111	3.08424	1	9
c125	c125.a1	c125.a1.a1	Mapoly0087s0010.1.p	pacid=33025631 transcript=Mapoly0087s0010.1 locus=Mapoly0087s0010 ID=Mapoly0087s0010.1.v3.1 annot-version=v3.1	-60.4463	0.26708	34752	322	30	30	8	8	11	9	1.22222	15.681	1	8
c126	c126.a1	c126.a1.a1	Mapoly0030s0103.1.p	pacid=33006856 transcript=Mapoly0030s0103.1 locus=Mapoly0030s0103 ID=Mapoly0030s0103.1.v3.1 annot-version=v3.1	-56.2641	0.21429	59002.3	546	23	23	10	10	11	26	0.423077	1.64897	1	6
c127	c127.a1	c127.a1.a1	Mapoly0155s0015.1.p	pacid=33019173 transcript=Mapoly0155s0015.1 locus=Mapoly0155s0015 ID=Mapoly0155s0015.1.v3.1 annot-version=v3.1	-38.5143	0.20604	39707.1	364	23	12	7	4	10	12	0.833333	5.81292	1	8
c127	c127.a2	c127.a2.a1	Mapoly0003s0156.1.p	pacid=33010182 transcript=Mapoly0003s0156.1 locus=Mapoly0003s0156 ID=Mapoly0003s0156.1.v3.1 annot-version=v3.1	-27.3242	0.19231	39927.2	364	17	6	6	3	8	13	0.615385	3.12463	1	6
c128	c128.a1	c128.a1.a1	Mapoly1294s0001.1.p	pacid=33021255 transcript=Mapoly1294s0001.1 locus=Mapoly1294s0001 ID=Mapoly1294s0001.1.v3.1 annot-version=v3.1	-61.9976	0.22908	55414.6	502	23	18	9	8	11	19	0.578947	2.79269	1	5
c128	c128.a2	c128.a2.a1	Mapoly0002s0002.1.p	pacid=33023267 transcript=Mapoly0002s0002.1 locus=Mapoly0002s0002 ID=Mapoly0002s0002.1.v3.1 annot-version=v3.1	-33.9965	0.26563	20479.5	192	9	4	3	2	4	7	0.571429	2.72759	1	4
c129	c129.a1	c129.a1.a1	Mapoly0088s0036.1.p	pacid=33012003 transcript=Mapoly0088s0036.1 locus=Mapoly0088s0036 ID=Mapoly0088s0036.1.v3.1 annot-version=v3.1	-57.6292	0.13152	97855.7	920	22	22	9	9	10	18	0.555556	2.59381	1	4
c130	c130.a1	c130.a1.a1	Mapoly0113s0014.1.p	pacid=33005117 transcript=Mapoly0113s0014.1 locus=Mapoly0113s0014 ID=Mapoly0113s0014.1.v3.1 annot-version=v3.1	-47.4759	0.15747	82279.6	743	17	17	9	9	10	23	0.434783	1.72134	4	6
c130	c130.a1	c130.a1.a2	Mapoly0113s0014.2.p	pacid=33005118 transcript=Mapoly0113s0014.2 locus=Mapoly0113s0014 ID=Mapoly0113s0014.2.v3.1 annot-version=v3.1	-47.4759	0.1594	81339.1	734	17	17	9	9	10	23	0.434783	1.72134	4	6
c130	c130.a1	c130.a1.a3	Mapoly0113s0014.3.p	pacid=33005120 transcript=Mapoly0113s0014.3 locus=Mapoly0113s0014 ID=Mapoly0113s0014.3.v3.1 annot-version=v3.1	-47.4759	0.19631	66019.4	596	17	17	9	9	10	20	0.5	2.16228	4	6
c130	c130.a1	c130.a1.a4	Mapoly0113s0014.4.p	pacid=33005119 transcript=Mapoly0113s0014.4 locus=Mapoly0113s0014 ID=Mapoly0113s0014.4.v3.1 annot-version=v3.1	-47.4759	0.17863	72594	655	17	17	9	9	10	21	0.47619	1.99358	4	6
c131	c131.a1	c131.a1.a1	Mapoly0045s0097.1.p	pacid=33015185 transcript=Mapoly0045s0097.1 locus=Mapoly0045s0097 ID=Mapoly0045s0097.1.v3.1 annot-version=v3.1	-61.6992	0.07575	192445	1703	14	14	10	10	10	68	0.147059	0.403004	1	3
c132	c132.a1	c132.a1.a1	Mapoly0081s0081.1.p	pacid=33018994 transcript=Mapoly0081s0081.1 locus=Mapoly0081s0081 ID=Mapoly0081s0081.1.v3.1 annot-version=v3.1	-76.1855	0.21053	45218.6	418	56	56	8	8	13	9	1.44444	26.8256	1	9
c133	c133.a1	c133.a1.a1	Mapoly0177s0014.1.p	pacid=33003537 transcript=Mapoly0177s0014.1 locus=Mapoly0177s0014 ID=Mapoly0177s0014.1.v3.1 annot-version=v3.1	-48.6687	0.2459	34610.6	305	51	51	5	5	10	10	1	9	2	9
c133	c133.a1	c133.a1.a2	Mapoly0177s0015.1.p	pacid=33003531 transcript=Mapoly0177s0015.1 locus=Mapoly0177s0015 ID=Mapoly0177s0015.1.v3.1 annot-version=v3.1	-48.6687	0.24834	34359.4	302	51	51	5	5	10	9	1.11111	11.9155	2	9
c134	c134.a1	c134.a1.a1	Mapoly0104s0030.1.p	pacid=33012537 transcript=Mapoly0104s0030.1 locus=Mapoly0104s0030 ID=Mapoly0104s0030.1.v3.1 annot-version=v3.1	-41.8674	0.22443	37391.1	352	50	50	6	6	11	5	2.2	157.489	1	9
c135	c135.a1	c135.a1.a1	Mapoly0016s0046.1.p	pacid=33027041 transcript=Mapoly0016s0046.1 locus=Mapoly0016s0046 ID=Mapoly0016s0046.1.v3.1 annot-version=v3.1	-68.7415	0.18787	54278.8	511	49	49	9	9	11	13	0.846154	6.01704	1	9
c136	c136.a1	c136.a1.a1	Mapoly0127s0010.1.p	pacid=33009141 transcript=Mapoly0127s0010.1 locus=Mapoly0127s0010 ID=Mapoly0127s0010.1.v3.1 annot-version=v3.1	-47.6758	0.14211	63375.1	570	49	49	7	7	11	16	0.6875	3.86968	1	9
c137	c137.a1	c137.a1.a1	Mapoly0226s0003.1.p	pacid=33016067 transcript=Mapoly0226s0003.1 locus=Mapoly0226s0003 ID=Mapoly0226s0003.1.v3.1 annot-version=v3.1	-52.6495	0.20443	44199.2	406	49	49	8	8	10	17	0.588235	2.87468	1	9
c138	c138.a1	c138.a1.a1	Mapoly0061s0025.1.p	pacid=33025980 transcript=Mapoly0061s0025.1 locus=Mapoly0061s0025 ID=Mapoly0061s0025.1.v3.1 annot-version=v3.1	-50.6049	0.20942	40761.3	382	44	44	6	6	10	13	0.769231	4.87802	1	9
c139	c139.a1	c139.a1.a1	Mapoly0001s0216.1.p	pacid=33020484 transcript=Mapoly0001s0216.1 locus=Mapoly0001s0216 ID=Mapoly0001s0216.1.v3.1 annot-version=v3.1	-30.9641	0.24227	19220.7	194	43	17	4	3	13	12	1.08333	11.1153	1	7
c139	c139.a2	c139.a2.a1	Mapoly0069s0062.1.p	pacid=33018834 transcript=Mapoly0069s0062.1 locus=Mapoly0069s0062 ID=Mapoly0069s0062.1.v3.1 annot-version=v3.1	-25.1765	0.25134	18114.3	187	39	13	4	3	10	9	1.11111	11.9155	1	6
c140	c140.a1	c140.a1.a1	Mapoly0026s0085.1.p	pacid=33024521 transcript=Mapoly0026s0085.1 locus=Mapoly0026s0085 ID=Mapoly0026s0085.1.v3.1 annot-version=v3.1	-59.8942	0.37073	22406.2	205	40	40	8	8	11	10	1.1	11.5893	2	7
c140	c140.a1	c140.a1.a2	Mapoly0026s0085.2.p	pacid=33024522 transcript=Mapoly0026s0085.2 locus=Mapoly0026s0085 ID=Mapoly0026s0085.2.v3.1 annot-version=v3.1	-59.8942	0.51351	16597.3	148	40	40	8	8	11	6	1.83333	67.1292	2	7
c141	c141.a1	c141.a1.a1	Mapoly0005s0150.1.p	pacid=33003240 transcript=Mapoly0005s0150.1 locus=Mapoly0005s0150 ID=Mapoly0005s0150.1.v3.1 annot-version=v3.1	-81.2529	0.15366	93897.3	846	38	38	9	9	11	37	0.297297	0.982884	1	9
c142	c142.a1	c142.a1.a1	Mapoly0053s0082.1.p	pacid=33014963 transcript=Mapoly0053s0082.1 locus=Mapoly0053s0082 ID=Mapoly0053s0082.1.v3.1 annot-version=v3.1	-42.5548	0.20301	42718.9	399	36	36	6	6	9	16	0.5625	2.65174	1	9
c143	c143.a1	c143.a1.a1	Mapoly4078s0001.1.p	pacid=33010232 transcript=Mapoly4078s0001.1 locus=Mapoly4078s0001 ID=Mapoly4078s0001.1.v3.1 annot-version=v3.1	-55.9076	0.21294	41117.5	371	32	32	6	6	12	14	0.857143	6.19686	1	8
c144	c144.a1	c144.a1.a1	Mapoly0012s0119.1.p	pacid=33017605 transcript=Mapoly0012s0119.1 locus=Mapoly0012s0119 ID=Mapoly0012s0119.1.v3.1 annot-version=v3.1	-53.1019	0.33333	29415.8	264	30	30	9	9	10	13	0.769231	4.87802	2	6
c144	c144.a1	c144.a1.a2	Mapoly0012s0120.1.p	pacid=33017589 transcript=Mapoly0012s0120.1 locus=Mapoly0012s0120 ID=Mapoly0012s0120.1.v3.1 annot-version=v3.1	-53.1019	0.33333	29415.8	264	30	30	9	9	10	13	0.769231	4.87802	2	6
c145	c145.a1	c145.a1.a1	Mapoly0125s0005.1.p	pacid=33016443 transcript=Mapoly0125s0005.1 locus=Mapoly0125s0005 ID=Mapoly0125s0005.1.v3.1 annot-version=v3.1	-53.4681	0.18256	56473	493	24	18	8	6	10	18	0.555556	2.59381	1	7
c145	c145.a2	c145.a2.a1	Mapoly0127s0052.1.p	pacid=33009138 transcript=Mapoly0127s0052.1 locus=Mapoly0127s0052 ID=Mapoly0127s0052.1.v3.1 annot-version=v3.1	-17.9224	0.07661	57255.2	496	7	1	3	1	4	18	0.222222	0.668101	1	3
c146	c146.a1	c146.a1.a1	Mapoly0082s0043.1.p	pacid=33004634 transcript=Mapoly0082s0043.1 locus=Mapoly0082s0043 ID=Mapoly0082s0043.1.v3.1 annot-version=v3.1	-55.2467	0.20071	60279.4	563	22	22	8	8	9	27	0.333333	1.15443	1	9
c147	c147.a1	c147.a1.a1	Mapoly0025s0022.1.p	pacid=33027311 transcript=Mapoly0025s0022.1 locus=Mapoly0025s0022 ID=Mapoly0025s0022.1.v3.1 annot-version=v3.1	-44.3426	0.23096	42731.6	394	21	21	7	7	9	14	0.642857	3.39397	1	6
c148	c148.a1	c148.a1.a1	Mapoly0030s0100.1.p	pacid=33006747 transcript=Mapoly0030s0100.1 locus=Mapoly0030s0100 ID=Mapoly0030s0100.1.v3.1 annot-version=v3.1	-49.4561	0.33333	29725.7	264	21	5	9	3	11	12	0.916667	7.25404	1	7
c148	c148.a2	c148.a2.a1	Mapoly0072s0006.1.p	pacid=33008652 transcript=Mapoly0072s0006.1 locus=Mapoly0072s0006 ID=Mapoly0072s0006.1.v3.1 annot-version=v3.1	-41.6783	0.30682	29698.6	264	19	3	8	2	10	12	0.833333	5.81292	1	7
c149	c149.a1	c149.a1.a1	Mapoly0108s0005.1.p	pacid=33021761 transcript=Mapoly0108s0005.1 locus=Mapoly0108s0005 ID=Mapoly0108s0005.1.v3.1 annot-version=v3.1	-47.5543	0.20868	53037.1	484	20	7	8	3	9	18	0.5	2.16228	1	4
c149	c149.a2	c149.a2.a1	Mapoly1179s0001.1.p	pacid=33011323 transcript=Mapoly1179s0001.1 locus=Mapoly1179s0001 ID=Mapoly1179s0001.1.v3.1 annot-version=v3.1	-47.3029	0.35685	27419.9	241	16	3	7	2	8	13	0.615385	3.12463	1	4
c150	c150.a1	c150.a1.a1	Mapoly0162s0016.1.p	pacid=33011953 transcript=Mapoly0162s0016.1 locus=Mapoly0162s0016 ID=Mapoly0162s0016.1.v3.1 annot-version=v3.1	-30.419	0.13211	59801.5	545	18	18	7	7	10	18	0.555556	2.59381	2	5
c150	c150.a1	c150.a1.a2	Mapoly0162s0016.2.p	pacid=33011954 transcript=Mapoly0162s0016.2 locus=Mapoly0162s0016 ID=Mapoly0162s0016.2.v3.1 annot-version=v3.1	-30.419	0.13211	59801.5	545	18	18	7	7	10	18	0.555556	2.59381	2	5
c151	c151.a1	c151.a1.a1	Mapoly0060s0013.1.p	pacid=33018370 transcript=Mapoly0060s0013.1 locus=Mapoly0060s0013 ID=Mapoly0060s0013.1.v3.1 annot-version=v3.1	-72.2396	0.19366	60847.1	568	15	15	9	9	10	27	0.37037	1.34623	1	3
c152	c152.a1	c152.a1.a1	Mapoly0062s0041.1.p	pacid=33016758 transcript=Mapoly0062s0041.1 locus=Mapoly0062s0041 ID=Mapoly0062s0041.1.v3.1 annot-version=v3.1	-54.6216	0.28342	41165.7	374	15	15	9	9	9	23	0.391304	1.46209	1	5
c153	c153.a1	c153.a1.a1	Mapoly0041s0092.1.p	pacid=33005088 transcript=Mapoly0041s0092.1 locus=Mapoly0041s0092 ID=Mapoly0041s0092.1.v3.1 annot-version=v3.1	-49.014	0.1382	79820.5	767	12	12	9	9	9	18	0.5	2.16228	1	3
c154	c154.a1	c154.a1.a1	Mapoly0099s0059.1.p	pacid=33024994 transcript=Mapoly0099s0059.1 locus=Mapoly0099s0059 ID=Mapoly0099s0059.1.v3.1 annot-version=v3.1	-65.5076	0.26437	28140.8	261	58	24	7	2	14	8	1.75	55.2341	1	9
c154	c154.a2	c154.a2.a1	Mapoly0068s0027.1.p	pacid=33024855 transcript=Mapoly0068s0027.1 locus=Mapoly0068s0027 ID=Mapoly0068s0027.1.v3.1 annot-version=v3.1	-58.8699	0.26437	28092.8	261	44	10	7	2	12	8	1.5	30.6228	1	8
c155	c155.a1	c155.a1.a1	Mapoly0072s0046.1.p	pacid=33008555 transcript=Mapoly0072s0046.1 locus=Mapoly0072s0046 ID=Mapoly0072s0046.1.v3.1 annot-version=v3.1	-48.7744	0.16242	35128.1	314	46	46	7	7	10	6	1.66667	45.4159	1	9
c156	c156.a1	c156.a1.a1	Mapoly0002s0205.1.p	pacid=33023624 transcript=Mapoly0002s0205.1 locus=Mapoly0002s0205 ID=Mapoly0002s0205.1.v3.1 annot-version=v3.1	-36.1747	0.10142	52655.6	493	44	44	4	4	8	15	0.533333	2.41455	2	9
c156	c156.a1	c156.a1.a2	Mapoly0002s0205.2.p	pacid=33023625 transcript=Mapoly0002s0205.2 locus=Mapoly0002s0205 ID=Mapoly0002s0205.2.v3.1 annot-version=v3.1	-36.1747	0.11933	45204.8	419	44	44	4	4	8	15	0.533333	2.41455	2	9
c157	c157.a1	c157.a1.a1	Mapoly0046s0063.1.p	pacid=33006506 transcript=Mapoly0046s0063.1 locus=Mapoly0046s0063 ID=Mapoly0046s0063.1.v3.1 annot-version=v3.1	-71.3138	0.1938	42153.8	387	42	42	6	6	10	9	1.11111	11.9155	1	9
c158	c158.a1	c158.a1.a1	Mapoly0118s0037.1.p	pacid=33019608 transcript=Mapoly0118s0037.1 locus=Mapoly0118s0037 ID=Mapoly0118s0037.1.v3.1 annot-version=v3.1	-48.37	0.38298	21053.6	188	41	41	7	7	9	7	1.28571	18.307	1	7
c159	c159.a1	c159.a1.a1	Mapoly0122s0034.1.p	pacid=33014815 transcript=Mapoly0122s0034.1 locus=Mapoly0122s0034 ID=Mapoly0122s0034.1.v3.1 annot-version=v3.1	-50.1961	0.41364	24766.3	220	36	36	8	8	10	9	1.11111	11.9155	2	8
c159	c159.a1	c159.a1.a2	Mapoly0122s0034.2.p	pacid=33014816 transcript=Mapoly0122s0034.2 locus=Mapoly0122s0034 ID=Mapoly0122s0034.2.v3.1 annot-version=v3.1	-50.1961	0.41364	24766.3	220	36	36	8	8	10	9	1.11111	11.9155	2	8
c160	c160.a1	c160.a1.a1	Mapoly0099s0004.1.p	pacid=33025020 transcript=Mapoly0099s0004.1 locus=Mapoly0099s0004 ID=Mapoly0099s0004.1.v3.1 annot-version=v3.1	-69.551	0.16542	74036	671	35	35	8	8	11	27	0.407407	1.5551	1	9
c161	c161.a1	c161.a1.a1	Mapoly0208s0003.1.p	pacid=33010445 transcript=Mapoly0208s0003.1 locus=Mapoly0208s0003 ID=Mapoly0208s0003.1.v3.1 annot-version=v3.1	-41.8656	0.1257	97732.6	899	31	15	8	6	9	21	0.428571	1.6827	1	8
c161	c161.a2	c161.a2.a1	Mapoly0042s0095.1.p	pacid=33016573 transcript=Mapoly0042s0095.1 locus=Mapoly0042s0095 ID=Mapoly0042s0095.1.v3.1 annot-version=v3.1	-24.2242	0.09657	50280.8	466	22	6	4	2	6	13	0.461538	1.89427	1	8
c162	c162.a1	c162.a1.a1	Mapoly0019s0036.1.p	pacid=33011267 transcript=Mapoly0019s0036.1 locus=Mapoly0019s0036 ID=Mapoly0019s0036.1.v3.1 annot-version=v3.1	-35.4955	0.20833	43590.9	384	32	32	7	7	8	14	0.571429	2.72759	1	9
c163	c163.a1	c163.a1.a1	Mapoly0248s0003.1.p	pacid=33025896 transcript=Mapoly0248s0003.1 locus=Mapoly0248s0003 ID=Mapoly0248s0003.1.v3.1 annot-version=v3.1	-56.51	0.20681	47369.4	411	32	32	7	7	9	16	0.5625	2.65174	1	9
c164	c164.a1	c164.a1.a1	Mapoly0037s0030.1.p	pacid=33008388 transcript=Mapoly0037s0030.1 locus=Mapoly0037s0030 ID=Mapoly0037s0030.1.v3.1 annot-version=v3.1	-49.0568	0.34188	26073.4	234	27	27	8	8	9	10	0.9	6.94328	1	7
c165	c165.a1	c165.a1.a1	Mapoly0214s0014.1.p	pacid=33016392 transcript=Mapoly0214s0014.1 locus=Mapoly0214s0014 ID=Mapoly0214s0014.1.v3.1 annot-version=v3.1	-44.9261	0.14798	69540.3	642	27	27	8	8	8	18	0.444444	1.78256	1	9
c166	c166.a1	c166.a1.a1	Mapoly0031s0128.1.p	pacid=33022788 transcript=Mapoly0031s0128.1 locus=Mapoly0031s0128 ID=Mapoly0031s0128.1.v3.1 annot-version=v3.1	-62.5233	0.28212	38592.9	358	26	26	8	8	9	16	0.5625	2.65174	1	8
c167	c167.a1	c167.a1.a1	Mapoly0064s0033.1.p	pacid=33013489 transcript=Mapoly0064s0033.1 locus=Mapoly0064s0033 ID=Mapoly0064s0033.1.v3.1 annot-version=v3.1	-39.599	0.34286	26027.9	245	25	25	8	8	8	9	0.888889	6.74264	1	9
c168	c168.a1	c168.a1.a1	Mapoly0001s0436.1.p	pacid=33020397 transcript=Mapoly0001s0436.1 locus=Mapoly0001s0436 ID=Mapoly0001s0436.1.v3.1 annot-version=v3.1	-52.8385	0.26551	43604.1	403	24	24	8	8	9	15	0.6	2.98107	1	7
c169	c169.a1	c169.a1.a1	Mapoly0001s0014.1.p	pacid=33019883 transcript=Mapoly0001s0014.1 locus=Mapoly0001s0014 ID=Mapoly0001s0014.1.v3.1 annot-version=v3.1	-48.1934	0.33906	26041.8	233	22	22	7	7	8	12	0.666667	3.64159	1	7
c170	c170.a1	c170.a1.a1	Mapoly0036s0103.1.p	pacid=33024163 transcript=Mapoly0036s0103.1 locus=Mapoly0036s0103 ID=Mapoly0036s0103.1.v3.1 annot-version=v3.1	-45.1702	0.26286	38270	350	20	20	7	7	9	14	0.642857	3.39397	1	6
c171	c171.a1	c171.a1.a1	Mapoly0002s0217.1.p	pacid=33023464 transcript=Mapoly0002s0217.1 locus=Mapoly0002s0217 ID=Mapoly0002s0217.1.v3.1 annot-version=v3.1	-54.3305	0.13778	79984.6	704	19	6	8	5	9	33	0.272727	0.873817	1	7
c171	c171.a2	c171.a2.a1	Mapoly0126s0019.1.p	pacid=33008229 transcript=Mapoly0126s0019.1 locus=Mapoly0126s0019 ID=Mapoly0126s0019.1.v3.1 annot-version=v3.1	-39.2861	0.0695	80331.6	705	16	3	5	2	7	32	0.21875	0.654817	2	6
c171	c171.a2	c171.a2.a2	Mapoly0126s0019.2.p	pacid=33008230 transcript=Mapoly0126s0019.2 locus=Mapoly0126s0019 ID=Mapoly0126s0019.2.v3.1 annot-version=v3.1	-39.2861	0.0695	80331.6	705	16	3	5	2	7	32	0.21875	0.654817	2	6
c172	c172.a1	c172.a1.a1	Mapoly0005s0220.1.p	pacid=33003257 transcript=Mapoly0005s0220.1 locus=Mapoly0005s0220 ID=Mapoly0005s0220.1.v3.1 annot-version=v3.1	-44.0196	0.19018	52101.6	489	18	18	7	7	9	23	0.391304	1.46209	1	6
c173	c173.a1	c173.a1.a1	Mapoly0076s0057.1.p	pacid=33016311 transcript=Mapoly0076s0057.1 locus=Mapoly0076s0057 ID=Mapoly0076s0057.1.v3.1 annot-version=v3.1	-35.594	0.41667	16819.1	156	17	17	5	5	9	7	1.28571	18.307	2	3
c173	c173.a1	c173.a1.a2	Mapoly0076s0058.1.p	pacid=33016308 transcript=Mapoly0076s0058.1 locus=Mapoly0076s0058 ID=Mapoly0076s0058.1.v3.1 annot-version=v3.1	-35.594	0.41667	16848.2	156	17	17	5	5	9	6	1.5	30.6228	2	3
c174	c174.a1	c174.a1.a1	Mapoly0025s0055.1.p	pacid=33027396 transcript=Mapoly0025s0055.1 locus=Mapoly0025s0055 ID=Mapoly0025s0055.1.v3.1 annot-version=v3.1	-59.599	0.31068	33782.1	309	17	17	8	8	9	12	0.75	4.62341	1	5
c175	c175.a1	c175.a1.a1	Mapoly0203s0012.1.p	pacid=33020704 transcript=Mapoly0203s0012.1 locus=Mapoly0203s0012 ID=Mapoly0203s0012.1.v3.1 annot-version=v3.1	-50.7176	0.15008	63139.4	593	17	17	8	8	8	19	0.421053	1.63665	1	6
c176	c176.a1	c176.a1.a1	Mapoly0125s0006.1.p	pacid=33016444 transcript=Mapoly0125s0006.1 locus=Mapoly0125s0006 ID=Mapoly0125s0006.1.v3.1 annot-version=v3.1	-44.0113	0.16863	60970.6	593	16	16	8	8	8	23	0.347826	1.22754	1	4
c177	c177.a1	c177.a1.a1	Mapoly0137s0029.1.p	pacid=33024736 transcript=Mapoly0137s0029.1 locus=Mapoly0137s0029 ID=Mapoly0137s0029.1.v3.1 annot-version=v3.1	-54.3106	0.20265	58407.1	528	15	15	8	8	9	19	0.473684	1.97635	1	3
c178	c178.a1	c178.a1.a1	Mapoly0052s0062.1.p	pacid=33026758 transcript=Mapoly0052s0062.1 locus=Mapoly0052s0062 ID=Mapoly0052s0062.1.v3.1 annot-version=v3.1	-22.6121	0.12644	67223.4	609	12	12	7	7	8	26	0.307692	1.03092	1	3
c179	c179.a1	c179.a1.a1	Mapoly0032s0074.1.p	pacid=33011660 transcript=Mapoly0032s0074.1 locus=Mapoly0032s0074 ID=Mapoly0032s0074.1.v3.1 annot-version=v3.1	-43.7108	0.27964	35444.1	329	11	10	8	7	8	16	0.5	2.16228	1	3
c179	c179.a2	c179.a2.a1	Mapoly0009s0175.1.p	pacid=33017177 transcript=Mapoly0009s0175.1 locus=Mapoly0009s0175 ID=Mapoly0009s0175.1.v3.1 annot-version=v3.1	-34.4802	0.14804	35122.7	331	7	4	4	2	7	11	0.636364	3.32876	1	2
c179	c179.a3	c179.a3.a1	Mapoly0050s0029.1.p	pacid=33006207 transcript=Mapoly0050s0029.1 locus=Mapoly0050s0029 ID=Mapoly0050s0029.1.v3.1 annot-version=v3.1	-31.5357	0.14939	34968.7	328	7	4	4	2	5	14	0.357143	1.27585	3	3
c179	c179.a3	c179.a3.a2	Mapoly0050s0029.2.p	pacid=33006208 transcript=Mapoly0050s0029.2 locus=Mapoly0050s0029 ID=Mapoly0050s0029.2.v3.1 annot-version=v3.1	-31.5357	0.14939	34968.7	328	7	4	4	2	5	14	0.357143	1.27585	3	3
c179	c179.a3	c179.a3.a3	Mapoly0050s0029.3.p	pacid=33006209 transcript=Mapoly0050s0029.3 locus=Mapoly0050s0029 ID=Mapoly0050s0029.3.v3.1 annot-version=v3.1	-31.5357	0.14939	34968.7	328	7	4	4	2	5	14	0.357143	1.27585	3	3
c179	c179.a4	c179.a4.a1	Mapoly0124s0039.1.p	pacid=33012683 transcript=Mapoly0124s0039.1 locus=Mapoly0124s0039 ID=Mapoly0124s0039.1.v3.1 annot-version=v3.1	-15.9674	0.09907	34274.3	323	6	5	3	2	3	19	0.157895	0.43845	1	4
c179	c179.a5	c179.a5.a1	Mapoly0038s0040.1.p	pacid=33004707 transcript=Mapoly0038s0040.1 locus=Mapoly0038s0040 ID=Mapoly0038s0040.1.v3.1 annot-version=v3.1	-14.289	0.09309	36289.1	333	3	2	3	2	3	16	0.1875	0.539927	1	2
c180	c180.a1	c180.a1.a1	Mapoly0037s0119.1.p	pacid=33008415 transcript=Mapoly0037s0119.1 locus=Mapoly0037s0119 ID=Mapoly0037s0119.1.v3.1 annot-version=v3.1	-23.9208	0.16751	20837.2	197	55	55	2	2	11	3	3.66667	4640.59	1	9
c181	c181.a1	c181.a1.a1	Mapoly0028s0005.1.p	pacid=33018210 transcript=Mapoly0028s0005.1 locus=Mapoly0028s0005 ID=Mapoly0028s0005.1.v3.1 annot-version=v3.1	-46.3393	0.209	34265.9	311	57	57	4	4	9	8	1.125	12.3352	1	9
c182	c182.a1	c182.a1.a1	Mapoly0032s0076.1.p	pacid=33011513 transcript=Mapoly0032s0076.1 locus=Mapoly0032s0076 ID=Mapoly0032s0076.1.v3.1 annot-version=v3.1	-30.0982	0.24138	20848.7	203	52	52	5	5	8	3	2.66667	463.159	1	9
c183	c183.a1	c183.a1.a1	Mapoly0084s0009.1.p	pacid=33025639 transcript=Mapoly0084s0009.1 locus=Mapoly0084s0009 ID=Mapoly0084s0009.1.v3.1 annot-version=v3.1	-39.1341	0.34031	19847.4	191	47	47	5	5	8	5	1.6	38.8107	1	9
c184	c184.a1	c184.a1.a1	Mapoly0107s0008.1.p	pacid=33020910 transcript=Mapoly0107s0008.1 locus=Mapoly0107s0008 ID=Mapoly0107s0008.1.v3.1 annot-version=v3.1	-49.7007	0.48276	16665.1	145	47	40	5	4	7	10	0.7	4.01187	1	9
c184	c184.a2	c184.a2.a1	Mapoly0118s0047.1.p	pacid=33019619 transcript=Mapoly0118s0047.1 locus=Mapoly0118s0047 ID=Mapoly0118s0047.1.v3.1 annot-version=v3.1	-39.6208	0.47552	16224.1	143	15	8	5	4	6	9	0.666667	3.64159	2	7
c184	c184.a2	c184.a2.a2	Mapoly0118s0048.1.p	pacid=33019593 transcript=Mapoly0118s0048.1 locus=Mapoly0118s0048 ID=Mapoly0118s0048.1.v3.1 annot-version=v3.1	-39.6208	0.47552	16254.1	143	15	8	5	4	6	9	0.666667	3.64159	2	7
c185	c185.a1	c185.a1.a1	Mapoly0072s0041.1.p	pacid=33008570 transcript=Mapoly0072s0041.1 locus=Mapoly0072s0041 ID=Mapoly0072s0041.1.v3.1 annot-version=v3.1	-51.4347	0.33523	18519.6	176	45	45	5	5	10	5	2	99	1	9
c186	c186.a1	c186.a1.a1	Mapoly0204s0015.1.p	pacid=33008135 transcript=Mapoly0204s0015.1 locus=Mapoly0204s0015 ID=Mapoly0204s0015.1.v3.1 annot-version=v3.1	-40.0364	0.11821	69697.4	626	40	40	5	5	9	19	0.473684	1.97635	1	9
c187	c187.a1	c187.a1.a1	Mapoly0183s0009.1.p	pacid=33025911 transcript=Mapoly0183s0009.1 locus=Mapoly0183s0009 ID=Mapoly0183s0009.1.v3.1 annot-version=v3.1	-32.741	0.18129	37240.3	342	30	30	5	5	8	10	0.8	5.30957	1	9
c188	c188.a1	c188.a1.a1	Mapoly0028s0038.1.p	pacid=33018174 transcript=Mapoly0028s0038.1 locus=Mapoly0028s0038 ID=Mapoly0028s0038.1.v3.1 annot-version=v3.1	-45.9547	0.41228	25075.3	228	26	26	7	7	7	13	0.538462	2.45511	1	9
c189	c189.a1	c189.a1.a1	Mapoly0066s0120.1.p	pacid=33005891 transcript=Mapoly0066s0120.1 locus=Mapoly0066s0120 ID=Mapoly0066s0120.1.v3.1 annot-version=v3.1	-52.9832	0.12673	87770.9	797	26	26	7	7	7	30	0.233333	0.711328	1	9
c190	c190.a1	c190.a1.a1	Mapoly0001s0161.1.p	pacid=33020639 transcript=Mapoly0001s0161.1 locus=Mapoly0001s0161 ID=Mapoly0001s0161.1.v3.1 annot-version=v3.1	-22.8851	0.25414	19721.6	181	25	25	6	6	8	10	0.8	5.30957	1	6
c191	c191.a1	c191.a1.a1	Mapoly0008s0199.1.p	pacid=33026587 transcript=Mapoly0008s0199.1 locus=Mapoly0008s0199 ID=Mapoly0008s0199.1.v3.1 annot-version=v3.1	-63.8039	0.09978	97541.3	892	25	25	6	6	7	16	0.4375	1.73842	1	8
c192	c192.a1	c192.a1.a1	Mapoly0067s0040.1.p	pacid=33019825 transcript=Mapoly0067s0040.1 locus=Mapoly0067s0040 ID=Mapoly0067s0040.1.v3.1 annot-version=v3.1	-58.2548	0.32523	34504	329	25	25	7	7	8	8	1	9	1	8
c193	c193.a1	c193.a1.a1	Mapoly0012s0175.1.p	pacid=33017623 transcript=Mapoly0012s0175.1 locus=Mapoly0012s0175 ID=Mapoly0012s0175.1.v3.1 annot-version=v3.1	-43.3433	0.1347	47781.4	438	23	23	7	7	7	17	0.411765	1.58086	1	8
c194	c194.a1	c194.a1.a1	Mapoly0001s0112.1.p	pacid=33020113 transcript=Mapoly0001s0112.1 locus=Mapoly0001s0112 ID=Mapoly0001s0112.1.v3.1 annot-version=v3.1	-36.8944	0.29213	21202.3	178	21	21	6	6	10	11	0.909091	7.11131	1	6
c195	c195.a1	c195.a1.a1	Mapoly0038s0097.1.p	pacid=33004807 transcript=Mapoly0038s0097.1 locus=Mapoly0038s0097 ID=Mapoly0038s0097.1.v3.1 annot-version=v3.1	-23.4327	0.33516	20795	182	20	20	6	6	7	7	1	9	2	7
c195	c195.a1	c195.a1.a2	Mapoly0207s0012.1.p	pacid=33009212 transcript=Mapoly0207s0012.1 locus=Mapoly0207s0012 ID=Mapoly0207s0012.1.v3.1 annot-version=v3.1	-23.4327	0.33516	20763.9	182	20	20	6	6	7	7	1	9	2	7
c196	c196.a1	c196.a1.a1	Mapoly0009s0050.1.p	pacid=33017220 transcript=Mapoly0009s0050.1 locus=Mapoly0009s0050 ID=Mapoly0009s0050.1.v3.1 annot-version=v3.1	-49.6071	0.16851	49938	451	20	20	6	6	7	18	0.388889	1.44844	1	9
c197	c197.a1	c197.a1.a1	Mapoly0001s0131.1.p	pacid=33020122 transcript=Mapoly0001s0131.1 locus=Mapoly0001s0131 ID=Mapoly0001s0131.1.v3.1 annot-version=v3.1	-35.6316	0.16667	54569.9	504	19	19	7	7	8	32	0.25	0.778279	2	7
c197	c197.a1	c197.a1.a2	Mapoly0001s0131.2.p	pacid=33020123 transcript=Mapoly0001s0131.2 locus=Mapoly0001s0131 ID=Mapoly0001s0131.2.v3.1 annot-version=v3.1	-35.6316	0.17284	52390.9	486	19	19	7	7	8	30	0.266667	0.84785	2	7
c198	c198.a1	c198.a1.a1	Mapoly0050s0040.1.p	pacid=33006138 transcript=Mapoly0050s0040.1 locus=Mapoly0050s0040 ID=Mapoly0050s0040.1.v3.1 annot-version=v3.1	-30.8291	0.24171	22627.5	211	19	19	4	4	8	6	1.33333	20.5443	2	5
c198	c198.a1	c198.a1.a2	Mapoly0050s0041.1.p	pacid=33006228 transcript=Mapoly0050s0041.1 locus=Mapoly0050s0041 ID=Mapoly0050s0041.1.v3.1 annot-version=v3.1	-30.8291	0.24171	22617.5	211	19	19	4	4	8	6	1.33333	20.5443	2	5
c199	c199.a1	c199.a1.a1	Mapoly0020s0166.1.p	pacid=33004236 transcript=Mapoly0020s0166.1 locus=Mapoly0020s0166 ID=Mapoly0020s0166.1.v3.1 annot-version=v3.1	-48.2475	0.34715	22032.7	193	19	19	6	6	8	9	0.888889	6.74264	1	7
c200	c200.a1	c200.a1.a1	Mapoly0072s0091.1.p	pacid=33008625 transcript=Mapoly0072s0091.1 locus=Mapoly0072s0091 ID=Mapoly0072s0091.1.v3.1 annot-version=v3.1	-32.1278	0.15113	43468.1	397	16	16	6	6	8	9	0.888889	6.74264	1	5
c201	c201.a1	c201.a1.a1	Mapoly0074s0068.3.p	pacid=33027729 transcript=Mapoly0074s0068.3 locus=Mapoly0074s0068 ID=Mapoly0074s0068.3.v3.1 annot-version=v3.1	-46.863	0.14367	57296.2	529	15	15	6	6	7	26	0.269231	0.858792	3	3
c201	c201.a1	c201.a1.a2	Mapoly0074s0068.6.p	pacid=33027726 transcript=Mapoly0074s0068.6 locus=Mapoly0074s0068 ID=Mapoly0074s0068.6.v3.1 annot-version=v3.1	-46.863	0.13149	62594.9	578	15	15	6	6	7	27	0.259259	0.8166	3	3
c201	c201.a1	c201.a1.a3	Mapoly0074s0068.7.p	pacid=33027727 transcript=Mapoly0074s0068.7 locus=Mapoly0074s0068 ID=Mapoly0074s0068.7.v3.1 annot-version=v3.1	-46.863	0.13149	62593.9	578	15	15	6	6	7	28	0.25	0.778279	3	3
c202	c202.a1	c202.a1.a1	Mapoly0112s0021.1.p	pacid=33012602 transcript=Mapoly0112s0021.1 locus=Mapoly0112s0021 ID=Mapoly0112s0021.1.v3.1 annot-version=v3.1	-39.7508	0.14038	56590.5	520	14	14	6	6	8	29	0.275862	0.887392	1	6
c203	c203.a1	c203.a1.a1	Mapoly0142s0007.1.p	pacid=33013803 transcript=Mapoly0142s0007.1 locus=Mapoly0142s0007 ID=Mapoly0142s0007.1.v3.1 annot-version=v3.1	-48.3321	0.27954	36883	347	14	14	6	6	7	12	0.583333	2.83119	1	5
c204	c204.a1	c204.a1.a1	Mapoly0007s0110.1.p	pacid=33022430 transcript=Mapoly0007s0110.1 locus=Mapoly0007s0110 ID=Mapoly0007s0110.1.v3.1 annot-version=v3.1	-53.692	0.26087	36541.7	345	13	12	7	6	8	16	0.5	2.16228	1	6
c204	c204.a2	c204.a2.a1	Mapoly0007s0011.1.p	pacid=33022205 transcript=Mapoly0007s0011.1 locus=Mapoly0007s0011 ID=Mapoly0007s0011.1.v3.1 annot-version=v3.1	-22.1178	0.15821	35240.9	335	4	3	4	3	4	20	0.2	0.584893	1	2
c205	c205.a1	c205.a1.a1	Mapoly0011s0112.1.p	pacid=33018039 transcript=Mapoly0011s0112.1 locus=Mapoly0011s0112 ID=Mapoly0011s0112.1.v3.1 annot-version=v3.1	-45.0284	0.15385	68460.7	624	13	13	7	7	7	34	0.205882	0.606506	1	7
c206	c206.a1	c206.a1.a1	Mapoly0093s0019.1.p	pacid=33025288 transcript=Mapoly0093s0019.1 locus=Mapoly0093s0019 ID=Mapoly0093s0019.1.v3.1 annot-version=v3.1	-39.4017	0.14344	54415.8	488	12	12	6	6	7	22	0.318182	1.08057	2	5
c206	c206.a1	c206.a1.a2	Mapoly0113s0041.1.p	pacid=33005136 transcript=Mapoly0113s0041.1 locus=Mapoly0113s0041 ID=Mapoly0113s0041.1.v3.1 annot-version=v3.1	-39.4017	0.14085	54966	497	12	12	6	6	7	21	0.333333	1.15443	2	5
c207	c207.a1	c207.a1.a1	Mapoly0037s0139.1.p	pacid=33008296 transcript=Mapoly0037s0139.1 locus=Mapoly0037s0139 ID=Mapoly0037s0139.1.v3.1 annot-version=v3.1	-34.2779	0.28922	22443	204	12	12	7	7	7	8	0.875	6.49894	1	3
c208	c208.a1	c208.a1.a1	Mapoly0003s0313.1.p	pacid=33010186 transcript=Mapoly0003s0313.1 locus=Mapoly0003s0313 ID=Mapoly0003s0313.1.v3.1 annot-version=v3.1	-26.9617	0.37912	20724.7	182	11	11	5	5	8	8	1	9	2	4
c208	c208.a1	c208.a1.a2	Mapoly0004s0279.1.p	pacid=33015723 transcript=Mapoly0004s0279.1 locus=Mapoly0004s0279 ID=Mapoly0004s0279.1.v3.1 annot-version=v3.1	-26.9617	0.37912	20529.6	182	11	11	5	5	8	9	0.888889	6.74264	2	4
c209	c209.a1	c209.a1.a1	Mapoly0038s0088.1.p	pacid=33004871 transcript=Mapoly0038s0088.1 locus=Mapoly0038s0088 ID=Mapoly0038s0088.1.v3.1 annot-version=v3.1	-47.6006	0.21277	35605.4	329	11	11	6	6	7	11	0.636364	3.32876	1	5
c210	c210.a1	c210.a1.a1	Mapoly0003s0020.1.p	pacid=33009959 transcript=Mapoly0003s0020.1 locus=Mapoly0003s0020 ID=Mapoly0003s0020.1.v3.1 annot-version=v3.1	-39.3457	0.09804	101208	918	10	10	7	7	7	33	0.212121	0.629751	1	4
c211	c211.a1	c211.a1.a1	Mapoly0027s0190.1.p	pacid=33021508 transcript=Mapoly0027s0190.1 locus=Mapoly0027s0190 ID=Mapoly0027s0190.1.v3.1 annot-version=v3.1	-40.0728	0.31818	20703.7	198	61	61	4	4	9	9	1	9	1	9
c212	c212.a1	c212.a1.a1	Mapoly0003s0257.1.p	pacid=33010102 transcript=Mapoly0003s0257.1 locus=Mapoly0003s0257 ID=Mapoly0003s0257.1.v3.1 annot-version=v3.1	-34.7355	0.37984	14694	129	59	4	4	1	7	6	1.16667	13.678	2	9
c212	c212.a1	c212.a1.a2	Mapoly0064s0119.1.p	pacid=33013463 transcript=Mapoly0064s0119.1 locus=Mapoly0064s0119 ID=Mapoly0064s0119.1.v3.1 annot-version=v3.1	-34.7355	0.37984	14694	129	59	4	4	1	7	6	1.16667	13.678	2	9
c212	c212.a2	c212.a2.a1	Mapoly0034s0121.1.p	pacid=33024651 transcript=Mapoly0034s0121.1 locus=Mapoly0034s0121 ID=Mapoly0034s0121.1.v3.1 annot-version=v3.1	-33.4211	0.5098	34211.4	306	57	2	4	1	6	19	0.315789	1.06914	4	9
c212	c212.a2	c212.a2.a2	Mapoly0080s0025.1.p	pacid=33023808 transcript=Mapoly0080s0025.1 locus=Mapoly0080s0025 ID=Mapoly0080s0025.1.v3.1 annot-version=v3.1	-33.4211	0.52131	68171.7	610	57	2	4	1	6	39	0.153846	0.425103	4	9
c212	c212.a2	c212.a2.a3	Mapoly0080s0025.2.p	pacid=33023809 transcript=Mapoly0080s0025.2 locus=Mapoly0080s0025 ID=Mapoly0080s0025.2.v3.1 annot-version=v3.1	-33.4211	0.5206	59670.1	534	57	2	4	1	6	34	0.176471	0.501311	4	9
c212	c212.a2	c212.a2.a4	Mapoly0080s0026.1.p	pacid=33023787 transcript=Mapoly0080s0026.1 locus=Mapoly0080s0026 ID=Mapoly0080s0026.1.v3.1 annot-version=v3.1	-33.4211	0.48908	51127.5	458	57	2	4	1	6	29	0.206897	0.610262	4	9
c213	c213.a1	c213.a1.a1	Mapoly0024s0073.1.p	pacid=33023081 transcript=Mapoly0024s0073.1 locus=Mapoly0024s0073 ID=Mapoly0024s0073.1.v3.1 annot-version=v3.1	-25.8786	0.13953	18496.8	172	40	40	3	3	8	2	4	9999	1	8
c214	c214.a1	c214.a1.a1	Mapoly0008s0038.1.p	pacid=33026568 transcript=Mapoly0008s0038.1 locus=Mapoly0008s0038 ID=Mapoly0008s0038.1.v3.1 annot-version=v3.1	-28.1929	0.07463	72882	670	39	39	5	5	6	24	0.25	0.778279	1	9
c215	c215.a1	c215.a1.a1	Mapoly0070s0014.1.p	pacid=33007598 transcript=Mapoly0070s0014.1 locus=Mapoly0070s0014 ID=Mapoly0070s0014.1.v3.1 annot-version=v3.1	-30.3241	0.138	52173.7	471	36	36	5	5	8	10	0.8	5.30957	1	9
c216	c216.a1	c216.a1.a1	Mapoly0088s0071.1.p	pacid=33012012 transcript=Mapoly0088s0071.1 locus=Mapoly0088s0071 ID=Mapoly0088s0071.1.v3.1 annot-version=v3.1	-32.3188	0.15445	41945.8	382	36	36	6	6	7	12	0.583333	2.83119	1	9
c217	c217.a1	c217.a1.a1	Mapoly0885s0001.1.p	pacid=33012518 transcript=Mapoly0885s0001.1 locus=Mapoly0885s0001 ID=Mapoly0885s0001.1.v3.1 annot-version=v3.1	-43.2602	0.15136	44584.2	403	35	10	6	1	7	12	0.583333	2.83119	1	9
c217	c217.a2	c217.a2.a1	Mapoly0010s0134.1.p	pacid=33022005 transcript=Mapoly0010s0134.1 locus=Mapoly0010s0134 ID=Mapoly0010s0134.1.v3.1 annot-version=v3.1	-31.7417	0.09359	63126.4	577	25	1	6	1	6	16	0.375	1.37137	1	8
c217	c217.a3	c217.a3.a1	Mapoly0041s0120.1.p	pacid=33005070 transcript=Mapoly0041s0120.1 locus=Mapoly0041s0120 ID=Mapoly0041s0120.1.v3.1 annot-version=v3.1	-27.9017	0.04675	106178	984	19	14	4	3	4	30	0.133333	0.359356	1	8
c218	c218.a1	c218.a1.a1	Mapoly0029s0154.1.p	pacid=33014605 transcript=Mapoly0029s0154.1 locus=Mapoly0029s0154 ID=Mapoly0029s0154.1.v3.1 annot-version=v3.1	-72.8017	0.52	16899.9	150	33	33	6	6	8	9	0.888889	6.74264	2	7
c218	c218.a1	c218.a1.a2	Mapoly0029s0154.2.p	pacid=33014606 transcript=Mapoly0029s0154.2 locus=Mapoly0029s0154 ID=Mapoly0029s0154.2.v3.1 annot-version=v3.1	-72.8017	0.52	16899.9	150	33	33	6	6	8	9	0.888889	6.74264	2	7
c219	c219.a1	c219.a1.a1	Mapoly0050s0096.1.p	pacid=33006193 transcript=Mapoly0050s0096.1 locus=Mapoly0050s0096 ID=Mapoly0050s0096.1.v3.1 annot-version=v3.1	-47.2394	0.24797	28670.4	246	33	33	6	6	8	14	0.571429	2.72759	1	7
c220	c220.a1	c220.a1.a1	Mapoly0118s0017.1.p	pacid=33019607 transcript=Mapoly0118s0017.1 locus=Mapoly0118s0017 ID=Mapoly0118s0017.1.v3.1 annot-version=v3.1	-28.4817	0.16406	27559.4	256	32	22	4	3	7	7	1	9	1	9
c220	c220.a2	c220.a2.a1	Mapoly0022s0139.1.p	pacid=33011066 transcript=Mapoly0022s0139.1 locus=Mapoly0022s0139 ID=Mapoly0022s0139.1.v3.1 annot-version=v3.1	-23.2871	0.16538	27718.3	260	21	11	4	3	6	7	0.857143	6.19686	2	9
c220	c220.a2	c220.a2.a2	Mapoly0022s0139.2.p	pacid=33011067 transcript=Mapoly0022s0139.2 locus=Mapoly0022s0139 ID=Mapoly0022s0139.2.v3.1 annot-version=v3.1	-23.2871	0.16538	27718.3	260	21	11	4	3	6	7	0.857143	6.19686	2	9
c220	c220.a3	c220.a3.a1	Mapoly0058s0021.1.p	pacid=33022958 transcript=Mapoly0058s0021.1 locus=Mapoly0058s0021 ID=Mapoly0058s0021.1.v3.1 annot-version=v3.1	-16.8351	0.08108	27964.7	259	10	1	2	1	3	6	0.5	2.16228	1	6
c221	c221.a1	c221.a1.a1	Mapoly0098s0025.1.p	pacid=33020992 transcript=Mapoly0098s0025.1 locus=Mapoly0098s0025 ID=Mapoly0098s0025.1.v3.1 annot-version=v3.1	-47.9968	0.2008	28220.3	249	29	29	5	5	7	10	0.7	4.01187	1	7
c222	c222.a1	c222.a1.a1	Mapoly0068s0058.1.p	pacid=33024878 transcript=Mapoly0068s0058.1 locus=Mapoly0068s0058 ID=Mapoly0068s0058.1.v3.1 annot-version=v3.1	-36.7231	0.27053	24114.5	207	28	28	5	5	7	5	1.4	24.1189	1	6
c223	c223.a1	c223.a1.a1	Mapoly0078s0058.1.p	pacid=33010768 transcript=Mapoly0078s0058.1 locus=Mapoly0078s0058 ID=Mapoly0078s0058.1.v3.1 annot-version=v3.1	-30.643	0.27059	18262.5	170	28	28	3	3	6	5	1.2	14.8489	1	9
c224	c224.a1	c224.a1.a1	Mapoly0090s0082.1.p	pacid=33014363 transcript=Mapoly0090s0082.1 locus=Mapoly0090s0082 ID=Mapoly0090s0082.1.v3.1 annot-version=v3.1	-41.883	0.15385	54804	507	27	27	6	6	7	12	0.583333	2.83119	2	9
c224	c224.a1	c224.a1.a2	Mapoly0090s0082.2.p	pacid=33014364 transcript=Mapoly0090s0082.2 locus=Mapoly0090s0082 ID=Mapoly0090s0082.2.v3.1 annot-version=v3.1	-41.883	0.15415	54660.9	506	27	27	6	6	7	13	0.538462	2.45511	2	9
c225	c225.a1	c225.a1.a1	Mapoly0038s0083.1.p	pacid=33004720 transcript=Mapoly0038s0083.1 locus=Mapoly0038s0083 ID=Mapoly0038s0083.1.v3.1 annot-version=v3.1	-43.3438	0.15341	38564.9	352	26	26	5	5	8	10	0.8	5.30957	1	9
c226	c226.a1	c226.a1.a1	Mapoly0062s0004.1.p	pacid=33016795 transcript=Mapoly0062s0004.1 locus=Mapoly0062s0004 ID=Mapoly0062s0004.1.v3.1 annot-version=v3.1	-46.6657	0.35556	24989.5	225	26	26	6	6	6	6	1	9	1	9
c227	c227.a1	c227.a1.a1	Mapoly0005s0203.1.p	pacid=33003428 transcript=Mapoly0005s0203.1 locus=Mapoly0005s0203 ID=Mapoly0005s0203.1.v3.1 annot-version=v3.1	-53.5271	0.3125	18805.6	192	25	25	5	5	6	9	0.666667	3.64159	1	9
c228	c228.a1	c228.a1.a1	Mapoly0178s0011.1.p	pacid=33016499 transcript=Mapoly0178s0011.1 locus=Mapoly0178s0011 ID=Mapoly0178s0011.1.v3.1 annot-version=v3.1	-49.6955	0.23358	14372.3	137	23	23	4	4	9	3	3	999	1	3
c229	c229.a1	c229.a1.a1	Mapoly0032s0066.1.p	pacid=33011541 transcript=Mapoly0032s0066.1 locus=Mapoly0032s0066 ID=Mapoly0032s0066.1.v3.1 annot-version=v3.1	-64.1722	0.2337	40558.6	368	22	22	6	6	8	9	0.888889	6.74264	1	5
c230	c230.a1	c230.a1.a1	Mapoly0042s0022.1.p	pacid=33016632 transcript=Mapoly0042s0022.1 locus=Mapoly0042s0022 ID=Mapoly0042s0022.1.v3.1 annot-version=v3.1	-36.6232	0.23077	30163.9	286	22	22	5	5	7	7	1	9	1	9
c231	c231.a1	c231.a1.a1	Mapoly0003s0306.1.p	pacid=33010143 transcript=Mapoly0003s0306.1 locus=Mapoly0003s0306 ID=Mapoly0003s0306.1.v3.1 annot-version=v3.1	-32.4077	0.13043	51005.6	460	21	21	5	5	6	16	0.375	1.37137	2	8
c231	c231.a1	c231.a1.a2	Mapoly0003s0306.2.p	pacid=33010144 transcript=Mapoly0003s0306.2 locus=Mapoly0003s0306 ID=Mapoly0003s0306.2.v3.1 annot-version=v3.1	-32.4077	0.13043	51005.6	460	21	21	5	5	6	16	0.375	1.37137	2	8
c232	c232.a1	c232.a1.a1	Mapoly0020s0158.1.p	pacid=33004201 transcript=Mapoly0020s0158.1 locus=Mapoly0020s0158 ID=Mapoly0020s0158.1.v3.1 annot-version=v3.1	-35.6221	0.21429	25393.4	224	21	21	5	5	7	11	0.636364	3.32876	1	8
c233	c233.a1	c233.a1.a1	Mapoly0042s0090.1.p	pacid=33016571 transcript=Mapoly0042s0090.1 locus=Mapoly0042s0090 ID=Mapoly0042s0090.1.v3.1 annot-version=v3.1	-30.0305	0.33333	24204.4	222	21	21	6	6	7	9	0.777778	4.99484	1	9
c234	c234.a1	c234.a1.a1	Mapoly0054s0017.1.p	pacid=33017415 transcript=Mapoly0054s0017.1 locus=Mapoly0054s0017 ID=Mapoly0054s0017.1.v3.1 annot-version=v3.1	-52.0845	0.15559	68110.6	617	20	20	6	6	7	16	0.4375	1.73842	1	8
c235	c235.a1	c235.a1.a1	Mapoly0075s0037.1.p	pacid=33018588 transcript=Mapoly0075s0037.1 locus=Mapoly0075s0037 ID=Mapoly0075s0037.1.v3.1 annot-version=v3.1	-41.0842	0.18116	47083.1	414	19	16	6	5	7	20	0.35	1.23872	3	5
c235	c235.a1	c235.a1.a2	Mapoly0075s0037.2.p	pacid=33018589 transcript=Mapoly0075s0037.2 locus=Mapoly0075s0037 ID=Mapoly0075s0037.2.v3.1 annot-version=v3.1	-41.0842	0.18116	47083.1	414	19	16	6	5	7	20	0.35	1.23872	3	5
c235	c235.a1	c235.a1.a3	Mapoly0075s0037.3.p	pacid=33018590 transcript=Mapoly0075s0037.3 locus=Mapoly0075s0037 ID=Mapoly0075s0037.3.v3.1 annot-version=v3.1	-41.0842	0.2027	42053.9	370	19	16	6	5	7	20	0.35	1.23872	3	5
c235	c235.a2	c235.a2.a1	Mapoly0112s0059.1.p	pacid=33012615 transcript=Mapoly0112s0059.1 locus=Mapoly0112s0059 ID=Mapoly0112s0059.1.v3.1 annot-version=v3.1	-36.8904	0.06326	46402.8	411	8	5	4	3	6	21	0.285714	0.930698	3	4
c235	c235.a2	c235.a2.a2	Mapoly0112s0059.2.p	pacid=33012616 transcript=Mapoly0112s0059.2 locus=Mapoly0112s0059 ID=Mapoly0112s0059.2.v3.1 annot-version=v3.1	-36.8904	0.06326	46402.8	411	8	5	4	3	6	21	0.285714	0.930698	3	4
c235	c235.a2	c235.a2.a3	Mapoly0112s0059.3.p	pacid=33012617 transcript=Mapoly0112s0059.3 locus=Mapoly0112s0059 ID=Mapoly0112s0059.3.v3.1 annot-version=v3.1	-36.8904	0.06326	46402.8	411	8	5	4	3	6	21	0.285714	0.930698	3	4
c236	c236.a1	c236.a1.a1	Mapoly0027s0126.1.p	pacid=33021396 transcript=Mapoly0027s0126.1 locus=Mapoly0027s0126 ID=Mapoly0027s0126.1.v3.1 annot-version=v3.1	-43.1946	0.24911	30896.7	281	19	19	6	6	6	9	0.666667	3.64159	2	6
c236	c236.a1	c236.a1.a2	Mapoly0027s0187.1.p	pacid=33021416 transcript=Mapoly0027s0187.1 locus=Mapoly0027s0187 ID=Mapoly0027s0187.1.v3.1 annot-version=v3.1	-43.1946	0.24911	30896.7	281	19	19	6	6	6	9	0.666667	3.64159	2	6
c237	c237.a1	c237.a1.a1	Mapoly0044s0045.1.p	pacid=33013057 transcript=Mapoly0044s0045.1 locus=Mapoly0044s0045 ID=Mapoly0044s0045.1.v3.1 annot-version=v3.1	-25.3227	0.05723	104440	961	19	19	5	5	6	38	0.157895	0.43845	1	9
c238	c238.a1	c238.a1.a1	Mapoly0087s0039.1.p	pacid=33025538 transcript=Mapoly0087s0039.1 locus=Mapoly0087s0039 ID=Mapoly0087s0039.1.v3.1 annot-version=v3.1	-25.4924	0.17598	39673.2	358	19	19	6	6	7	12	0.583333	2.83119	1	9
c239	c239.a1	c239.a1.a1	Mapoly2298s0001.1.p	pacid=33014281 transcript=Mapoly2298s0001.1 locus=Mapoly2298s0001 ID=Mapoly2298s0001.1.v3.1 annot-version=v3.1	-37.3354	0.34416	15754.8	154	17	17	4	4	6	4	1.5	30.6228	2	7
c239	c239.a1	c239.a1.a2	Mapoly2590s0001.1.p	pacid=33024979 transcript=Mapoly2590s0001.1 locus=Mapoly2590s0001 ID=Mapoly2590s0001.1.v3.1 annot-version=v3.1	-37.3354	0.34416	15770.8	154	17	17	4	4	6	4	1.5	30.6228	2	7
c240	c240.a1	c240.a1.a1	Mapoly0001s0111.1.p	pacid=33020200 transcript=Mapoly0001s0111.1 locus=Mapoly0001s0111 ID=Mapoly0001s0111.1.v3.1 annot-version=v3.1	-42.4795	0.08131	103785	947	17	17	5	5	7	34	0.205882	0.606506	1	8
c241	c241.a1	c241.a1.a1	Mapoly0020s0150.1.p	pacid=33004207 transcript=Mapoly0020s0150.1 locus=Mapoly0020s0150 ID=Mapoly0020s0150.1.v3.1 annot-version=v3.1	-19.9583	0.45588	15609.8	136	17	17	6	6	6	4	1.5	30.6228	1	7
c242	c242.a1	c242.a1.a1	Mapoly0021s0076.1.p	pacid=33007828 transcript=Mapoly0021s0076.1 locus=Mapoly0021s0076 ID=Mapoly0021s0076.1.v3.1 annot-version=v3.1	-26.6314	0.48819	14232.5	127	17	17	5	5	6	4	1.5	30.6228	1	6
c243	c243.a1	c243.a1.a1	Mapoly0137s0006.1.p	pacid=33024748 transcript=Mapoly0137s0006.1 locus=Mapoly0137s0006 ID=Mapoly0137s0006.1.v3.1 annot-version=v3.1	-28.5016	0.19938	36650.6	321	16	16	5	5	6	17	0.352941	1.25393	1	7
c244	c244.a1	c244.a1.a1	Mapoly0149s0034.1.p	pacid=33008741 transcript=Mapoly0149s0034.1 locus=Mapoly0149s0034 ID=Mapoly0149s0034.1.v3.1 annot-version=v3.1	-31.3244	0.09792	50165.8	480	16	16	4	4	6	5	1.2	14.8489	1	8
c245	c245.a1	c245.a1.a1	Mapoly0003s0256.1.p	pacid=33010156 transcript=Mapoly0003s0256.1 locus=Mapoly0003s0256 ID=Mapoly0003s0256.1.v3.1 annot-version=v3.1	-40.1084	0.3806	15428.5	134	15	15	5	5	7	5	1.4	24.1189	1	4
c246	c246.a1	c246.a1.a1	Mapoly0008s0132.1.p	pacid=33026503 transcript=Mapoly0008s0132.1 locus=Mapoly0008s0132 ID=Mapoly0008s0132.1.v3.1 annot-version=v3.1	-35.9553	0.38816	16329.6	152	15	15	5	5	6	5	1.2	14.8489	1	7
c247	c247.a1	c247.a1.a1	Mapoly0009s0025.1.p	pacid=33017219 transcript=Mapoly0009s0025.1 locus=Mapoly0009s0025 ID=Mapoly0009s0025.1.v3.1 annot-version=v3.1	-39.6639	0.30734	24188.3	218	15	15	6	6	7	8	0.875	6.49894	1	7
c248	c248.a1	c248.a1.a1	Mapoly0043s0019.1.p	pacid=33021163 transcript=Mapoly0043s0019.1 locus=Mapoly0043s0019 ID=Mapoly0043s0019.1.v3.1 annot-version=v3.1	-31.8465	0.26054	29411.6	261	15	13	5	4	6	13	0.461538	1.89427	1	8
c248	c248.a2	c248.a2.a1	Mapoly0009s0108.1.p	pacid=33017110 transcript=Mapoly0009s0108.1 locus=Mapoly0009s0108 ID=Mapoly0009s0108.1.v3.1 annot-version=v3.1	-25.2582	0.18491	30153.9	265	10	8	4	3	5	15	0.333333	1.15443	1	7
c249	c249.a1	c249.a1.a1	Mapoly0001s0499.1.p	pacid=33020298 transcript=Mapoly0001s0499.1 locus=Mapoly0001s0499 ID=Mapoly0001s0499.1.v3.1 annot-version=v3.1	-30.1408	0.11564	64876.2	614	14	14	6	6	6	28	0.214286	0.637894	1	9
c250	c250.a1	c250.a1.a1	Mapoly0015s0154.1.p	pacid=33019400 transcript=Mapoly0015s0154.1 locus=Mapoly0015s0154 ID=Mapoly0015s0154.1.v3.1 annot-version=v3.1	-24.7628	0.25238	23793.3	210	13	13	5	5	6	8	0.75	4.62341	1	6
c251	c251.a1	c251.a1.a1	Mapoly0209s0006.1.p	pacid=33026674 transcript=Mapoly0209s0006.1 locus=Mapoly0209s0006 ID=Mapoly0209s0006.1.v3.1 annot-version=v3.1	-41.5616	0.09395	70125.9	628	13	13	5	5	6	22	0.272727	0.873817	1	6
c252	c252.a1	c252.a1.a1	Mapoly0001s0098.1.p	pacid=33020544 transcript=Mapoly0001s0098.1 locus=Mapoly0001s0098 ID=Mapoly0001s0098.1.v3.1 annot-version=v3.1	-22.397	0.19946	39204.2	371	10	10	5	5	6	10	0.6	2.98107	1	6
c253	c253.a1	c253.a1.a1	Mapoly0015s0198.1.p	pacid=33019434 transcript=Mapoly0015s0198.1 locus=Mapoly0015s0198 ID=Mapoly0015s0198.1.v3.1 annot-version=v3.1	-54.3947	0.22275	46019.8	422	12	12	6	6	6	14	0.428571	1.6827	1	3
c254	c254.a1	c254.a1.a1	Mapoly0057s0007.1.p	pacid=33011844 transcript=Mapoly0057s0007.1 locus=Mapoly0057s0007 ID=Mapoly0057s0007.1.v3.1 annot-version=v3.1	-33.2781	0.12526	53547.6	487	12	12	5	5	7	19	0.368421	1.33572	1	3
c255	c255.a1	c255.a1.a1	Mapoly0083s0030.1.p	pacid=33025361 transcript=Mapoly0083s0030.1 locus=Mapoly0083s0030 ID=Mapoly0083s0030.1.v3.1 annot-version=v3.1	-34.8458	0.1355	57271.8	524	10	10	6	6	7	22	0.318182	1.08057	2	4
c255	c255.a1	c255.a1.a2	Mapoly0083s0032.1.p	pacid=33025362 transcript=Mapoly0083s0032.1 locus=Mapoly0083s0032 ID=Mapoly0083s0032.1.v3.1 annot-version=v3.1	-34.8458	0.1355	57271.8	524	10	10	6	6	7	22	0.318182	1.08057	2	4
c256	c256.a1	c256.a1.a1	Mapoly0001s0227.1.p	pacid=33020481 transcript=Mapoly0001s0227.1 locus=Mapoly0001s0227 ID=Mapoly0001s0227.1.v3.1 annot-version=v3.1	-28.5	0.08596	75770.6	698	10	10	5	5	6	20	0.3	0.995262	1	3
c257	c257.a1	c257.a1.a1	Mapoly0037s0125.1.p	pacid=33008319 transcript=Mapoly0037s0125.1 locus=Mapoly0037s0125 ID=Mapoly0037s0125.1.v3.1 annot-version=v3.1	-38.8748	0.08487	91464	813	10	10	6	6	6	32	0.1875	0.539927	1	5
c258	c258.a1	c258.a1.a1	Mapoly0342s0001.1.p	pacid=33014572 transcript=Mapoly0342s0001.1 locus=Mapoly0342s0001 ID=Mapoly0342s0001.1.v3.1 annot-version=v3.1	-28.2801	0.25581	18544	172	10	4	3	2	6	4	1.5	30.6228	1	4
c258	c258.a2	c258.a2.a1	Mapoly1233s0001.1.p	pacid=33015560 transcript=Mapoly1233s0001.1 locus=Mapoly1233s0001 ID=Mapoly1233s0001.1.v3.1 annot-version=v3.1	-14.1531	0.11047	18607	172	8	2	2	1	4	5	0.8	5.30957	1	4
c259	c259.a1	c259.a1.a1	Mapoly0057s0005.1.p	pacid=33011770 transcript=Mapoly0057s0005.1 locus=Mapoly0057s0005 ID=Mapoly0057s0005.1.v3.1 annot-version=v3.1	-31.7647	0.09229	86124.2	791	7	7	6	6	6	35	0.171429	0.483982	1	3
c260	c260.a1	c260.a1.a1	Mapoly0047s0030.1.p	pacid=33013957 transcript=Mapoly0047s0030.1 locus=Mapoly0047s0030 ID=Mapoly0047s0030.1.v3.1 annot-version=v3.1	-39.7087	0.17361	46206	432	6	6	6	6	6	14	0.428571	1.6827	1	1
c261	c261.a1	c261.a1.a1	Mapoly0006s0217.1.p	pacid=33007052 transcript=Mapoly0006s0217.1 locus=Mapoly0006s0217 ID=Mapoly0006s0217.1.v3.1 annot-version=v3.1	-42.6556	0.39535	18220.5	172	48	48	4	4	7	4	1.75	55.2341	1	9
c262	c262.a1	c262.a1.a1	Mapoly0098s0022.1.p	pacid=33021019 transcript=Mapoly0098s0022.1 locus=Mapoly0098s0022 ID=Mapoly0098s0022.1.v3.1 annot-version=v3.1	-34.7912	0.21104	33238.4	308	46	46	5	5	7	10	0.7	4.01187	1	9
c263	c263.a1	c263.a1.a1	Mapoly0112s0010.1.p	pacid=33012651 transcript=Mapoly0112s0010.1 locus=Mapoly0112s0010 ID=Mapoly0112s0010.1.v3.1 annot-version=v3.1	-25.3096	0.05858	50966.8	478	39	39	2	2	8	20	0.4	1.51189	1	9
c264	c264.a1	c264.a1.a1	Mapoly0077s0034.1.p	pacid=33019248 transcript=Mapoly0077s0034.1 locus=Mapoly0077s0034 ID=Mapoly0077s0034.1.v3.1 annot-version=v3.1	-37.7748	0.12136	45191.4	412	31	31	4	4	6	11	0.545455	2.51119	1	9
c265	c265.a1	c265.a1.a1	Mapoly0003s0013.1.p	pacid=33009841 transcript=Mapoly0003s0013.1 locus=Mapoly0003s0013 ID=Mapoly0003s0013.1.v3.1 annot-version=v3.1	-41.1757	0.06837	90663.4	863	30	30	5	5	6	23	0.26087	0.823348	1	9
c266	c266.a1	c266.a1.a1	Mapoly0006s0216.1.p	pacid=33007114 transcript=Mapoly0006s0216.1 locus=Mapoly0006s0216 ID=Mapoly0006s0216.1.v3.1 annot-version=v3.1	-30.0968	0.28402	17709.2	169	29	29	4	4	6	6	1	9	1	9
c267	c267.a1	c267.a1.a1	Mapoly0053s0104.1.p	pacid=33014916 transcript=Mapoly0053s0104.1 locus=Mapoly0053s0104 ID=Mapoly0053s0104.1.v3.1 annot-version=v3.1	-36.586	0.13584	37341.5	346	29	29	3	3	6	11	0.545455	2.51119	1	9
c268	c268.a1	c268.a1.a1	Mapoly0043s0043.1.p	pacid=33021245 transcript=Mapoly0043s0043.1 locus=Mapoly0043s0043 ID=Mapoly0043s0043.1.v3.1 annot-version=v3.1	-32.6969	0.25854	24266.4	205	27	27	5	5	7	10	0.7	4.01187	1	8
c269	c269.a1	c269.a1.a1	Mapoly0112s0050.1.p	pacid=33012640 transcript=Mapoly0112s0050.1 locus=Mapoly0112s0050 ID=Mapoly0112s0050.1.v3.1 annot-version=v3.1	-34.7922	0.13556	115451	1077	10	10	5	5	5	54	0.0925926	0.237635	1	4
c270	c270.a1	c270.a1.a1	Mapoly0024s0020.1.p	pacid=33023057 transcript=Mapoly0024s0020.1 locus=Mapoly0024s0020 ID=Mapoly0024s0020.1.v3.1 annot-version=v3.1	-13.2836	0.1236	19090.6	178	24	24	3	3	5	2	2.5	315.228	1	9
c271	c271.a1	c271.a1.a1	Mapoly0090s0078.1.p	pacid=33014394 transcript=Mapoly0090s0078.1 locus=Mapoly0090s0078 ID=Mapoly0090s0078.1.v3.1 annot-version=v3.1	-25.944	0.0894	65022.1	604	24	24	5	5	6	17	0.352941	1.25393	1	8
c272	c272.a1	c272.a1.a1		Catalase - Homo sapiens (Human).	-49.0358	0.10816	59718.8	527	24	24	5	5	5	24	0.208333	0.615598	1	9
c273	c273.a1	c273.a1.a1	Mapoly0037s0115.1.p	pacid=33008341 transcript=Mapoly0037s0115.1 locus=Mapoly0037s0115 ID=Mapoly0037s0115.1.v3.1 annot-version=v3.1	-37.4761	0.29834	18639.3	181	23	23	4	4	6	2	3	999	1	7
c274	c274.a1	c274.a1.a1	Mapoly0041s0003.1.p	pacid=33005089 transcript=Mapoly0041s0003.1 locus=Mapoly0041s0003 ID=Mapoly0041s0003.1.v3.1 annot-version=v3.1	-31.1697	0.18596	30124.5	285	23	23	4	4	6	6	1	9	1	9
c275	c275.a1	c275.a1.a1	Mapoly0043s0115.1.p	pacid=33021077 transcript=Mapoly0043s0115.1 locus=Mapoly0043s0115 ID=Mapoly0043s0115.1.v3.1 annot-version=v3.1	-24.0225	0.05274	104270	948	21	21	5	5	5	30	0.166667	0.467799	1	9
c276	c276.a1	c276.a1.a1	Mapoly0141s0002.1.p	pacid=33009605 transcript=Mapoly0141s0002.1 locus=Mapoly0141s0002 ID=Mapoly0141s0002.1.v3.1 annot-version=v3.1	-20.817	0.11688	41900.9	385	20	20	5	5	6	12	0.5	2.16228	2	9
c276	c276.a1	c276.a1.a2	Mapoly0259s0002.1.p	pacid=33007399 transcript=Mapoly0259s0002.1 locus=Mapoly0259s0002 ID=Mapoly0259s0002.1.v3.1 annot-version=v3.1	-20.817	0.11688	41900.9	385	20	20	5	5	6	12	0.5	2.16228	2	9
c277	c277.a1	c277.a1.a1	Mapoly0007s0126.1.p	pacid=33022524 transcript=Mapoly0007s0126.1 locus=Mapoly0007s0126 ID=Mapoly0007s0126.1.v3.1 annot-version=v3.1	-33.3777	0.26117	32850.9	291	19	19	5	5	5	15	0.333333	1.15443	1	9
c278	c278.a1	c278.a1.a1	Mapoly0056s0025.1.p	pacid=33013114 transcript=Mapoly0056s0025.1 locus=Mapoly0056s0025 ID=Mapoly0056s0025.1.v3.1 annot-version=v3.1	-42.3038	0.12143	59070	560	17	17	5	5	5	10	0.5	2.16228	1	8
c279	c279.a1	c279.a1.a1	Mapoly0144s0025.1.p	pacid=33018289 transcript=Mapoly0144s0025.1 locus=Mapoly0144s0025 ID=Mapoly0144s0025.1.v3.1 annot-version=v3.1	-30.1544	0.10769	61971.7	585	17	17	5	5	5	33	0.151515	0.417474	1	7
c280	c280.a1	c280.a1.a1	Mapoly0003s0086.1.p	pacid=33009805 transcript=Mapoly0003s0086.1 locus=Mapoly0003s0086 ID=Mapoly0003s0086.1.v3.1 annot-version=v3.1	-16.2338	0.19708	15316.5	137	14	14	4	4	6	3	2	99	7	6
c280	c280.a1	c280.a1.a2	Mapoly0003s0088.1.p	pacid=33010025 transcript=Mapoly0003s0088.1 locus=Mapoly0003s0088 ID=Mapoly0003s0088.1.v3.1 annot-version=v3.1	-16.2338	0.19708	15316.5	137	14	14	4	4	6	3	2	99	7	6
c280	c280.a1	c280.a1.a3	Mapoly0006s0250.1.p	pacid=33007294 transcript=Mapoly0006s0250.1 locus=Mapoly0006s0250 ID=Mapoly0006s0250.1.v3.1 annot-version=v3.1	-16.2338	0.19708	15316.5	137	14	14	4	4	6	3	2	99	7	6
c280	c280.a1	c280.a1.a4	Mapoly0037s0056.1.p	pacid=33008368 transcript=Mapoly0037s0056.1 locus=Mapoly0037s0056 ID=Mapoly0037s0056.1.v3.1 annot-version=v3.1	-16.2338	0.19708	15396.6	137	14	14	4	4	6	4	1.5	30.6228	7	6
c280	c280.a1	c280.a1.a5	Mapoly0102s0037.1.p	pacid=33007463 transcript=Mapoly0102s0037.1 locus=Mapoly0102s0037 ID=Mapoly0102s0037.1.v3.1 annot-version=v3.1	-16.2338	0.19708	15316.5	137	14	14	4	4	6	3	2	99	7	6
c280	c280.a1	c280.a1.a6	Mapoly0105s0008.1.p	pacid=33016146 transcript=Mapoly0105s0008.1 locus=Mapoly0105s0008 ID=Mapoly0105s0008.1.v3.1 annot-version=v3.1	-16.2338	0.19708	15396.6	137	14	14	4	4	6	4	1.5	30.6228	7	6
c280	c280.a1	c280.a1.a7	Mapoly0123s0001.1.p	pacid=33019019 transcript=Mapoly0123s0001.1 locus=Mapoly0123s0001 ID=Mapoly0123s0001.1.v3.1 annot-version=v3.1	-16.2338	0.19708	15316.5	137	14	14	4	4	6	3	2	99	7	6
c281	c281.a1	c281.a1.a1	Mapoly0052s0065.1.p	pacid=33026826 transcript=Mapoly0052s0065.1 locus=Mapoly0052s0065 ID=Mapoly0052s0065.1.v3.1 annot-version=v3.1	-12.0643	0.21084	18878.2	166	14	14	4	4	5	8	0.625	3.21697	1	6
c282	c282.a1	c282.a1.a1	Mapoly0040s0001.1.p	pacid=33020799 transcript=Mapoly0040s0001.1 locus=Mapoly0040s0001 ID=Mapoly0040s0001.1.v3.1 annot-version=v3.1	-26.3666	0.16173	39758.9	371	13	13	5	5	5	19	0.263158	0.832981	4	6
c282	c282.a1	c282.a1.a2	Mapoly0040s0001.2.p	pacid=33020800 transcript=Mapoly0040s0001.2 locus=Mapoly0040s0001 ID=Mapoly0040s0001.2.v3.1 annot-version=v3.1	-26.3666	0.16173	39758.9	371	13	13	5	5	5	19	0.263158	0.832981	4	6
c282	c282.a1	c282.a1.a3	Mapoly0072s0111.1.p	pacid=33008681 transcript=Mapoly0072s0111.1 locus=Mapoly0072s0111 ID=Mapoly0072s0111.1.v3.1 annot-version=v3.1	-26.3666	0.16173	39758.9	371	13	13	5	5	5	19	0.263158	0.832981	4	6
c282	c282.a1	c282.a1.a4	Mapoly0072s0113.1.p	pacid=33008588 transcript=Mapoly0072s0113.1 locus=Mapoly0072s0113 ID=Mapoly0072s0113.1.v3.1 annot-version=v3.1	-26.3666	0.16173	39758.9	371	13	13	5	5	5	19	0.263158	0.832981	4	6
c283	c283.a1	c283.a1.a1	Mapoly0094s0038.1.p	pacid=33005613 transcript=Mapoly0094s0038.1 locus=Mapoly0094s0038 ID=Mapoly0094s0038.1.v3.1 annot-version=v3.1	-28.8687	0.11387	51498.1	483	13	13	5	5	6	17	0.352941	1.25393	1	6
c284	c284.a1	c284.a1.a1	Mapoly0657s0001.1.p	pacid=33012148 transcript=Mapoly0657s0001.1 locus=Mapoly0657s0001 ID=Mapoly0657s0001.1.v3.1 annot-version=v3.1	-32.7165	0.15736	42959.6	394	13	13	5	5	5	18	0.277778	0.895736	1	4
c285	c285.a1	c285.a1.a1	Mapoly0014s0203.1.p	pacid=33015370 transcript=Mapoly0014s0203.1 locus=Mapoly0014s0203 ID=Mapoly0014s0203.1.v3.1 annot-version=v3.1	-34.361	0.2663	20676	184	12	12	4	4	7	6	1.16667	13.678	2	6
c285	c285.a1	c285.a1.a2	Mapoly0014s0203.2.p	pacid=33015371 transcript=Mapoly0014s0203.2 locus=Mapoly0014s0203 ID=Mapoly0014s0203.2.v3.1 annot-version=v3.1	-34.361	0.2663	20676	184	12	12	4	4	7	6	1.16667	13.678	2	6
c286	c286.a1	c286.a1.a1	Mapoly0055s0058.1.p	pacid=33010609 transcript=Mapoly0055s0058.1 locus=Mapoly0055s0058 ID=Mapoly0055s0058.1.v3.1 annot-version=v3.1	-28.6695	0.29911	25179.6	224	12	12	5	5	5	10	0.5	2.16228	2	7
c286	c286.a1	c286.a1.a2	Mapoly0055s0058.2.p	pacid=33010610 transcript=Mapoly0055s0058.2 locus=Mapoly0055s0058 ID=Mapoly0055s0058.2.v3.1 annot-version=v3.1	-28.6695	0.29911	25179.6	224	12	12	5	5	5	10	0.5	2.16228	2	7
c287	c287.a1	c287.a1.a1	Mapoly0004s0109.1.p	pacid=33015798 transcript=Mapoly0004s0109.1 locus=Mapoly0004s0109 ID=Mapoly0004s0109.1.v3.1 annot-version=v3.1	-46.4847	0.25237	34815.6	317	12	12	5	5	6	14	0.428571	1.6827	1	4
c288	c288.a1	c288.a1.a1	Mapoly0007s0048.1.p	pacid=33022298 transcript=Mapoly0007s0048.1 locus=Mapoly0007s0048 ID=Mapoly0007s0048.1.v3.1 annot-version=v3.1	-28.283	0.27638	22945.4	199	12	4	5	2	5	11	0.454545	1.84804	1	5
c288	c288.a2	c288.a2.a1	Mapoly0016s0131.1.p	pacid=33027024 transcript=Mapoly0016s0131.1 locus=Mapoly0016s0131 ID=Mapoly0016s0131.1.v3.1 annot-version=v3.1	-18.6469	0.19095	22958.4	199	14	6	4	1	4	11	0.363636	1.31013	1	6
c289	c289.a1	c289.a1.a1	Mapoly0033s0034.1.p	pacid=33003772 transcript=Mapoly0033s0034.1 locus=Mapoly0033s0034 ID=Mapoly0033s0034.1.v3.1 annot-version=v3.1	-16.2904	0.09881	55170.8	506	12	12	5	5	5	21	0.238095	0.730196	1	4
c290	c290.a1	c290.a1.a1	Mapoly0004s0012.1.p	pacid=33015616 transcript=Mapoly0004s0012.1 locus=Mapoly0004s0012 ID=Mapoly0004s0012.1.v3.1 annot-version=v3.1	-42.1834	0.10753	71371.4	651	11	11	5	5	5	24	0.208333	0.615598	1	5
c291	c291.a1	c291.a1.a1	Mapoly0014s0079.2.p	pacid=33015352 transcript=Mapoly0014s0079.2 locus=Mapoly0014s0079 ID=Mapoly0014s0079.2.v3.1 annot-version=v3.1	-13.4841	0.23214	12673.9	112	11	11	4	4	5	3	1.66667	45.4159	1	5
c292	c292.a1	c292.a1.a1	Mapoly0035s0068.1.p	pacid=33026153 transcript=Mapoly0035s0068.1 locus=Mapoly0035s0068 ID=Mapoly0035s0068.1.v3.1 annot-version=v3.1	-33.3593	0.26136	29827.9	264	11	11	4	4	5	14	0.357143	1.27585	1	5
c293	c293.a1	c293.a1.a1	Mapoly0037s0106.1.p	pacid=33008418 transcript=Mapoly0037s0106.1 locus=Mapoly0037s0106 ID=Mapoly0037s0106.1.v3.1 annot-version=v3.1	-22.4199	0.0969	57519.1	516	10	10	5	5	5	18	0.277778	0.895736	1	6
c294	c294.a1	c294.a1.a1	Mapoly0048s0080.1.p	pacid=33011458 transcript=Mapoly0048s0080.1 locus=Mapoly0048s0080 ID=Mapoly0048s0080.1.v3.1 annot-version=v3.1	-33.968	0.10614	64489.6	603	10	10	5	5	5	13	0.384615	1.42446	1	4
c295	c295.a1	c295.a1.a1	Mapoly0009s0124.1.p	pacid=33017222 transcript=Mapoly0009s0124.1 locus=Mapoly0009s0124 ID=Mapoly0009s0124.1.v3.1 annot-version=v3.1	-32.175	0.05858	104508	973	9	9	5	5	5	34	0.147059	0.403004	3	4
c295	c295.a1	c295.a1.a2	Mapoly0009s0124.2.p	pacid=33017224 transcript=Mapoly0009s0124.2 locus=Mapoly0009s0124 ID=Mapoly0009s0124.2.v3.1 annot-version=v3.1	-32.175	0.05858	104508	973	9	9	5	5	5	34	0.147059	0.403004	3	4
c295	c295.a1	c295.a1.a3	Mapoly0009s0124.3.p	pacid=33017223 transcript=Mapoly0009s0124.3 locus=Mapoly0009s0124 ID=Mapoly0009s0124.3.v3.1 annot-version=v3.1	-32.175	0.05858	104508	973	9	9	5	5	5	34	0.147059	0.403004	3	4
c296	c296.a1	c296.a1.a1	Mapoly0001s0152.1.p	pacid=33020338 transcript=Mapoly0001s0152.1 locus=Mapoly0001s0152 ID=Mapoly0001s0152.1.v3.1 annot-version=v3.1	-20.363	0.1136	61636.2	581	9	9	5	5	5	12	0.416667	1.61016	1	5
c297	c297.a1	c297.a1.a1	Mapoly0043s0096.1.p	pacid=33021093 transcript=Mapoly0043s0096.1 locus=Mapoly0043s0096 ID=Mapoly0043s0096.1.v3.1 annot-version=v3.1	-29.0973	0.09833	51803.4	478	9	9	5	5	5	21	0.238095	0.730196	1	3
c298	c298.a1	c298.a1.a1	Mapoly0151s0025.1.p	pacid=33008112 transcript=Mapoly0151s0025.1 locus=Mapoly0151s0025 ID=Mapoly0151s0025.1.v3.1 annot-version=v3.1	-26.9157	0.12195	54119.1	492	9	9	5	5	5	18	0.277778	0.895736	1	4
c299	c299.a1	c299.a1.a1	Mapoly0034s0131.1.p	pacid=33024546 transcript=Mapoly0034s0131.1 locus=Mapoly0034s0131 ID=Mapoly0034s0131.1.v3.1 annot-version=v3.1	-29.478	0.05656	128443	1220	8	8	5	5	5	58	0.0862069	0.21957	3	2
c299	c299.a1	c299.a1.a2	Mapoly0034s0131.4.p	pacid=33024548 transcript=Mapoly0034s0131.4 locus=Mapoly0034s0131 ID=Mapoly0034s0131.4.v3.1 annot-version=v3.1	-29.478	0.05656	128443	1220	8	8	5	5	5	58	0.0862069	0.21957	3	2
c299	c299.a1	c299.a1.a3	Mapoly0034s0131.5.p	pacid=33024547 transcript=Mapoly0034s0131.5 locus=Mapoly0034s0131 ID=Mapoly0034s0131.5.v3.1 annot-version=v3.1	-29.478	0.05656	128443	1220	8	8	5	5	5	58	0.0862069	0.21957	3	2
c300	c300.a1	c300.a1.a1	Mapoly0036s0018.1.p	pacid=33024129 transcript=Mapoly0036s0018.1 locus=Mapoly0036s0018 ID=Mapoly0036s0018.1.v3.1 annot-version=v3.1	-20.967	0.32624	16172.8	141	8	8	4	4	5	9	0.555556	2.59381	2	5
c300	c300.a1	c300.a1.a2	Mapoly0179s0010.1.p	pacid=33009558 transcript=Mapoly0179s0010.1 locus=Mapoly0179s0010 ID=Mapoly0179s0010.1.v3.1 annot-version=v3.1	-20.967	0.31724	16542.9	145	8	8	4	4	5	9	0.555556	2.59381	2	5
c301	c301.a1	c301.a1.a1	Mapoly0007s0214.1.p	pacid=33022414 transcript=Mapoly0007s0214.1 locus=Mapoly0007s0214 ID=Mapoly0007s0214.1.v3.1 annot-version=v3.1	-34.3189	0.15957	40725.5	376	8	8	5	5	5	18	0.277778	0.895736	1	4
c302	c302.a1	c302.a1.a1	Mapoly0068s0045.1.p	pacid=33024883 transcript=Mapoly0068s0045.1 locus=Mapoly0068s0045 ID=Mapoly0068s0045.1.v3.1 annot-version=v3.1	-28.1417	0.12554	49332.9	462	8	8	5	5	5	15	0.333333	1.15443	1	4
c303	c303.a1	c303.a1.a1	Mapoly0099s0042.1.p	pacid=33025041 transcript=Mapoly0099s0042.1 locus=Mapoly0099s0042 ID=Mapoly0099s0042.1.v3.1 annot-version=v3.1	-36.8913	0.52679	12134.3	112	8	8	5	5	5	5	1	9	1	5
c304	c304.a1	c304.a1.a1	Mapoly0114s0016.1.p	pacid=33004097 transcript=Mapoly0114s0016.1 locus=Mapoly0114s0016 ID=Mapoly0114s0016.1.v3.1 annot-version=v3.1	-22.6556	0.09444	60506.1	540	8	8	5	5	5	22	0.227273	0.687612	1	2
c305	c305.a1	c305.a1.a1	Mapoly0004s0248.1.p	pacid=33015905 transcript=Mapoly0004s0248.1 locus=Mapoly0004s0248 ID=Mapoly0004s0248.1.v3.1 annot-version=v3.1	-24.4866	0.12274	53493.7	497	7	7	5	5	6	21	0.285714	0.930698	1	2
c306	c306.a1	c306.a1.a1	Mapoly0015s0129.1.p	pacid=33019365 transcript=Mapoly0015s0129.1 locus=Mapoly0015s0129 ID=Mapoly0015s0129.1.v3.1 annot-version=v3.1	-23.6881	0.14689	37284.9	354	7	6	4	3	5	13	0.384615	1.42446	1	4
c306	c306.a2	c306.a2.a1	Mapoly0068s0019.1.p	pacid=33024936 transcript=Mapoly0068s0019.1 locus=Mapoly0068s0019 ID=Mapoly0068s0019.1.v3.1 annot-version=v3.1	-13.3888	0.08612	43313.7	418	9	8	3	2	3	18	0.166667	0.467799	2	7
c306	c306.a2	c306.a2.a2	Mapoly0068s0019.2.p	pacid=33024937 transcript=Mapoly0068s0019.2 locus=Mapoly0068s0019 ID=Mapoly0068s0019.2.v3.1 annot-version=v3.1	-13.3888	0.08612	43313.7	418	9	8	3	2	3	18	0.166667	0.467799	2	7
c307	c307.a1	c307.a1.a1	Mapoly0019s0065.1.p	pacid=33011182 transcript=Mapoly0019s0065.1 locus=Mapoly0019s0065 ID=Mapoly0019s0065.1.v3.1 annot-version=v3.1	-21.2169	0.10067	64203.8	596	7	7	5	5	5	21	0.238095	0.730196	1	3
c308	c308.a1	c308.a1.a1	Mapoly0013s0141.1.p	pacid=33012324 transcript=Mapoly0013s0141.1 locus=Mapoly0013s0141 ID=Mapoly0013s0141.1.v3.1 annot-version=v3.1	-27.7325	0.07117	92695	843	6	6	5	5	5	38	0.131579	0.353876	1	3
c309	c309.a1	c309.a1.a1	Mapoly0033s0043.1.p	pacid=33003860 transcript=Mapoly0033s0043.1 locus=Mapoly0033s0043 ID=Mapoly0033s0043.1.v3.1 annot-version=v3.1	-25.5024	0.16798	40654.5	381	6	6	5	5	5	15	0.333333	1.15443	1	2
c310	c310.a1	c310.a1.a1	Mapoly0067s0081.1.p	pacid=33019750 transcript=Mapoly0067s0081.1 locus=Mapoly0067s0081 ID=Mapoly0067s0081.1.v3.1 annot-version=v3.1	-24.9108	0.09673	72875	672	6	6	5	5	5	26	0.192308	0.557068	1	4
c311	c311.a1	c311.a1.a1	Mapoly0103s0033.1.p	pacid=33013270 transcript=Mapoly0103s0033.1 locus=Mapoly0103s0033 ID=Mapoly0103s0033.1.v3.1 annot-version=v3.1	-41.7399	0.15652	24913.7	230	52	52	3	3	5	6	0.833333	5.81292	1	9
c312	c312.a1	c312.a1.a1	Mapoly0033s0033.1.p	pacid=33003808 transcript=Mapoly0033s0033.1 locus=Mapoly0033s0033 ID=Mapoly0033s0033.1.v3.1 annot-version=v3.1	-25.5183	0.15018	28141.5	273	35	35	4	4	6	6	1	9	1	9
c313	c313.a1	c313.a1.a1	Mapoly0025s0139.1.p	pacid=33027390 transcript=Mapoly0025s0139.1 locus=Mapoly0025s0139 ID=Mapoly0025s0139.1.v3.1 annot-version=v3.1	-30.2741	0.08721	55212.4	516	33	33	4	4	4	7	0.571429	2.72759	1	9
c314	c314.a1	c314.a1.a1	Mapoly0117s0013.1.p	pacid=33027479 transcript=Mapoly0117s0013.1 locus=Mapoly0117s0013 ID=Mapoly0117s0013.1.v3.1 annot-version=v3.1	-17.1871	0.13661	19844	183	25	25	2	2	5	5	1	9	1	7
c315	c315.a1	c315.a1.a1	Mapoly0088s0069.1.p	pacid=33011981 transcript=Mapoly0088s0069.1 locus=Mapoly0088s0069 ID=Mapoly0088s0069.1.v3.1 annot-version=v3.1	-21.1483	0.09011	49783.6	455	21	21	3	3	4	10	0.4	1.51189	1	9
c316	c316.a1	c316.a1.a1	Mapoly0014s0048.3.p	pacid=33015379 transcript=Mapoly0014s0048.3 locus=Mapoly0014s0048 ID=Mapoly0014s0048.3.v3.1 annot-version=v3.1	-44.2982	0.24107	24644.7	224	20	20	4	4	5	9	0.555556	2.59381	2	8
c316	c316.a1	c316.a1.a2	Mapoly0014s0048.4.p	pacid=33015377 transcript=Mapoly0014s0048.4 locus=Mapoly0014s0048 ID=Mapoly0014s0048.4.v3.1 annot-version=v3.1	-44.2982	0.19565	29618.4	276	20	20	4	4	5	8	0.625	3.21697	2	8
c317	c317.a1	c317.a1.a1	Mapoly0045s0102.1.p	pacid=33015136 transcript=Mapoly0045s0102.1 locus=Mapoly0045s0102 ID=Mapoly0045s0102.1.v3.1 annot-version=v3.1	-31.1421	0.29814	17481.7	161	19	19	4	4	4	8	0.5	2.16228	1	9
c318	c318.a1	c318.a1.a1	Mapoly0015s0161.1.p	pacid=33019526 transcript=Mapoly0015s0161.1 locus=Mapoly0015s0161 ID=Mapoly0015s0161.1.v3.1 annot-version=v3.1	-24.3087	0.07646	53179.6	497	18	18	4	4	5	7	0.714286	4.17947	1	8
c319	c319.a1	c319.a1.a1	Mapoly0031s0092.1.p	pacid=33022802 transcript=Mapoly0031s0092.1 locus=Mapoly0031s0092 ID=Mapoly0031s0092.1.v3.1 annot-version=v3.1	-17.095	0.23944	15827	142	18	18	3	3	5	7	0.714286	4.17947	1	6
c320	c320.a1	c320.a1.a1	Mapoly0377s0002.1.p	pacid=33016385 transcript=Mapoly0377s0002.1 locus=Mapoly0377s0002 ID=Mapoly0377s0002.1.v3.1 annot-version=v3.1	-18.1341	0.14222	23949.3	225	18	18	4	4	4	4	1	9	1	8
c321	c321.a1	c321.a1.a1	Mapoly0077s0065.1.p	pacid=33019205 transcript=Mapoly0077s0065.1 locus=Mapoly0077s0065 ID=Mapoly0077s0065.1.v3.1 annot-version=v3.1	-32.4614	0.27976	18073.4	168	17	17	3	3	5	5	1	9	1	7
c322	c322.a1	c322.a1.a1		SERUM ALBUMIN PRECURSOR.	-20.2698	0.08539	69321.5	609	17	17	4	4	5	33	0.151515	0.417474	1	8
c323	c323.a1	c323.a1.a1	Mapoly0065s0007.1.p	pacid=33004432 transcript=Mapoly0065s0007.1 locus=Mapoly0065s0007 ID=Mapoly0065s0007.1.v3.1 annot-version=v3.1	-28.3958	0.15985	28255.8	269	14	14	4	4	4	12	0.333333	1.15443	1	7
c324	c324.a1	c324.a1.a1	Mapoly0087s0068.1.p	pacid=33025544 transcript=Mapoly0087s0068.1 locus=Mapoly0087s0068 ID=Mapoly0087s0068.1.v3.1 annot-version=v3.1	-30.7328	0.19577	20399.6	189	14	14	3	3	4	2	2	99	1	6
c325	c325.a1	c325.a1.a1	Mapoly0188s0011.1.p	pacid=33024310 transcript=Mapoly0188s0011.1 locus=Mapoly0188s0011 ID=Mapoly0188s0011.1.v3.1 annot-version=v3.1	-15.2995	0.14741	27686	251	13	13	4	4	5	10	0.5	2.16228	2	6
c325	c325.a1	c325.a1.a2	Mapoly0188s0011.2.p	pacid=33024311 transcript=Mapoly0188s0011.2 locus=Mapoly0188s0011 ID=Mapoly0188s0011.2.v3.1 annot-version=v3.1	-15.2995	0.14741	27686	251	13	13	4	4	5	10	0.5	2.16228	2	6
c326	c326.a1	c326.a1.a1	Mapoly0028s0093.1.p	pacid=33018230 transcript=Mapoly0028s0093.1 locus=Mapoly0028s0093 ID=Mapoly0028s0093.1.v3.1 annot-version=v3.1	-36.111	0.21134	20931.7	194	13	13	4	4	5	8	0.625	3.21697	1	5
c327	c327.a1	c327.a1.a1	Mapoly0013s0204.1.p	pacid=33012371 transcript=Mapoly0013s0204.1 locus=Mapoly0013s0204 ID=Mapoly0013s0204.1.v3.1 annot-version=v3.1	-23.3856	0.17703	22879.2	209	12	12	4	4	4	11	0.363636	1.31013	1	6
c328	c328.a1	c328.a1.a1	Mapoly0025s0074.1.p	pacid=33027290 transcript=Mapoly0025s0074.1 locus=Mapoly0025s0074 ID=Mapoly0025s0074.1.v3.1 annot-version=v3.1	-25.1341	0.21302	18904.6	169	11	11	4	4	4	7	0.571429	2.72759	1	6
c329	c329.a1	c329.a1.a1	Mapoly0030s0040.1.p	pacid=33006825 transcript=Mapoly0030s0040.1 locus=Mapoly0030s0040 ID=Mapoly0030s0040.1.v3.1 annot-version=v3.1	-17.7687	0.32836	15410.6	134	11	11	4	4	4	6	0.666667	3.64159	1	6
c330	c330.a1	c330.a1.a1	Mapoly0147s0018.1.p	pacid=33024758 transcript=Mapoly0147s0018.1 locus=Mapoly0147s0018 ID=Mapoly0147s0018.1.v3.1 annot-version=v3.1	-27.0125	0.26214	22165	206	11	11	4	4	4	10	0.4	1.51189	1	6
c331	c331.a1	c331.a1.a1	Mapoly0025s0006.1.p	pacid=33027283 transcript=Mapoly0025s0006.1 locus=Mapoly0025s0006 ID=Mapoly0025s0006.1.v3.1 annot-version=v3.1	-23.7297	0.0918	55344	512	10	10	4	4	4	15	0.266667	0.84785	1	7
c332	c332.a1	c332.a1.a1	Mapoly0034s0016.1.p	pacid=33024601 transcript=Mapoly0034s0016.1 locus=Mapoly0034s0016 ID=Mapoly0034s0016.1.v3.1 annot-version=v3.1	-16.7386	0.07416	49666.3	445	10	10	4	4	4	25	0.16	0.44544	1	6
c333	c333.a1	c333.a1.a1	Mapoly0054s0095.1.p	pacid=33017395 transcript=Mapoly0054s0095.1 locus=Mapoly0054s0095 ID=Mapoly0054s0095.1.v3.1 annot-version=v3.1	-22.2737	0.07264	72036.1	647	10	10	4	4	4	25	0.16	0.44544	1	6
c334	c334.a1	c334.a1.a1	Mapoly0120s0047.1.p	pacid=33019647 transcript=Mapoly0120s0047.1 locus=Mapoly0120s0047 ID=Mapoly0120s0047.1.v3.1 annot-version=v3.1	-26.8825	0.10638	53571.9	470	9	9	4	4	4	18	0.222222	0.668101	3	6
c334	c334.a1	c334.a1.a2	Mapoly0120s0047.2.p	pacid=33019648 transcript=Mapoly0120s0047.2 locus=Mapoly0120s0047 ID=Mapoly0120s0047.2.v3.1 annot-version=v3.1	-26.8825	0.11161	51202.6	448	9	9	4	4	4	17	0.235294	0.719072	3	6
c334	c334.a1	c334.a1.a3	Mapoly0120s0047.3.p	pacid=33019649 transcript=Mapoly0120s0047.3 locus=Mapoly0120s0047 ID=Mapoly0120s0047.3.v3.1 annot-version=v3.1	-26.8825	0.13405	42555.3	373	9	9	4	4	4	18	0.222222	0.668101	3	6
c335	c335.a1	c335.a1.a1	Mapoly0005s0291.1.p	pacid=33003195 transcript=Mapoly0005s0291.1 locus=Mapoly0005s0291 ID=Mapoly0005s0291.1.v3.1 annot-version=v3.1	-32.141	0.16224	36854.8	339	9	9	4	4	4	15	0.266667	0.84785	2	4
c335	c335.a1	c335.a1.a2	Mapoly0005s0291.2.p	pacid=33003196 transcript=Mapoly0005s0291.2 locus=Mapoly0005s0291 ID=Mapoly0005s0291.2.v3.1 annot-version=v3.1	-32.141	0.16224	36854.8	339	9	9	4	4	4	15	0.266667	0.84785	2	4
c336	c336.a1	c336.a1.a1	Mapoly0080s0007.1.p	pacid=33023834 transcript=Mapoly0080s0007.1 locus=Mapoly0080s0007 ID=Mapoly0080s0007.1.v3.1 annot-version=v3.1	-8.89359	0.24615	14658.7	130	9	9	3	3	4	6	0.666667	3.64159	1	7
c337	c337.a1	c337.a1.a1	Mapoly0168s0012.1.p	pacid=33006074 transcript=Mapoly0168s0012.1 locus=Mapoly0168s0012 ID=Mapoly0168s0012.1.v3.1 annot-version=v3.1	-30.1592	0.14557	36289	316	9	9	4	4	4	13	0.307692	1.03092	1	4
c338	c338.a1	c338.a1.a1	Mapoly0183s0014.1.p	pacid=33025915 transcript=Mapoly0183s0014.1 locus=Mapoly0183s0014 ID=Mapoly0183s0014.1.v3.1 annot-version=v3.1	-28.3315	0.18531	30835.7	286	9	9	4	4	4	13	0.307692	1.03092	1	6
c339	c339.a1	c339.a1.a1	Mapoly0080s0086.1.p	pacid=33023763 transcript=Mapoly0080s0086.1 locus=Mapoly0080s0086 ID=Mapoly0080s0086.1.v3.1 annot-version=v3.1	-30.8427	0.13462	46946	416	8	8	4	4	4	13	0.307692	1.03092	1	4
c340	c340.a1	c340.a1.a1	Mapoly0084s0088.1.p	pacid=33025642 transcript=Mapoly0084s0088.1 locus=Mapoly0084s0088 ID=Mapoly0084s0088.1.v3.1 annot-version=v3.1	-32.0388	0.27488	22459.7	211	8	8	4	4	5	7	0.714286	4.17947	1	6
c341	c341.a1	c341.a1.a1	Mapoly0121s0040.1.p	pacid=33026858 transcript=Mapoly0121s0040.1 locus=Mapoly0121s0040 ID=Mapoly0121s0040.1.v3.1 annot-version=v3.1	-37.169	0.2328	20466.3	189	8	8	4	4	4	8	0.5	2.16228	1	3
c342	c342.a1	c342.a1.a1	Mapoly0113s0004.1.p	pacid=33005161 transcript=Mapoly0113s0004.1 locus=Mapoly0113s0004 ID=Mapoly0113s0004.1.v3.1 annot-version=v3.1	-14.7336	0.0457	102898	941	7	7	4	4	4	45	0.0888889	0.227125	3	5
c342	c342.a1	c342.a1.a2	Mapoly0113s0004.2.p	pacid=33005162 transcript=Mapoly0113s0004.2 locus=Mapoly0113s0004 ID=Mapoly0113s0004.2.v3.1 annot-version=v3.1	-14.7336	0.0457	102898	941	7	7	4	4	4	45	0.0888889	0.227125	3	5
c342	c342.a1	c342.a1.a3	Mapoly0113s0004.3.p	pacid=33005163 transcript=Mapoly0113s0004.3 locus=Mapoly0113s0004 ID=Mapoly0113s0004.3.v3.1 annot-version=v3.1	-14.7336	0.0457	102898	941	7	7	4	4	4	45	0.0888889	0.227125	3	5
c343	c343.a1	c343.a1.a1	Mapoly0002s0308.1.p	pacid=33023521 transcript=Mapoly0002s0308.1 locus=Mapoly0002s0308 ID=Mapoly0002s0308.1.v3.1 annot-version=v3.1	-18.1413	0.06112	90565.1	818	7	7	4	4	4	35	0.114286	0.301025	2	3
c343	c343.a1	c343.a1.a2	Mapoly0029s0002.1.p	pacid=33014758 transcript=Mapoly0029s0002.1 locus=Mapoly0029s0002 ID=Mapoly0029s0002.1.v3.1 annot-version=v3.1	-18.1413	0.06211	89276.5	805	7	7	4	4	4	35	0.114286	0.301025	2	3
c344	c344.a1	c344.a1.a1	Mapoly0002s0232.1.p	pacid=33023345 transcript=Mapoly0002s0232.1 locus=Mapoly0002s0232 ID=Mapoly0002s0232.1.v3.1 annot-version=v3.1	-12.5169	0.10851	50602.8	470	7	7	4	4	4	23	0.173913	0.492496	1	3
c345	c345.a1	c345.a1.a1	Mapoly0031s0108.1.p	pacid=33022786 transcript=Mapoly0031s0108.1 locus=Mapoly0031s0108 ID=Mapoly0031s0108.1.v3.1 annot-version=v3.1	-23.5598	0.08247	73279	679	7	7	4	4	4	29	0.137931	0.373824	1	3
c346	c346.a1	c346.a1.a1	Mapoly0044s0060.1.p	pacid=33012882 transcript=Mapoly0044s0060.1 locus=Mapoly0044s0060 ID=Mapoly0044s0060.1.v3.1 annot-version=v3.1	-23.9787	0.12879	43728.9	396	7	7	4	4	4	14	0.285714	0.930698	1	5
c347	c347.a1	c347.a1.a1	Mapoly0018s0008.1.p	pacid=33008540 transcript=Mapoly0018s0008.1 locus=Mapoly0018s0008 ID=Mapoly0018s0008.1.v3.1 annot-version=v3.1	-17.7987	0.18349	24127.3	218	6	6	4	4	4	14	0.285714	0.930698	2	3
c347	c347.a1	c347.a1.a2	MapolyY_A0041.1.p	pacid=33010339 transcript=MapolyY_A0041.1 locus=MapolyY_A0041 ID=MapolyY_A0041.1.v3.1 annot-version=v3.1	-17.7987	0.18349	24127.3	218	6	6	4	4	4	14	0.285714	0.930698	2	3
c348	c348.a1	c348.a1.a1	Mapoly0001s0099.1.p	pacid=33020050 transcript=Mapoly0001s0099.1 locus=Mapoly0001s0099 ID=Mapoly0001s0099.1.v3.1 annot-version=v3.1	-32.3098	0.13817	45908.5	427	6	6	4	4	4	25	0.16	0.44544	1	5
c349	c349.a1	c349.a1.a1	Mapoly0005s0074.1.p	pacid=33003177 transcript=Mapoly0005s0074.1 locus=Mapoly0005s0074 ID=Mapoly0005s0074.1.v3.1 annot-version=v3.1	-21.8904	0.08958	51283.5	480	6	6	3	3	4	22	0.181818	0.519911	1	3
c350	c350.a1	c350.a1.a1	Mapoly0018s0004.1.p	pacid=33008527 transcript=Mapoly0018s0004.1 locus=Mapoly0018s0004 ID=Mapoly0018s0004.1.v3.1 annot-version=v3.1	-14.0749	0.11007	46294.7	427	6	6	4	4	4	16	0.25	0.778279	1	3
c351	c351.a1	c351.a1.a1	Mapoly0029s0022.1.p	pacid=33014724 transcript=Mapoly0029s0022.1 locus=Mapoly0029s0022 ID=Mapoly0029s0022.1.v3.1 annot-version=v3.1	-22.1587	0.09687	36031	351	6	6	3	3	4	16	0.25	0.778279	1	3
c352	c352.a1	c352.a1.a1	Mapoly0037s0010.1.p	pacid=33008400 transcript=Mapoly0037s0010.1 locus=Mapoly0037s0010 ID=Mapoly0037s0010.1.v3.1 annot-version=v3.1	-18.6797	0.08379	61507.1	549	6	6	4	4	4	19	0.210526	0.623777	1	4
c353	c353.a1	c353.a1.a1	Mapoly0073s0007.1.p	pacid=33005714 transcript=Mapoly0073s0007.1 locus=Mapoly0073s0007 ID=Mapoly0073s0007.1.v3.1 annot-version=v3.1	-15.1288	0.05284	85565	776	6	6	4	4	4	32	0.125	0.333521	1	3
c354	c354.a1	c354.a1.a1	Mapoly0193s0018.1.p	pacid=33008244 transcript=Mapoly0193s0018.1 locus=Mapoly0193s0018 ID=Mapoly0193s0018.1.v3.1 annot-version=v3.1	-16.8599	0.24084	20393.7	191	6	6	4	4	4	9	0.444444	1.78256	1	4
c355	c355.a1	c355.a1.a1	Mapoly0007s0067.1.p	pacid=33022180 transcript=Mapoly0007s0067.1 locus=Mapoly0007s0067 ID=Mapoly0007s0067.1.v3.1 annot-version=v3.1	-21.0393	0.25123	22406.2	203	5	5	4	4	4	13	0.307692	1.03092	2	3
c355	c355.a1	c355.a1.a2	Mapoly0072s0030.1.p	pacid=33008566 transcript=Mapoly0072s0030.1 locus=Mapoly0072s0030 ID=Mapoly0072s0030.1.v3.1 annot-version=v3.1	-21.0393	0.25123	22463.3	203	5	5	4	4	4	11	0.363636	1.31013	2	3
c356	c356.a1	c356.a1.a1	Mapoly0005s0125.1.p	pacid=33003390 transcript=Mapoly0005s0125.1 locus=Mapoly0005s0125 ID=Mapoly0005s0125.1.v3.1 annot-version=v3.1	-18.0212	0.11584	46333.6	423	5	5	4	4	4	19	0.210526	0.623777	1	3
c357	c357.a1	c357.a1.a1	Mapoly0034s0048.1.p	pacid=33024622 transcript=Mapoly0034s0048.1 locus=Mapoly0034s0048 ID=Mapoly0034s0048.1.v3.1 annot-version=v3.1	-26.2439	0.05063	118810	1106	5	5	4	4	4	32	0.125	0.333521	1	2
c358	c358.a1	c358.a1.a1	Mapoly0156s0015.1.p	pacid=33010210 transcript=Mapoly0156s0015.1 locus=Mapoly0156s0015 ID=Mapoly0156s0015.1.v3.1 annot-version=v3.1	-18.3299	0.06071	60458.5	560	5	5	3	3	4	23	0.173913	0.492496	1	4
c359	c359.a1	c359.a1.a1	Mapoly0005s0206.1.p	pacid=33003381 transcript=Mapoly0005s0206.1 locus=Mapoly0005s0206 ID=Mapoly0005s0206.1.v3.1 annot-version=v3.1	-22.0444	0.11697	47021.7	436	4	4	4	4	4	23	0.173913	0.492496	1	3
c360	c360.a1	c360.a1.a1	Mapoly0011s0190.1.p	pacid=33017910 transcript=Mapoly0011s0190.1 locus=Mapoly0011s0190 ID=Mapoly0011s0190.1.v3.1 annot-version=v3.1	-22.5663	0.0508	114945	1004	4	4	4	4	4	42	0.0952381	0.245197	1	2
c361	c361.a1	c361.a1.a1	Mapoly0016s0186.1.p	pacid=33027030 transcript=Mapoly0016s0186.1 locus=Mapoly0016s0186 ID=Mapoly0016s0186.1.v3.1 annot-version=v3.1	-15.7692	0.03905	117550	1050	4	4	4	4	4	46	0.0869565	0.221677	1	2
c362	c362.a1	c362.a1.a1	Mapoly0191s0001.1.p	pacid=33013735 transcript=Mapoly0191s0001.1 locus=Mapoly0191s0001 ID=Mapoly0191s0001.1.v3.1 annot-version=v3.1	-19.7126	0.03588	112145	1059	4	4	3	3	4	39	0.102564	0.26638	1	1
c363	c363.a1	c363.a1.a1	Mapoly0066s0038.1.p	pacid=33005962 transcript=Mapoly0066s0038.1 locus=Mapoly0066s0038 ID=Mapoly0066s0038.1.v3.1 annot-version=v3.1	-36.0501	0.13725	32862.4	306	29	29	3	3	5	8	0.625	3.21697	1	9
c364	c364.a1	c364.a1.a1	Mapoly0009s0083.1.p	pacid=33017123 transcript=Mapoly0009s0083.1 locus=Mapoly0009s0083 ID=Mapoly0009s0083.1.v3.1 annot-version=v3.1	-25.5224	0.12575	35433.9	334	19	19	3	3	3	7	0.428571	1.6827	1	9
c365	c365.a1	c365.a1.a1	Mapoly0158s0015.1.p	pacid=33010466 transcript=Mapoly0158s0015.1 locus=Mapoly0158s0015 ID=Mapoly0158s0015.1.v3.1 annot-version=v3.1	-24.7213	0.28	13598.4	125	18	18	3	3	5	5	1	9	1	9
c366	c366.a1	c366.a1.a1	Mapoly0022s0141.1.p	pacid=33010963 transcript=Mapoly0022s0141.1 locus=Mapoly0022s0141 ID=Mapoly0022s0141.1.v3.1 annot-version=v3.1	-31.4517	0.07512	46789.1	426	17	17	3	3	3	15	0.2	0.584893	1	8
c367	c367.a1	c367.a1.a1	Mapoly0447s0001.1.p	pacid=33024837 transcript=Mapoly0447s0001.1 locus=Mapoly0447s0001 ID=Mapoly0447s0001.1.v3.1 annot-version=v3.1	-11.1397	0.10169	19973	177	17	17	2	2	4	5	0.8	5.30957	1	8
c368	c368.a1	c368.a1.a1	Mapoly0061s0088.1.p	pacid=33026095 transcript=Mapoly0061s0088.1 locus=Mapoly0061s0088 ID=Mapoly0061s0088.1.v3.1 annot-version=v3.1	-23.1273	0.07657	45984.3	431	15	15	3	3	4	13	0.307692	1.03092	1	7
c369	c369.a1	c369.a1.a1	Mapoly0016s0141.1.p	pacid=33027082 transcript=Mapoly0016s0141.1 locus=Mapoly0016s0141 ID=Mapoly0016s0141.1.v3.1 annot-version=v3.1	-19.5366	0.06498	60528.2	554	14	14	3	3	3	18	0.166667	0.467799	1	7
c370	c370.a1	c370.a1.a1	Mapoly0117s0048.1.p	pacid=33027560 transcript=Mapoly0117s0048.1 locus=Mapoly0117s0048 ID=Mapoly0117s0048.1.v3.1 annot-version=v3.1	-24.2291	0.24419	19013	172	14	14	3	3	3	5	0.6	2.98107	1	7
c371	c371.a1	c371.a1.a1	Mapoly0147s0023.1.p	pacid=33024826 transcript=Mapoly0147s0023.1 locus=Mapoly0147s0023 ID=Mapoly0147s0023.1.v3.1 annot-version=v3.1	-22.0586	0.09813	45559.9	428	14	14	3	3	3	23	0.130435	0.350314	1	7
c372	c372.a1	c372.a1.a1	Mapoly0016s0185.1.p	pacid=33027013 transcript=Mapoly0016s0185.1 locus=Mapoly0016s0185 ID=Mapoly0016s0185.1.v3.1 annot-version=v3.1	-14.082	0.10375	37828.1	347	13	13	3	3	3	10	0.3	0.995262	1	8
c373	c373.a1	c373.a1.a1	Mapoly0021s0041.1.p	pacid=33007745 transcript=Mapoly0021s0041.1 locus=Mapoly0021s0041 ID=Mapoly0021s0041.1.v3.1 annot-version=v3.1	-14.9416	0.06118	48525	425	13	13	3	3	3	13	0.230769	0.701254	1	6
c374	c374.a1	c374.a1.a1	Mapoly0037s0132.1.p	pacid=33008358 transcript=Mapoly0037s0132.1 locus=Mapoly0037s0132 ID=Mapoly0037s0132.1.v3.1 annot-version=v3.1	-11.1965	0.04612	53248.6	477	13	13	2	2	3	15	0.2	0.584893	1	9
c375	c375.a1	c375.a1.a1	Mapoly0148s0016.1.p	pacid=33012131 transcript=Mapoly0148s0016.1 locus=Mapoly0148s0016 ID=Mapoly0148s0016.1.v3.1 annot-version=v3.1	-22.7933	0.19512	13805.8	123	13	13	3	3	4	4	1	9	1	6
c376	c376.a1	c376.a1.a1	Mapoly0118s0049.1.p	pacid=33019611 transcript=Mapoly0118s0049.1 locus=Mapoly0118s0049 ID=Mapoly0118s0049.1.v3.1 annot-version=v3.1	-26.5177	0.29787	16219	141	12	4	3	1	4	7	0.571429	2.72759	2	5
c376	c376.a1	c376.a1.a2	Mapoly0329s0001.1.p	pacid=33011464 transcript=Mapoly0329s0001.1 locus=Mapoly0329s0001 ID=Mapoly0329s0001.1.v3.1 annot-version=v3.1	-26.5177	0.29787	16245	141	12	4	3	1	4	7	0.571429	2.72759	2	5
c376	c376.a2	c376.a2.a1	Mapoly0118s0045.1.p	pacid=33019590 transcript=Mapoly0118s0045.1 locus=Mapoly0118s0045 ID=Mapoly0118s0045.1.v3.1 annot-version=v3.1	-19.4057	0.29787	16248	141	9	1	3	1	3	7	0.428571	1.6827	2	5
c376	c376.a2	c376.a2.a2	Mapoly0970s0001.1.p	pacid=33014575 transcript=Mapoly0970s0001.1 locus=Mapoly0970s0001 ID=Mapoly0970s0001.1.v3.1 annot-version=v3.1	-19.4057	0.29787	16274	141	9	1	3	1	3	7	0.428571	1.6827	2	5
c377	c377.a1	c377.a1.a1	Mapoly0074s0005.1.p	pacid=33027733 transcript=Mapoly0074s0005.1 locus=Mapoly0074s0005 ID=Mapoly0074s0005.1.v3.1 annot-version=v3.1	-17.8239	0.06339	53846.3	489	12	12	3	3	4	10	0.4	1.51189	1	7
c378	c378.a1	c378.a1.a1	Mapoly0115s0066.1.p	pacid=33007314 transcript=Mapoly0115s0066.1 locus=Mapoly0115s0066 ID=Mapoly0115s0066.1.v3.1 annot-version=v3.1	-24.989	0.10456	39846.9	373	12	12	3	3	3	7	0.428571	1.6827	1	6
c379	c379.a1	c379.a1.a1	Mapoly0214s0006.1.p	pacid=33016393 transcript=Mapoly0214s0006.1 locus=Mapoly0214s0006 ID=Mapoly0214s0006.1.v3.1 annot-version=v3.1	-20.4449	0.09366	38718.1	363	12	12	3	3	4	12	0.333333	1.15443	1	7
c380	c380.a1	c380.a1.a1	Mapoly0027s0079.1.p	pacid=33021397 transcript=Mapoly0027s0079.1 locus=Mapoly0027s0079 ID=Mapoly0027s0079.1.v3.1 annot-version=v3.1	-29.6904	0.13065	41027.1	398	11	11	3	3	3	5	0.6	2.98107	3	9
c380	c380.a1	c380.a1.a2	Mapoly0027s0080.1.p	pacid=33021517 transcript=Mapoly0027s0080.1 locus=Mapoly0027s0080 ID=Mapoly0027s0080.1.v3.1 annot-version=v3.1	-29.6904	0.13065	41041.2	398	11	11	3	3	3	5	0.6	2.98107	3	9
c380	c380.a1	c380.a1.a3	Mapoly0027s0083.1.p	pacid=33021385 transcript=Mapoly0027s0083.1 locus=Mapoly0027s0083 ID=Mapoly0027s0083.1.v3.1 annot-version=v3.1	-29.6904	0.19331	28509.5	269	11	11	3	3	3	5	0.6	2.98107	3	9
c381	c381.a1	c381.a1.a1	Mapoly0114s0030.1.p	pacid=33004087 transcript=Mapoly0114s0030.1 locus=Mapoly0114s0030 ID=Mapoly0114s0030.1.v3.1 annot-version=v3.1	-14.0125	0.11448	32382.4	297	11	11	3	3	3	8	0.375	1.37137	2	5
c381	c381.a1	c381.a1.a2	Mapoly0114s0030.2.p	pacid=33004088 transcript=Mapoly0114s0030.2 locus=Mapoly0114s0030 ID=Mapoly0114s0030.2.v3.1 annot-version=v3.1	-14.0125	0.11644	31797.2	292	11	11	3	3	3	8	0.375	1.37137	2	5
c382	c382.a1	c382.a1.a1	Mapoly0044s0132.1.p	pacid=33012887 transcript=Mapoly0044s0132.1 locus=Mapoly0044s0132 ID=Mapoly0044s0132.1.v3.1 annot-version=v3.1	-18.7638	0.16447	17134.5	152	11	11	3	3	4	8	0.5	2.16228	1	6
c383	c383.a1	c383.a1.a1	Mapoly0083s0026.1.p	pacid=33025431 transcript=Mapoly0083s0026.1 locus=Mapoly0083s0026 ID=Mapoly0083s0026.1.v3.1 annot-version=v3.1	-21.7012	0.10021	51881.9	479	11	11	3	3	4	15	0.266667	0.84785	1	9
c384	c384.a1	c384.a1.a1	Mapoly0214s0012.1.p	pacid=33016391 transcript=Mapoly0214s0012.1 locus=Mapoly0214s0012 ID=Mapoly0214s0012.1.v3.1 annot-version=v3.1	-36.0315	0.11271	46116	417	11	11	3	3	4	12	0.333333	1.15443	1	6
c385	c385.a1	c385.a1.a1	Mapoly0011s0002.1.p	pacid=33018036 transcript=Mapoly0011s0002.1 locus=Mapoly0011s0002 ID=Mapoly0011s0002.1.v3.1 annot-version=v3.1	-18.9097	0.08169	38986.8	355	9	9	3	3	4	7	0.571429	2.72759	2	7
c385	c385.a1	c385.a1.a2	Mapoly0132s0057.1.p	pacid=33008757 transcript=Mapoly0132s0057.1 locus=Mapoly0132s0057 ID=Mapoly0132s0057.1.v3.1 annot-version=v3.1	-18.9097	0.08262	38518.8	351	10	10	3	3	4	9	0.444444	1.78256	2	8
c386	c386.a1	c386.a1.a1	Mapoly0006s0176.1.p	pacid=33007129 transcript=Mapoly0006s0176.1 locus=Mapoly0006s0176 ID=Mapoly0006s0176.1.v3.1 annot-version=v3.1	-12.2275	0.13274	25039.3	226	10	10	3	3	3	13	0.230769	0.701254	1	7
c387	c387.a1	c387.a1.a1	Mapoly0026s0075.1.p	pacid=33024348 transcript=Mapoly0026s0075.1 locus=Mapoly0026s0075 ID=Mapoly0026s0075.1.v3.1 annot-version=v3.1	-32.1065	0.36429	16018.8	140	10	10	3	3	3	6	0.5	2.16228	1	7
c388	c388.a1	c388.a1.a1	Mapoly0076s0087.1.p	pacid=33016343 transcript=Mapoly0076s0087.1 locus=Mapoly0076s0087 ID=Mapoly0076s0087.1.v3.1 annot-version=v3.1	-23.994	0.20673	22414.3	208	10	10	3	3	3	8	0.375	1.37137	1	6
c389	c389.a1	c389.a1.a1	Mapoly0028s0004.1.p	pacid=33018056 transcript=Mapoly0028s0004.1 locus=Mapoly0028s0004 ID=Mapoly0028s0004.1.v3.1 annot-version=v3.1	-27.9416	0.24537	22769	216	9	9	3	3	3	8	0.375	1.37137	8	6
c389	c389.a1	c389.a1.a2	Mapoly0085s0057.1.p	pacid=33005308 transcript=Mapoly0085s0057.1 locus=Mapoly0085s0057 ID=Mapoly0085s0057.1.v3.1 annot-version=v3.1	-27.9416	0.24537	22808.1	216	9	9	3	3	3	8	0.375	1.37137	8	6
c389	c389.a1	c389.a1.a3	Mapoly0085s0059.1.p	pacid=33005252 transcript=Mapoly0085s0059.1 locus=Mapoly0085s0059 ID=Mapoly0085s0059.1.v3.1 annot-version=v3.1	-27.9416	0.24537	22792	216	9	9	3	3	3	8	0.375	1.37137	8	6
c389	c389.a1	c389.a1.a4	Mapoly0210s0002.1.p	pacid=33004880 transcript=Mapoly0210s0002.1 locus=Mapoly0210s0002 ID=Mapoly0210s0002.1.v3.1 annot-version=v3.1	-27.9416	0.24537	22853.1	216	9	9	3	3	3	8	0.375	1.37137	8	6
c389	c389.a1	c389.a1.a5	Mapoly0242s0002.1.p	pacid=33009549 transcript=Mapoly0242s0002.1 locus=Mapoly0242s0002 ID=Mapoly0242s0002.1.v3.1 annot-version=v3.1	-27.9416	0.24537	22853.1	216	9	9	3	3	3	8	0.375	1.37137	8	6
c389	c389.a1	c389.a1.a6	Mapoly0352s0001.1.p	pacid=33025802 transcript=Mapoly0352s0001.1 locus=Mapoly0352s0001 ID=Mapoly0352s0001.1.v3.1 annot-version=v3.1	-27.9416	0.24537	22764.9	216	9	9	3	3	3	8	0.375	1.37137	8	6
c389	c389.a1	c389.a1.a7	Mapoly0352s0002.1.p	pacid=33025800 transcript=Mapoly0352s0002.1 locus=Mapoly0352s0002 ID=Mapoly0352s0002.1.v3.1 annot-version=v3.1	-27.9416	0.24537	22853	216	9	9	3	3	3	8	0.375	1.37137	8	6
c389	c389.a1	c389.a1.a8	Mapoly0352s0003.1.p	pacid=33025803 transcript=Mapoly0352s0003.1 locus=Mapoly0352s0003 ID=Mapoly0352s0003.1.v3.1 annot-version=v3.1	-27.9416	0.24537	22681	216	9	9	3	3	3	8	0.375	1.37137	8	6
c390	c390.a1	c390.a1.a1	Mapoly0105s0050.1.p	pacid=33016156 transcript=Mapoly0105s0050.1 locus=Mapoly0105s0050 ID=Mapoly0105s0050.1.v3.1 annot-version=v3.1	-20.0221	0.04044	105622	989	9	9	3	3	3	31	0.0967742	0.249609	4	6
c390	c390.a1	c390.a1.a2	Mapoly0105s0050.2.p	pacid=33016157 transcript=Mapoly0105s0050.2 locus=Mapoly0105s0050 ID=Mapoly0105s0050.2.v3.1 annot-version=v3.1	-20.0221	0.04044	105622	989	9	9	3	3	3	31	0.0967742	0.249609	4	6
c390	c390.a1	c390.a1.a3	Mapoly0105s0050.3.p	pacid=33016158 transcript=Mapoly0105s0050.3 locus=Mapoly0105s0050 ID=Mapoly0105s0050.3.v3.1 annot-version=v3.1	-20.0221	0.04057	104975	986	9	9	3	3	3	31	0.0967742	0.249609	4	6
c390	c390.a1	c390.a1.a4	Mapoly0105s0050.4.p	pacid=33016159 transcript=Mapoly0105s0050.4 locus=Mapoly0105s0050 ID=Mapoly0105s0050.4.v3.1 annot-version=v3.1	-20.0221	0.04103	103859	975	9	9	3	3	3	31	0.0967742	0.249609	4	6
c391	c391.a1	c391.a1.a1	Mapoly0006s0241.1.p	pacid=33007006 transcript=Mapoly0006s0241.1 locus=Mapoly0006s0241 ID=Mapoly0006s0241.1.v3.1 annot-version=v3.1	-13.2239	0.15207	24603.3	217	9	9	3	3	3	13	0.230769	0.701254	2	6
c391	c391.a1	c391.a1.a2	Mapoly0006s0264.1.p	pacid=33007264 transcript=Mapoly0006s0264.1 locus=Mapoly0006s0264 ID=Mapoly0006s0264.1.v3.1 annot-version=v3.1	-13.2239	0.15207	24603.3	217	9	9	3	3	3	13	0.230769	0.701254	2	6
c392	c392.a1	c392.a1.a1	Mapoly0008s0245.1.p	pacid=33026546 transcript=Mapoly0008s0245.1 locus=Mapoly0008s0245 ID=Mapoly0008s0245.1.v3.1 annot-version=v3.1	-15.2426	0.06158	42558.4	406	9	9	2	2	3	18	0.166667	0.467799	1	5
c393	c393.a1	c393.a1.a1	Mapoly0033s0148.1.p	pacid=33003749 transcript=Mapoly0033s0148.1 locus=Mapoly0033s0148 ID=Mapoly0033s0148.1.v3.1 annot-version=v3.1	-20.9065	0.10826	36015.2	351	9	9	3	3	3	3	1	9	1	7
c394	c394.a1	c394.a1.a1	Mapoly0010s0172.1.p	pacid=33022059 transcript=Mapoly0010s0172.1 locus=Mapoly0010s0172 ID=Mapoly0010s0172.1.v3.1 annot-version=v3.1	-13.7932	0.06608	50313.1	454	8	8	3	3	3	17	0.176471	0.501311	1	6
c395	c395.a1	c395.a1.a1	Mapoly0019s0081.1.p	pacid=33011240 transcript=Mapoly0019s0081.1 locus=Mapoly0019s0081 ID=Mapoly0019s0081.1.v3.1 annot-version=v3.1	-15.2306	0.15837	24934.3	221	8	8	3	3	3	11	0.272727	0.873817	1	6
c396	c396.a1	c396.a1.a1	Mapoly0052s0064.1.p	pacid=33026744 transcript=Mapoly0052s0064.1 locus=Mapoly0052s0064 ID=Mapoly0052s0064.1.v3.1 annot-version=v3.1	-15.543	0.27419	13759.7	124	8	8	3	3	3	5	0.6	2.98107	1	6
c397	c397.a1	c397.a1.a1	Mapoly0076s0059.1.p	pacid=33016312 transcript=Mapoly0076s0059.1 locus=Mapoly0076s0059 ID=Mapoly0076s0059.1.v3.1 annot-version=v3.1	-23.0035	0.20625	17118.5	160	8	8	3	3	3	4	0.75	4.62341	1	3
c398	c398.a1	c398.a1.a1	Mapoly0121s0008.1.p	pacid=33026917 transcript=Mapoly0121s0008.1 locus=Mapoly0121s0008 ID=Mapoly0121s0008.1.v3.1 annot-version=v3.1	-24.4672	0.22703	20044.8	185	8	8	3	3	3	7	0.428571	1.6827	1	3
c399	c399.a1	c399.a1.a1	Mapoly0003s0166.1.p	pacid=33009854 transcript=Mapoly0003s0166.1 locus=Mapoly0003s0166 ID=Mapoly0003s0166.1.v3.1 annot-version=v3.1	-10.115	0.12083	26542.1	240	7	7	3	3	3	11	0.272727	0.873817	3	4
c399	c399.a1	c399.a1.a2	Mapoly0003s0166.2.p	pacid=33009855 transcript=Mapoly0003s0166.2 locus=Mapoly0003s0166 ID=Mapoly0003s0166.2.v3.1 annot-version=v3.1	-10.115	0.12083	26542.1	240	7	7	3	3	3	11	0.272727	0.873817	3	4
c399	c399.a1	c399.a1.a3	Mapoly0003s0166.3.p	pacid=33009856 transcript=Mapoly0003s0166.3 locus=Mapoly0003s0166 ID=Mapoly0003s0166.3.v3.1 annot-version=v3.1	-10.115	0.125	25715.7	232	7	7	3	3	3	12	0.25	0.778279	3	4
c400	c400.a1	c400.a1.a1	Mapoly0026s0084.1.p	pacid=33024403 transcript=Mapoly0026s0084.1 locus=Mapoly0026s0084 ID=Mapoly0026s0084.1.v3.1 annot-version=v3.1	-17.3744	0.11821	32507.9	313	7	7	3	3	3	12	0.25	0.778279	2	4
c400	c400.a1	c400.a1.a2	Mapoly0026s0084.2.p	pacid=33024404 transcript=Mapoly0026s0084.2 locus=Mapoly0026s0084 ID=Mapoly0026s0084.2.v3.1 annot-version=v3.1	-17.3744	0.14859	27019.2	249	7	7	3	3	3	12	0.25	0.778279	2	4
c401	c401.a1	c401.a1.a1	Mapoly0043s0135.1.p	pacid=33021234 transcript=Mapoly0043s0135.1 locus=Mapoly0043s0135 ID=Mapoly0043s0135.1.v3.1 annot-version=v3.1	-16.7696	0.1634	17540.5	153	7	7	2	2	3	7	0.428571	1.6827	2	4
c401	c401.a1	c401.a1.a2	Mapoly0124s0041.1.p	pacid=33012668 transcript=Mapoly0124s0041.1 locus=Mapoly0124s0041 ID=Mapoly0124s0041.1.v3.1 annot-version=v3.1	-16.7696	0.1634	17540.5	153	7	7	2	2	3	7	0.428571	1.6827	2	4
c402	c402.a1	c402.a1.a1	Mapoly0012s0133.1.p	pacid=33017586 transcript=Mapoly0012s0133.1 locus=Mapoly0012s0133 ID=Mapoly0012s0133.1.v3.1 annot-version=v3.1	-21.909	0.1254	33460.6	311	7	7	3	3	3	16	0.1875	0.539927	1	4
c403	c403.a1	c403.a1.a1	Mapoly0026s0053.1.p	pacid=33024439 transcript=Mapoly0026s0053.1 locus=Mapoly0026s0053 ID=Mapoly0026s0053.1.v3.1 annot-version=v3.1	-23.6064	0.19617	22309.5	209	7	7	3	3	3	8	0.375	1.37137	1	4
c404	c404.a1	c404.a1.a1	Mapoly0035s0014.1.p	pacid=33026260 transcript=Mapoly0035s0014.1 locus=Mapoly0035s0014 ID=Mapoly0035s0014.1.v3.1 annot-version=v3.1	-22.2063	0.10162	45724.3	433	7	7	3	3	3	20	0.15	0.412538	1	5
c405	c405.a1	c405.a1.a1	Mapoly0059s0076.1.p	pacid=33006566 transcript=Mapoly0059s0076.1 locus=Mapoly0059s0076 ID=Mapoly0059s0076.1.v3.1 annot-version=v3.1	-14.9332	0.04277	84126.3	795	7	7	3	3	3	21	0.142857	0.389495	1	5
c406	c406.a1	c406.a1.a1	Mapoly0072s0097.1.p	pacid=33008603 transcript=Mapoly0072s0097.1 locus=Mapoly0072s0097 ID=Mapoly0072s0097.1.v3.1 annot-version=v3.1	-23.6564	0.13208	35912.3	318	7	7	3	3	3	6	0.5	2.16228	1	3
c407	c407.a1	c407.a1.a1	Mapoly0057s0073.1.p	pacid=33011757 transcript=Mapoly0057s0073.1 locus=Mapoly0057s0073 ID=Mapoly0057s0073.1.v3.1 annot-version=v3.1	-13.1013	0.06767	27937.9	266	6	5	3	2	3	6	0.5	2.16228	12	2
c407	c407.a1	c407.a1.a2	Mapoly0057s0082.1.p	pacid=33011706 transcript=Mapoly0057s0082.1 locus=Mapoly0057s0082 ID=Mapoly0057s0082.1.v3.1 annot-version=v3.1	-13.1013	0.06767	28011	266	6	5	3	2	3	6	0.5	2.16228	12	2
c407	c407.a1	c407.a1.a3	Mapoly0057s0083.1.p	pacid=33011835 transcript=Mapoly0057s0083.1 locus=Mapoly0057s0083 ID=Mapoly0057s0083.1.v3.1 annot-version=v3.1	-13.1013	0.06767	28126	266	6	5	3	2	3	6	0.5	2.16228	12	2
c407	c407.a1	c407.a1.a4	Mapoly0068s0071.1.p	pacid=33024861 transcript=Mapoly0068s0071.1 locus=Mapoly0068s0071 ID=Mapoly0068s0071.1.v3.1 annot-version=v3.1	-13.1013	0.06767	28001.1	266	6	5	3	2	3	6	0.5	2.16228	12	2
c407	c407.a1	c407.a1.a5	Mapoly0199s0013.1.p	pacid=33021334 transcript=Mapoly0199s0013.1 locus=Mapoly0199s0013 ID=Mapoly0199s0013.1.v3.1 annot-version=v3.1	-13.1013	0.06767	28106.1	266	6	5	3	2	3	6	0.5	2.16228	12	2
c407	c407.a1	c407.a1.a6	Mapoly0199s0014.1.p	pacid=33021341 transcript=Mapoly0199s0014.1 locus=Mapoly0199s0014 ID=Mapoly0199s0014.1.v3.1 annot-version=v3.1	-13.1013	0.06767	28040.9	266	6	5	3	2	3	6	0.5	2.16228	12	2
c407	c407.a1	c407.a1.a7	Mapoly0199s0015.1.p	pacid=33021345 transcript=Mapoly0199s0015.1 locus=Mapoly0199s0015 ID=Mapoly0199s0015.1.v3.1 annot-version=v3.1	-13.1013	0.06767	27967.9	266	6	5	3	2	3	6	0.5	2.16228	12	2
c407	c407.a1	c407.a1.a8	Mapoly0199s0016.1.p	pacid=33021351 transcript=Mapoly0199s0016.1 locus=Mapoly0199s0016 ID=Mapoly0199s0016.1.v3.1 annot-version=v3.1	-13.1013	0.06767	28005	266	6	5	3	2	3	6	0.5	2.16228	12	2
c407	c407.a1	c407.a1.a9	Mapoly0199s0017.1.p	pacid=33021342 transcript=Mapoly0199s0017.1 locus=Mapoly0199s0017 ID=Mapoly0199s0017.1.v3.1 annot-version=v3.1	-13.1013	0.06818	27662.7	264	6	5	3	2	3	6	0.5	2.16228	12	2
c407	c407.a1	c407.a1.b10	Mapoly0199s0018.1.p	pacid=33021340 transcript=Mapoly0199s0018.1 locus=Mapoly0199s0018 ID=Mapoly0199s0018.1.v3.1 annot-version=v3.1	-13.1013	0.06818	27847.9	264	6	5	3	2	3	6	0.5	2.16228	12	2
c407	c407.a1	c407.a1.b11	Mapoly0199s0019.1.p	pacid=33021335 transcript=Mapoly0199s0019.1 locus=Mapoly0199s0019 ID=Mapoly0199s0019.1.v3.1 annot-version=v3.1	-13.1013	0.06818	27803.8	264	6	5	3	2	3	6	0.5	2.16228	12	2
c407	c407.a1	c407.a1.b12	Mapoly0371s0001.1.p	pacid=33013404 transcript=Mapoly0371s0001.1 locus=Mapoly0371s0001 ID=Mapoly0371s0001.1.v3.1 annot-version=v3.1	-13.1013	0.06742	28005.9	267	6	5	3	2	3	5	0.6	2.98107	12	2
c407	c407.a2	c407.a2.a1	Mapoly0199s0012.1.p	pacid=33021346 transcript=Mapoly0199s0012.1 locus=Mapoly0199s0012 ID=Mapoly0199s0012.1.v3.1 annot-version=v3.1	-5.74473	0.06767	27965	266	2	1	2	1	2	6	0.333333	1.15443	2	1
c407	c407.a2	c407.a2.a2	Mapoly0199s0020.1.p	pacid=33021350 transcript=Mapoly0199s0020.1 locus=Mapoly0199s0020 ID=Mapoly0199s0020.1.v3.1 annot-version=v3.1	-5.74473	0.06818	27646.8	264	3	1	2	1	2	6	0.333333	1.15443	2	2
c408	c408.a1	c408.a1.a1	Mapoly0032s0061.1.p	pacid=33011514 transcript=Mapoly0032s0061.1 locus=Mapoly0032s0061 ID=Mapoly0032s0061.1.v3.1 annot-version=v3.1	-20.7623	0.12577	34372.5	326	6	6	3	3	3	15	0.2	0.584893	7	3
c408	c408.a1	c408.a1.a2	Mapoly0032s0070.1.p	pacid=33011554 transcript=Mapoly0032s0070.1 locus=Mapoly0032s0070 ID=Mapoly0032s0070.1.v3.1 annot-version=v3.1	-20.7623	0.125	34603.7	328	6	6	3	3	3	16	0.1875	0.539927	7	3
c408	c408.a1	c408.a1.a3	Mapoly0032s0070.2.p	pacid=33011555 transcript=Mapoly0032s0070.2 locus=Mapoly0032s0070 ID=Mapoly0032s0070.2.v3.1 annot-version=v3.1	-20.7623	0.12577	34424.6	326	6	6	3	3	3	16	0.1875	0.539927	7	3
c408	c408.a1	c408.a1.a4	Mapoly0032s0071.1.p	pacid=33011624 transcript=Mapoly0032s0071.1 locus=Mapoly0032s0071 ID=Mapoly0032s0071.1.v3.1 annot-version=v3.1	-20.7623	0.14964	29053.9	274	6	6	3	3	3	17	0.176471	0.501311	7	3
c408	c408.a1	c408.a1.a5	Mapoly0032s0072.1.p	pacid=33011544 transcript=Mapoly0032s0072.1 locus=Mapoly0032s0072 ID=Mapoly0032s0072.1.v3.1 annot-version=v3.1	-20.7623	0.125	34546.7	328	6	6	3	3	3	16	0.1875	0.539927	7	3
c408	c408.a1	c408.a1.a6	Mapoly0032s0072.2.p	pacid=33011545 transcript=Mapoly0032s0072.2 locus=Mapoly0032s0072 ID=Mapoly0032s0072.2.v3.1 annot-version=v3.1	-20.7623	0.125	34546.7	328	6	6	3	3	3	16	0.1875	0.539927	7	3
c408	c408.a1	c408.a1.a7	Mapoly0032s0073.1.p	pacid=33011621 transcript=Mapoly0032s0073.1 locus=Mapoly0032s0073 ID=Mapoly0032s0073.1.v3.1 annot-version=v3.1	-20.7623	0.12577	34372.6	326	6	6	3	3	3	16	0.1875	0.539927	7	3
c409	c409.a1	c409.a1.a1	Mapoly0010s0047.1.p	pacid=33022093 transcript=Mapoly0010s0047.1 locus=Mapoly0010s0047 ID=Mapoly0010s0047.1.v3.1 annot-version=v3.1	-19.5417	0.0638	69227	627	6	6	3	3	3	26	0.115385	0.304321	1	3
c410	c410.a1	c410.a1.a1	Mapoly0014s0093.1.p	pacid=33015279 transcript=Mapoly0014s0093.1 locus=Mapoly0014s0093 ID=Mapoly0014s0093.1.v3.1 annot-version=v3.1	-14.7747	0.03183	110899	974	6	6	3	3	3	54	0.0555556	0.136464	1	3
c411	c411.a1	c411.a1.a1	Mapoly0042s0009.1.p	pacid=33016574 transcript=Mapoly0042s0009.1 locus=Mapoly0042s0009 ID=Mapoly0042s0009.1.v3.1 annot-version=v3.1	-20.6084	0.12211	32532.3	303	6	6	3	3	3	10	0.3	0.995262	1	3
c412	c412.a1	c412.a1.a1	Mapoly0057s0026.1.p	pacid=33011836 transcript=Mapoly0057s0026.1 locus=Mapoly0057s0026 ID=Mapoly0057s0026.1.v3.1 annot-version=v3.1	-22.5409	0.24848	17307.1	165	6	6	3	3	3	10	0.3	0.995262	1	4
c413	c413.a1	c413.a1.a1	Mapoly0078s0013.1.p	pacid=33010784 transcript=Mapoly0078s0013.1 locus=Mapoly0078s0013 ID=Mapoly0078s0013.1.v3.1 annot-version=v3.1	-15.4515	0.26531	16172.7	147	6	6	3	3	4	8	0.5	2.16228	1	3
c414	c414.a1	c414.a1.a1	Mapoly0081s0050.1.p	pacid=33018944 transcript=Mapoly0081s0050.1 locus=Mapoly0081s0050 ID=Mapoly0081s0050.1.v3.1 annot-version=v3.1	-14.0011	0.06711	47929.4	447	6	6	3	3	3	20	0.15	0.412538	1	4
c415	c415.a1	c415.a1.a1	Mapoly0082s0046.1.p	pacid=33004662 transcript=Mapoly0082s0046.1 locus=Mapoly0082s0046 ID=Mapoly0082s0046.1.v3.1 annot-version=v3.1	-23.6503	0.13636	33225.9	308	6	6	3	3	3	13	0.230769	0.701254	1	4
c416	c416.a1	c416.a1.a1	Mapoly0089s0029.1.p	pacid=33014505 transcript=Mapoly0089s0029.1 locus=Mapoly0089s0029 ID=Mapoly0089s0029.1.v3.1 annot-version=v3.1	-15.2813	0.14516	26903.2	248	6	6	3	3	3	8	0.375	1.37137	1	5
c417	c417.a1	c417.a1.a1	Mapoly0098s0030.1.p	pacid=33021048 transcript=Mapoly0098s0030.1 locus=Mapoly0098s0030 ID=Mapoly0098s0030.1.v3.1 annot-version=v3.1	-20.1675	0.11613	35036.9	310	6	6	3	3	3	13	0.230769	0.701254	1	3
c418	c418.a1	c418.a1.a1	Mapoly0108s0028.1.p	pacid=33021782 transcript=Mapoly0108s0028.1 locus=Mapoly0108s0028 ID=Mapoly0108s0028.1.v3.1 annot-version=v3.1	-24.0547	0.05472	84042.6	731	6	6	3	3	3	24	0.125	0.333521	1	3
c419	c419.a1	c419.a1.a1	Mapoly0111s0004.1.p	pacid=33009499 transcript=Mapoly0111s0004.1 locus=Mapoly0111s0004 ID=Mapoly0111s0004.1.v3.1 annot-version=v3.1	-13.8456	0.06163	53126	503	6	6	3	3	4	27	0.148148	0.406527	1	2
c420	c420.a1	c420.a1.a1	Mapoly0157s0004.1.p	pacid=33003617 transcript=Mapoly0157s0004.1 locus=Mapoly0157s0004 ID=Mapoly0157s0004.1.v3.1 annot-version=v3.1	-12.9576	0.12554	26420.9	231	6	3	3	1	3	15	0.2	0.584893	1	3
c420	c420.a2	c420.a2.a1	Mapoly0045s0035.1.p	pacid=33015062 transcript=Mapoly0045s0035.1 locus=Mapoly0045s0035 ID=Mapoly0045s0035.1.v3.1 annot-version=v3.1	-13.2129	0.11739	25833.3	230	4	1	3	1	3	11	0.272727	0.873817	1	3
c421	c421.a1	c421.a1.a1	Mapoly0180s0004.1.p	pacid=33006304 transcript=Mapoly0180s0004.1 locus=Mapoly0180s0004 ID=Mapoly0180s0004.1.v3.1 annot-version=v3.1	-18.6911	0.08168	45638.4	404	6	6	3	3	3	21	0.142857	0.389495	1	3
c422	c422.a1	c422.a1.a1	Mapoly0141s0017.1.p	pacid=33009620 transcript=Mapoly0141s0017.1 locus=Mapoly0141s0017 ID=Mapoly0141s0017.1.v3.1 annot-version=v3.1	-23.9724	0.20465	24038.1	215	5	5	3	3	3	10	0.3	0.995262	2	3
c422	c422.a1	c422.a1.a2	Mapoly0141s0017.2.p	pacid=33009621 transcript=Mapoly0141s0017.2 locus=Mapoly0141s0017 ID=Mapoly0141s0017.2.v3.1 annot-version=v3.1	-23.9724	0.20561	24024.2	214	5	5	3	3	3	10	0.3	0.995262	2	3
c423	c423.a1	c423.a1.a1	Mapoly0184s0026.1.p	pacid=33013383 transcript=Mapoly0184s0026.1 locus=Mapoly0184s0026 ID=Mapoly0184s0026.1.v3.1 annot-version=v3.1	-13.5268	0.19212	22882.3	203	5	5	3	3	3	9	0.333333	1.15443	2	4
c423	c423.a1	c423.a1.a2	Mapoly0184s0026.2.p	pacid=33013384 transcript=Mapoly0184s0026.2 locus=Mapoly0184s0026 ID=Mapoly0184s0026.2.v3.1 annot-version=v3.1	-13.5268	0.19212	22882.3	203	5	5	3	3	3	9	0.333333	1.15443	2	4
c424	c424.a1	c424.a1.a1	Mapoly0001s0334.1.p	pacid=33020287 transcript=Mapoly0001s0334.1 locus=Mapoly0001s0334 ID=Mapoly0001s0334.1.v3.1 annot-version=v3.1	-7.85397	0.11111	30962.2	288	5	5	3	3	3	16	0.1875	0.539927	1	3
c425	c425.a1	c425.a1.a1	Mapoly0029s0102.1.p	pacid=33014746 transcript=Mapoly0029s0102.1 locus=Mapoly0029s0102 ID=Mapoly0029s0102.1.v3.1 annot-version=v3.1	-30.5864	0.0743	54433.6	498	5	5	3	3	3	18	0.166667	0.467799	1	3
c426	c426.a1	c426.a1.a1	Mapoly0033s0125.1.p	pacid=33003815 transcript=Mapoly0033s0125.1 locus=Mapoly0033s0125 ID=Mapoly0033s0125.1.v3.1 annot-version=v3.1	-7.26761	0.02762	80429.5	724	5	5	2	2	3	29	0.103448	0.268961	1	3
c427	c427.a1	c427.a1.a1	Mapoly0044s0032.2.p	pacid=33013061 transcript=Mapoly0044s0032.2 locus=Mapoly0044s0032 ID=Mapoly0044s0032.2.v3.1 annot-version=v3.1	-24.6161	0.11083	42398.8	397	5	5	3	3	3	17	0.176471	0.501311	1	3
c428	c428.a1	c428.a1.a1	Mapoly0050s0013.1.p	pacid=33006106 transcript=Mapoly0050s0013.1 locus=Mapoly0050s0013 ID=Mapoly0050s0013.1.v3.1 annot-version=v3.1	-20.6142	0.09398	43030.6	415	5	5	3	3	3	16	0.1875	0.539927	1	4
c429	c429.a1	c429.a1.a1	Mapoly0096s0018.1.p	pacid=33018757 transcript=Mapoly0096s0018.1 locus=Mapoly0096s0018 ID=Mapoly0096s0018.1.v3.1 annot-version=v3.1	-16.0904	0.07595	51961.2	474	5	5	3	3	3	18	0.166667	0.467799	1	2
c430	c430.a1	c430.a1.a1	Mapoly0099s0045.1.p	pacid=33025040 transcript=Mapoly0099s0045.1 locus=Mapoly0099s0045 ID=Mapoly0099s0045.1.v3.1 annot-version=v3.1	-17.786	0.1084	38942.6	369	5	5	3	3	3	12	0.25	0.778279	1	2
c431	c431.a1	c431.a1.a1	Mapoly0120s0007.1.p	pacid=33019644 transcript=Mapoly0120s0007.1 locus=Mapoly0120s0007 ID=Mapoly0120s0007.1.v3.1 annot-version=v3.1	-15.968	0.0451	85212.7	776	5	5	3	3	3	24	0.125	0.333521	1	3
c432	c432.a1	c432.a1.a1	Mapoly0062s0005.1.p	pacid=33016792 transcript=Mapoly0062s0005.1 locus=Mapoly0062s0005 ID=Mapoly0062s0005.1.v3.1 annot-version=v3.1	-16.8389	0.18286	18670.6	175	4	4	3	3	3	10	0.3	0.995262	2	3
c432	c432.a1	c432.a1.a2	Mapoly0062s0005.2.p	pacid=33016793 transcript=Mapoly0062s0005.2 locus=Mapoly0062s0005 ID=Mapoly0062s0005.2.v3.1 annot-version=v3.1	-16.8389	0.18286	18670.6	175	4	4	3	3	3	10	0.3	0.995262	2	3
c433	c433.a1	c433.a1.a1	Mapoly0002s0312.1.p	pacid=33023481 transcript=Mapoly0002s0312.1 locus=Mapoly0002s0312 ID=Mapoly0002s0312.1.v3.1 annot-version=v3.1	-15.2562	0.079	50557.5	481	4	4	3	3	3	15	0.2	0.584893	1	2
c434	c434.a1	c434.a1.a1	Mapoly0005s0275.1.p	pacid=33003480 transcript=Mapoly0005s0275.1 locus=Mapoly0005s0275 ID=Mapoly0005s0275.1.v3.1 annot-version=v3.1	-20.8996	0.13245	31687.8	302	4	4	3	3	3	14	0.214286	0.637894	1	3
c435	c435.a1	c435.a1.a1	Mapoly0007s0166.1.p	pacid=33022390 transcript=Mapoly0007s0166.1 locus=Mapoly0007s0166 ID=Mapoly0007s0166.1.v3.1 annot-version=v3.1	-16.9189	0.16372	23621.7	226	4	4	3	3	3	10	0.3	0.995262	1	3
c436	c436.a1	c436.a1.a1	Mapoly0020s0034.1.p	pacid=33004379 transcript=Mapoly0020s0034.1 locus=Mapoly0020s0034 ID=Mapoly0020s0034.1.v3.1 annot-version=v3.1	-11.8712	0.07036	51194.5	469	4	4	3	3	3	19	0.157895	0.43845	1	2
c437	c437.a1	c437.a1.a1	Mapoly0033s0108.1.p	pacid=33003786 transcript=Mapoly0033s0108.1 locus=Mapoly0033s0108 ID=Mapoly0033s0108.1.v3.1 annot-version=v3.1	-12.6955	0.06334	56652.8	521	4	4	3	3	3	25	0.12	0.318257	1	2
c438	c438.a1	c438.a1.a1	Mapoly0035s0120.1.p	pacid=33026238 transcript=Mapoly0035s0120.1 locus=Mapoly0035s0120 ID=Mapoly0035s0120.1.v3.1 annot-version=v3.1	-18.2027	0.06619	60834	559	4	4	3	3	3	18	0.166667	0.467799	1	2
c439	c439.a1	c439.a1.a1	Mapoly0065s0015.1.p	pacid=33004547 transcript=Mapoly0065s0015.1 locus=Mapoly0065s0015 ID=Mapoly0065s0015.1.v3.1 annot-version=v3.1	-21.4941	0.04012	105597	972	4	4	3	3	3	53	0.0566038	0.13921	1	3
c440	c440.a1	c440.a1.a1	Mapoly0083s0076.1.p	pacid=33025323 transcript=Mapoly0083s0076.1 locus=Mapoly0083s0076 ID=Mapoly0083s0076.1.v3.1 annot-version=v3.1	-13.1747	0.07214	44120.1	402	4	4	3	3	3	20	0.15	0.412538	1	2
c441	c441.a1	c441.a1.a1	Mapoly0096s0051.1.p	pacid=33018730 transcript=Mapoly0096s0051.1 locus=Mapoly0096s0051 ID=Mapoly0096s0051.1.v3.1 annot-version=v3.1	-23.9851	0.0432	106672	949	4	4	3	3	3	47	0.0638298	0.158323	1	2
c442	c442.a1	c442.a1.a1	Mapoly0107s0040.1.p	pacid=33020947 transcript=Mapoly0107s0040.1 locus=Mapoly0107s0040 ID=Mapoly0107s0040.1.v3.1 annot-version=v3.1	-15.4323	0.05902	66302.3	593	4	4	3	3	3	23	0.130435	0.350314	1	2
c443	c443.a1	c443.a1.a1	Mapoly0117s0051.1.p	pacid=33027540 transcript=Mapoly0117s0051.1 locus=Mapoly0117s0051 ID=Mapoly0117s0051.1.v3.1 annot-version=v3.1	-21.9724	0.20084	25653	239	4	4	3	3	3	6	0.5	2.16228	1	2
c444	c444.a1	c444.a1.a1	Mapoly0127s0051.1.p	pacid=33009147 transcript=Mapoly0127s0051.1 locus=Mapoly0127s0051 ID=Mapoly0127s0051.1.v3.1 annot-version=v3.1	-14.4073	0.05324	76857.9	695	4	4	3	3	3	27	0.111111	0.29155	1	2
c445	c445.a1	c445.a1.a1	Mapoly0159s0027.1.p	pacid=33019073 transcript=Mapoly0159s0027.1 locus=Mapoly0159s0027 ID=Mapoly0159s0027.1.v3.1 annot-version=v3.1	-18.0757	0.17277	20200.6	191	4	4	3	3	3	6	0.5	2.16228	1	3
c446	c446.a1	c446.a1.a1	Mapoly0176s0016.1.p	pacid=33011877 transcript=Mapoly0176s0016.1 locus=Mapoly0176s0016 ID=Mapoly0176s0016.1.v3.1 annot-version=v3.1	-25.6771	0.0802	63513.8	586	4	4	3	3	3	19	0.157895	0.43845	1	3
c447	c447.a1	c447.a1.a1	Mapoly0010s0049.1.p	pacid=33022062 transcript=Mapoly0010s0049.1 locus=Mapoly0010s0049 ID=Mapoly0010s0049.1.v3.1 annot-version=v3.1	-12.3857	0.0874	53463.4	492	3	3	3	3	3	21	0.142857	0.389495	2	2
c447	c447.a1	c447.a1.a2	Mapoly0010s0049.2.p	pacid=33022063 transcript=Mapoly0010s0049.2 locus=Mapoly0010s0049 ID=Mapoly0010s0049.2.v3.1 annot-version=v3.1	-12.3857	0.0874	53463.4	492	3	3	3	3	3	21	0.142857	0.389495	2	2
c448	c448.a1	c448.a1.a1	Mapoly0008s0139.1.p	pacid=33026475 transcript=Mapoly0008s0139.1 locus=Mapoly0008s0139 ID=Mapoly0008s0139.1.v3.1 annot-version=v3.1	-10.598	0.07933	46677.1	416	3	3	3	3	3	18	0.166667	0.467799	1	2
c449	c449.a1	c449.a1.a1	Mapoly0008s0188.1.p	pacid=33026531 transcript=Mapoly0008s0188.1 locus=Mapoly0008s0188 ID=Mapoly0008s0188.1.v3.1 annot-version=v3.1	-22.3688	0.05195	58843.1	539	3	3	2	2	3	24	0.125	0.333521	1	1
c450	c450.a1	c450.a1.a1	Mapoly0013s0124.1.p	pacid=33012252 transcript=Mapoly0013s0124.1 locus=Mapoly0013s0124 ID=Mapoly0013s0124.1.v3.1 annot-version=v3.1	-12.2433	0.03782	108499	952	3	3	3	3	3	33	0.0909091	0.232847	1	1
c451	c451.a1	c451.a1.a1	Mapoly0015s0089.1.p	pacid=33019527 transcript=Mapoly0015s0089.1 locus=Mapoly0015s0089 ID=Mapoly0015s0089.1.v3.1 annot-version=v3.1	-15.8302	0.05455	69172.5	660	3	3	3	3	3	26	0.115385	0.304321	1	2
c452	c452.a1	c452.a1.a1	Mapoly0023s0008.1.p	pacid=33014203 transcript=Mapoly0023s0008.1 locus=Mapoly0023s0008 ID=Mapoly0023s0008.1.v3.1 annot-version=v3.1	-17.4331	0.08557	46558.5	409	3	3	3	3	3	18	0.166667	0.467799	1	1
c453	c453.a1	c453.a1.a1	Mapoly0031s0082.1.p	pacid=33022672 transcript=Mapoly0031s0082.1 locus=Mapoly0031s0082 ID=Mapoly0031s0082.1.v3.1 annot-version=v3.1	-11.9683	0.03216	107463	995	3	3	3	3	3	45	0.0666667	0.165914	1	2
c454	c454.a1	c454.a1.a1	Mapoly0122s0057.1.p	pacid=33014862 transcript=Mapoly0122s0057.1 locus=Mapoly0122s0057 ID=Mapoly0122s0057.1.v3.1 annot-version=v3.1	-12.6111	0.04202	95082.7	833	3	3	3	3	3	35	0.0857143	0.218188	1	1
c455	c455.a1	c455.a1.a1	Mapoly0151s0030.1.p	pacid=33008084 transcript=Mapoly0151s0030.1 locus=Mapoly0151s0030 ID=Mapoly0151s0030.1.v3.1 annot-version=v3.1	-18.7397	0.09873	42756.2	395	3	3	3	3	3	18	0.166667	0.467799	1	1
c456	c456.a1	c456.a1.a1	Mapoly0170s0032.1.p	pacid=33016226 transcript=Mapoly0170s0032.1 locus=Mapoly0170s0032 ID=Mapoly0170s0032.1.v3.1 annot-version=v3.1	-14.4246	0.17757	23276.6	214	3	3	3	3	3	14	0.214286	0.637894	1	1
c457	c457.a1	c457.a1.a1	Mapoly0068s0069.1.p	pacid=33024887 transcript=Mapoly0068s0069.1 locus=Mapoly0068s0069 ID=Mapoly0068s0069.1.v3.1 annot-version=v3.1	-14.0665	0.03503	69661.7	628	22	22	2	2	3	22	0.136364	0.368875	1	9
c458	c458.a1	c458.a1.a1	Mapoly0015s0104.1.p	pacid=33019372 transcript=Mapoly0015s0104.1 locus=Mapoly0015s0104 ID=Mapoly0015s0104.1.v3.1 annot-version=v3.1	-15.0915	0.07516	32446.7	306	17	17	2	2	2	12	0.166667	0.467799	1	9
c459	c459.a1	c459.a1.a1	Mapoly0024s0057.1.p	pacid=33023018 transcript=Mapoly0024s0057.1 locus=Mapoly0024s0057 ID=Mapoly0024s0057.1.v3.1 annot-version=v3.1	-17.4665	0.04456	61806.4	561	15	15	2	2	2	17	0.117647	0.311134	1	8
c460	c460.a1	c460.a1.a1	Mapoly0035s0080.1.p	pacid=33026130 transcript=Mapoly0035s0080.1 locus=Mapoly0035s0080 ID=Mapoly0035s0080.1.v3.1 annot-version=v3.1	-11.7809	0.04615	42482	390	15	15	2	2	3	12	0.25	0.778279	1	9
c461	c461.a1	c461.a1.a1	Mapoly0015s0153.1.p	pacid=33019337 transcript=Mapoly0015s0153.1 locus=Mapoly0015s0153 ID=Mapoly0015s0153.1.v3.1 annot-version=v3.1	-10.8554	0.08392	15610.6	143	13	13	2	2	3	5	0.6	2.98107	1	7
c462	c462.a1	c462.a1.a1	Mapoly0073s0091.1.p	pacid=33005699 transcript=Mapoly0073s0091.1 locus=Mapoly0073s0091 ID=Mapoly0073s0091.1.v3.1 annot-version=v3.1	-16.6064	0.09322	24803.4	236	12	12	2	2	3	5	0.6	2.98107	1	8
c463	c463.a1	c463.a1.a1	Mapoly0013s0069.1.p	pacid=33012298 transcript=Mapoly0013s0069.1 locus=Mapoly0013s0069 ID=Mapoly0013s0069.1.v3.1 annot-version=v3.1	-10.9038	0.03254	74559.1	676	11	11	2	2	2	22	0.0909091	0.232847	2	8
c463	c463.a1	c463.a1.a2	Mapoly0013s0069.2.p	pacid=33012299 transcript=Mapoly0013s0069.2 locus=Mapoly0013s0069 ID=Mapoly0013s0069.2.v3.1 annot-version=v3.1	-10.9038	0.03448	69866.6	638	11	11	2	2	2	20	0.1	0.258925	2	8
c464	c464.a1	c464.a1.a1	Mapoly0043s0091.1.p	pacid=33021216 transcript=Mapoly0043s0091.1 locus=Mapoly0043s0091 ID=Mapoly0043s0091.1.v3.1 annot-version=v3.1	-14.5058	0.06757	39094.1	370	11	11	2	2	2	10	0.2	0.584893	2	6
c464	c464.a1	c464.a1.a2	Mapoly0043s0091.2.p	pacid=33021217 transcript=Mapoly0043s0091.2 locus=Mapoly0043s0091 ID=Mapoly0043s0091.2.v3.1 annot-version=v3.1	-14.5058	0.06757	39094.1	370	11	11	2	2	2	10	0.2	0.584893	2	6
c465	c465.a1	c465.a1.a1	Mapoly0055s0009.1.p	pacid=33010632 transcript=Mapoly0055s0009.1 locus=Mapoly0055s0009 ID=Mapoly0055s0009.1.v3.1 annot-version=v3.1	-9.42597	0.14634	18381.3	164	11	11	2	2	2	6	0.333333	1.15443	2	6
c465	c465.a1	c465.a1.a2	Mapoly0084s0003.1.p	pacid=33025695 transcript=Mapoly0084s0003.1 locus=Mapoly0084s0003 ID=Mapoly0084s0003.1.v3.1 annot-version=v3.1	-9.42597	0.14634	18419.2	164	11	11	2	2	2	6	0.333333	1.15443	2	6
c466	c466.a1	c466.a1.a1	Mapoly0044s0054.1.p	pacid=33012941 transcript=Mapoly0044s0054.1 locus=Mapoly0044s0054 ID=Mapoly0044s0054.1.v3.1 annot-version=v3.1	-13.8539	0.15068	16476.2	146	11	11	2	2	3	6	0.5	2.16228	1	5
c467	c467.a1	c467.a1.a1	Mapoly0086s0038.1.p	pacid=33024008 transcript=Mapoly0086s0038.1 locus=Mapoly0086s0038 ID=Mapoly0086s0038.1.v3.1 annot-version=v3.1	-15.1701	0.25806	10318.5	93	10	10	2	2	2	4	0.5	2.16228	2	6
c467	c467.a1	c467.a1.a2	Mapoly0095s0001.1.p	pacid=33008894 transcript=Mapoly0095s0001.1 locus=Mapoly0095s0001 ID=Mapoly0095s0001.1.v3.1 annot-version=v3.1	-15.1701	0.25806	10318.5	93	10	10	2	2	2	4	0.5	2.16228	2	6
c468	c468.a1	c468.a1.a1	Mapoly0008s0175.1.p	pacid=33026487 transcript=Mapoly0008s0175.1 locus=Mapoly0008s0175 ID=Mapoly0008s0175.1.v3.1 annot-version=v3.1	-9.77392	0.09005	23166.1	211	10	10	2	2	2	9	0.222222	0.668101	1	8
c469	c469.a1	c469.a1.a1	Mapoly0135s0043.1.p	pacid=33005220 transcript=Mapoly0135s0043.1 locus=Mapoly0135s0043 ID=Mapoly0135s0043.1.v3.1 annot-version=v3.1	-21.5317	0.20112	18860.5	179	10	10	2	2	2	6	0.333333	1.15443	1	7
c470	c470.a1	c470.a1.a1	Mapoly0011s0183.1.p	pacid=33017898 transcript=Mapoly0011s0183.1 locus=Mapoly0011s0183 ID=Mapoly0011s0183.1.v3.1 annot-version=v3.1	-23.9208	0.15	22558.1	200	9	9	2	2	3	7	0.428571	1.6827	1	3
c471	c471.a1	c471.a1.a1	Mapoly0021s0037.1.p	pacid=33007747 transcript=Mapoly0021s0037.1 locus=Mapoly0021s0037 ID=Mapoly0021s0037.1.v3.1 annot-version=v3.1	-7.96178	0.05736	46243.8	401	9	9	2	2	2	13	0.153846	0.425103	1	7
c472	c472.a1	c472.a1.a1	Mapoly0023s0104.1.p	pacid=33014143 transcript=Mapoly0023s0104.1 locus=Mapoly0023s0104 ID=Mapoly0023s0104.1.v3.1 annot-version=v3.1	-12.5686	0.12575	17726.1	167	9	9	2	2	2	6	0.333333	1.15443	1	7
c473	c473.a1	c473.a1.a1	Mapoly0040s0124.1.p	pacid=33020741 transcript=Mapoly0040s0124.1 locus=Mapoly0040s0124 ID=Mapoly0040s0124.1.v3.1 annot-version=v3.1	-19.1427	0.08065	32986	310	9	9	2	2	3	11	0.272727	0.873817	1	6
c474	c474.a1	c474.a1.a1	Mapoly0089s0004.1.p	pacid=33014535 transcript=Mapoly0089s0004.1 locus=Mapoly0089s0004 ID=Mapoly0089s0004.1.v3.1 annot-version=v3.1	-15.2958	0.02091	123824	1148	9	9	2	2	2	31	0.0645161	0.160155	1	5
c475	c475.a1	c475.a1.a1	Mapoly0008s0097.1.p	pacid=33026530 transcript=Mapoly0008s0097.1 locus=Mapoly0008s0097 ID=Mapoly0008s0097.1.v3.1 annot-version=v3.1	-12.2464	0.096	27474.1	250	8	8	2	2	2	7	0.285714	0.930698	2	7
c475	c475.a1	c475.a1.a2	Mapoly0008s0109.1.p	pacid=33026360 transcript=Mapoly0008s0109.1 locus=Mapoly0008s0109 ID=Mapoly0008s0109.1.v3.1 annot-version=v3.1	-12.2464	0.096	27450.1	250	8	8	2	2	2	10	0.2	0.584893	2	7
c476	c476.a1	c476.a1.a1	Mapoly0080s0051.1.p	pacid=33023746 transcript=Mapoly0080s0051.1 locus=Mapoly0080s0051 ID=Mapoly0080s0051.1.v3.1 annot-version=v3.1	-13.6759	0.03453	72621.8	666	8	8	2	2	2	27	0.0740741	0.185971	2	4
c476	c476.a1	c476.a1.a2	Mapoly0080s0051.2.p	pacid=33023747 transcript=Mapoly0080s0051.2 locus=Mapoly0080s0051 ID=Mapoly0080s0051.2.v3.1 annot-version=v3.1	-13.6759	0.03453	72782.9	666	8	8	2	2	2	28	0.0714286	0.178769	2	4
c477	c477.a1	c477.a1.a1	Mapoly0001s0462.1.p	pacid=33020103 transcript=Mapoly0001s0462.1 locus=Mapoly0001s0462 ID=Mapoly0001s0462.1.v3.1 annot-version=v3.1	-13.8948	0.03463	74346.2	693	8	8	2	2	3	25	0.12	0.318257	1	5
c478	c478.a1	c478.a1.a1	Mapoly0031s0039.1.p	pacid=33022785 transcript=Mapoly0031s0039.1 locus=Mapoly0031s0039 ID=Mapoly0031s0039.1.v3.1 annot-version=v3.1	-5.50836	0.13223	37559.7	363	8	8	2	2	2	15	0.133333	0.359356	1	6
c479	c479.a1	c479.a1.a1	Mapoly0043s0018.1.p	pacid=33021228 transcript=Mapoly0043s0018.1 locus=Mapoly0043s0018 ID=Mapoly0043s0018.1.v3.1 annot-version=v3.1	-16.1518	0.27119	11761.9	118	8	8	2	2	2	5	0.4	1.51189	1	7
c480	c480.a1	c480.a1.a1	Mapoly0058s0006.1.p	pacid=33022975 transcript=Mapoly0058s0006.1 locus=Mapoly0058s0006 ID=Mapoly0058s0006.1.v3.1 annot-version=v3.1	-7.16622	0.08088	28341.3	272	8	8	2	2	2	15	0.133333	0.359356	1	7
c481	c481.a1	c481.a1.a1	Mapoly0060s0105.1.p	pacid=33018347 transcript=Mapoly0060s0105.1 locus=Mapoly0060s0105 ID=Mapoly0060s0105.1.v3.1 annot-version=v3.1	-14.214	0.10345	26247.9	261	8	8	2	2	2	13	0.153846	0.425103	1	5
c482	c482.a1	c482.a1.a1	Mapoly0088s0032.1.p	pacid=33012043 transcript=Mapoly0088s0032.1 locus=Mapoly0088s0032 ID=Mapoly0088s0032.1.v3.1 annot-version=v3.1	-5.2161	0.13393	12022.9	112	8	8	2	2	2	4	0.5	2.16228	1	7
c483	c483.a1	c483.a1.a1	Mapoly0014s0104.1.p	pacid=33015434 transcript=Mapoly0014s0104.1 locus=Mapoly0014s0104 ID=Mapoly0014s0104.1.v3.1 annot-version=v3.1	-10.1391	0.0515	25097	233	7	7	2	2	2	9	0.222222	0.668101	1	5
c484	c484.a1	c484.a1.a1	Mapoly0028s0135.1.p	pacid=33018160 transcript=Mapoly0028s0135.1 locus=Mapoly0028s0135 ID=Mapoly0028s0135.1.v3.1 annot-version=v3.1	-18.1739	0.18257	25378.6	241	7	7	2	2	2	11	0.181818	0.519911	1	6
c485	c485.a1	c485.a1.a1	Mapoly0030s0116.1.p	pacid=33006832 transcript=Mapoly0030s0116.1 locus=Mapoly0030s0116 ID=Mapoly0030s0116.1.v3.1 annot-version=v3.1	-14.4559	0.04082	71297.8	637	7	7	2	2	2	19	0.105263	0.274275	1	6
c486	c486.a1	c486.a1.a1	Mapoly0100s0045.1.p	pacid=33027441 transcript=Mapoly0100s0045.1 locus=Mapoly0100s0045 ID=Mapoly0100s0045.1.v3.1 annot-version=v3.1	-18.0757	0.07112	49880.4	464	7	7	2	2	2	8	0.25	0.778279	1	6
c487	c487.a1	c487.a1.a1	Mapoly0001s0368.1.p	pacid=33019984 transcript=Mapoly0001s0368.1 locus=Mapoly0001s0368 ID=Mapoly0001s0368.1.v3.1 annot-version=v3.1	-12.6819	0.04928	54166.4	487	6	6	2	2	2	11	0.181818	0.519911	1	5
c488	c488.a1	c488.a1.a1	Mapoly0016s0172.1.p	pacid=33026964 transcript=Mapoly0016s0172.1 locus=Mapoly0016s0172 ID=Mapoly0016s0172.1.v3.1 annot-version=v3.1	-11.5774	0.05529	44510.8	416	6	6	2	2	3	17	0.176471	0.501311	1	5
c489	c489.a1	c489.a1.a1	Mapoly0058s0002.1.p	pacid=33022870 transcript=Mapoly0058s0002.1 locus=Mapoly0058s0002 ID=Mapoly0058s0002.1.v3.1 annot-version=v3.1	-17.2676	0.08021	41096.9	374	6	6	2	2	2	14	0.142857	0.389495	1	5
c490	c490.a1	c490.a1.a1	Mapoly0074s0029.1.p	pacid=33027696 transcript=Mapoly0074s0029.1 locus=Mapoly0074s0029 ID=Mapoly0074s0029.1.v3.1 annot-version=v3.1	-10.5317	0.07087	27658.8	254	6	6	2	2	2	12	0.166667	0.467799	1	4
c491	c491.a1	c491.a1.a1	Mapoly0084s0066.1.p	pacid=33025749 transcript=Mapoly0084s0066.1 locus=Mapoly0084s0066 ID=Mapoly0084s0066.1.v3.1 annot-version=v3.1	-16.2233	0.05313	55728.5	527	6	6	2	2	2	9	0.222222	0.668101	1	4
c492	c492.a1	c492.a1.a1	Mapoly0097s0080.1.p	pacid=33009746 transcript=Mapoly0097s0080.1 locus=Mapoly0097s0080 ID=Mapoly0097s0080.1.v3.1 annot-version=v3.1	-8.14874	0.15323	14187.4	124	6	6	2	2	2	4	0.5	2.16228	1	5
c493	c493.a1	c493.a1.a1	Mapoly0134s0042.1.p	pacid=33025856 transcript=Mapoly0134s0042.1 locus=Mapoly0134s0042 ID=Mapoly0134s0042.1.v3.1 annot-version=v3.1	-13.312	0.15244	17980.5	164	6	6	2	2	2	1	2	99	1	3
c494	c494.a1	c494.a1.a1	Mapoly0196s0003.1.p	pacid=33009786 transcript=Mapoly0196s0003.1 locus=Mapoly0196s0003 ID=Mapoly0196s0003.1.v3.1 annot-version=v3.1	-15.8125	0.16547	14739.9	139	5	5	2	2	2	8	0.25	0.778279	3	3
c494	c494.a1	c494.a1.a2	Mapoly0196s0004.1.p	pacid=33009773 transcript=Mapoly0196s0004.1 locus=Mapoly0196s0004 ID=Mapoly0196s0004.1.v3.1 annot-version=v3.1	-15.8125	0.16547	14720.9	139	5	5	2	2	2	6	0.333333	1.15443	3	3
c494	c494.a1	c494.a1.a3	Mapoly0196s0005.1.p	pacid=33009777 transcript=Mapoly0196s0005.1 locus=Mapoly0196s0005 ID=Mapoly0196s0005.1.v3.1 annot-version=v3.1	-15.8125	0.16547	14720.9	139	5	5	2	2	2	6	0.333333	1.15443	3	3
c495	c495.a1	c495.a1.a1	Mapoly0143s0002.1.p	pacid=33014467 transcript=Mapoly0143s0002.1 locus=Mapoly0143s0002 ID=Mapoly0143s0002.1.v3.1 annot-version=v3.1	-9.56607	0.04918	45732.3	427	5	5	2	2	2	18	0.111111	0.29155	2	4
c495	c495.a1	c495.a1.a2	Mapoly0143s0002.2.p	pacid=33014468 transcript=Mapoly0143s0002.2 locus=Mapoly0143s0002 ID=Mapoly0143s0002.2.v3.1 annot-version=v3.1	-9.56607	0.04918	45732.3	427	5	5	2	2	2	18	0.111111	0.29155	2	4
c496	c496.a1	c496.a1.a1	Mapoly0005s0062.1.p	pacid=33003347 transcript=Mapoly0005s0062.1 locus=Mapoly0005s0062 ID=Mapoly0005s0062.1.v3.1 annot-version=v3.1	-16.7959	0.23423	12135.1	111	5	5	2	2	2	4	0.5	2.16228	1	3
c497	c497.a1	c497.a1.a1	Mapoly0095s0019.1.p	pacid=33008816 transcript=Mapoly0095s0019.1 locus=Mapoly0095s0019 ID=Mapoly0095s0019.1.v3.1 annot-version=v3.1	-8.86902	0.14094	16224.8	149	5	5	2	2	2	7	0.285714	0.930698	1	4
c498	c498.a1	c498.a1.a1	Mapoly0097s0079.1.p	pacid=33009698 transcript=Mapoly0097s0079.1 locus=Mapoly0097s0079 ID=Mapoly0097s0079.1.v3.1 annot-version=v3.1	-6.9307	0.09797	32372.6	296	5	5	2	2	2	7	0.285714	0.930698	1	4
c499	c499.a1	c499.a1.a1	Mapoly0101s0064.1.p	pacid=33003982 transcript=Mapoly0101s0064.1 locus=Mapoly0101s0064 ID=Mapoly0101s0064.1.v3.1 annot-version=v3.1	-19.3768	0.07895	42642.9	380	5	5	2	2	2	20	0.1	0.258925	1	4
c500	c500.a1	c500.a1.a1	Mapoly0316s0001.1.p	pacid=33020973 transcript=Mapoly0316s0001.1 locus=Mapoly0316s0001 ID=Mapoly0316s0001.1.v3.1 annot-version=v3.1	-17.3872	0.05239	47511.2	439	5	5	2	2	2	6	0.333333	1.15443	1	3
c501	c501.a1	c501.a1.a1	Mapoly0164s0015.1.p	pacid=33005831 transcript=Mapoly0164s0015.1 locus=Mapoly0164s0015 ID=Mapoly0164s0015.1.v3.1 annot-version=v3.1	-7.23062	0.1005	20868.9	199	4	4	2	2	2	7	0.285714	0.930698	3	3
c501	c501.a1	c501.a1.a2	Mapoly0164s0015.2.p	pacid=33005832 transcript=Mapoly0164s0015.2 locus=Mapoly0164s0015 ID=Mapoly0164s0015.2.v3.1 annot-version=v3.1	-7.23062	0.10101	20682.8	198	4	4	2	2	2	7	0.285714	0.930698	3	3
c501	c501.a1	c501.a1.a3	Mapoly0164s0015.3.p	pacid=33005833 transcript=Mapoly0164s0015.3 locus=Mapoly0164s0015 ID=Mapoly0164s0015.3.v3.1 annot-version=v3.1	-7.23062	0.10152	20595.8	197	4	4	2	2	2	7	0.285714	0.930698	3	3
c502	c502.a1	c502.a1.a1	Mapoly0023s0144.1.p	pacid=33014060 transcript=Mapoly0023s0144.1 locus=Mapoly0023s0144 ID=Mapoly0023s0144.1.v3.1 annot-version=v3.1	-7.81446	0.03663	61347.8	546	4	4	2	2	2	22	0.0909091	0.232847	2	3
c502	c502.a1	c502.a1.a2	Mapoly0023s0144.2.p	pacid=33014061 transcript=Mapoly0023s0144.2 locus=Mapoly0023s0144 ID=Mapoly0023s0144.2.v3.1 annot-version=v3.1	-7.81446	0.03774	59490	530	4	4	2	2	2	22	0.0909091	0.232847	2	3
c503	c503.a1	c503.a1.a1	Mapoly0110s0042.1.p	pacid=33016852 transcript=Mapoly0110s0042.1 locus=Mapoly0110s0042 ID=Mapoly0110s0042.1.v3.1 annot-version=v3.1	-7.20066	0.02906	80073.7	757	4	4	2	2	2	22	0.0909091	0.232847	2	3
c503	c503.a1	c503.a1.a2	Mapoly0200s0010.1.p	pacid=33009114 transcript=Mapoly0200s0010.1 locus=Mapoly0200s0010 ID=Mapoly0200s0010.1.v3.1 annot-version=v3.1	-7.20066	0.04846	47965.3	454	4	4	2	2	2	12	0.166667	0.467799	2	3
c504	c504.a1	c504.a1.a1	Mapoly0005s0258.1.p	pacid=33003152 transcript=Mapoly0005s0258.1 locus=Mapoly0005s0258 ID=Mapoly0005s0258.1.v3.1 annot-version=v3.1	-11.87	0.03099	38304	355	4	4	2	2	2	9	0.222222	0.668101	1	3
c505	c505.a1	c505.a1.a1	Mapoly0013s0154.1.p	pacid=33012442 transcript=Mapoly0013s0154.1 locus=Mapoly0013s0154 ID=Mapoly0013s0154.1.v3.1 annot-version=v3.1	-15.3597	0.05017	63963.8	578	4	4	2	2	2	16	0.125	0.333521	1	3
c506	c506.a1	c506.a1.a1	Mapoly0015s0060.1.p	pacid=33019349 transcript=Mapoly0015s0060.1 locus=Mapoly0015s0060 ID=Mapoly0015s0060.1.v3.1 annot-version=v3.1	-10.2729	0.05679	42865.8	405	4	4	2	2	2	20	0.1	0.258925	1	3
c507	c507.a1	c507.a1.a1	Mapoly0084s0084.1.p	pacid=33025745 transcript=Mapoly0084s0084.1 locus=Mapoly0084s0084 ID=Mapoly0084s0084.1.v3.1 annot-version=v3.1	-11.1785	0.22	11435.8	100	4	4	2	2	3	4	0.75	4.62341	1	2
c508	c508.a1	c508.a1.a1	Mapoly0086s0049.1.p	pacid=33023969 transcript=Mapoly0086s0049.1 locus=Mapoly0086s0049 ID=Mapoly0086s0049.1.v3.1 annot-version=v3.1	-8.04721	0.02306	105678	954	4	4	2	2	2	37	0.0540541	0.132541	1	2
c509	c509.a1	c509.a1.a1	Mapoly0148s0012.1.p	pacid=33012127 transcript=Mapoly0148s0012.1 locus=Mapoly0148s0012 ID=Mapoly0148s0012.1.v3.1 annot-version=v3.1	-9.37675	0.04198	54861.8	524	4	4	2	2	3	13	0.230769	0.701254	1	2
c510	c510.a1	c510.a1.a1	Mapoly0156s0008.1.p	pacid=33010221 transcript=Mapoly0156s0008.1 locus=Mapoly0156s0008 ID=Mapoly0156s0008.1.v3.1 annot-version=v3.1	-12.8861	0.02573	125711	1166	4	4	2	2	2	38	0.0526316	0.128838	1	2
c511	c511.a1	c511.a1.a1	Mapoly0023s0119.1.p	pacid=33014166 transcript=Mapoly0023s0119.1 locus=Mapoly0023s0119 ID=Mapoly0023s0119.1.v3.1 annot-version=v3.1	-9.54363	0.05047	58022.6	535	3	3	2	2	2	32	0.0625	0.154782	2	2
c511	c511.a1	c511.a1.a2	Mapoly0023s0119.2.p	pacid=33014167 transcript=Mapoly0023s0119.2 locus=Mapoly0023s0119 ID=Mapoly0023s0119.2.v3.1 annot-version=v3.1	-9.54363	0.05056	57894.5	534	3	3	2	2	2	32	0.0625	0.154782	2	2
c512	c512.a1	c512.a1.a1	Mapoly0063s0011.1.p	pacid=33008919 transcript=Mapoly0063s0011.1 locus=Mapoly0063s0011 ID=Mapoly0063s0011.1.v3.1 annot-version=v3.1	-6.91507	0.1746	6985.92	63	3	3	2	2	2	1	2	99	2	2
c512	c512.a1	c512.a1.a2	Mapoly0069s0078.1.p	pacid=33018870 transcript=Mapoly0069s0078.1 locus=Mapoly0069s0078 ID=Mapoly0069s0078.1.v3.1 annot-version=v3.1	-6.91507	0.1746	6967.92	63	3	3	2	2	2	1	2	99	2	2
c513	c513.a1	c513.a1.a1	Mapoly0015s0123.1.p	pacid=33019565 transcript=Mapoly0015s0123.1 locus=Mapoly0015s0123 ID=Mapoly0015s0123.1.v3.1 annot-version=v3.1	-14.2676	0.07918	38456.6	341	3	3	2	2	2	16	0.125	0.333521	1	2
c514	c514.a1	c514.a1.a1	Mapoly0024s0048.1.p	pacid=33023033 transcript=Mapoly0024s0048.1 locus=Mapoly0024s0048 ID=Mapoly0024s0048.1.v3.1 annot-version=v3.1	-10.6938	0.05542	42056.6	397	3	3	2	2	2	16	0.125	0.333521	1	2
c515	c515.a1	c515.a1.a1	Mapoly0041s0082.1.p	pacid=33005002 transcript=Mapoly0041s0082.1 locus=Mapoly0041s0082 ID=Mapoly0041s0082.1.v3.1 annot-version=v3.1	-9.01773	0.02985	74129.3	670	3	3	2	2	2	26	0.0769231	0.193777	1	2
c516	c516.a1	c516.a1.a1	Mapoly0051s0068.1.p	pacid=33021641 transcript=Mapoly0051s0068.1 locus=Mapoly0051s0068 ID=Mapoly0051s0068.1.v3.1 annot-version=v3.1	-15.697	0.02843	112253	1020	3	3	2	2	2	44	0.0454545	0.110336	1	2
c517	c517.a1	c517.a1.a1	Mapoly0064s0027.1.p	pacid=33013475 transcript=Mapoly0064s0027.1 locus=Mapoly0064s0027 ID=Mapoly0064s0027.1.v3.1 annot-version=v3.1	-12.7174	0.06336	38904.9	363	3	3	2	2	2	16	0.125	0.333521	1	2
c518	c518.a1	c518.a1.a1	Mapoly0071s0012.1.p	pacid=33008010 transcript=Mapoly0071s0012.1 locus=Mapoly0071s0012 ID=Mapoly0071s0012.1.v3.1 annot-version=v3.1	-16.8063	0.05082	66353.2	610	3	3	2	2	2	31	0.0645161	0.160155	1	2
c519	c519.a1	c519.a1.a1	Mapoly0071s0016.1.p	pacid=33008044 transcript=Mapoly0071s0016.1 locus=Mapoly0071s0016 ID=Mapoly0071s0016.1.v3.1 annot-version=v3.1	-13.0287	0.02748	94125	837	3	3	2	2	2	39	0.0512821	0.125336	1	2
c520	c520.a1	c520.a1.a1	Mapoly0072s0036.1.p	pacid=33008694 transcript=Mapoly0072s0036.1 locus=Mapoly0072s0036 ID=Mapoly0072s0036.1.v3.1 annot-version=v3.1	-7.27737	0.03983	52248.6	477	3	3	2	2	2	27	0.0740741	0.185971	1	2
c521	c521.a1	c521.a1.a1	Mapoly0083s0062.1.p	pacid=33025384 transcript=Mapoly0083s0062.1 locus=Mapoly0083s0062 ID=Mapoly0083s0062.1.v3.1 annot-version=v3.1	-7.76904	0.03912	66174.5	588	3	3	2	2	2	33	0.0606061	0.149757	1	2
c522	c522.a1	c522.a1.a1	Mapoly0086s0068.1.p	pacid=33023979 transcript=Mapoly0086s0068.1 locus=Mapoly0086s0068 ID=Mapoly0086s0068.1.v3.1 annot-version=v3.1	-10.8345	0.051	59365.2	549	3	3	2	2	2	17	0.117647	0.311134	1	2
c523	c523.a1	c523.a1.a1	Mapoly0131s0009.1.p	pacid=33013996 transcript=Mapoly0131s0009.1 locus=Mapoly0131s0009 ID=Mapoly0131s0009.1.v3.1 annot-version=v3.1	-7.51145	0.13423	16681.9	149	3	3	2	2	3	6	0.5	2.16228	1	1
c524	c524.a1	c524.a1.a1	Mapoly0160s0023.1.p	pacid=33018599 transcript=Mapoly0160s0023.1 locus=Mapoly0160s0023 ID=Mapoly0160s0023.1.v3.1 annot-version=v3.1	-6.2426	0.1005	21947.5	199	3	3	2	2	2	13	0.153846	0.425103	1	2
c525	c525.a1	c525.a1.a1	Mapoly0127s0029.1.p	pacid=33009134 transcript=Mapoly0127s0029.1 locus=Mapoly0127s0029 ID=Mapoly0127s0029.1.v3.1 annot-version=v3.1	-12.1952	0.07622	36930.7	328	2	2	2	2	2	16	0.125	0.333521	3	1
c525	c525.a1	c525.a1.a2	Mapoly0127s0029.2.p	pacid=33009136 transcript=Mapoly0127s0029.2 locus=Mapoly0127s0029 ID=Mapoly0127s0029.2.v3.1 annot-version=v3.1	-12.1952	0.07764	36270.3	322	2	2	2	2	2	15	0.133333	0.359356	3	1
c525	c525.a1	c525.a1.a3	Mapoly0127s0029.3.p	pacid=33009135 transcript=Mapoly0127s0029.3 locus=Mapoly0127s0029 ID=Mapoly0127s0029.3.v3.1 annot-version=v3.1	-12.1952	0.07764	36270.3	322	2	2	2	2	2	15	0.133333	0.359356	3	1
c526	c526.a1	c526.a1.a1	Mapoly0001s0564.1.p	pacid=33020445 transcript=Mapoly0001s0564.1 locus=Mapoly0001s0564 ID=Mapoly0001s0564.1.v3.1 annot-version=v3.1	-20.147	0.1147	29883.6	279	2	2	2	2	2	7	0.285714	0.930698	2	1
c526	c526.a1	c526.a1.a2	Mapoly0065s0057.1.p	pacid=33004484 transcript=Mapoly0065s0057.1 locus=Mapoly0065s0057 ID=Mapoly0065s0057.1.v3.1 annot-version=v3.1	-20.147	0.11388	30188.5	281	2	2	2	2	2	6	0.333333	1.15443	2	1
c527	c527.a1	c527.a1.a1	Mapoly0008s0167.1.p	pacid=33026598 transcript=Mapoly0008s0167.1 locus=Mapoly0008s0167 ID=Mapoly0008s0167.1.v3.1 annot-version=v3.1	-10.1681	0.10959	24389.2	219	2	2	2	2	2	7	0.285714	0.930698	2	1
c527	c527.a1	c527.a1.a2	Mapoly0008s0167.2.p	pacid=33026599 transcript=Mapoly0008s0167.2 locus=Mapoly0008s0167 ID=Mapoly0008s0167.2.v3.1 annot-version=v3.1	-10.1681	0.10959	24389.2	219	2	2	2	2	2	7	0.285714	0.930698	2	1
c528	c528.a1	c528.a1.a1	Mapoly0022s0125.1.p	pacid=33011015 transcript=Mapoly0022s0125.1 locus=Mapoly0022s0125 ID=Mapoly0022s0125.1.v3.1 annot-version=v3.1	-10.5452	0.0229	103411	917	2	2	2	2	2	33	0.0606061	0.149757	2	1
c528	c528.a1	c528.a1.a2	Mapoly0022s0125.2.p	pacid=33011016 transcript=Mapoly0022s0125.2 locus=Mapoly0022s0125 ID=Mapoly0022s0125.2.v3.1 annot-version=v3.1	-10.5452	0.0229	103411	917	2	2	2	2	2	33	0.0606061	0.149757	2	1
c529	c529.a1	c529.a1.a1	Mapoly0001s0206.1.p	pacid=33020515 transcript=Mapoly0001s0206.1 locus=Mapoly0001s0206 ID=Mapoly0001s0206.1.v3.1 annot-version=v3.1	-10.7258	0.03222	96288.9	869	2	2	2	2	2	35	0.0571429	0.140625	1	1
c530	c530.a1	c530.a1.a1	Mapoly0001s0306.1.p	pacid=33020385 transcript=Mapoly0001s0306.1 locus=Mapoly0001s0306 ID=Mapoly0001s0306.1.v3.1 annot-version=v3.1	-7.98088	0.06799	37846.9	353	2	2	2	2	2	15	0.133333	0.359356	1	1
c531	c531.a1	c531.a1.a1	Mapoly0002s0049.1.p	pacid=33023285 transcript=Mapoly0002s0049.1 locus=Mapoly0002s0049 ID=Mapoly0002s0049.1.v3.1 annot-version=v3.1	-9.36201	0.01248	248254	2244	2	2	2	2	2	100	0.02	0.0471285	1	1
c532	c532.a1	c532.a1.a1	Mapoly0014s0211.1.p	pacid=33015477 transcript=Mapoly0014s0211.1 locus=Mapoly0014s0211 ID=Mapoly0014s0211.1.v3.1 annot-version=v3.1	-6.88941	0.05809	77865.2	723	2	2	2	2	2	31	0.0645161	0.160155	1	1
c533	c533.a1	c533.a1.a1	Mapoly0016s0063.1.p	pacid=33026994 transcript=Mapoly0016s0063.1 locus=Mapoly0016s0063 ID=Mapoly0016s0063.1.v3.1 annot-version=v3.1	-12.0472	0.1134	21208.4	194	2	2	2	2	2	6	0.333333	1.15443	1	1
c534	c534.a1	c534.a1.a1	Mapoly0016s0134.1.p	pacid=33027157 transcript=Mapoly0016s0134.1 locus=Mapoly0016s0134 ID=Mapoly0016s0134.1.v3.1 annot-version=v3.1	-19.2557	0.12153	30136.9	288	2	2	2	2	2	6	0.333333	1.15443	1	1
c535	c535.a1	c535.a1.a1	Mapoly0030s0029.1.p	pacid=33006743 transcript=Mapoly0030s0029.1 locus=Mapoly0030s0029 ID=Mapoly0030s0029.1.v3.1 annot-version=v3.1	-18.5229	0.05388	65658.6	631	2	2	2	2	2	29	0.0689655	0.172102	1	1
c536	c536.a1	c536.a1.a1	Mapoly0033s0163.1.p	pacid=33003904 transcript=Mapoly0033s0163.1 locus=Mapoly0033s0163 ID=Mapoly0033s0163.1.v3.1 annot-version=v3.1	-14.2518	0.09034	35123.4	321	2	2	2	2	2	9	0.222222	0.668101	1	1
c537	c537.a1	c537.a1.a1	Mapoly0038s0087.1.p	pacid=33004867 transcript=Mapoly0038s0087.1 locus=Mapoly0038s0087 ID=Mapoly0038s0087.1.v3.1 annot-version=v3.1	-13.937	0.10141	38977.7	355	2	2	2	2	2	6	0.333333	1.15443	1	1
c538	c538.a1	c538.a1.a1	Mapoly0046s0069.1.p	pacid=33006433 transcript=Mapoly0046s0069.1 locus=Mapoly0046s0069 ID=Mapoly0046s0069.1.v3.1 annot-version=v3.1	-8.22753	0.06169	32749.2	308	2	2	2	2	2	15	0.133333	0.359356	1	1
c539	c539.a1	c539.a1.a1	Mapoly0047s0069.1.p	pacid=33013919 transcript=Mapoly0047s0069.1 locus=Mapoly0047s0069 ID=Mapoly0047s0069.1.v3.1 annot-version=v3.1	-10.0458	0.04673	57309.5	535	2	2	2	2	2	25	0.08	0.202264	1	1
c540	c540.a1	c540.a1.a1	Mapoly0052s0049.1.p	pacid=33026751 transcript=Mapoly0052s0049.1 locus=Mapoly0052s0049 ID=Mapoly0052s0049.1.v3.1 annot-version=v3.1	-15.5376	0.08564	42503	397	2	2	2	2	2	12	0.166667	0.467799	1	1
c541	c541.a1	c541.a1.a1	Mapoly0068s0097.1.p	pacid=33024886 transcript=Mapoly0068s0097.1 locus=Mapoly0068s0097 ID=Mapoly0068s0097.1.v3.1 annot-version=v3.1	-6.49621	0.04523	44195.4	398	2	2	2	2	2	20	0.1	0.258925	1	1
c542	c542.a1	c542.a1.a1	Mapoly0088s0003.1.p	pacid=33012001 transcript=Mapoly0088s0003.1 locus=Mapoly0088s0003 ID=Mapoly0088s0003.1.v3.1 annot-version=v3.1	-9.35458	0.05081	46869.8	433	2	2	2	2	2	21	0.0952381	0.245197	1	1
c543	c543.a1	c543.a1.a1	Mapoly0102s0002.1.p	pacid=33007469 transcript=Mapoly0102s0002.1 locus=Mapoly0102s0002 ID=Mapoly0102s0002.1.v3.1 annot-version=v3.1	-8.27984	0.04575	51727.1	459	2	2	2	2	2	23	0.0869565	0.221677	1	1
c544	c544.a1	c544.a1.a1	Mapoly0148s0041.1.p	pacid=33012126 transcript=Mapoly0148s0041.1 locus=Mapoly0148s0041 ID=Mapoly0148s0041.1.v3.1 annot-version=v3.1	-11.6799	0.07558	35053.2	344	2	2	2	2	2	15	0.133333	0.359356	1	1
c545	c545.a1	c545.a1.a1	Mapoly0206s0010.1.p	pacid=33011853 transcript=Mapoly0206s0010.1 locus=Mapoly0206s0010 ID=Mapoly0206s0010.1.v3.1 annot-version=v3.1	-9.25337	0.07553	35459.4	331	2	2	2	2	2	15	0.133333	0.359356	1	1

## Sheet: peptides
Group ID	Peptide ID	SequenceLI	Modifs	Charge	MH+ theo	Number of subgroups	Subgroup ids	Number of spectra
a1	pepa1a1	AAFGGSGGRGSSSGGGY		2	1431.62	1	a1.a2	4
a1	pepa1a2	AAFGGSGGRGSSSGGGYSSGSS		2	1836.77	1	a1.a2	1
a1	pepa1a3	AAFGGSGGRGSSSGGGYSSGSSSYGSGGR		3	2501.07	1	a1.a2	10
a1	pepa1a4	ADTITDEINFIR		2	1407.71	2	a1.a3 a1.a4	11
a1	pepa1a5	ADTITDEINFIR	9N:0.98	2	1408.7	2	a1.a3 a1.a4	1
a1	pepa1a6	AEAEAIYQTK		2	1123.56	2	a1.b12 a1.b14	7
a1	pepa1a7	AEAESIYQSK		2	1125.54	1	a1.a1	4
a1	pepa1a8	AEAESIYQSK	8Q:0.98	2	1126.53	1	a1.a1	1
a1	pepa1a9	AEAESIYQSKYEEI		2	1659.77	1	a1.a1	1
a1	pepa1b10	AEAESIYQSKYEEIQITAGR		2	2286.12	1	a1.a1	17
a1	pepa1b11	AEAESIYQSKYEEIQITAGR	15Q:0.98	3	2287.11	1	a1.a1	1
a1	pepa1b12	AEAESWYQTK		2	1212.55	3	a1.a3 a1.a4 a1.b10	4
a1	pepa1b13	AEAESWYQTKYEEIQVTAGR		3	2359.12	3	a1.a3 a1.a4 a1.b10	1
a1	pepa1b14	AEAESWYR	6W:15.99	2	1027.45	2	a1.a6 a1.a7	1
a1	pepa1b15	AENEFVTIK		2	1050.55	4	a1.a1 a1.a3 a1.a4 a1.b14	2
a1	pepa1b16	AFGGSGGRGSSSGGGYSSGSSSYGSGGR		3	2430.03	1	a1.a2	8
a1	pepa1b17	AFIDKVR		2	848.499	2	a1.a6 a1.a7	1
a1	pepa1b18	AFSCISACGPR	4C:57.02 8C:57.02	2	1225.55	1	a1.a6	2
a1	pepa1b19	AFSCISACGPRPGR	4C:57.02 8C:57.02	2	1535.72	1	a1.a6	3
a1	pepa1b20	AGGGGGFGAAGGFGGR		2	1252.58	1	a1.a2	8
a1	pepa1b21	AIDIEIATYR		2	1164.63	3	a1.a1 a1.b17 a1.b18	8
a1	pepa1b22	AIGGGISSVGGGSS		2	1105.55	1	a1.a3	2
a1	pepa1b23	AIGGGISSVGGGSSTIK		2	1447.78	1	a1.a3	11
a1	pepa1b24	AIGGGISSVGGGSSTIKY		2	1610.84	1	a1.a3	8
a1	pepa1b25	AIGGGISSVGGGSSTIKYT		2	1711.89	1	a1.a3	2
a1	pepa1b26	AIGGGISSVGGGSSTIKYTTT		2	1913.98	1	a1.a3	2
a1	pepa1b27	AIGGGISSVGGGSSTIKYTTTS		2	2001.01	1	a1.a3	2
a1	pepa1b28	AIGGGISSVGGGSSTIKYTTTSS		2	2088.05	1	a1.a3	1
a1	pepa1b29	AIGGGISSVGGGSSTIKYTTTSSSSR		3	2418.21	1	a1.a3	8
a1	pepa1b30	AIYDAEISQMQTHISDTSVVISMDNNR		3	3038.42	2	a1.a3 a1.a4	2
a1	pepa1b31	AIYDAEISQMQTHISDTSVVISMDNNR	23M:15.99	3	3054.41	2	a1.a3 a1.a4	4
a1	pepa1b32	AIYDAEISQMQTHISDTSVVISMDNNR	10M:15.99 23M:15.99	3	3070.41	2	a1.a3 a1.a4	7
a1	pepa1b33	AKIEAAVAEAEQQGEAAISDAR		2	2228.12	1	a1.a7	3
a1	pepa1b34	AKQDMACIIK	7C:57.02	2	1177.61	1	a1.a7	2
a1	pepa1b35	AKQDMACIIR	7C:57.02	3	1205.61	1	a1.a6	2
a1	pepa1b36	AKQDMACIIR	3Q:0.98 7C:57.02	3	1206.6	1	a1.a6	1
a1	pepa1b37	AKQDMACIIR	3Q:0.98 5M:15.99 7C:57.02	3	1222.59	1	a1.a6	1
a1	pepa1b38	AQYDDIVTR		2	1080.53	1	a1.a6	3
a1	pepa1b39	AQYDDIVTR	2Q:0.98	2	1081.52	1	a1.a6	1
a1	pepa1b40	AQYEDIAQK		2	1065.52	1	a1.b12	8
a1	pepa1b41	AQYEDIAQK	8Q:0.98	2	1066.51	1	a1.b12	1
a1	pepa1b42	AQYEDIAQKS		2	1152.55	1	a1.b12	3
a1	pepa1b43	AQYEDIAQKSK		3	1280.65	1	a1.b12	1
a1	pepa1b44	AQYEDIAQKSKAEAE		3	1680.81	1	a1.b12	1
a1	pepa1b45	AQYEDIAQR		2	1093.53	1	a1.b14	1
a1	pepa1b46	AQYEEIANR		2	1093.53	1	a1.a5	7
a1	pepa1b47	AQYEEIAQR		3	1107.54	3	a1.a2 a1.a3 a1.a4	8
a1	pepa1b48	AQYEEIAQR	2Q:0.98	2	1108.53	3	a1.a2 a1.a3 a1.a4	3
a1	pepa1b49	ASAITPSVSR		2	988.542	2	a1.a5 a1.a8	3
a1	pepa1b50	ASFIDKVR		2	935.531	17	a1.a1 a1.a2 a1.a3 a1.a4 a1.a5 a1.a8 a1.a9 a1.b10 a1.b11 a1.b12 a1.b13 a1.b14 a1.b15 a1.b16 a1.b17 a1.b18 a1.b19	4
a1	pepa1b51	ATAENEFVAIKK		2	1320.72	1	a1.a6	2
a1	pepa1b52	ATAENEFVVIK		2	1220.65	1	a1.a7	1
a1	pepa1b53	ATAENEFVVIKK		3	1348.75	1	a1.a7	1
a1	pepa1b54	ATGGGISSVGGGSSTIK		2	1435.74	1	a1.a4	2
a1	pepa1b55	ATGGGISSVGGGSSTIKY		2	1598.8	1	a1.a4	6
a1	pepa1b56	ATGGGISSVGGGSSTIKYT		2	1699.85	1	a1.a4	1
a1	pepa1b57	ATGGGISSVGGGSSTIKYTTT		2	1901.95	1	a1.a4	1
a1	pepa1b58	ATGGGISSVGGGSSTIKYTTTSSSSR		3	2406.17	1	a1.a4	6
a1	pepa1b59	CCESNIEPIFSGYIETIR	1C:57.02 2C:57.02	2	2188	1	a1.a7	1
a1	pepa1b60	CCESNIEPIFSGYIETIRR	1C:57.02 2C:57.02	3	2344.11	1	a1.a7	1
a1	pepa1b61	CCISAAPYR	1C:57.02 2C:57.02	3	1097.49	1	a1.a7	1
a1	pepa1b62	CCITAAPYR	1C:-17.03|57.02 2C:57.02	2	1094.48	1	a1.a6	1
a1	pepa1b63	CCITAAPYR	1C:57.02 2C:57.02	2	1111.5	1	a1.a6	2
a1	pepa1b64	CISACGPRPGR	1C:57.02 5C:57.02	2	1230.58	1	a1.a6	1
a1	pepa1b65	CKIAEIEGAIQK	1C:-17.03|57.02	2	1342.7	2	a1.a6 a1.a7	2
a1	pepa1b66	CKIAEIEGAIQK	1C:57.02	3	1359.73	2	a1.a6 a1.a7	1
a1	pepa1b67	CQNSKIEAAVAQSEQQGEAAISDAR	1C:-17.03|57.02	3	2644.23	1	a1.a6	1
a1	pepa1b68	DIDSIIAEVK		2	1102.6	9	a1.a1 a1.a2 a1.a3 a1.a4 a1.a5 a1.a8 a1.b10 a1.b12 a1.b20	2
a1	pepa1b69	DINMDCIIAEIK	6C:57.02	2	1434.7	2	a1.a6 a1.a7	2
a1	pepa1b70	DINMDCIIAEIK	4M:15.99 6C:57.02	2	1450.69	2	a1.a6 a1.a7	6
a1	pepa1b71	DVDAAYMNKVEIEAK		2	1695.83	2	a1.a5 a1.b10	8
a1	pepa1b72	DVDAAYMNKVEIEAK	7M:15.99	2	1711.82	2	a1.a5 a1.b10	9
a1	pepa1b73	DVDAAYMNKVEIQAK		2	1694.84	3	a1.a3 a1.a4 a1.b13	16
a1	pepa1b74	DVDAAYMNKVEIQAK	8N:0.98	2	1695.83	3	a1.a3 a1.a4 a1.b13	2
a1	pepa1b75	DVDAAYMNKVEIQAK	7M:15.99	2	1710.84	3	a1.a3 a1.a4 a1.b13	12
a1	pepa1b76	DVDCAYIRK	4C:57.02	2	1139.55	2	a1.a6 a1.a7	2
a1	pepa1b77	DVDGAYMTKVDIQAK		3	1653.82	1	a1.a1	6
a1	pepa1b78	DVDGAYMTKVDIQAK	7M:15.99	2	1669.81	1	a1.a1	10
a1	pepa1b79	DVDNAYMIKVEIQSK		2	1752.88	1	a1.a2	2
a1	pepa1b80	DVDNAYMIKVEIQSK	7M:15.99	3	1768.88	1	a1.a2	1
a1	pepa1b81	DYQEIMNTK		2	1141.52	2	a1.a1 a1.a9	9
a1	pepa1b82	DYQEIMNTK	3Q:0.98	2	1142.5	2	a1.a1 a1.a9	5
a1	pepa1b83	DYQEIMNTK	6M:15.99	2	1157.51	2	a1.a1 a1.a9	11
a1	pepa1b84	DYQEIMNTK	6M:15.99 7N:0.98	2	1158.5	2	a1.a1 a1.a9	3
a1	pepa1b85	DYQEIMNVK		2	1139.54	3	a1.a2 a1.b14 a1.b16	1
a1	pepa1b86	ECCQSNIEPIFEGYIETIRR	2C:57.02 3C:57.02	3	2514.18	1	a1.a6	1
a1	pepa1b87	EDAIQKAKQDIAR	5Q:0.98 9Q:0.98	2	1487.77	2	a1.a3 a1.a4	1
a1	pepa1b88	EEIQITAGR		2	1016.54	1	a1.a1	3
a1	pepa1b89	EIDPEIQK		2	971.504	3	a1.a1 a1.b13 a1.b15	3
a1	pepa1b90	EIDPEIQKVK		2	1198.67	1	a1.a1	12
a1	pepa1b91	EIIQQVDTSTR		2	1289.67	1	a1.a1	9
a1	pepa1b92	EIKIEISEINR		2	1343.75	1	a1.a2	17
a1	pepa1b93	EQIMVINNK	4M:15.99	2	1104.57	1	a1.b11	3
a1	pepa1b94	EREQIKSINNQFAS		3	1663.84	1	a1.a1	1
a1	pepa1b95	ETNVIISMDNNR		2	1405.67	1	a1.a1	1
a1	pepa1b96	FAAFIDKVR		3	1066.6	2	a1.a6 a1.a7	1
a1	pepa1b97	FASFIDKV		2	926.498	17	a1.a2 a1.a3 a1.a4 a1.a5 a1.a8 a1.a9 a1.b10 a1.b11 a1.b12 a1.b13 a1.b14 a1.b15 a1.b16 a1.b17 a1.b18 a1.b19 a1.b20	1
a1	pepa1b98	FASFIDKVQFIEQQNK		3	1942.01	1	a1.b20	2
a1	pepa1b99	FASFIDKVR		2	1082.6	17	a1.a1 a1.a2 a1.a3 a1.a4 a1.a5 a1.a8 a1.a9 a1.b10 a1.b11 a1.b12 a1.b13 a1.b14 a1.b15 a1.b16 a1.b17 a1.b18 a1.b19	18
a1	pepa1c100	FESFINNIR		2	1139.58	1	a1.a1	2
a1	pepa1c101	FGGFGGPGGVGGIGGPGGFGPGGYPGGIHEV		3	2671.27	1	a1.a2	7
a1	pepa1c102	FGGFGGPGGVGGIGGPGGFGPGGYPGGIHEV	16P:15.99	3	2687.26	1	a1.a2	1
a1	pepa1c103	FGGFGGPGGVGGIGGPGGFGPGGYPGGIHEVSVNQSIIQPINVK		3	4092.07	1	a1.a2	3
a1	pepa1c104	FGGSGGRGSSSGGGYSSGSSSYGSGGR		3	2358.99	1	a1.a2	3
a1	pepa1c105	FIEQQNKIIETK		2	1490.82	4	a1.a6 a1.a7 a1.b18 a1.b19	2
a1	pepa1c106	FIEQQNKV		2	1005.54	9	a1.a3 a1.a4 a1.a5 a1.a8 a1.b10 a1.b12 a1.b14 a1.b15 a1.b16	1
a1	pepa1c107	FIEQQNKVIDTK		2	1462.79	4	a1.a4 a1.a5 a1.a8 a1.b20	1
a1	pepa1c108	FIEQQNKVIETK		2	1476.81	6	a1.a3 a1.b10 a1.b12 a1.b14 a1.b15 a1.b16	4
a1	pepa1c109	FIEQQNQVIETK		2	1476.77	1	a1.b13	3
a1	pepa1c110	FIEQQNQVIQTK		2	1475.79	3	a1.a1 a1.a2 a1.b11	29
a1	pepa1c111	FIEQQNQVIQTK	6N:0.98	2	1476.77	3	a1.a1 a1.a2 a1.b11	9
a1	pepa1c112	FIEQQNQVIQTKWEIIQQVDTSTR		3	2932.52	1	a1.a1	5
a1	pepa1c113	FIEQQNQVIQTKWEIIQQVDTSTR	13W:15.99	3	2948.51	1	a1.a1	1
a1	pepa1c114	FIEQQNQVIQTKWEIIQQVDTSTR	6N:0.98 13W:15.99	3	2949.5	1	a1.a1	1
a1	pepa1c115	FSSCGGGGGSFGAGGGFGSR	4C:57.02	2	1765.73	1	a1.a1	26
a1	pepa1c116	FSSGSAVVSGGSR		2	1197.59	2	a1.a2 a1.a9	3
a1	pepa1c117	FSSGSAVVSGGSRR		3	1353.69	2	a1.a2 a1.a9	4
a1	pepa1c118	FVSTTYSGVTR		2	1217.62	1	a1.a1	7
a1	pepa1c119	GFGSHSVCGGFR	8C:57.02	3	1267.56	1	a1.a6	1
a1	pepa1c120	GFSANSARIPGVSR		3	1418.75	1	a1.a3	5
a1	pepa1c121	GFSASSARIPGVSR		3	1391.74	1	a1.a4	2
a1	pepa1c122	GFSSGSAVVSGGSR		2	1254.61	2	a1.a2 a1.a9	12
a1	pepa1c123	GFSSGSAVVSGGSRR		2	1410.71	2	a1.a2 a1.a9	17
a1	pepa1c124	GFSSVSVSR		2	925.474	1	a1.a3	5
a1	pepa1c125	GGGFGGGGFGSR		2	1012.46	1	a1.a2	1
a1	pepa1c126	GGGGFGAAGGFGGR		2	1124.52	1	a1.a2	2
a1	pepa1c127	GGGGGFGAAGGFGGR		2	1181.54	1	a1.a2	6
a1	pepa1c128	GGGGGGFRGFSSGSAVVSGGSR		3	1899.91	2	a1.a2 a1.a9	10
a1	pepa1c129	GGGGGGFRGFSSGSAVVSGGSRR		3	2056.01	2	a1.a2 a1.a9	5
a1	pepa1c130	GGGGGGYGSGGSSYGSGGGSY		2	1684.65	1	a1.a1	1
a1	pepa1c131	GGGGGGYGSGGSSYGSGGGSYGSGGGGGGGR		2	2383.95	1	a1.a1	30
a1	pepa1c132	GGGGGGYGSGGSSYGSGGGSYGSGGGGGGGRG		2	2440.97	1	a1.a1	4
a1	pepa1c133	GGGGGSFGAGGGFGSR		2	1284.57	1	a1.a1	9
a1	pepa1c134	GGGGSFGAGGGFGSR		2	1227.55	1	a1.a1	7
a1	pepa1c135	GGGISVGGSGFSASSGR		2	1439.69	1	a1.a5	1
a1	pepa1c136	GGGSFGAGGGFGSR		2	1170.53	1	a1.a1	3
a1	pepa1c137	GGGSGFSGGGFGGGGFGGGR		2	1588.69	1	a1.a2	8
a1	pepa1c138	GGGSRGGGGGGYGSGGSSYGSGGGSYGSGGGGGGGR		3	2798.15	1	a1.a1	2
a1	pepa1c139	GGGSYGSGGGGGGHGSYGSGSSSGGYR		3	2265.91	1	a1.a1	8
a1	pepa1c140	GGSFGAGGGFGSR		2	1113.51	1	a1.a1	3
a1	pepa1c141	GGSGFSGGGFGGGGFGGGR		2	1531.67	1	a1.a2	2
a1	pepa1c142	GGSGGGGGGSSGGRGSGGGSSGGSIGGR		3	2079.91	1	a1.a1	1
a1	pepa1c143	GGSGGGGSISGGGYGSGGGSGGR		2	1741.75	1	a1.a2	18
a1	pepa1c144	GGSGGGGSISGGGYGSGGGSGGRYGSG		3	2105.89	1	a1.a2	3
a1	pepa1c145	GGSGGGGSISGGGYGSGGGSGGRYGSGGGSK		3	2435.06	1	a1.a2	1
a1	pepa1c146	GGSKSISISVAR		2	1161.66	1	a1.a1	13
a1	pepa1c147	GGSYGSGGGGGGHGSYGSGSSSGGYR		3	2208.89	1	a1.a1	9
a1	pepa1c148	GGVSCGGISYSTTPGR	5C:57.02	2	1555.72	1	a1.a7	2
a1	pepa1c149	GGVVCGDICASTTAPVVSTR	5C:57.02 9C:57.02	2	2006.96	1	a1.a6	4
a1	pepa1c150	GGVVCGDICASTTAPVVSTR	5C:57.02 9C:57.02 15P:15.99	2	2022.96	1	a1.a6	1
a1	pepa1c151	GIGVGFGSGGGSSSS		2	1212.55	1	a1.a5	1
a1	pepa1c152	GIGVGFGSGGGSSSSV		2	1311.62	1	a1.a5	1
a1	pepa1c153	GIGVGFGSGGGSSSSVK		2	1439.71	1	a1.a5	4
a1	pepa1c154	GIGVGGGFSSSSGR		2	1224.6	2	a1.a3 a1.a4	2
a1	pepa1c155	GISSVGGGSSTIK		2	1149.61	2	a1.a3 a1.a4	2
a1	pepa1c156	GITGFGSR		2	794.416	1	a1.a7	1
a1	pepa1c157	GITGGFGSH		2	832.395	1	a1.a6	1
a1	pepa1c158	GITGGFGSHSVCG	12C:57.02	2	1235.55	1	a1.a6	1
a1	pepa1c159	GITGGFGSHSVCGGFR	12C:57.02	2	1595.74	1	a1.a6	3
a1	pepa1c160	GMQDIVEDFK		2	1181.55	1	a1.a3	7
a1	pepa1c161	GMQDIVEDFK	2M:15.99	2	1197.55	1	a1.a3	2
a1	pepa1c162	GMQDIVEDFKNK		2	1423.69	1	a1.a3	2
a1	pepa1c163	GMQDIVEDFKNK	2M:15.99	2	1439.68	1	a1.a3	3
a1	pepa1c164	GMQDIVEDFKNKYEDEINKR		3	2471.19	1	a1.a3	1
a1	pepa1c165	GMQDIVEDFKNKYEDEINKR	2M:15.99	3	2487.18	1	a1.a3	1
a1	pepa1c166	GRGGGGGGFRGF		3	1081.53	1	a1.a2	3
a1	pepa1c167	GRGGGGGGFRGFSSGSAVVSGGS		3	1956.93	1	a1.a2	1
a1	pepa1c168	GSFGAGGGFGSR		2	1056.49	1	a1.a1	3
a1	pepa1c169	GSGFGGGSGFGGGSGFSGGGFGGGGFGGGR		2	2399.02	1	a1.a2	18
a1	pepa1c170	GSGGGSGSGGGYSSGGGSRGGSGGGGVSSGGGSR		2	2604.1	1	a1.a9	1
a1	pepa1c171	GSGGGSYGSGGGGGGHGSYGSGSSSGGYR		3	2409.97	1	a1.a1	9
a1	pepa1c172	GSGGGSYGSGGGGGGHGSYGSGSSSGGYRGGSGGGGGGSSGGR		3	3397.38	1	a1.a1	1
a1	pepa1c173	GSGGIGGACGGAGFGSR	9C:57.02	3	1424.63	2	a1.a3 a1.a4	1
a1	pepa1c174	GSGIGVGGGFSSSSGR		2	1368.65	2	a1.a3 a1.a4	7
a1	pepa1c175	GSYGSGGGGGGHGSYGSGSSSGGYR		3	2151.87	1	a1.a1	8
a1	pepa1c176	GSYGSGGSSYGSGGGSYGSGGGGGGHGSYGSGSSSGGYR		3	3312.31	1	a1.a1	1
a1	pepa1c177	GVFGGVSGSGSGGYK		2	1315.63	1	a1.b16	2
a1	pepa1c178	HGGGGGGFGGGGFGS		2	1164.48	1	a1.a2	6
a1	pepa1c179	HGGGGGGFGGGGFGSR		2	1320.58	1	a1.a2	19
a1	pepa1c180	HGGGGGGFGGGGFGSRS		3	1407.61	1	a1.a2	1
a1	pepa1c181	IAEIEEAIQK		2	1143.63	1	a1.a5	3
a1	pepa1c182	IAEIEGAIQK		2	1071.6	2	a1.a6 a1.a7	5
a1	pepa1c183	IAEIEGAIQK	9Q:0.98	2	1072.59	2	a1.a6 a1.a7	1
a1	pepa1c184	IAEIEGAIQKAK		2	1270.74	2	a1.a6 a1.a7	2
a1	pepa1c185	IAIDIEIATYR		2	1277.71	3	a1.a1 a1.b17 a1.b18	19
a1	pepa1c186	IAIDVEIATYR		2	1263.69	10	a1.a2 a1.a3 a1.a4 a1.a5 a1.a8 a1.b10 a1.b12 a1.b14 a1.b15 a1.b16	17
a1	pepa1c187	IAIDVEIATYRK		2	1391.79	10	a1.a2 a1.a3 a1.a4 a1.a5 a1.a8 a1.b10 a1.b12 a1.b14 a1.b15 a1.b16	5
a1	pepa1c188	IASEINHVQEVIEGYK		2	1828.94	2	a1.a6 a1.a7	2
a1	pepa1c189	IASEINHVQEVIEGYK	6N:0.98	3	1829.93	2	a1.a6 a1.a7	1
a1	pepa1c190	IASEINHVQEVIEGYKK		3	1957.04	2	a1.a6 a1.a7	2
a1	pepa1c191	ICEGVGSVNVCVSSSR	2C:57.02 11C:57.02	2	1709.79	2	a1.a6 a1.a7	2
a1	pepa1c192	IDIDSIIAEVK		2	1215.68	9	a1.a1 a1.a2 a1.a3 a1.a4 a1.a5 a1.a8 a1.b10 a1.b12 a1.b20	1
a1	pepa1c193	IDIEIATYR		2	1093.59	4	a1.a1 a1.b17 a1.b18 a1.b19	2
a1	pepa1c194	IDPEIQKVK		2	1069.63	1	a1.a1	7
a1	pepa1c195	IDPEIQKVKSR		3	1312.76	1	a1.a1	3
a1	pepa1c196	IDSEIKNMQDMVEDYR		2	1985.89	1	a1.a1	3
a1	pepa1c197	IDSEIKNMQDMVEDYR	11M:15.99	2	2001.89	1	a1.a1	17
a1	pepa1c198	IDSEIKNMQDMVEDYR	8M:15.99 11M:15.99	2	2017.88	1	a1.a1	18
a1	pepa1c199	IDSEIKNMQDMVEDYR	7N:0.98 8M:15.99 11M:15.99	3	2018.87	1	a1.a1	4
a1	pepa1c200	IDSIVGER		2	888.479	3	a1.a3 a1.a4 a1.a5	1
a1	pepa1c201	IEAAVAEAEQQGEAAISDAR		2	2028.98	1	a1.a7	2
a1	pepa1c202	IEAAVAEAEQQGEAAISDAR	11Q:0.98	3	2029.97	1	a1.a7	1
a1	pepa1c203	IEAAVAQSEQQGEAAISDAR		2	2043.99	1	a1.a6	4
a1	pepa1c204	IEAAVAQSEQQGEAAISDAR	11Q:0.98	2	2044.98	1	a1.a6	3
a1	pepa1c205	IEGIEDAIQK		2	1115.59	2	a1.a3 a1.a4	1
a1	pepa1c206	IEQQNQVIQTK		2	1328.72	3	a1.a1 a1.a2 a1.b11	2
a1	pepa1c207	IGIDIEIATYR		2	1263.69	3	a1.a6 a1.a7 a1.b19	3
a1	pepa1c208	IIEGEEQRICEGVGSVNVCVSSSR	10C:57.02 19C:57.02	3	2664.27	1	a1.a6	1
a1	pepa1c209	IIETKIQFYQNR		2	1552.85	1	a1.a6	2
a1	pepa1c210	IIKEYQEIMNVK		3	1507.82	3	a1.a3 a1.a4 a1.b12	2
a1	pepa1c211	IIKEYQEIMNVK	9M:15.99	2	1523.81	3	a1.a3 a1.a4 a1.b12	7
a1	pepa1c212	IIQPINVEIDPEIQK		2	1748.98	1	a1.a1	5
a1	pepa1c213	IIQPINVEIDPEIQKVK		3	1976.14	1	a1.a1	4
a1	pepa1c214	IIQQVDTSTR		2	1160.63	1	a1.a1	4
a1	pepa1c215	IIRDYQEIMNTK		2	1523.79	2	a1.a1 a1.a9	17
a1	pepa1c216	IIRDYQEIMNTK	9M:15.99	2	1539.78	2	a1.a1 a1.a9	9
a1	pepa1c217	IIRDYQEIMNVK		3	1521.81	3	a1.a2 a1.b14 a1.b16	5
a1	pepa1c218	IIRDYQEIMNVK	9M:15.99	2	1537.8	3	a1.a2 a1.b14 a1.b16	7
a1	pepa1c219	IIREYQEIMNTK		3	1537.8	2	a1.a5 a1.a8	2
a1	pepa1c220	IIREYQEIMNTK	9M:15.99	3	1553.8	2	a1.a5 a1.a8	1
a1	pepa1c221	IITPINIQIDPSIQR		2	1721	1	a1.a5	1
a1	pepa1c222	IITPINIQIDPTIQR		2	1735.01	2	a1.a3 a1.a8	1
a1	pepa1c223	IKSINNQFASFIDK	5N:0.98 6N:0.98	2	1626.84	1	a1.a1	1
a1	pepa1c224	INDIEDAIQQAK		2	1357.7	1	a1.a1	12
a1	pepa1c225	INDIEDAIQQAK	10Q:0.98	2	1358.68	1	a1.a1	2
a1	pepa1c226	INDIEDAIQQAKEDIAR		2	1941.99	1	a1.a1	28
a1	pepa1c227	INDIEEAIQQAK		2	1371.71	1	a1.a2	14
a1	pepa1c228	INDIEEAIQQAKEDIAR		3	1956	1	a1.a2	4
a1	pepa1c229	INGEGVGQVNIS		2	1186.61	2	a1.a3 a1.a4	1
a1	pepa1c230	INIQIDPSIQR		2	1296.73	1	a1.a5	1
a1	pepa1c231	INVEIDPEIQK		2	1297.7	2	a1.a1 a1.b13	1
a1	pepa1c232	INVEIDPEIQKVK		2	1524.86	1	a1.a1	6
a1	pepa1c233	IQAEISNVKK		3	1129.66	1	a1.b11	3
a1	pepa1c234	IQDIEEAIQQSKEEIAR		3	2000.03	1	a1.b11	1
a1	pepa1c235	IQIDPAIQR		2	1053.61	1	a1.a4	4
a1	pepa1c236	IQIDPSIQR		2	1069.6	1	a1.a5	2
a1	pepa1c237	IQPINVEIDPEIQK		2	1635.9	1	a1.a1	11
a1	pepa1c238	IQPINVEIDPEIQKVK		3	1863.06	1	a1.a1	2
a1	pepa1c239	IQQSISDAEQR		2	1274.63	1	a1.a1	3
a1	pepa1c240	IRAEIENIKK		3	1213.73	1	a1.b15	7
a1	pepa1c241	IRSEIDNVKK		3	1201.69	2	a1.a1 a1.a8	1
a1	pepa1c242	ISDTSVIVK		2	961.556	1	a1.a7	1
a1	pepa1c243	ISDTSVVISMDNNR	10M:15.99	2	1566.74	3	a1.a3 a1.a4 a1.b14	1
a1	pepa1c244	ISETNVIISMDNNR		2	1605.79	1	a1.a1	3
a1	pepa1c245	ISETNVIISMDNNR	10M:15.99	2	1621.79	1	a1.a1	3
a1	pepa1c246	ISGEGVGPVNISVVTS		2	1514.81	1	a1.a5	1
a1	pepa1c247	ISGGGSRGGGGGGYGSGGSSYGSGGGSYGSGGGGGGGR		3	2998.27	1	a1.a1	2
a1	pepa1c248	ISIGGGSCAISGGYGSR	8C:57.02	2	1598.76	2	a1.a3 a1.a4	9
a1	pepa1c249	ISISTSGGSFR		2	1111.57	1	a1.a5	8
a1	pepa1c250	ISISTSGGSFRNR		3	1381.72	1	a1.a5	2
a1	pepa1c251	ISISTSGGSFRNR	12N:0.98	3	1382.7	1	a1.a5	1
a1	pepa1c252	ISVAGGGGGFGAAGGFGGR		2	1551.77	1	a1.a2	2
a1	pepa1c253	ITAEIENAK	7N:0.98	2	989.515	1	a1.a7	1
a1	pepa1c254	ITAEIENAKCQR	10C:57.02	3	1432.72	1	a1.a7	1
a1	pepa1c255	KAQYEEIAQR		3	1235.64	3	a1.a2 a1.a3 a1.a4	2
a1	pepa1c256	KDVDAAYMNKVEIQAK		3	1822.94	3	a1.a3 a1.a4 a1.b13	1
a1	pepa1c257	KDVDCAYIR	5C:57.02	3	1139.55	2	a1.a6 a1.a7	1
a1	pepa1c258	KDVDNAYMIK		2	1196.6	1	a1.a2	4
a1	pepa1c259	KDVDNAYMIK	8M:15.99	2	1212.59	1	a1.a2	2
a1	pepa1c260	KIEISEINR		2	1101.63	2	a1.a1 a1.a2	3
a1	pepa1c261	KKYEEEVSIR		3	1280.68	1	a1.a6	1
a1	pepa1c262	KQCANIQAAIADAEQR	3C:57.02	3	1786.89	2	a1.a3 a1.a4	1
a1	pepa1c263	KQISNIQQSISDAEQR		2	1844.95	1	a1.a1	17
a1	pepa1c264	KQISNIQQSISDAEQRGENAIK		3	2457.27	1	a1.a1	2
a1	pepa1c265	KRTNAENEFVTIKK		3	1677.93	1	a1.a1	1
a1	pepa1c266	KVDPEIQNVK		2	1169.65	2	a1.a2 a1.a9	6
a1	pepa1c267	KWEIIQQVDTSTR		2	1603.84	1	a1.a1	1
a1	pepa1c268	KYEDEINKR		3	1194.61	12	a1.a1 a1.a2 a1.a3 a1.a4 a1.a5 a1.a8 a1.a9 a1.b11 a1.b14 a1.b16 a1.b17 a1.b20	3
a1	pepa1c269	KYEEEVAIR		2	1136.59	1	a1.a7	1
a1	pepa1c270	KYEEEVSIR		2	1152.59	1	a1.a6	1
a1	pepa1c271	KYEEIQITAGR		2	1307.7	1	a1.a1	4
a1	pepa1c272	MSGDISSNVTVSVTSSTISSNVASK		2	2458.2	1	a1.a2	6
a1	pepa1c273	MSGDISSNVTVSVTSSTISSNVASK	1M:15.99	2	2474.19	1	a1.a2	17
a1	pepa1c274	MSGECAPNVSVSVSTSHTTISGGGSR	5C:57.02	3	2565.17	1	a1.a1	15
a1	pepa1c275	MSGECAPNVSVSVSTSHTTISGGGSR	1M:15.99 5C:57.02	3	2581.16	1	a1.a1	20
a1	pepa1c276	MSGECAPNVSVSVSTSHTTISGGGSR	1M:15.99 5C:57.02 7P:15.99	3	2597.16	1	a1.a1	4
a1	pepa1c277	MSGECAPNVSVSVSTSHTTISGGGSR	1M:15.99 5C:57.02 7P:15.99 8N:0.98	3	2598.14	1	a1.a1	3
a1	pepa1c278	NAENEFVTIKK		2	1292.68	1	a1.a1	1
a1	pepa1c279	NFSSCSAVAPK	5C:57.02	2	1167.55	1	a1.a7	3
a1	pepa1c280	NFSSCSAVAPKTGNR	5C:57.02	3	1595.76	1	a1.a7	2
a1	pepa1c281	NIDIDSIIAEVK		2	1329.73	5	a1.a2 a1.a3 a1.a4 a1.a5 a1.b10	11
a1	pepa1c282	NIGGSKSISISVAR		2	1388.79	1	a1.a1	7
a1	pepa1c283	NIQIDPAIQR		2	1167.65	1	a1.a4	4
a1	pepa1c284	NIQIDPSIQR		2	1183.64	1	a1.a5	7
a1	pepa1c285	NIQIDPTIQR		2	1197.66	2	a1.a3 a1.a8	4
a1	pepa1c286	NKIAEIEEAIQK		2	1385.76	1	a1.a5	6
a1	pepa1c287	NKIEGIEDAIQK		2	1357.73	2	a1.a3 a1.a4	11
a1	pepa1c288	NKIEGIEDAIQK	11Q:0.98	3	1358.72	2	a1.a3 a1.a4	1
a1	pepa1c289	NKINDIEDAIQQAK		2	1599.83	1	a1.a1	15
a1	pepa1c290	NKINDIEDAIQQAK	4N:0.98	2	1600.82	1	a1.a1	28
a1	pepa1c291	NKINDIEDAIQQAKEDIAR		3	2184.13	1	a1.a1	10
a1	pepa1c292	NKINDIEDAIQQAKEDIAR	4N:0.98	3	2185.11	1	a1.a1	3
a1	pepa1c293	NKINDIEEAIQQAK		2	1613.85	1	a1.a2	17
a1	pepa1c294	NKINDIEEAIQQAK	4N:0.98	3	1614.83	1	a1.a2	2
a1	pepa1c295	NKINDIEEAIQQAKEDIAR		3	2198.14	1	a1.a2	1
a1	pepa1c296	NKYEDEINKR		3	1308.65	6	a1.a1 a1.a3 a1.a4 a1.a5 a1.a8 a1.b17	20
a1	pepa1c297	NKYEDEINKR	8N:0.98	3	1309.64	6	a1.a1 a1.a3 a1.a4 a1.a5 a1.a8 a1.b17	4
a1	pepa1c298	NMQDIVEDFK		2	1238.57	2	a1.a5 a1.a9	2
a1	pepa1c299	NMQDIVEDFK	2M:15.99	2	1254.57	2	a1.a5 a1.a9	7
a1	pepa1c300	NMQDIVEDFKNK		3	1480.71	1	a1.a5	2
a1	pepa1c301	NMQDIVEDFKNK	2M:15.99	3	1496.7	1	a1.a5	1
a1	pepa1c302	NMQDIVEDFKNKYEDEINKR		3	2528.21	1	a1.a5	1
a1	pepa1c303	NMQDIVEDIK	2M:15.99	2	1220.58	1	a1.a4	3
a1	pepa1c304	NMQDIVEDIKNK		3	1446.73	1	a1.a4	1
a1	pepa1c305	NMQDMVEDYR		2	1300.53	1	a1.a1	9
a1	pepa1c306	NMQDMVEDYR	1N:0.98	2	1301.51	1	a1.a1	6
a1	pepa1c307	NMQDMVEDYR	2M:15.99	2	1316.52	1	a1.a1	31
a1	pepa1c308	NMQDMVEDYR	1N:0.98 2M:15.99	2	1317.51	1	a1.a1	3
a1	pepa1c309	NMQDMVEDYR	2M:15.99 5M:15.99	2	1332.52	1	a1.a1	23
a1	pepa1c310	NMQDMVEDYR	2M:15.99 3Q:0.98 5M:15.99	2	1333.5	1	a1.a1	2
a1	pepa1c311	NMQDMVEDYRNK		3	1542.67	1	a1.a1	5
a1	pepa1c312	NMQDMVEDYRNK	2M:15.99	3	1558.66	1	a1.a1	7
a1	pepa1c313	NMQDMVEDYRNK	2M:15.99 5M:15.99	3	1574.66	1	a1.a1	9
a1	pepa1c314	NMQDMVEDYRNKYEDEINKR	5M:15.99	3	2606.16	1	a1.a1	1
a1	pepa1c315	NMQDMVEDYRNKYEDEINKR	2M:15.99 5M:15.99	3	2622.16	1	a1.a1	2
a1	pepa1c316	NNQFASFIDKVR		3	1438.74	1	a1.a1	10
a1	pepa1c317	NQFGAGGFGFGGGAGSGFGFGGGA		2	2037.88	1	a1.a8	1
a1	pepa1c318	NQSIIQPINVEIDPEIQK		3	2078.11	1	a1.a1	1
a1	pepa1c319	NRNIDIDSIIAEVK	1N:0.98	2	1600.85	4	a1.a3 a1.a4 a1.a5 a1.b10	3
a1	pepa1c320	NRSIDIDSIIAEVK	1N:0.98	2	1573.84	3	a1.a1 a1.a8 a1.b20	1
a1	pepa1c321	NSKIEISEINR		2	1302.7	1	a1.a1	18
a1	pepa1c322	NSKIEISEINR	1N:0.98	2	1303.69	1	a1.a1	8
a1	pepa1c323	NTKQEIAEINR		2	1315.7	2	a1.a3 a1.a4	16
a1	pepa1c324	NTKQEIAEINR	1N:0.98	2	1316.68	2	a1.a3 a1.a4	2
a1	pepa1c325	NVEIDPEIQK		2	1184.62	2	a1.a1 a1.b13	8
a1	pepa1c326	NVEIDPEIQK	9Q:0.98	2	1185.6	2	a1.a1 a1.b13	1
a1	pepa1c327	NVEIDPEIQKVK		2	1411.78	1	a1.a1	17
a1	pepa1c328	NVEIDPEIQKVK	1N:0.98	3	1412.76	1	a1.a1	1
a1	pepa1c329	NVEIDPEIQKVKSR		3	1654.91	1	a1.a1	7
a1	pepa1c330	NVIISMDNNR	6M:15.99	2	1191.58	3	a1.a1 a1.a9 a1.b11	3
a1	pepa1c331	NVKVDPEIQNVK		2	1382.76	1	a1.a2	16
a1	pepa1c332	NVKVDPEIQNVKAQER		3	1867	1	a1.a2	1
a1	pepa1c333	NVQDAIADAEQR		2	1329.64	1	a1.a2	12
a1	pepa1c334	NVQDAIADAEQRGEHAIK		3	1964.98	1	a1.a2	9
a1	pepa1c335	PINVEIDPEIQK		2	1394.75	2	a1.a1 a1.b13	1
a1	pepa1c336	QAEISQMQTQISETNVIISMDNNR	20M:15.99	3	2766.3	1	a1.a1	1
a1	pepa1c337	QAEISQMQTQISETNVIISMDNNR	7M:15.99 20M:15.99	3	2782.3	1	a1.a1	1
a1	pepa1c338	QCANIQAAIADAEQR	2C:57.02	2	1658.79	2	a1.a3 a1.a4	3
a1	pepa1c339	QCANIQNAIADAEQR	2C:57.02	2	1701.8	1	a1.a5	2
a1	pepa1c340	QCANIQNAIADAEQRGEIAIK	2C:57.02	3	2313.16	1	a1.a5	1
a1	pepa1c341	QCSNIETAIADAEQR	1Q:-17.03|0.98 2C:57.02	2	1689.74	1	a1.b13	2
a1	pepa1c342	QCSNIETAIADAEQR	1Q:-17.03|0.98 2C:57.02 4N:0.98	2	1690.72	1	a1.b13	1
a1	pepa1c343	QDMACIIK	5C:57.02	2	978.475	1	a1.a7	1
a1	pepa1c344	QDMACIIR	1Q:-17.03 5C:57.02	2	989.454	1	a1.a6	1
a1	pepa1c345	QDMACIIR	1Q:-17.03 3M:15.99 5C:57.02	2	1005.45	1	a1.a6	1
a1	pepa1c346	QDMACIIR	5C:57.02	2	1006.48	1	a1.a6	1
a1	pepa1c347	QDMACIIR	3M:15.99 5C:57.02	2	1022.48	1	a1.a6	1
a1	pepa1c348	QEEKEQIKSINSR	1Q:-17.03	3	1571.8	2	a1.a6 a1.a7	1
a1	pepa1c349	QEIAEINR	1Q:-17.03	2	955.484	2	a1.a3 a1.a4	1
a1	pepa1c350	QFASFIDKVR		3	1210.66	1	a1.a1	2
a1	pepa1c351	QIDPAIQR	4P:15.99	2	956.516	1	a1.a4	1
a1	pepa1c352	QIDPSIQR	1Q:-17.03	2	939.489	1	a1.a5	1
a1	pepa1c353	QIDPSIQR		2	956.516	1	a1.a5	5
a1	pepa1c354	QIDPTIQR	1Q:-17.03	2	953.505	3	a1.a3 a1.a8 a1.b10	2
a1	pepa1c355	QIDPTIQR		2	970.532	3	a1.a3 a1.a8 a1.b10	2
a1	pepa1c356	QIDSIVGER	1Q:-17.03	2	999.511	3	a1.a3 a1.a4 a1.a5	8
a1	pepa1c357	QIDSIVGER		2	1016.54	3	a1.a3 a1.a4 a1.a5	8
a1	pepa1c358	QIDSIVGER	1Q:0.98	2	1017.52	3	a1.a3 a1.a4 a1.a5	1
a1	pepa1c359	QIDSIVGERGR	1Q:0.98	3	1230.64	3	a1.a3 a1.a4 a1.a5	2
a1	pepa1c360	QISETNVIISMDNNR		2	1733.85	1	a1.a1	1
a1	pepa1c361	QISNIQQSISDAEQR	1Q:-17.03	2	1699.82	1	a1.a1	14
a1	pepa1c362	QISNIQQSISDAEQR		2	1716.85	1	a1.a1	31
a1	pepa1c363	QISNIQQSISDAEQR	4N:0.98	2	1717.84	1	a1.a1	17
a1	pepa1c364	QISNIQQSISDAEQRGENAIK	1Q:-17.03	2	2312.15	1	a1.a1	15
a1	pepa1c365	QISNIQQSISDAEQRGENAIK		2	2329.17	1	a1.a1	17
a1	pepa1c366	QISNIQQSISDAEQRGENAIK	18N:0.98	3	2330.16	1	a1.a1	2
a1	pepa1c367	QISNIQQSISDAEQRGENAIKDAK	1Q:-17.03	3	2626.31	1	a1.a1	9
a1	pepa1c368	QISNIQQSISDAEQRGENAIKDAK	1Q:-17.03 18N:0.98	3	2627.29	1	a1.a1	1
a1	pepa1c369	QISNIQQSISDAEQRGENAIKDAK		3	2643.33	1	a1.a1	5
a1	pepa1c370	QISNIQQSISDAEQRGENAIKDAK	18N:0.98	3	2644.32	1	a1.a1	1
a1	pepa1c371	QITSGPSAIGGSITVVAPDSCAPCQPR	1Q:-17.03 21C:57.02 24C:57.02	3	2709.3	1	a1.a7	1
a1	pepa1c372	QITSGPSAIGGSITVVAPDSCAPCQPR	1Q:-17.03 6P:15.99 21C:57.02 24C:57.02	3	2725.29	1	a1.a7	1
a1	pepa1c373	QITSGPSAIGGSITVVAPDSCAPCQPR	21C:57.02 24C:57.02	3	2726.32	1	a1.a7	2
a1	pepa1c374	QITSGPSAIGGSITVVAPDSCAPCQPR	21C:57.02 24C:57.02 25Q:0.98	3	2727.31	1	a1.a7	1
a1	pepa1c375	QITSGPSAIGGSITVVAPDSCAPCQPR	18P:15.99 21C:57.02 24C:57.02	3	2742.32	1	a1.a7	1
a1	pepa1c376	QNIEPIFEQYINNIR		3	1890.97	3	a1.a3 a1.a4 a1.a5	1
a1	pepa1c377	QNIEPIFEQYINNIR	12N:0.98	2	1891.95	3	a1.a3 a1.a4 a1.a5	1
a1	pepa1c378	QNIEPIFEQYINNIRR		2	2047.07	3	a1.a3 a1.a4 a1.a5	5
a1	pepa1c379	QNIEPIFEQYINNIRR	12N:0.98	3	2048.06	3	a1.a3 a1.a4 a1.a5	1
a1	pepa1c380	QPINVEIDPEIQK		2	1522.81	1	a1.a1	1
a1	pepa1c381	QSGSRGGSGGGGSISGGGYGSGGGSGGR		2	2256.99	1	a1.a2	2
a1	pepa1c382	QSGSRGGSGGGGSISGGGYGSGGGSGGR	1Q:0.98	3	2257.98	1	a1.a2	13
a1	pepa1c383	QSGSRGGSGGGGSISGGGYGSGGGSGGRYGSGGGSK		3	2950.3	1	a1.a2	1
a1	pepa1c384	QSIIQPINVEIDPEIQK		2	1964.07	1	a1.a1	6
a1	pepa1c385	QSIIQPINVEIDPEIQKVK		3	2191.23	1	a1.a1	3
a1	pepa1c386	QSKYEEIQITAGR	1Q:-17.03	2	1505.76	1	a1.a1	3
a1	pepa1c387	QSKYEEIQITAGR		2	1522.79	1	a1.a1	5
a1	pepa1c388	QTKWEIIQQVDTSTR		2	1832.95	1	a1.a1	1
a1	pepa1c389	QTKYQEIQITAGR	1Q:-17.03	2	1518.79	1	a1.b11	2
a1	pepa1c390	QTQISETNVIISMDNNR		2	1962.95	1	a1.a1	1
a1	pepa1c391	QTQISETNVIISMDNNR	13M:15.99	2	1978.95	1	a1.a1	2
a1	pepa1c392	QVDIISAEQMR	10M:15.99	2	1305.65	1	a1.b11	1
a1	pepa1c393	RGFSASSARIPGVSR		3	1547.84	1	a1.a4	1
a1	pepa1c394	RGGGGGGYGSGGSSYGSGGGSYGSGGGGGGGR		3	2540.05	1	a1.a1	6
a1	pepa1c395	RICEGVGSVNVCVSSSR	3C:57.02 12C:57.02	3	1865.9	2	a1.a6 a1.a7	1
a1	pepa1c396	RISISTSGGSFR		2	1267.68	1	a1.a5	13
a1	pepa1c397	RIYEEEIR		3	1107.58	2	a1.a6 a1.a7	2
a1	pepa1c398	RQIDSIVGER		2	1172.64	3	a1.a3 a1.a4 a1.a5	9
a1	pepa1c399	RSTSSFSCISR	8C:57.02	3	1287.61	1	a1.a2	7
a1	pepa1c400	RTAAENEFVTIKK		3	1506.83	2	a1.a3 a1.a4	1
a1	pepa1c401	RTIIEGEESR		2	1189.62	1	a1.a1	1
a1	pepa1c402	RTNAENEFVTIK		2	1421.74	1	a1.a1	1
a1	pepa1c403	RTNAENEFVTIKK		3	1549.83	1	a1.a1	10
a1	pepa1c404	RVDQIKSDQSRIDS		3	1646.85	1	a1.a1	2
a1	pepa1c405	RYEDEINKR		3	1222.62	1	a1.b10	1
a1	pepa1c406	SAITPSVSR		2	917.505	2	a1.a5 a1.a8	1
a1	pepa1c407	SANSARIPGVSR		3	1214.66	1	a1.a3	3
a1	pepa1c408	SCISACGPRPGR	2C:57.02 6C:57.02	3	1317.62	1	a1.a6	1
a1	pepa1c409	SDAEQRGENAIKDAK		3	1631.8	1	a1.a1	3
a1	pepa1c410	SDQSRIDSEIK		2	1277.63	1	a1.a1	7
a1	pepa1c411	SETNVIISMDNNR		2	1492.71	1	a1.a1	1
a1	pepa1c412	SETNVIISMDNNR	9M:15.99	2	1508.7	1	a1.a1	1
a1	pepa1c413	SFGAGGGFGSR		2	999.464	1	a1.a1	4
a1	pepa1c414	SFIDKVR		2	864.494	17	a1.a1 a1.a2 a1.a3 a1.a4 a1.a5 a1.a8 a1.a9 a1.b10 a1.b11 a1.b12 a1.b13 a1.b14 a1.b15 a1.b16 a1.b17 a1.b18 a1.b19	1
a1	pepa1c415	SFSTASAITPSVSR		2	1410.72	1	a1.a5	8
a1	pepa1c416	SFSTASAITPSVSRT		2	1511.77	1	a1.a5	1
a1	pepa1c417	SGFSSISVSR		2	1026.52	1	a1.a4	9
a1	pepa1c418	SGFSSVSVSR		2	1012.51	1	a1.a3	10
a1	pepa1c419	SGGGFGGGGFGGGR		2	1126.5	1	a1.a2	9
a1	pepa1c420	SGGGFSSGSAGIINY		2	1373.63	1	a1.a1	1
a1	pepa1c421	SGGGFSSGSAGIINYQR		2	1657.79	1	a1.a1	16
a1	pepa1c422	SGGGFSSGSAGIINYQR	14N:0.98	2	1658.78	1	a1.a1	9
a1	pepa1c423	SGGGFSSGSAGIINYQRR		2	1813.89	1	a1.a1	11
a1	pepa1c424	SGGGFSSGSAGIINYQRR	16Q:0.98	2	1814.88	1	a1.a1	3
a1	pepa1c425	SGGGSRGGGGGGYGSGGSSYGSGGGSYGSGGGGGGGR		3	2885.18	1	a1.a1	4
a1	pepa1c426	SGGGSYGSGGGGGGHGSYGSGSSSGGYR		3	2352.95	1	a1.a1	9
a1	pepa1c427	SGGSRSFSTASAITPSVSR		3	1854.93	1	a1.a5	1
a1	pepa1c428	SGYRSGGGFSSGSAGIIN		2	1673.79	1	a1.a1	1
a1	pepa1c429	SGYRSGGGFSSGSAGIINYQR		3	2121.01	1	a1.a1	3
a1	pepa1c430	SHQFSSQSAFSSMSR	1S:42.01	2	1715.74	1	a1.b11	1
a1	pepa1c431	SICNIGSCGPR	3C:57.02 8C:57.02	2	1220.55	1	a1.a7	2
a1	pepa1c432	SICNIGSCGPR	3C:57.02 4N:0.98 8C:57.02	2	1221.54	1	a1.a7	2
a1	pepa1c433	SIDIDSIIAEVK		2	1302.72	3	a1.a1 a1.a8 a1.b20	28
a1	pepa1c434	SIIQPINVEIDPEIQK		2	1836.01	1	a1.a1	10
a1	pepa1c435	SIIQPINVEIDPEIQKVK		3	2063.17	1	a1.a1	1
a1	pepa1c436	SINNQFASFIDK		2	1383.69	1	a1.a1	16
a1	pepa1c437	SINNQFASFIDK	4N:0.98	2	1384.67	1	a1.a1	17
a1	pepa1c438	SINNQFASFIDKV		2	1482.76	1	a1.a1	2
a1	pepa1c439	SINNQFASFIDKVR		2	1638.86	1	a1.a1	34
a1	pepa1c440	SINNQFASFIDKVR	4N:0.98	2	1639.84	1	a1.a1	2
a1	pepa1c441	SISISVAAGGSR		2	1104.6	2	a1.b12 a1.b14	3
a1	pepa1c442	SISISVAGGGGGFGAAGGFGGR		2	1838.91	1	a1.a2	17
a1	pepa1c443	SISVAGGGGGFGAAGGFGGR		2	1638.8	1	a1.a2	1
a1	pepa1c444	SIVGIGGTKSI		2	1031.61	1	a1.a2	1
a1	pepa1c445	SIVGIGGTKSISIS		2	1318.76	1	a1.a2	1
a1	pepa1c446	SIVNIGGSKS		2	961.531	1	a1.a1	6
a1	pepa1c447	SIVNIGGSKSI		2	1074.62	1	a1.a1	2
a1	pepa1c448	SIVNIGGSKSIS		2	1161.65	1	a1.a1	6
a1	pepa1c449	SIVNIGGSKSISI		2	1274.73	1	a1.a1	1
a1	pepa1c450	SIVNIGGSKSISIS		2	1361.76	1	a1.a1	7
a1	pepa1c451	SIVNIGGSKSISISVA		2	1531.87	1	a1.a1	1
a1	pepa1c452	SIVNIGGSKSISISVAR		2	1687.97	1	a1.a1	12
a1	pepa1c453	SIYGIGGSK		2	881.473	2	a1.a3 a1.a4	1
a1	pepa1c454	SIYGIGGSKR		2	1037.57	2	a1.a3 a1.a4	6
a1	pepa1c455	SIYNIGGSKR		3	1094.6	1	a1.a5	18
a1	pepa1c456	SIYNIGGSKR	4N:0.98	3	1095.58	1	a1.a5	6
a1	pepa1c457	SIYNIGGSR		2	966.5	1	a1.b11	4
a1	pepa1c458	SKAEAEAIYQTK		2	1338.69	2	a1.b12 a1.b14	13
a1	pepa1c459	SKAEAESIYQS		2	1212.57	1	a1.a1	1
a1	pepa1c460	SKAEAESIYQSK		2	1340.67	1	a1.a1	15
a1	pepa1c461	SKAEAESIYQSK	10Q:0.98	2	1341.65	1	a1.a1	6
a1	pepa1c462	SKAEAESIYQSKYEE		3	1761.82	1	a1.a1	3
a1	pepa1c463	SKAEAESIYQSKYEEI		2	1874.9	1	a1.a1	8
a1	pepa1c464	SKAEAESIYQSKYEEIQ		3	2002.96	1	a1.a1	4
a1	pepa1c465	SKAEAESIYQSKYEEIQITAGR		3	2501.25	1	a1.a1	22
a1	pepa1c466	SKCEEMKATVIR	3C:57.02	3	1451.73	2	a1.a6 a1.a7	1
a1	pepa1c467	SKDEAEAIYQTK		2	1382.68	1	a1.b11	9
a1	pepa1c468	SKEEAEAIYHS		3	1263.59	1	a1.a2	1
a1	pepa1c469	SKEEAEAIYHSK		3	1391.68	1	a1.a2	6
a1	pepa1c470	SKIEISEINR		2	1188.66	1	a1.a1	5
a1	pepa1c471	SMQDVVEDYK	2M:15.99	2	1229.54	1	a1.b11	2
a1	pepa1c472	SNVVVGTTNACAPSAR	11C:57.02	2	1603.79	1	a1.a6	2
a1	pepa1c473	SRAEAESWYQTK		2	1455.69	3	a1.a3 a1.a4 a1.b10	10
a1	pepa1c474	SRAEAESWYQTK	8W:15.99	3	1471.68	3	a1.a3 a1.a4 a1.b10	1
a1	pepa1c475	SRDINMDCIIAEIK	8C:57.02	2	1677.83	2	a1.a6 a1.a7	1
a1	pepa1c476	SRDINMDCIIAEIK	6M:15.99 8C:57.02	2	1693.82	2	a1.a6 a1.a7	1
a1	pepa1c477	SRGGGGGGYGSGGSSYGSGGGSYGSGGGGGGGR		3	2627.08	1	a1.a1	5
a1	pepa1c478	SRGSGGIGGACGGAGFGSR	11C:57.02	3	1667.77	2	a1.a3 a1.a4	1
a1	pepa1c479	SRNIDIDSIIAEVK	3N:0.98	2	1573.84	1	a1.a2	1
a1	pepa1c480	SRTEAESWYQTK		2	1485.7	2	a1.a5 a1.a8	7
a1	pepa1c481	SRTEAESWYQTK	8W:15.99	3	1501.69	2	a1.a5 a1.a8	1
a1	pepa1c482	SSGGVGIGGGISVGGSGFSASSGR		2	1996.97	1	a1.a5	1
a1	pepa1c483	SSGSAGIINYQR		2	1252.63	1	a1.a1	4
a1	pepa1c484	SSSSGGVGIGGGISVGGSGFSASSGR		2	2171.03	1	a1.a5	9
a1	pepa1c485	SSYGSGGGSYGSGGGGGGHGSYGSGSSSGGYR		3	2747.09	1	a1.a1	1
a1	pepa1c486	STASAITPSVSR		2	1176.62	1	a1.a5	6
a1	pepa1c487	STSSFSCISR	7C:57.02	2	1131.51	1	a1.a2	5
a1	pepa1c488	SVAGGGGGFGAAGGFGGR		2	1438.68	1	a1.a2	5
a1	pepa1c489	SVNQSIIQPINVK		2	1439.82	1	a1.a2	3
a1	pepa1c490	SVNQSIIQPINVKVDPEIQNVK		3	2462.36	1	a1.a2	6
a1	pepa1c491	SVSVSTSHTTISGGGSR		3	1619.8	1	a1.a1	11
a1	pepa1c492	SVTSSTISSNVASK		2	1367.7	1	a1.a2	1
a1	pepa1c493	SYGSGGGGGGHGSYGSGSSSGGYR		3	2094.85	1	a1.a1	8
a1	pepa1c494	SYGSGGGSYGSGGGGGGHGSYGSGSSSGGYR		3	2660.06	1	a1.a1	2
a1	pepa1c495	SYGSGIGVGGGFSSSSGR		2	1618.75	2	a1.a3 a1.a4	8
a1	pepa1c496	TAAENDFVTIK		2	1208.62	1	a1.a2	5
a1	pepa1c497	TAAENDFVTIK	5N:0.98	2	1209.6	1	a1.a2	5
a1	pepa1c498	TAAENDFVTIKK		2	1336.71	1	a1.a2	17
a1	pepa1c499	TAAENDFVTIKK	5N:0.98	2	1337.69	1	a1.a2	15
a1	pepa1c500	TAAENDFVVIK		2	1206.64	1	a1.b15	4
a1	pepa1c501	TAAENDFVVIKK		2	1334.73	1	a1.b15	10
a1	pepa1c502	TAAENEFVAIKK		3	1320.72	1	a1.b10	1
a1	pepa1c503	TAAENEFVTIK		2	1222.63	2	a1.a3 a1.a4	9
a1	pepa1c504	TAAENEFVTIK	5N:0.98	2	1223.62	2	a1.a3 a1.a4	1
a1	pepa1c505	TAAENEFVTIKK		2	1350.73	2	a1.a3 a1.a4	19
a1	pepa1c506	TAAENEFVTIKK	5N:0.98	2	1351.71	2	a1.a3 a1.a4	1
a1	pepa1c507	TAAENEFVVIK		2	1220.65	2	a1.b13 a1.b18	1
a1	pepa1c508	TAAENEFVVIKK		3	1348.75	2	a1.b13 a1.b18	1
a1	pepa1c509	TDTNVIISMDNNR	9M:15.99	2	1508.7	1	a1.a9	1
a1	pepa1c510	TEAESWYQTK		2	1242.56	2	a1.a5 a1.a8	6
a1	pepa1c511	TEAESWYQTKYEEIQQTAGR		3	2418.12	2	a1.a5 a1.a8	1
a1	pepa1c512	TGGFGSHSVCGGFR	10C:57.02	2	1425.63	1	a1.a6	1
a1	pepa1c513	THNIEPYFES		2	1236.55	1	a1.a1	4
a1	pepa1c514	THNIEPYFESFINN		2	1724.79	1	a1.a1	2
a1	pepa1c515	THNIEPYFESFINNIR		3	1993.98	1	a1.a1	9
a1	pepa1c516	THNIEPYFESFINNIR	13N:0.98	2	1994.96	1	a1.a1	2
a1	pepa1c517	TIIEGEESR		2	1033.52	1	a1.a1	12
a1	pepa1c518	TINNKFASF		2	1041.54	15	a1.a2 a1.a3 a1.a4 a1.a5 a1.a8 a1.a9 a1.b10 a1.b12 a1.b14 a1.b15 a1.b16 a1.b17 a1.b18 a1.b19 a1.b20	1
a1	pepa1c519	TINNKFASFIDK		3	1397.74	15	a1.a2 a1.a3 a1.a4 a1.a5 a1.a8 a1.a9 a1.b10 a1.b12 a1.b14 a1.b15 a1.b16 a1.b17 a1.b18 a1.b19 a1.b20	1
a1	pepa1c520	TINQSIIQPINVEIDPEIQK		3	2292.24	1	a1.a1	11
a1	pepa1c521	TINQSIIQPINVEIDPEIQKVK		3	2519.41	1	a1.a1	11
a1	pepa1c522	TKEEINEINR		2	1245.64	2	a1.a6 a1.a7	2
a1	pepa1c523	TKEEINEINR	6N:0.98	2	1246.63	2	a1.a6 a1.a7	1
a1	pepa1c524	TKWEIIQQVDTSTR		2	1704.89	1	a1.a1	1
a1	pepa1c525	TNAENEFVTIK		2	1265.64	1	a1.a1	9
a1	pepa1c526	TNAENEFVTIK	2N:0.98	2	1266.62	1	a1.a1	9
a1	pepa1c527	TNAENEFVTIKK		2	1393.73	1	a1.a1	24
a1	pepa1c528	TNAENEFVTIKK	2N:0.98	2	1394.72	1	a1.a1	31
a1	pepa1c529	TNAENEFVTIKKDV		3	1607.83	1	a1.a1	5
a1	pepa1c530	TNAENEFVTIKKDVDGAYMTK	19M:15.99	3	2390.15	1	a1.a1	4
a1	pepa1c531	TNVIISMDNNR		2	1276.63	3	a1.a1 a1.a9 a1.b11	4
a1	pepa1c532	TQISETNVIISMDNNR		2	1834.9	1	a1.a1	3
a1	pepa1c533	TQYEEIAQR		2	1137.55	1	a1.b16	4
a1	pepa1c534	TQYEIIAQR		2	1121.59	1	a1.b11	1
a1	pepa1c535	TSFTSVSRSGGGGGGGFGR		3	1730.82	1	a1.a5	1
a1	pepa1c536	TSQNSEINNMQDIVEDYK		2	2127.95	1	a1.a2	2
a1	pepa1c537	TSQNSEINNMQDIVEDYK	10M:15.99	2	2143.94	1	a1.a2	3
a1	pepa1c538	TSQNSEINNMQDIVEDYKK		3	2256.04	1	a1.a2	7
a1	pepa1c539	TSQNSEINNMQDIVEDYKK	10M:15.99	3	2272.04	1	a1.a2	5
a1	pepa1c540	TSQNSEINNMQDIVEDYKK	9N:0.98 10M:15.99	3	2273.02	1	a1.a2	6
a1	pepa1c541	TTAENEFVMIK		2	1282.63	2	a1.a5 a1.a8	5
a1	pepa1c542	TTAENEFVMIK	9M:15.99	2	1298.63	2	a1.a5 a1.a8	1
a1	pepa1c543	TTAENEFVMIKK		3	1410.73	2	a1.a5 a1.a8	4
a1	pepa1c544	TTAENEFVMIKK	9M:15.99	2	1426.72	2	a1.a5 a1.a8	16
a1	pepa1c545	VAGGGGGFGAAGGFGGR		2	1351.65	1	a1.a2	9
a1	pepa1c546	VAPATGDIISTGTR		2	1358.73	1	a1.b19	1
a1	pepa1c547	VDAIMDEINFMK		2	1425.68	2	a1.a5 a1.a8	8
a1	pepa1c548	VDAIMDEINFMK	5M:15.99	2	1441.67	2	a1.a5 a1.a8	4
a1	pepa1c549	VDAIMDEINFMK	5M:15.99 11M:15.99	2	1457.67	2	a1.a5 a1.a8	3
a1	pepa1c550	VDIINQEIEFIK		2	1460.8	1	a1.a2	10
a1	pepa1c551	VDPEIQNVK		2	1041.56	2	a1.a2 a1.a9	4
a1	pepa1c552	VDPEIQNVK	7N:0.98	2	1042.54	2	a1.a2 a1.a9	4
a1	pepa1c553	VDPEIQNVKAQER		3	1525.8	1	a1.a2	5
a1	pepa1c554	VDTITGEVNFIK		2	1335.72	1	a1.b11	8
a1	pepa1c555	VEIDPEIQK		2	1070.57	3	a1.a1 a1.b13 a1.b15	6
a1	pepa1c556	VEIDPEIQK	8Q:0.98	2	1071.56	3	a1.a1 a1.b13 a1.b15	4
a1	pepa1c557	VEIDPEIQKVK		2	1297.74	1	a1.a1	11
a1	pepa1c558	VEIDPEIQKVKSR		3	1540.87	1	a1.a1	4
a1	pepa1c559	VGGVGVPAAPSITAVTVNK		2	1736.99	1	a1.b19	1
a1	pepa1c560	VIDTKWTIIQEQGTK		3	1759.96	2	a1.a4 a1.a5	3
a1	pepa1c561	VIISMDNNR		2	1061.54	4	a1.a1 a1.a9 a1.b11 a1.b13	2
a1	pepa1c562	VIQAHISDTSVIVK		2	1509.86	1	a1.a7	2
a1	pepa1c563	VIQSHISDTSVVVK		2	1511.84	1	a1.a6	2
a1	pepa1c564	VIYDAEISQIHQSVTDTNVIISMDNSR		3	3048.49	1	a1.a2	5
a1	pepa1c565	VIYDAEISQIHQSVTDTNVIISMDNSR	23M:15.99	3	3064.49	1	a1.a2	9
a1	pepa1c566	VKAQYEDIAQK		2	1292.68	1	a1.b12	9
a1	pepa1c567	VKVDPEIQNVK		3	1268.72	2	a1.a2 a1.a9	9
a1	pepa1c568	VNIGGSKSISISVAR		2	1487.85	1	a1.a1	14
a1	pepa1c569	VNIGGSKSISISVAR	2N:0.98	2	1488.84	1	a1.a1	1
a1	pepa1c570	VNQSIIQPINVK		2	1352.79	1	a1.a2	1
a1	pepa1c571	VQIIQTSTNTSHR		3	1484.78	1	a1.b11	1
a1	pepa1c572	VSIAGACGVGGYGSR	7C:57.02	2	1410.68	1	a1.a5	5
a1	pepa1c573	VSSVPSNSNVVVGTTNACAPSAR	18C:57.02	2	2274.11	1	a1.a6	4
a1	pepa1c574	VSSVPSNSNVVVGTTNACAPSAR	16N:0.98 18C:57.02	2	2275.1	1	a1.a6	3
a1	pepa1c575	VSSVPSNSNVVVGTTNACAPSAR	5P:15.99 18C:57.02	3	2290.11	1	a1.a6	3
a1	pepa1c576	VSSVPSNSNVVVGTTNACAPSAR	5P:15.99 7N:0.98 18C:57.02	3	2291.09	1	a1.a6	1
a1	pepa1c577	VSVSTSHTTISGGGSR		3	1532.77	1	a1.a1	9
a1	pepa1c578	VSVSVSTSHTTISGGGSR		3	1718.87	1	a1.a1	6
a1	pepa1c579	VTIKKDVDGAYMTK	12M:15.99	3	1584.83	1	a1.a1	4
a1	pepa1c580	VTSSTISSNVASK		2	1280.67	1	a1.a2	9
a1	pepa1c581	VTVSVTSSTISSNVASK		2	1666.89	1	a1.a2	1
a1	pepa1c582	WEIIQQIDINNSKRS		2	1843.97	1	a1.b13	1
a1	pepa1c583	WEIIQQVDTSTR		2	1475.75	1	a1.a1	13
a1	pepa1c584	WEIIQQVDTSTR	6Q:0.98	2	1476.73	1	a1.a1	3
a1	pepa1c585	WEIIQQVDTSTR	1W:15.99	2	1491.74	1	a1.a1	5
a1	pepa1c586	WEIIQQVDTSTR	1W:15.99 6Q:0.98	2	1492.73	1	a1.a1	2
a1	pepa1c587	WQFYQNQR		2	1169.55	1	a1.a7	1
a1	pepa1c588	WTIIQEQGTK		2	1203.64	3	a1.a3 a1.a4 a1.a5	9
a1	pepa1c589	WTIIQEQGTK	1W:15.99	2	1219.63	3	a1.a3 a1.a4 a1.a5	2
a1	pepa1c590	WTIIQEQKSA		2	1203.64	1	a1.b18	1
a1	pepa1c591	YEEEVAIR		2	1008.5	1	a1.a7	1
a1	pepa1c592	YEEIQITAGR		2	1179.6	1	a1.a1	24
a1	pepa1c593	YEEIQITAGR	5Q:0.98	2	1180.58	1	a1.a1	5
a1	pepa1c594	YEEIQITAGRHGDSVR	5Q:0.98	2	1831.89	1	a1.a1	1
a1	pepa1c595	YEEIQQTAGR		2	1194.57	2	a1.a5 a1.a8	5
a1	pepa1c596	YEEIQQTAGR	6Q:0.98	2	1195.56	2	a1.a5 a1.a8	6
a1	pepa1c597	YEEIQQTAGRHGDDIR	5Q:0.98	3	1888.88	2	a1.a5 a1.a8	1
a1	pepa1c598	YEEIQSIAGK		2	1137.58	1	a1.b17	2
a1	pepa1c599	YEEIQVTAGR		2	1165.58	3	a1.a3 a1.a4 a1.b10	9
a1	pepa1c600	YEEIQVTVGR		2	1193.62	1	a1.a2	8
a1	pepa1c601	YGIGGSKR		2	837.458	2	a1.a3 a1.a4	5
a1	pepa1c602	YGSGGGGGGHGSYGSGSSSGGYR		3	2007.82	1	a1.a1	7
a1	pepa1c603	YGSGGGSKGGSISGGGY		2	1447.64	1	a1.a2	1
a1	pepa1c604	YGSGGGSKGGSISGGGYGSGGGK		2	1890.86	1	a1.a2	11
a1	pepa1c605	YGSGGGSYGSGGGGGGHGSYGSGSSSGGYR		3	2573.03	1	a1.a1	3
a1	pepa1c606	YGVSGGGFSSASNR		2	1345.61	1	a1.b14	2
a1	pepa1c607	YIDGITAER		2	1037.53	1	a1.a2	10
a1	pepa1c608	YNIGGSKR		2	894.479	1	a1.a5	2
a2	pepa2a1	AAPGVDITQIINNMR		2	1612.85	1	a2.a1	5
a2	pepa2a2	AAPGVDITQIINNMR	14M:15.99	2	1628.84	1	a2.a1	5
a2	pepa2a3	ADIEAQVESIKEEIMCIK	15M:15.99 16C:57.02	3	2122.04	1	a2.a9	1
a2	pepa2a4	ADIEMQIESITEEIAYIKK		3	2224.14	1	a2.a1	1
a2	pepa2a5	ADIEMQIESITEEIAYIKK	5M:15.99	3	2240.14	1	a2.a1	1
a2	pepa2a6	AETECQNTEYQQIIDIK	5C:57.02	2	2082.96	1	a2.a1	17
a2	pepa2a7	AETECQNTEYQQIIDIK	5C:57.02 12Q:0.98	2	2083.95	1	a2.a1	2
a2	pepa2a8	AGGDGIIVGSEK		2	1102.57	2	a2.a2 a2.a3	1
a2	pepa2a9	AIEEANADIEVK		2	1301.66	3	a2.a2 a2.a3 a2.a7	12
a2	pepa2b10	AIEEANADIEVK	6N:0.98	2	1302.64	3	a2.a2 a2.a3 a2.a7	2
a2	pepa2b11	AIEEANTEIEVK		2	1345.68	2	a2.a5 a2.a6	8
a2	pepa2b12	AIEEQIQQIR		2	1227.67	1	a2.a1	6
a2	pepa2b13	AIEESNYEIEGK		2	1381.65	1	a2.a1	21
a2	pepa2b14	AIEESNYEIEGK	6N:0.98	2	1382.63	1	a2.a1	2
a2	pepa2b15	AIEIEIQAQHNIR		3	1534.83	1	a2.a4	1
a2	pepa2b16	AIRQSVEADINGIR		2	1541.84	2	a2.a1 a2.a7	1
a2	pepa2b17	AIRQSVEADINGIRR		3	1697.94	2	a2.a1 a2.a7	1
a2	pepa2b18	APGPARDYSQYYR		3	1543.73	1	a2.a5	1
a2	pepa2b19	APSTYGGGISVSS		2	1182.56	2	a2.a2 a2.a3	1
a2	pepa2b20	APSTYGGGISVSSR		2	1338.66	1	a2.a2	13
a2	pepa2b21	APSTYGGGISVSSSR		2	1425.7	1	a2.a3	16
a2	pepa2b22	AQISAIEEQIQQIR		2	1626.88	1	a2.a1	3
a2	pepa2b23	ARIECEINTYR	5C:57.02	2	1424.7	2	a2.a4 a2.a8	3
a2	pepa2b24	ARIECEINTYR	5C:57.02 8N:0.98	2	1425.68	2	a2.a4 a2.a8	2
a2	pepa2b25	ASIEGNIAETENR		2	1403.68	1	a2.a5	9
a2	pepa2b26	ASIENSIEETK		2	1220.6	2	a2.a2 a2.a3	7
a2	pepa2b27	ASIENSIEETK	5N:0.98	2	1221.58	2	a2.a2 a2.a3	2
a2	pepa2b28	ASIENSIEETKGR		2	1433.72	2	a2.a2 a2.a3	18
a2	pepa2b29	ASIENSIEETKGR	5N:0.98	3	1434.71	2	a2.a2 a2.a3	2
a2	pepa2b30	ASYIDKVR		2	951.526	4	a2.a1 a2.a2 a2.a3 a2.a5	1
a2	pepa2b31	CEMEQQNQEYK	1C:-17.03|57.02 3M:15.99	2	1485.56	3	a2.a3 a2.a5 a2.a6	1
a2	pepa2b32	CGPCNSFVR	1C:-17.03|57.02 4C:57.02	2	1079.44	2	a2.a4 a2.a8	1
a2	pepa2b33	CGPCNSFVR	1C:-17.03|57.02 4C:57.02 5N:0.98	2	1080.42	2	a2.a4 a2.a8	2
a2	pepa2b34	CGPCNSFVR	1C:-17.03|57.02 3P:15.99 4C:57.02	2	1095.43	2	a2.a4 a2.a8	1
a2	pepa2b35	CGPCNSFVR	1C:57.02 4C:57.02	2	1096.47	2	a2.a4 a2.a8	2
a2	pepa2b36	CGPCNSFVR	1C:57.02 4C:57.02 5N:0.98	2	1097.45	2	a2.a4 a2.a8	2
a2	pepa2b37	CIISNVEAQISEIRCDIER	1C:57.02 5N:0.98 9Q:0.98 15C:57.02	3	2307.1	1	a2.a9	1
a2	pepa2b38	CIPSISCR	1C:57.02 7C:57.02	2	992.465	1	a2.a4	1
a2	pepa2b39	CNWFCEGSFNGSEK	1C:57.02 5C:57.02	2	1721.67	1	a2.a4	1
a2	pepa2b40	CQIGDRINVEVDAAPTVDINR	1C:-17.03|57.02	2	2338.15	2	a2.a4 a2.a8	2
a2	pepa2b41	CQIGDRINVEVDAAPTVDINR	1C:57.02	2	2355.17	2	a2.a4 a2.a8	1
a2	pepa2b42	DAAPGVDISR		2	1000.51	4	a2.a2 a2.a3 a2.a5 a2.a6	6
a2	pepa2b43	DAEAWFNEK		2	1109.49	1	a2.a1	2
a2	pepa2b44	DAEAWFNEK	5W:15.99	2	1125.48	1	a2.a1	7
a2	pepa2b45	DAEDWFFSK	5W:15.99	2	1160.49	1	a2.a5	1
a2	pepa2b46	DAEEWFHAK		2	1132.51	1	a2.a7	8
a2	pepa2b47	DAETWFISK	5W:15.99	2	1112.53	1	a2.a2	1
a2	pepa2b48	DNAEIENIIR		3	1186.61	1	a2.a4	2
a2	pepa2b49	DNAEIENIIR	7N:0.98	2	1187.59	1	a2.a4	1
a2	pepa2b50	DSIENTITESEAR		2	1464.68	1	a2.a4	5
a2	pepa2b51	DSIENTITESEAR	5N:0.98	2	1465.67	1	a2.a4	1
a2	pepa2b52	DYSKYYK		2	966.457	1	a2.a1	2
a2	pepa2b53	DYSQYYR		2	994.426	1	a2.a5	5
a2	pepa2b54	EISEIRRTMQNIEIEIQSQISMK	1E:-18.01 9M:15.99 11N:0.98	3	2775.4	2	a2.a3 a2.a6	1
a2	pepa2b55	EITTEIDNNIEQISSY		2	1868.88	1	a2.a1	2
a2	pepa2b56	EITTEIDNNIEQISSYK	1E:-18.01	2	1978.96	1	a2.a1	1
a2	pepa2b57	EITTEIDNNIEQISSYK		2	1996.97	1	a2.a1	24
a2	pepa2b58	EITTEIDNNIEQISSYK	8N:0.98	2	1997.95	1	a2.a1	19
a2	pepa2b59	EITTEIDNNIEQISSYKSEITEIRR		3	2981.51	1	a2.a1	1
a2	pepa2b60	EQSIRMSVEADINGIR	1E:-18.01 2Q:0.98 13N:0.98	3	1801.87	1	a2.a6	1
a2	pepa2b61	EQYEAMAER		2	1126.48	1	a2.a7	3
a2	pepa2b62	ETMQFINDR		2	1153.53	3	a2.a4 a2.a8 a2.a9	2
a2	pepa2b63	ETMQFINDR	3M:15.99	2	1169.53	3	a2.a4 a2.a8 a2.a9	1
a2	pepa2b64	EVASNSEIVQSSR		3	1405.69	1	a2.a2	10
a2	pepa2b65	EVASNSEIVQSSR	5N:0.98	2	1406.68	1	a2.a2	2
a2	pepa2b66	EVATNSEIVQSGK		2	1361.69	3	a2.a3 a2.a5 a2.a6	8
a2	pepa2b67	EVATNSEIVQSGK	5N:0.98	2	1362.67	3	a2.a3 a2.a5 a2.a6	8
a2	pepa2b68	EVEQWFTTQTEEINK	1E:-18.01	3	1863.88	1	a2.a4	3
a2	pepa2b69	EVEQWFTTQTEEINK		2	1881.89	1	a2.a4	2
a2	pepa2b70	EVFTSSSSSSSRQTRPIIK	13Q:0.98	3	2098.08	1	a2.a2	1
a2	pepa2b71	EVSTNTAMIQTSK		2	1409.69	1	a2.a7	8
a2	pepa2b72	EVSTNTAMIQTSK	8M:15.99	2	1425.69	1	a2.a7	7
a2	pepa2b73	FGGSSGGYGGIGGFGGGSFR		2	1780.8	1	a2.a1	4
a2	pepa2b74	FSSGGFSGGSFSR		2	1279.57	1	a2.a1	4
a2	pepa2b75	FTSSSSIKGSSGIGGGSSR		3	1758.86	1	a2.a5	6
a2	pepa2b76	FTTQTEEINK		2	1210.6	2	a2.a4 a2.a8	1
a2	pepa2b77	GFSSGGFSGGSFSR		2	1336.59	1	a2.a1	3
a2	pepa2b78	GGFGGDGGIISGNEK		2	1364.64	1	a2.a1	1
a2	pepa2b79	GGFGGGSFR		2	841.395	1	a2.a1	1
a2	pepa2b80	GGFSGGSFSR		2	958.438	1	a2.a1	3
a2	pepa2b81	GGFSSGGFSGGSFSR		2	1393.61	1	a2.a1	6
a2	pepa2b82	GGGFGGDGGIISGNEK		2	1421.67	1	a2.a1	2
a2	pepa2b83	GGGFGGGFAGGDGIIVGSEK		2	1738.84	1	a2.a3	1
a2	pepa2b84	GGGFGGGFGGDGGIISGNEK		2	1739.8	1	a2.a1	1
a2	pepa2b85	GGGFSSGGFSGGSFSR		2	1450.63	1	a2.a1	9
a2	pepa2b86	GGIGGFGGGSFR		2	1068.52	1	a2.a1	1
a2	pepa2b87	GGSSGGYGGIGGFGGGSFR		2	1633.74	1	a2.a1	6
a2	pepa2b88	GGSSSGGYGGGSSGGGGGGYGGGSSGGGSSSGGGYGGGSSSGGHK		3	3444.36	1	a2.a1	2
a2	pepa2b89	GGYGGGSSGGGGGGYGGGSSGGGSSSGGGYGGGSSSGGHK		3	3069.22	1	a2.a1	1
a2	pepa2b90	GICGTAGGISR	3C:57.02	2	1048.52	1	a2.a9	1
a2	pepa2b91	GQTGGDVNVEMDAAPGVDISR		2	2087.97	1	a2.a2	10
a2	pepa2b92	GQTGGDVNVEMDAAPGVDISR	8N:0.98	3	2088.95	1	a2.a2	1
a2	pepa2b93	GQTGGDVNVEMDAAPGVDISR	11M:15.99	2	2103.96	1	a2.a2	14
a2	pepa2b94	GQVGGDVNVEMDAAPGVDISR		2	2085.99	2	a2.a3 a2.a6	12
a2	pepa2b95	GQVGGDVNVEMDAAPGVDISR	2Q:0.98 8N:0.98	3	2087.95	2	a2.a3 a2.a6	1
a2	pepa2b96	GQVGGDVNVEMDAAPGVDISR	11M:15.99	2	2101.98	2	a2.a3 a2.a6	17
a2	pepa2b97	GQVGGDVNVEMDAAPGVDISR	2Q:0.98 8N:0.98 11M:15.99	3	2103.95	2	a2.a3 a2.a6	1
a2	pepa2b98	GQVGGEINVEMDAAPGVDISR		2	2114.02	1	a2.a5	4
a2	pepa2b99	GQVGGEINVEMDAAPGVDISR	11M:15.99	2	2130.01	1	a2.a5	9
a2	pepa2c100	GSCGIGGGIGGGSSR	3C:57.02	2	1278.59	2	a2.a2 a2.a3	8
a2	pepa2c101	GSIGGGFSSGGFSGGSF		2	1464.64	1	a2.a1	2
a2	pepa2c102	GSIGGGFSSGGFSGGSFSR		2	1707.77	1	a2.a1	33
a2	pepa2c103	GSSGGGCFGGSSGGYGGIGGFGGGSFR	7C:57.02	2	2342.98	1	a2.a1	18
a2	pepa2c104	GSSGGYGGIGGFGGGSFR		2	1576.71	1	a2.a1	2
a2	pepa2c105	GSYGSSSFGGSYGGSFGGGSF		2	1908.77	1	a2.a1	1
a2	pepa2c106	GYGGGSSGGGGGGYGGGSSGGGSSSGGGYGGGSSSGGHK		3	3012.2	1	a2.a1	3
a2	pepa2c107	GYGGIGGFGGGSFR		2	1288.61	1	a2.a1	5
a2	pepa2c108	HYSSSRSGGGGGGGGCGGGGGVSSIR	16C:57.02	2	2267	1	a2.a1	2
a2	pepa2c109	IAADDFR		2	807.4	8	a2.a1 a2.a2 a2.a3 a2.a4 a2.a5 a2.a6 a2.a8 a2.a9	6
a2	pepa2c110	IASYIDKVR		2	1064.61	4	a2.a1 a2.a2 a2.a3 a2.a5	20
a2	pepa2c111	IASYIDKVRA		3	1135.65	4	a2.a1 a2.a2 a2.a3 a2.a5	2
a2	pepa2c112	IASYIEKVR		2	1078.63	2	a2.a4 a2.a7	1
a2	pepa2c113	IDNNIEQISSYK		2	1423.71	1	a2.a1	1
a2	pepa2c114	IECEINTYR	3C:57.02	2	1197.56	2	a2.a4 a2.a8	2
a2	pepa2c115	IECEINTYR	3C:57.02 6N:0.98	2	1198.54	2	a2.a4 a2.a8	1
a2	pepa2c116	IEESNYEIEGK		2	1310.61	1	a2.a1	1
a2	pepa2c117	IENEIQTYR		2	1165.58	1	a2.a1	5
a2	pepa2c118	IENEIQTYR	6Q:0.98	2	1166.57	1	a2.a1	3
a2	pepa2c119	IEQEIATYR		2	1122.58	5	a2.a2 a2.a3 a2.a5 a2.a6 a2.a7	9
a2	pepa2c120	IEQEIATYRR		2	1278.68	4	a2.a2 a2.a3 a2.a5 a2.a6	10
a2	pepa2c121	IGFPSSAGSVSPR		2	1261.65	1	a2.a7	1
a2	pepa2c122	IGGFGGGSFR		2	954.479	1	a2.a1	1
a2	pepa2c123	IGGGFSSGGFSGGSFSR		2	1563.72	1	a2.a1	1
a2	pepa2c124	IGSVEEQIAQIR		2	1342.73	4	a2.a2 a2.a3 a2.a5 a2.a6	1
a2	pepa2c125	IIAATIENAQPI		2	1253.71	1	a2.a2	1
a2	pepa2c126	IIAATIENAQPIIQIDNAR		2	2064.14	1	a2.a2	19
a2	pepa2c127	IIAATIENAQPIIQIDNAR	17N:0.98	3	2065.13	1	a2.a2	1
a2	pepa2c128	IIDEITICK	8C:57.02	2	1104.6	3	a2.a4 a2.a8 a2.a9	1
a2	pepa2c129	IIEGEDAHI		2	996.5	4	a2.a2 a2.a3 a2.a5 a2.a6	2
a2	pepa2c130	IIEGEDAHISSQ		2	1298.62	1	a2.a2	1
a2	pepa2c131	IIEGEDAHISSQQASG		2	1641.77	1	a2.a2	1
a2	pepa2c132	IIEGEDAHISSQQASGQ		2	1769.83	1	a2.a2	1
a2	pepa2c133	IIEGEDAHISSQQASGQS		2	1856.86	1	a2.a2	2
a2	pepa2c134	IIEGEDAHISSQQASGQSY		2	2019.93	1	a2.a2	2
a2	pepa2c135	IIEGEDAHISSQQASGQSYS		2	2106.96	1	a2.a2	2
a2	pepa2c136	IIEGEDAHISSQQASGQSYSS		2	2193.99	1	a2.a2	2
a2	pepa2c137	IIEGEDAHISSQQASGQSYSSR		3	2350.09	1	a2.a2	10
a2	pepa2c138	IIEGEDAHISSQQASGQSYSSRE		3	2479.13	1	a2.a2	1
a2	pepa2c139	IIEGEDAHISSS		2	1257.6	2	a2.a3 a2.a6	1
a2	pepa2c140	IIEGEDAHISSSQ		2	1385.65	2	a2.a3 a2.a6	8
a2	pepa2c141	IIEGEDAHISSSQF		2	1532.72	2	a2.a3 a2.a6	1
a2	pepa2c142	IIEGEDAHISSSQFSSGSQSSR		3	2309.06	1	a2.a3	12
a2	pepa2c143	IIEGEDAHISSSQFSSGSQSSR	13Q:0.98	3	2310.05	1	a2.a3	1
a2	pepa2c144	IIEGEDAHISSSQFSSSSQFSSG	13Q:0.98 19Q:0.98	2	2389.03	1	a2.a6	1
a2	pepa2c145	IIEGEDAHITQY		2	1388.67	1	a2.a5	2
a2	pepa2c146	IIEGEDAHITQYK		3	1516.76	1	a2.a5	1
a2	pepa2c147	IIEGEDAHITQYKK		2	1644.86	1	a2.a5	5
a2	pepa2c148	IIIQIDNAR		2	1055.62	2	a2.a1 a2.a5	6
a2	pepa2c149	IINEMRDQYEK		2	1438.7	3	a2.a3 a2.a5 a2.a6	10
a2	pepa2c150	IINEMRDQYEK	5M:15.99	2	1454.69	3	a2.a3 a2.a5 a2.a6	13
a2	pepa2c151	IINEMRDQYEK	5M:15.99 8Q:0.98	3	1455.68	3	a2.a3 a2.a5 a2.a6	1
a2	pepa2c152	IINEMRDQYEKMAEK	12M:15.99	3	1913.91	3	a2.a3 a2.a5 a2.a6	1
a2	pepa2c153	IINEMRDQYEKMAEK	5M:15.99 12M:15.99	3	1929.9	3	a2.a3 a2.a5 a2.a6	5
a2	pepa2c154	IINEMRDQYEQMAEK		2	1897.88	1	a2.a2	7
a2	pepa2c155	IINEMRDQYEQMAEK	12M:15.99	2	1913.87	1	a2.a2	11
a2	pepa2c156	IINEMRDQYEQMAEK	5M:15.99 12M:15.99	2	1929.87	1	a2.a2	11
a2	pepa2c157	IITATIENNR		2	1144.63	1	a2.a7	8
a2	pepa2c158	IITATIENNR	8N:0.98	2	1145.62	1	a2.a7	4
a2	pepa2c159	IITATVDNANIIIQIDNAR		2	2068.14	1	a2.a5	7
a2	pepa2c160	IITATVDNANVIIQIDNAR		2	2054.12	1	a2.a3	13
a2	pepa2c161	IITNVESQIAEIR		2	1485.83	1	a2.a4	2
a2	pepa2c162	IITNVESQIAEIR	8Q:0.98	2	1486.81	1	a2.a4	1
a2	pepa2c163	IKYENEIAIR		2	1248.69	1	a2.a7	11
a2	pepa2c164	IKYENEVAIR		3	1234.68	1	a2.a1	26
a2	pepa2c165	IKYENEVAIR	5N:0.98	3	1235.66	1	a2.a1	13
a2	pepa2c166	INVEVDAAPPVDINK		2	1593.85	1	a2.a9	1
a2	pepa2c167	INVEVDAAPTVDINR		2	1625.85	2	a2.a4 a2.a8	2
a2	pepa2c168	IQSSSASYGGGFGGGSCQIGGGR	17C:57.02	2	2146.96	1	a2.a7	2
a2	pepa2c169	IRDWYQR		2	1036.53	4	a2.a2 a2.a3 a2.a5 a2.a6	2
a2	pepa2c170	IRIENEIQTY		2	1278.67	1	a2.a1	2
a2	pepa2c171	IRIENEIQTYR		2	1434.77	1	a2.a1	23
a2	pepa2c172	IRIENEIQTYR	8Q:0.98	2	1435.75	1	a2.a1	17
a2	pepa2c173	ISSSKGSIGGGFSSGGF		2	1531.74	1	a2.a1	1
a2	pepa2c174	ISSSKGSIGGGFSSGGFSG		2	1675.79	1	a2.a1	2
a2	pepa2c175	ISSSKGSIGGGFSSGGFSGGS		2	1819.85	1	a2.a1	1
a2	pepa2c176	ISSSKGSIGGGFSSGGFSGGSF		2	1966.91	1	a2.a1	3
a2	pepa2c177	ISSSKGSIGGGFSSGGFSGGSFS		2	2053.95	1	a2.a1	2
a2	pepa2c178	ISSSKGSIGGGFSSGGFSGGSFSR		2	2210.05	1	a2.a1	15
a2	pepa2c179	ISSVIAGGSCR	10C:57.02	2	1106.56	2	a2.a2 a2.a3	8
a2	pepa2c180	ISVEADINGIRR		3	1342.74	1	a2.a5	9
a2	pepa2c181	ISVEADINGIRR	8N:0.98	3	1343.73	1	a2.a5	6
a2	pepa2c182	ITMQNINDR		2	1104.55	1	a2.a7	9
a2	pepa2c183	ITMQNINDR	7N:0.98	2	1105.53	1	a2.a7	1
a2	pepa2c184	ITMQNINDRIASYIEK	3M:15.99	3	1924.98	1	a2.a7	1
a2	pepa2c185	ITTDNANIIIQIDNAR		2	1784.95	1	a2.a1	2
a2	pepa2c186	IVVQIDNAK		2	999.583	2	a2.a4 a2.a8	1
a2	pepa2c187	KDAEAWFNEK		2	1237.58	1	a2.a1	7
a2	pepa2c188	KDAEAWFNEK	8N:0.98	3	1238.57	1	a2.a1	1
a2	pepa2c189	KDAEDWFFSK		3	1272.59	1	a2.a5	1
a2	pepa2c190	KDAEEWFFTK		2	1300.62	1	a2.a3	3
a2	pepa2c191	KGSIGGGFSSGGFSGGSFSR		3	1835.87	1	a2.a1	11
a2	pepa2c192	KNHEEEMIAIR		2	1369.69	1	a2.a2	5
a2	pepa2c193	KNHEEEMIAIR	7M:15.99	2	1385.68	1	a2.a2	5
a2	pepa2c194	KNHEEEMKDIR		3	1428.69	1	a2.a1	1
a2	pepa2c195	KYEHEIAIR		3	1158.63	1	a2.a2	1
a2	pepa2c196	KYENEVAIR		2	1121.59	1	a2.a1	1
a2	pepa2c197	MDAAPGVDISR	1M:15.99	2	1147.54	4	a2.a2 a2.a3 a2.a5 a2.a6	1
a2	pepa2c198	MIGFPSSAGSVSPR		2	1392.69	1	a2.a7	5
a2	pepa2c199	MIGFPSSAGSVSPR	1M:15.99	2	1408.69	1	a2.a7	8
a2	pepa2c200	MSVEADINGIR	1M:15.99	2	1220.59	2	a2.a3 a2.a6	5
a2	pepa2c201	MSVEADINGIR	1M:15.99 8N:0.98	2	1221.58	2	a2.a3 a2.a6	1
a2	pepa2c202	MSVEADINGIRR		2	1360.7	2	a2.a3 a2.a6	14
a2	pepa2c203	MSVEADINGIRR	8N:0.98	2	1361.68	2	a2.a3 a2.a6	13
a2	pepa2c204	MSVEADINGIRR	1M:15.99	2	1376.7	2	a2.a3 a2.a6	14
a2	pepa2c205	MSVEADINGIRR	1M:15.99 8N:0.98	2	1377.68	2	a2.a3 a2.a6	20
a2	pepa2c206	NAAPGVDITQIINNMR		2	1726.89	1	a2.a1	1
a2	pepa2c207	NAAPGVDITQIINNMR	15M:15.99	2	1742.89	1	a2.a1	5
a2	pepa2c208	NHEEEMIAIR		2	1241.59	1	a2.a2	6
a2	pepa2c209	NHEEEMIAIR	6M:15.99	3	1257.59	1	a2.a2	8
a2	pepa2c210	NHEEEMIAIR	1N:0.98 6M:15.99	2	1258.57	1	a2.a2	2
a2	pepa2c211	NHEEEMKDIR		3	1300.6	1	a2.a1	6
a2	pepa2c212	NHEEEMKDIR	1N:0.98	3	1301.58	1	a2.a1	1
a2	pepa2c213	NHEEEMNAIR		2	1242.55	2	a2.a3 a2.a5	2
a2	pepa2c214	NHEEEMNAIR	1N:0.98	3	1243.54	2	a2.a3 a2.a5	1
a2	pepa2c215	NIIIQIDNAR		2	1169.66	2	a2.a1 a2.a5	6
a2	pepa2c216	NITTDNANIIIQIDNAR		2	1898.99	1	a2.a1	3
a2	pepa2c217	NNIEQISSYK	1N:0.98	2	1196.58	1	a2.a1	1
a2	pepa2c218	NQEYQVIIDVR		2	1376.72	1	a2.a4	1
a2	pepa2c219	NQIINITTDNANIIIQIDNAR		2	2367.26	1	a2.a1	18
a2	pepa2c220	NQIINITTDNANIIIQIDNAR	19N:0.98	3	2368.25	1	a2.a1	1
a2	pepa2c221	NSIENTITESEAR	1N:0.98	2	1464.68	1	a2.a8	5
a2	pepa2c222	NSIENTITESEAR	1N:0.98 5N:0.98	2	1465.67	1	a2.a8	1
a2	pepa2c223	NVQAIEIEIQSQ		2	1371.71	1	a2.a1	2
a2	pepa2c224	NVQAIEIEIQSQIAIK		2	1797.01	1	a2.a1	26
a2	pepa2c225	NVSTGDVNVEMN	11M:15.99	2	1294.56	1	a2.a1	6
a2	pepa2c226	NVSTGDVNVEMNAAPGVDITQIINNMR	24N:0.98	3	2873.38	1	a2.a1	1
a2	pepa2c227	NVSTGDVNVEMNAAPGVDITQIINNMR	11M:15.99	3	2888.39	1	a2.a1	18
a2	pepa2c228	NVSTGDVNVEMNAAPGVDITQIINNMR	11M:15.99 24N:0.98	3	2889.37	1	a2.a1	1
a2	pepa2c229	NVSTGDVNVEMNAAPGVDITQIINNMR	11M:15.99 26M:15.99	3	2904.38	1	a2.a1	9
a2	pepa2c230	NVSTGDVNVEMNAAPGVDITQIINNMR	11M:15.99 21Q:0.98 26M:15.99	3	2905.37	1	a2.a1	8
a2	pepa2c231	NVSTGDVNVEMNAAPGVDITQIINNMR	11M:15.99 15P:15.99 26M:15.99	3	2920.38	1	a2.a1	3
a2	pepa2c232	PCTSCVPPAPCTPCAPRPR	2C:57.02 5C:57.02 11C:57.02 14C:57.02	3	2180.98	1	a2.a4	1
a2	pepa2c233	PIGPCISNPCTSCVPPAPCTPCAPRPR	5C:57.02 10C:57.02 13C:57.02 19C:57.02 22C:57.02	3	3019.38	1	a2.a4	1
a2	pepa2c234	PYNFCIPSISCR	5C:57.02 11C:57.02	2	1513.69	1	a2.a4	2
a2	pepa2c235	QAPGPARDYSQYYR		3	1671.79	1	a2.a5	2
a2	pepa2c236	QFSSGSQSSRDVTSSSR		3	1802.83	1	a2.a3	2
a2	pepa2c237	QFTSSSSIK	1Q:-17.03	2	967.473	1	a2.a5	1
a2	pepa2c238	QFTSSSSIKGSSGIGGGSSR	1Q:-17.03	2	1869.89	1	a2.a5	4
a2	pepa2c239	QFTSSSSIKGSSGIGGGSSR		3	1886.92	1	a2.a5	5
a2	pepa2c240	QIERDNAEIENIIR	1Q:-17.03	2	1695.87	1	a2.a4	1
a2	pepa2c241	QIERDNAEIENIIR		2	1712.89	1	a2.a4	2
a2	pepa2c242	QISAIEEQIQQIR		2	1555.84	1	a2.a1	1
a2	pepa2c243	QISSYKSEITEIRR	1Q:-17.03	3	1692.89	1	a2.a1	4
a2	pepa2c244	QIVEADINGIR	1Q:-17.03 8N:0.98	2	1211.63	1	a2.a9	1
a2	pepa2c245	QIVEADINGIR		2	1227.67	1	a2.a9	2
a2	pepa2c246	QIVEADINGIR	8N:0.98	2	1228.65	1	a2.a9	1
a2	pepa2c247	QIVEADINGIRR	1Q:-17.03	2	1366.74	1	a2.a9	1
a2	pepa2c248	QIVEADINGIRR	1Q:-17.03 8N:0.98	2	1367.73	1	a2.a9	2
a2	pepa2c249	QIVEADINGIRR		2	1383.77	1	a2.a9	2
a2	pepa2c250	QIVEADINGIRR	8N:0.98	2	1384.75	1	a2.a9	3
a2	pepa2c251	QIVESDINGIR	8N:0.98	2	1244.65	1	a2.a8	1
a2	pepa2c252	QIVESDINGIRR	1Q:-17.03	2	1382.74	1	a2.a8	1
a2	pepa2c253	QIVESDINGIRR	1Q:-17.03 8N:0.98	2	1383.72	1	a2.a8	1
a2	pepa2c254	QIVESDINGIRR		2	1399.77	1	a2.a8	4
a2	pepa2c255	QIVESDINGIRR	8N:0.98	3	1400.75	1	a2.a8	2
a2	pepa2c256	QNQEYQVIIDVK	1Q:-17.03	2	1459.74	2	a2.a8 a2.a9	1
a2	pepa2c257	QNQEYQVIIDVK		2	1476.77	2	a2.a8 a2.a9	1
a2	pepa2c258	QNQEYQVIIDVR	1Q:-17.03	2	1487.75	1	a2.a4	1
a2	pepa2c259	QNQEYQVIIDVR	1Q:-17.03 3Q:0.98	2	1488.73	1	a2.a4	1
a2	pepa2c260	QNQEYQVIIDVR		3	1504.78	1	a2.a4	2
a2	pepa2c261	QNQEYQVIIDVR	3Q:0.98	2	1505.76	1	a2.a4	2
a2	pepa2c262	QRPAEIKDYSPYFK	1Q:-17.03	3	1724.86	1	a2.a3	8
a2	pepa2c263	QRPAEIKDYSPYFK		3	1741.89	1	a2.a3	2
a2	pepa2c264	QRPSEIKDYSPY	1Q:-17.03	2	1465.7	1	a2.a2	2
a2	pepa2c265	QRPSEIKDYSPY		2	1482.72	1	a2.a2	2
a2	pepa2c266	QRPSEIKDYSPYFK	1Q:-17.03	2	1740.86	1	a2.a2	6
a2	pepa2c267	QRPSEIKDYSPYFK		2	1757.89	1	a2.a2	5
a2	pepa2c268	QSIEASIAETEGR	1Q:-17.03	2	1373.65	1	a2.a1	9
a2	pepa2c269	QSIEASIAETEGR		2	1390.68	1	a2.a1	29
a2	pepa2c270	QSIEASIAETEGR	1Q:0.98	2	1391.66	1	a2.a1	3
a2	pepa2c271	QSPASPERDYSPYYK	1Q:-17.03	2	1770.8	1	a2.a7	1
a2	pepa2c272	QSPASPERDYSPYYK		3	1787.82	1	a2.a7	2
a2	pepa2c273	QSVEADINGIR	1Q:-17.03	2	1184.59	2	a2.a1 a2.a7	8
a2	pepa2c274	QSVEADINGIR	1Q:-17.03 8N:0.98	2	1185.57	2	a2.a1 a2.a7	7
a2	pepa2c275	QSVEADINGIR		2	1201.62	2	a2.a1 a2.a7	13
a2	pepa2c276	QSVEADINGIR	8N:0.98	2	1202.6	2	a2.a1 a2.a7	13
a2	pepa2c277	QSVEADINGIRR	1Q:-17.03	2	1340.69	2	a2.a1 a2.a7	5
a2	pepa2c278	QSVEADINGIRR	1Q:-17.03 8N:0.98	2	1341.68	2	a2.a1 a2.a7	21
a2	pepa2c279	QSVEADINGIRR		2	1357.72	2	a2.a1 a2.a7	15
a2	pepa2c280	QSVEADINGIRR	8N:0.98	2	1358.7	2	a2.a1 a2.a7	21
a2	pepa2c281	QSVEADINGIRR	1Q:0.98 8N:0.98	2	1359.69	2	a2.a1 a2.a7	4
a2	pepa2c282	QTRPIIKEQSSSSFSQGQ		3	2008.01	1	a2.a2	1
a2	pepa2c283	QTRPIIKEQSSSSFSQGQS		3	2095.04	1	a2.a2	6
a2	pepa2c284	QTRPIIKEQSSSSFSQGQSS		3	2182.07	1	a2.a2	9
a2	pepa2c285	QTVEADVNGIR	1Q:-17.03	2	1184.59	1	a2.a2	1
a2	pepa2c286	QTVEADVNGIR		2	1201.62	1	a2.a2	5
a2	pepa2c287	QTVEADVNGIR	8N:0.98	2	1202.6	1	a2.a2	1
a2	pepa2c288	QTVEADVNGIRR	1Q:-17.03	2	1340.69	1	a2.a2	1
a2	pepa2c289	QTVEADVNGIRR	1Q:-17.03 8N:0.98	2	1341.68	1	a2.a2	4
a2	pepa2c290	QTVEADVNGIRR		2	1357.72	1	a2.a2	15
a2	pepa2c291	QTVEADVNGIRR	8N:0.98	2	1358.7	1	a2.a2	12
a2	pepa2c292	QVGGEINVEMDAAPGVDISR	1Q:-17.03 10M:15.99	2	2055.97	1	a2.a5	1
a2	pepa2c293	QVVSSSEQIQSCQAEIIEIR	12C:57.02	2	2304.15	1	a2.a8	2
a2	pepa2c294	QVVSSSEQIQSCQAEIIEIRR	1Q:-17.03 12C:57.02	3	2443.22	1	a2.a8	2
a2	pepa2c295	QVVSSSEQIQSCQAEIIEIRR	12C:57.02	3	2460.25	1	a2.a8	1
a2	pepa2c296	QVVSSSEQIQSYQAEIIEIR	1Q:-17.03	3	2290.16	1	a2.a4	1
a2	pepa2c297	QVVSSSEQIQSYQAEIIEIR		2	2307.18	1	a2.a4	2
a2	pepa2c298	QVVSSSEQIQSYQAEIIEIRR	1Q:-17.03	2	2446.26	1	a2.a4	1
a2	pepa2c299	QVVSSSEQIQSYQAEIIEIRR		3	2463.28	1	a2.a4	1
a2	pepa2c300	REVEQWFTTQTEEINK		3	2037.99	1	a2.a4	1
a2	pepa2c301	RIIDEITICK	9C:57.02	2	1260.7	3	a2.a4 a2.a8 a2.a9	2
a2	pepa2c302	RIIEGEDAHISSQQASGQ		3	1925.93	1	a2.a2	1
a2	pepa2c303	RIIEGEDAHISSQQASGQS		3	2012.96	1	a2.a2	1
a2	pepa2c304	RIIEGEDAHISSQQASGQSYS		3	2263.06	1	a2.a2	1
a2	pepa2c305	RIIEGEDAHISSQQASGQSYSSR		3	2506.19	1	a2.a2	1
a2	pepa2c306	RIIEGEDAHISSSQFSSGSQSSR		3	2465.17	1	a2.a3	3
a2	pepa2c307	RIIEGEDAHITQYK		2	1672.87	1	a2.a5	3
a2	pepa2c308	RIKYENEVAIR		3	1390.78	1	a2.a1	3
a2	pepa2c309	RMSVEADINGIR	2M:15.99	3	1376.7	2	a2.a3 a2.a6	1
a2	pepa2c310	RNVQAIEIEIQSQIAIK		3	1953.11	1	a2.a1	1
a2	pepa2c311	RQSVEADINGIR		2	1357.72	2	a2.a1 a2.a7	13
a2	pepa2c312	RQSVEADINGIR	9N:0.98	3	1358.7	2	a2.a1 a2.a7	1
a2	pepa2c313	RQSVEADINGIRR		3	1513.82	2	a2.a1 a2.a7	2
a2	pepa2c314	RQTVEADVNGIR		3	1357.72	1	a2.a2	1
a2	pepa2c315	RSQYEQIAEQNRK		3	1649.84	1	a2.a1	4
a2	pepa2c316	RTVNAIEIEIQAQHNIR		3	2005.09	1	a2.a4	1
a2	pepa2c317	RVIDEITIAR		2	1185.69	4	a2.a2 a2.a3 a2.a5 a2.a6	14
a2	pepa2c318	RVIDEITITK		2	1187.7	1	a2.a1	15
a2	pepa2c319	SAEINKEVSTNTAMIQTSK		3	2052.03	1	a2.a7	5
a2	pepa2c320	SAEINKEVSTNTAMIQTSK	14M:15.99	3	2068.02	1	a2.a7	6
a2	pepa2c321	SCGIGGGIGGGSSR	2C:57.02	2	1221.56	2	a2.a2 a2.a3	1
a2	pepa2c322	SDIEAQVESIKEEIICIK	16C:57.02	3	2104.08	2	a2.a4 a2.a8	1
a2	pepa2c323	SDIERQNQEYQVIIDVR	6Q:0.98	3	2106.05	1	a2.a4	1
a2	pepa2c324	SEITEIRR		2	1003.55	1	a2.a1	7
a2	pepa2c325	SGGYGGGSSGGGGGGYGGGSSGGGSSSGGGYGGGSSSGGHK		3	3156.25	1	a2.a1	3
a2	pepa2c326	SGGYGGIGGFGGGSFR		2	1432.66	1	a2.a1	4
a2	pepa2c327	SIGGGFSSGGFSGGSFSR		2	1650.75	1	a2.a1	8
a2	pepa2c328	SIIEGEGSSGGGGR		2	1262.6	1	a2.a1	9
a2	pepa2c329	SIIESEDCNIPSNPCATTNAC	8C:57.02 15C:57.02 21C:57.02	3	2352.97	1	a2.a4	1
a2	pepa2c330	SIIESEDCNIPSNPCATTNACSK	8C:57.02 15C:57.02 21C:57.02	3	2568.1	1	a2.a4	1
a2	pepa2c331	SIIESEDCNIPSNPCATTNACSK	8C:57.02 11P:15.99 15C:57.02 21C:57.02	3	2584.1	1	a2.a4	1
a2	pepa2c332	SKEITTEIDNNIEQISS		2	1920.94	1	a2.a1	2
a2	pepa2c333	SKEITTEIDNNIEQISSY		2	2084	1	a2.a1	6
a2	pepa2c334	SKEITTEIDNNIEQISSYK		2	2212.1	1	a2.a1	11
a2	pepa2c335	SKEITTEIDNNIEQISSYK	10N:0.98	2	2213.08	1	a2.a1	20
a2	pepa2c336	SKGSIGGGFSSGGFSGGSFSR		2	1922.9	1	a2.a1	8
a2	pepa2c337	SQYEAIVETNR		2	1309.64	1	a2.a4	1
a2	pepa2c338	SQYEAIVETNR	2Q:0.98	2	1310.62	1	a2.a4	1
a2	pepa2c339	SQYEAIVETNRR		2	1465.74	1	a2.a4	5
a2	pepa2c340	SQYEAIVETNRR	2Q:0.98	2	1466.72	1	a2.a4	2
a2	pepa2c341	SQYEQIAEQNR		2	1365.64	1	a2.a1	14
a2	pepa2c342	SQYEQIAEQNR	9Q:0.98	2	1366.62	1	a2.a1	8
a2	pepa2c343	SQYEQIAEQNRK		2	1493.73	1	a2.a1	18
a2	pepa2c344	SQYEQIAEQNRK	10N:0.98	2	1494.72	1	a2.a1	12
a2	pepa2c345	SQYEQIAEQNRK	2Q:0.98 5Q:0.98	3	1495.7	1	a2.a1	4
a2	pepa2c346	SQYEQIAEQNRKDA		3	1679.8	1	a2.a1	1
a2	pepa2c347	SQYEQIAEQNRKDAEAWFNEK		3	2584.21	1	a2.a1	2
a2	pepa2c348	SSGGFSGGSFSR		2	1132.5	1	a2.a1	8
a2	pepa2c349	SSGGYGGGSSGGGGGGYGGGSSGGGSSSGGGYGGGSSSGGHK		3	3243.28	1	a2.a1	2
a2	pepa2c350	SSGGYGGIGGFGGGSFR		2	1519.69	1	a2.a1	5
a2	pepa2c351	SSKGSIGGGFSSGGFSGGSFSR		2	2009.93	1	a2.a1	7
a2	pepa2c352	SSQFSSGSQSSRDVTSSSR		3	1976.89	1	a2.a3	7
a2	pepa2c353	SSSGGYGGGSSGGGGGGYGGGSSGGGSSSGGGYGGGSSSGGHK		3	3330.31	1	a2.a1	3
a2	pepa2c354	SSSKGSIGGGFSSGGFSGGSFSR		3	2096.96	1	a2.a1	17
a2	pepa2c355	STSVTTTSSASVTTTSNASGR		2	2002.95	1	a2.a7	10
a2	pepa2c356	STSVTTTSSASVTTTSNASGRR		3	2159.05	1	a2.a7	8
a2	pepa2c357	STSVTTTSSASVTTTSNASGRR	17N:0.98	3	2160.04	1	a2.a7	1
a2	pepa2c358	STYGGGISVSSR		2	1170.57	1	a2.a2	1
a2	pepa2c359	STYGGGISVSSSR		2	1257.61	1	a2.a3	1
a2	pepa2c360	SVEADINGIRR		2	1229.66	5	a2.a1 a2.a3 a2.a5 a2.a6 a2.a7	7
a2	pepa2c361	SYIDKVR		2	880.489	4	a2.a1 a2.a2 a2.a3 a2.a5	3
a2	pepa2c362	SYSSREVFTSSSSSSSR		3	1840.83	1	a2.a2	1
a2	pepa2c363	TCSRQFTSSSSMKGSCGIGGGIGGGSSR	1T:42.01 2C:57.02 5Q:0.98 16C:57.02	3	2809.23	2	a2.a2 a2.a3	2
a2	pepa2c364	TCSRQFTSSSSMKGSCGIGGGIGGGSSR	1T:42.01 2C:57.02 5Q:0.98 12M:15.99 16C:57.02	3	2825.22	2	a2.a2 a2.a3	2
a2	pepa2c365	TDIEMQIEGIK	5M:15.99	2	1292.64	1	a2.a2	1
a2	pepa2c366	TDIEMQIEGIKEEIAYIR	5M:15.99	3	2167.1	1	a2.a2	1
a2	pepa2c367	TEEINKEVASNSEIVQSSR		2	2120.05	1	a2.a2	13
a2	pepa2c368	TEEINKEVASNSEIVQSSR	11N:0.98	2	2121.03	1	a2.a2	7
a2	pepa2c369	TEEINREVATNSEIVQSGK		2	2104.05	3	a2.a3 a2.a5 a2.a6	6
a2	pepa2c370	TEEINREVATNSEIVQSGK	5N:0.98	3	2105.04	3	a2.a3 a2.a5 a2.a6	1
a2	pepa2c371	TEITEIRR		2	1017.57	1	a2.a7	4
a2	pepa2c372	TIDDIKNQII		2	1172.65	1	a2.a1	1
a2	pepa2c373	TIDDIKNQIIN		2	1286.7	1	a2.a1	6
a2	pepa2c374	TIDDIKNQIINITTDNA		2	1901.98	1	a2.a1	1
a2	pepa2c375	TIDDIKNQIINITTDNAN		2	2016.02	1	a2.a1	1
a2	pepa2c376	TIEDIRNKIIAATIENAQPIIQIDNAR	16N:0.98 18Q:0.98 19P:15.99	3	3051.63	1	a2.a2	1
a2	pepa2c377	TIEEIQQKIICTK	11C:57.02	3	1603.87	1	a2.a4	1
a2	pepa2c378	TIENAQPIIQIDNAR		2	1695.9	1	a2.a2	1
a2	pepa2c379	TIQGIEIEIQSQISMK	15M:15.99	2	1833.96	1	a2.a7	1
a2	pepa2c380	TIVEEVQDGK		2	1117.57	1	a2.a5	7
a2	pepa2c381	TIVEEVQDGKVISSR		2	1659.89	1	a2.a5	14
a2	pepa2c382	TKFETEQAIR		3	1222.64	1	a2.a5	15
a2	pepa2c383	TKVMDVHDGKVVSTHEQ		3	1909.94	2	a2.a3 a2.a6	1
a2	pepa2c384	TKYEHEIAIR		2	1259.67	1	a2.a2	9
a2	pepa2c385	TKYETEINIR		3	1266.67	1	a2.a3	15
a2	pepa2c386	TKYETEISIR		3	1239.66	1	a2.a9	2
a2	pepa2c387	TKYQTEISIR		3	1238.67	1	a2.a4	2
a2	pepa2c388	TMQAIEIEIQSQISMK		3	1849.94	1	a2.a5	1
a2	pepa2c389	TMQAIEIEIQSQISMK	15M:15.99	2	1865.93	1	a2.a5	6
a2	pepa2c390	TMQAIEIEIQSQISMK	2M:15.99 15M:15.99	2	1881.93	1	a2.a5	5
a2	pepa2c391	TMQNIEIEIQSQISMK		2	1892.95	2	a2.a3 a2.a6	4
a2	pepa2c392	TMQNIEIEIQSQISMK	2M:15.99	2	1908.94	2	a2.a3 a2.a6	17
a2	pepa2c393	TMQNIEIEIQSQISMK	2M:15.99 15M:15.99	2	1924.94	2	a2.a3 a2.a6	16
a2	pepa2c394	TRIEQEIATY		2	1223.63	5	a2.a2 a2.a3 a2.a5 a2.a6 a2.a7	2
a2	pepa2c395	TRIEQEIATYR		2	1379.73	5	a2.a2 a2.a3 a2.a5 a2.a6 a2.a7	17
a2	pepa2c396	TRIEQEIATYR	5Q:0.98	2	1380.71	5	a2.a2 a2.a3 a2.a5 a2.a6 a2.a7	1
a2	pepa2c397	TRIEQEIATYRR		3	1535.83	4	a2.a2 a2.a3 a2.a5 a2.a6	1
a2	pepa2c398	TSCSSRPCVPPSCHSC	3C:57.02 8C:57.02 13C:57.02 16C:57.02	3	1878.73	1	a2.a4	1
a2	pepa2c399	TSCVPPAPCTPCAPRPR	3C:57.02 9C:57.02 12C:57.02	3	1923.9	1	a2.a4	1
a2	pepa2c400	TTDNANIIIQIDNAR		2	1671.87	1	a2.a1	4
a2	pepa2c401	TTEIDNNIEQISSYK		2	1754.84	1	a2.a1	1
a2	pepa2c402	TTSIRQFTSSSSIK	1T:42.01	2	1584.82	1	a2.a5	1
a2	pepa2c403	TTSIRQFTSSSSIKGSSGIGGGSSR	1T:42.01	3	2487.24	1	a2.a5	2
a2	pepa2c404	TVDNANIIIQIDNAR	4N:0.98 6N:0.98	3	1671.85	1	a2.a5	1
a2	pepa2c405	TVEADVNGIRR		2	1229.66	1	a2.a2	2
a2	pepa2c406	TVNAIEIEIQAQHNIR		2	1848.99	1	a2.a4	7
a2	pepa2c407	TVNAIEIEIQAQHNIR	3N:0.98	2	1849.98	1	a2.a4	3
a2	pepa2c408	TVNAIEIEIQAQHSMR		3	1839.94	1	a2.a9	2
a2	pepa2c409	TVNAIEIEIQAQHSMR	15M:15.99	2	1855.93	1	a2.a9	2
a2	pepa2c410	VEADINGIRR		2	1142.63	6	a2.a1 a2.a3 a2.a5 a2.a6 a2.a7 a2.a9	2
a2	pepa2c411	VIAEMREQYEAMAER		3	1825.86	1	a2.a7	3
a2	pepa2c412	VIAEMREQYEAMAER	5M:15.99	3	1841.85	1	a2.a7	8
a2	pepa2c413	VIAEMREQYEAMAER	5M:15.99 12M:15.99	3	1857.85	1	a2.a7	2
a2	pepa2c414	VIDEITIAR		2	1029.59	4	a2.a2 a2.a3 a2.a5 a2.a6	4
a2	pepa2c415	VIDEITITK		2	1031.6	1	a2.a1	6
a2	pepa2c416	VIDEITITKA		2	1102.64	1	a2.a1	3
a2	pepa2c417	VIIEIDNAR		2	1042.59	1	a2.a7	6
a2	pepa2c418	VIIEIDNAR	7N:0.98	2	1043.57	1	a2.a7	1
a2	pepa2c419	VIQGIEIEIQSQISMK		2	1815.99	1	a2.a2	2
a2	pepa2c420	VIQGIEIEIQSQISMK	15M:15.99	2	1831.98	1	a2.a2	1
a2	pepa2c421	VMDVHDGKVVSTHE		3	1552.74	2	a2.a3 a2.a6	5
a2	pepa2c422	VMDVHDGKVVSTHE	2M:15.99	3	1568.74	2	a2.a3 a2.a6	7
a2	pepa2c423	VMDVHDGKVVSTHEQ		3	1680.8	2	a2.a3 a2.a6	4
a2	pepa2c424	VMDVHDGKVVSTHEQ	2M:15.99	3	1696.8	2	a2.a3 a2.a6	4
a2	pepa2c425	VMDVHDGKVVSTHEQVIR	2M:15.99	3	2065.05	2	a2.a3 a2.a6	2
a2	pepa2c426	VPSIAGAAGYISSAR		2	1419.76	1	a2.a9	1
a2	pepa2c427	VTMQNINDR		2	1090.53	4	a2.a1 a2.a2 a2.a3 a2.a6	10
a2	pepa2c428	VTMQNINDR	7N:0.98	2	1091.51	4	a2.a1 a2.a2 a2.a3 a2.a6	15
a2	pepa2c429	VTMQNINDR	3M:15.99	2	1106.53	4	a2.a1 a2.a2 a2.a3 a2.a6	54
a2	pepa2c430	VTMQNINDRIASY	3M:15.99	2	1540.74	3	a2.a1 a2.a2 a2.a3	1
a2	pepa2c431	VTMQNINDRIASYIDK	3M:15.99	3	1896.95	3	a2.a1 a2.a2 a2.a3	2
a2	pepa2c432	VTMQNINDRIASYIDKVR	3M:15.99	3	2152.12	3	a2.a1 a2.a2 a2.a3	1
a2	pepa2c433	VVSTHEQVIR		2	1167.65	2	a2.a3 a2.a6	7
a2	pepa2c434	VVSTHEQVIR	7Q:0.98	3	1168.63	2	a2.a3 a2.a6	1
a2	pepa2c435	YEAIVETNRR		2	1250.65	1	a2.a4	1
a2	pepa2c436	YENEIAIR		2	1007.52	1	a2.a7	2
a2	pepa2c437	YENEVAIR		2	993.5	1	a2.a1	2
a2	pepa2c438	YENEVAIR	3N:0.98	2	994.484	1	a2.a1	4
a2	pepa2c439	YEQIAEQNR		2	1150.55	1	a2.a1	1
a2	pepa2c440	YETEINIR		2	1037.53	1	a2.a3	3
a2	pepa2c441	YGGGSSGGGGGGYGGGSSGGGSSSGGGYGGGSSSGGHK		3	2955.18	1	a2.a1	6
a2	pepa2c442	YGGIGGFGGGSFR		2	1231.59	1	a2.a1	3
a2	pepa2c443	YKSEITEIRR		3	1294.71	1	a2.a1	4
a2	pepa2c444	YNFCIPSISCR	4C:57.02 10C:57.02	2	1416.64	1	a2.a4	1
a2	pepa2c445	YQTEISIR		2	1009.53	1	a2.a4	1
a3	pepa3a1	AAIEKSIEDTKNR		3	1474.79	1	a3.a1	3
a3	pepa3a2	ANEKSTMQEINSR		3	1507.72	1	a3.a1	3
a3	pepa3a3	DIENQYETQITQIEHEVSSSGQEVQSSAK		3	3264.51	1	a3.a1	11
a3	pepa3a4	DIENQYETQITQIEHEVSSSGQEVQSSAK	12Q:0.98	3	3265.5	1	a3.a1	4
a3	pepa3a5	DQIVDITVGNNK		2	1315.69	1	a3.a1	1
a3	pepa3a6	DVNVEINVAPGKDITK		3	1711.92	1	a3.a1	2
a3	pepa3a7	EEMSQITGQNSGDVNVEINVAPGK	3M:15.99	3	2532.19	1	a3.a1	1
a3	pepa3a8	EIETYHNIIEGGQED		2	1746.78	1	a3.a1	1
a3	pepa3a9	EIETYHNIIEGGQEDFESSGAGK		3	2510.13	1	a3.a1	20
a3	pepa3b10	EIETYHNIIEGGQEDFESSGAGK	7N:0.98	3	2511.12	1	a3.a1	7
a3	pepa3b11	ESGGSYGGGEEASGSGGGYGGGSGK		2	2107.84	1	a3.a1	4
a3	pepa3b12	ESGGSYGGGEEASGSGGGYGGGSGKSSHS		3	2506	1	a3.a1	1
a3	pepa3b13	FEMEQNIR		2	1066.5	1	a3.a1	6
a3	pepa3b14	FEMEQNIR	3M:15.99	2	1082.49	1	a3.a1	5
a3	pepa3b15	FSASSIGGGFGGGSR		2	1343.63	1	a3.a1	1
a3	pepa3b16	FSSSSGYGGGSSR		2	1235.53	1	a3.a1	4
a3	pepa3b17	FSSSSGYGGGSSRV		2	1334.6	1	a3.a1	1
a3	pepa3b18	GESGGSYGGGEEASGSGGGYGGGSGK		2	2164.86	1	a3.a1	5
a3	pepa3b19	GESGGSYGGGEEASGSGGGYGGGSGKSSHS		3	2563.02	1	a3.a1	7
a3	pepa3b20	GFSASSIGGGFGGGSR		2	1400.66	1	a3.a1	2
a3	pepa3b21	GGAGGGDGGIITANEK		2	1373.67	1	a3.a1	2
a3	pepa3b22	GGESGGSYGGGEEASGSGGGYGGGSGK		3	2221.89	1	a3.a1	4
a3	pepa3b23	GGESGGSYGGGEEASGSGGGYGGGSGKSSHS		3	2620.04	1	a3.a1	5
a3	pepa3b24	GGFGGGAGGGDGGIITANEK		2	1691.8	1	a3.a1	6
a3	pepa3b25	GGGAGGGDGGIITANEK		2	1430.69	1	a3.a1	1
a3	pepa3b26	GGGGGGGIGSGGSIRSSYSR		3	1725.83	1	a3.a1	4
a3	pepa3b27	GGGGSFGYSYGGGSGGGFSAS		2	1772.71	1	a3.a1	3
a3	pepa3b28	GGGGSFGYSYGGGSGGGFSASSIGGGFGGGSR		2	2705.16	1	a3.a1	18
a3	pepa3b29	GGGSGGGFSASSIGGGFGGGSR		2	1772.79	1	a3.a1	8
a3	pepa3b30	GGSGGGFSASSIGGGFGGGSR		2	1715.77	1	a3.a1	2
a3	pepa3b31	GGSGGSHGGGSGFGGESGGSY		2	1714.67	1	a3.a1	1
a3	pepa3b32	GGSGGSHGGGSGFGGESGGSYG		2	1771.69	1	a3.a1	2
a3	pepa3b33	GGSGGSHGGGSGFGGESGGSYGG		2	1828.71	1	a3.a1	4
a3	pepa3b34	GGSGGSHGGGSGFGGESGGSYGGG		2	1885.73	1	a3.a1	1
a3	pepa3b35	GGSGGSHGGGSGFGGESGGSYGGGE		2	2014.78	1	a3.a1	5
a3	pepa3b36	GGSGGSHGGGSGFGGESGGSYGGGEE		2	2143.82	1	a3.a1	14
a3	pepa3b37	GGSGGSHGGGSGFGGESGGSYGGGEEA		2	2214.86	1	a3.a1	8
a3	pepa3b38	GGSGGSHGGGSGFGGESGGSYGGGEEAS		2	2301.89	1	a3.a1	1
a3	pepa3b39	GGSGGSHGGGSGFGGESGGSYGGGEEASG		3	2358.91	1	a3.a1	4
a3	pepa3b40	GGSGGSHGGGSGFGGESGGSYGGGEEASGSGGGYGGGSG		3	3095.19	1	a3.a1	3
a3	pepa3b41	GGSGGSHGGGSGFGGESGGSYGGGEEASGSGGGYGGGSGK		3	3223.28	1	a3.a1	18
a3	pepa3b42	GGSGGSHGGGSGFGGESGGSYGGGEEASGSGGGYGGGSGKS		3	3310.31	1	a3.a1	7
a3	pepa3b43	GGSGGSHGGGSGFGGESGGSYGGGEEASGSGGGYGGGSGKSS		3	3397.35	1	a3.a1	8
a3	pepa3b44	GGSGGSHGGGSGFGGESGGSYGGGEEASGSGGGYGGGSGKSSHS		3	3621.44	1	a3.a1	3
a3	pepa3b45	GGSGGSYGGGGSGGGYGGGSGSR		2	1791.73	1	a3.a1	24
a3	pepa3b46	GGSGGSYGGGSGSGGGSGGGYGGGSGGGHSGGSGGGHSGGSGGN		3	3257.25	1	a3.a1	1
a3	pepa3b47	GGSGGSYGGGSGSGGGSGGGYGGGSGGGHSGGSGGGHSGGSGGNYG		3	3477.33	1	a3.a1	1
a3	pepa3b48	GGSGGSYGGGSGSGGGSGGGYGGGSGGGHSGGSGGGHSGGSGGNYGGG		3	3591.38	1	a3.a1	1
a3	pepa3b49	GGSYGGGEEASGSGGGYGGGSGK		2	1891.77	1	a3.a1	2
a3	pepa3b50	GIGGRGGSGGSYGR		2	1237.6	1	a3.a1	3
a3	pepa3b51	GSGGGFSASSIGGGFGGGSR		2	1658.75	1	a3.a1	1
a3	pepa3b52	GSRGGSGGSYGGGGSGGGYGGGSGSR		3	2091.88	1	a3.a1	8
a3	pepa3b53	GSYGGGEEASGSGGGYGGGSGK		2	1834.75	1	a3.a1	6
a3	pepa3b54	GVDADINGIR		2	1029.53	1	a3.a1	2
a3	pepa3b55	HGVQEIEIEIQ		2	1294.66	1	a3.a1	5
a3	pepa3b56	HGVQEIEIEIQSQ		2	1509.75	1	a3.a1	1
a3	pepa3b57	HGVQEIEIEIQSQISK		2	1837.97	1	a3.a1	39
a3	pepa3b58	HGVQEIEIEIQSQISK	11Q:0.98	2	1838.95	1	a3.a1	2
a3	pepa3b59	HGVQEIEIEIQSQISKK		3	1966.06	1	a3.a1	14
a3	pepa3b60	HNIIEGGQEDFESSGAGK		2	1874.85	1	a3.a1	16
a3	pepa3b61	IASYIDKVQA		2	1107.6	1	a3.a1	5
a3	pepa3b62	IASYIDKVQAI		2	1220.69	1	a3.a1	6
a3	pepa3b63	IASYIDKVQAIEEANNDIENK		2	2377.19	1	a3.a1	16
a3	pepa3b64	IASYIDKVQAIEEANNDIENK	16N:0.98	3	2378.17	1	a3.a1	2
a3	pepa3b65	IDDIKDQIVDITVGNNK		2	1900	1	a3.a1	4
a3	pepa3b66	IEGGQEDFESSGAGK		2	1510.67	1	a3.a1	3
a3	pepa3b67	IEHEVSSSGQEVQSSAK		3	1801.86	1	a3.a1	6
a3	pepa3b68	IEKEIETYHNIIEGGQEDFESSGAGK		3	2880.35	1	a3.a1	3
a3	pepa3b69	IGIGGRGGSGGSY		2	1137.56	1	a3.a1	5
a3	pepa3b70	IGIGGRGGSGGSYG		2	1194.59	1	a3.a1	6
a3	pepa3b71	IGIGGRGGSGGSYGR		2	1350.69	1	a3.a1	19
a3	pepa3b72	IGIGGRGGSGGSYGRG		3	1407.71	1	a3.a1	2
a3	pepa3b73	IGIGGRGGSGGSYGRGSR		3	1650.84	1	a3.a1	2
a3	pepa3b74	IIEGGQEDFESSGAGK		2	1623.75	1	a3.a1	5
a3	pepa3b75	IKFEMEQNIR		3	1307.68	1	a3.a1	17
a3	pepa3b76	IKFEMEQNIR	8N:0.98	2	1308.66	1	a3.a1	5
a3	pepa3b77	IKFEMEQNIR	5M:15.99	3	1323.67	1	a3.a1	22
a3	pepa3b78	IKFEMEQNIR	5M:15.99 7Q:0.98	2	1324.66	1	a3.a1	5
a3	pepa3b79	INVAPGKDITK		3	1155.67	1	a3.a1	2
a3	pepa3b80	ISNIEAQITDVR		2	1358.73	1	a3.a1	3
a3	pepa3b81	ITGQNSGDVNVEINVAPGKDITK		3	2369.23	1	a3.a1	2
a3	pepa3b82	ITQIEHEVSSSGQEVQSSAK		3	2144.05	1	a3.a1	2
a3	pepa3b83	MTIDDFR		2	897.413	1	a3.a1	7
a3	pepa3b84	MTIDDFR	1M:15.99	2	913.408	1	a3.a1	21
a3	pepa3b85	MTIDDFRIK	1M:15.99	3	1154.59	1	a3.a1	3
a3	pepa3b86	NDMRQEYEQIIAK	3M:15.99	3	1653.79	1	a3.a1	2
a3	pepa3b87	NEKSTMQEINSR		3	1436.68	1	a3.a1	5
a3	pepa3b88	NHKEEMSQITGQNSGDVNVEIN		3	2443.12	1	a3.a1	1
a3	pepa3b89	NHKEEMSQITGQNSGDVNVEIN	6M:15.99	3	2459.11	1	a3.a1	1
a3	pepa3b90	NHKEEMSQITGQNSGDVNVEINVAPGK		3	2895.39	1	a3.a1	6
a3	pepa3b91	NHKEEMSQITGQNSGDVNVEINVAPGK	6M:15.99	3	2911.39	1	a3.a1	4
a3	pepa3b92	NIIEGGQEDFESSGAGK		2	1737.79	1	a3.a1	3
a3	pepa3b93	NRKDIENQYETQIT		2	1751.86	1	a3.a1	3
a3	pepa3b94	NRKDIENQYETQITQ		3	1879.91	1	a3.a1	4
a3	pepa3b95	NSGDVNVEINVAPGKDITK		3	1970.02	1	a3.a1	2
a3	pepa3b96	NYSPYYNTIDDIK		2	1605.74	1	a3.a1	2
a3	pepa3b97	NYSPYYNTIDDIKDQIVDITVGNNK		3	2902.41	1	a3.a1	1
a3	pepa3b98	QEIECQNQEYSIIISIK	5C:57.02	2	2095.04	1	a3.a1	16
a3	pepa3b99	QEYEQIIAK	1Q:-17.03	2	1104.56	1	a3.a1	8
a3	pepa3c100	QEYEQIIAK		2	1121.58	1	a3.a1	6
a3	pepa3c101	QEYEQIIAK	5Q:0.98	2	1122.57	1	a3.a1	3
a3	pepa3c102	QGVDADINGIR	1Q:-17.03	2	1140.56	1	a3.a1	9
a3	pepa3c103	QGVDADINGIR	1Q:-17.03 8N:0.98	2	1141.55	1	a3.a1	9
a3	pepa3c104	QGVDADINGIR		2	1157.59	1	a3.a1	7
a3	pepa3c105	QGVDADINGIR	8N:0.98	2	1158.57	1	a3.a1	22
a3	pepa3c106	QGVDADINGIR	1Q:0.98 8N:0.98	2	1159.56	1	a3.a1	3
a3	pepa3c107	QIEHEVSSSGQEVQSSAK	1Q:-17.03	2	1912.89	1	a3.a1	7
a3	pepa3c108	QIEHEVSSSGQEVQSSAK		3	1929.91	1	a3.a1	6
a3	pepa3c109	QVIDNITMEK	1Q:-17.03	2	1173.58	1	a3.a1	7
a3	pepa3c110	QVIDNITMEK	1Q:-17.03 8M:15.99	2	1189.58	1	a3.a1	7
a3	pepa3c111	QVIDNITMEK		2	1190.61	1	a3.a1	8
a3	pepa3c112	QVIDNITMEK	8M:15.99	2	1206.6	1	a3.a1	8
a3	pepa3c113	RQGVDADINGIR		3	1313.69	1	a3.a1	5
a3	pepa3c114	SASSIGGGFGGGSR		2	1196.57	1	a3.a1	6
a3	pepa3c115	SDIEMQYETIQEEIMAIKK		3	2299.12	1	a3.a1	1
a3	pepa3c116	SDIEMQYETIQEEIMAIKK	5M:15.99	3	2315.11	1	a3.a1	14
a3	pepa3c117	SDIEMQYETIQEEIMAIKK	5M:15.99 15M:15.99	3	2331.11	1	a3.a1	10
a3	pepa3c118	SGDVNVEINVAPGKDITK		2	1855.98	1	a3.a1	1
a3	pepa3c119	SGGGFSASSIGGGFGGGSR		2	1601.73	1	a3.a1	7
a3	pepa3c120	SGGGGGGGIGSGGSIR		2	1232.6	1	a3.a1	3
a3	pepa3c121	SGGGGGGGIGSGGSIRSSYSR		3	1812.86	1	a3.a1	2
a3	pepa3c122	SGGSHGGGSGFGGESGGSYGGGEEASGSGGGYGGGSGK		3	3109.24	1	a3.a1	1
a3	pepa3c123	SGGSYGGGEEASGSGGGYGGGSGK		2	1978.8	1	a3.a1	5
a3	pepa3c124	SGGSYGGGEEASGSGGGYGGGSGKSSHS		3	2376.96	1	a3.a1	1
a3	pepa3c125	SHGGGSGFGGESGGSYGGGEEASGSGGGYGGGSGK		3	2908.16	1	a3.a1	3
a3	pepa3c126	SIIISIK		2	773.513	1	a3.a1	4
a3	pepa3c127	SSGQEVQSSAKEVTQIR		3	1833.93	1	a3.a1	1
a3	pepa3c128	SYGGGEEASGSGGGYGGGSGK		2	1777.73	1	a3.a1	3
a3	pepa3c129	SYGGGSGGGFSASSIGGGFGGGSR		2	2022.89	1	a3.a1	16
a3	pepa3c130	TANEKSTMQEINSR		3	1608.76	1	a3.a1	6
a3	pepa3c131	TIIDIDNTR		2	1060.56	1	a3.a1	11
a3	pepa3c132	TIIDIDNTR	7N:0.98	2	1061.55	1	a3.a1	3
a3	pepa3c133	TINDMRQEYEQI	5M:15.99	2	1555.71	1	a3.a1	2
a3	pepa3c134	TINDMRQEYEQIIAK		2	1851.93	1	a3.a1	20
a3	pepa3c135	TINDMRQEYEQIIAK	3N:0.98	2	1852.91	1	a3.a1	1
a3	pepa3c136	TINDMRQEYEQIIAK	5M:15.99	2	1867.92	1	a3.a1	14
a3	pepa3c137	TINDMRQEYEQIIAK	5M:15.99 7Q:0.98	2	1868.91	1	a3.a1	13
a3	pepa3c138	TQIEHEVSSSGQEVQSSAK		3	2030.96	1	a3.a1	1
a3	pepa3c139	TYHNIIEGGQEDFESSGAGK		3	2138.96	1	a3.a1	1
a3	pepa3c140	VDADINGIR		2	972.511	1	a3.a1	1
a3	pepa3c141	VEINVAPGKDITK		3	1383.78	1	a3.a1	3
a3	pepa3c142	VQAIEEANNDIENK		2	1586.77	1	a3.a1	16
a3	pepa3c143	VQAIEEANNDIENK	8N:0.98	2	1587.75	1	a3.a1	10
a3	pepa3c144	VQAIEEANNDIENKIQDWYDK		3	2535.2	1	a3.a1	1
a3	pepa3c145	YGGGSGGGFSASSIGGGFGGGSR		2	1935.86	1	a3.a1	1
a3	pepa3c146	YHNIIEGGQEDFESSGAGK		3	2037.91	1	a3.a1	2
a3	pepa3c147	YNTIDDIKDQIVDITVGNNK		3	2278.16	1	a3.a1	8
a4	pepa4a1	ADTIVAVEIDTYPNTDIGD		2	2021.95	1	a4.a1	3
a4	pepa4a2	ADTIVAVEIDTYPNTDIGDPSYPHIGIDIK		3	3242.61	1	a4.a1	37
a4	pepa4a3	AFFISNIDSSIPSGSTGR		2	1855.92	1	a4.a1	3
a4	pepa4a4	AIFYAPVHIWES		2	1432.73	1	a4.a1	1
a4	pepa4a5	AIFYAPVHIWESS		2	1519.76	1	a4.a1	2
a4	pepa4a6	AIHFMFNQFSK		2	1369.67	1	a4.a1	3
a4	pepa4a7	AIHFMFNQFSK	5M:15.99	2	1385.67	1	a4.a1	19
a4	pepa4a8	AIHFMFNQFSK	5M:15.99 8Q:0.98	2	1386.65	1	a4.a1	12
a4	pepa4a9	AIHFMFNQFSK	5M:15.99 7N:0.98 8Q:0.98	3	1387.64	1	a4.a1	1
a4	pepa4b10	ATTGTDGNIEITR		2	1348.67	1	a4.a1	9
a4	pepa4b11	AVEIDTYPNTDIGDPSYPHIGIDIK		3	2743.35	1	a4.a1	1
a4	pepa4b12	DATTGTDGNIEITR		2	1463.7	1	a4.a1	9
a4	pepa4b13	DATTGTDGNIEITR	9N:0.98	2	1464.68	1	a4.a1	1
a4	pepa4b14	DIGDPSYPHIGIDIK		2	1639.83	1	a4.a1	5
a4	pepa4b15	DIIIQGDATTGTD		2	1319.63	1	a4.a1	1
a4	pepa4b16	DIIIQGDATTGTDG		2	1376.65	1	a4.a1	2
a4	pepa4b17	DIIIQGDATTGTDGN		2	1490.7	1	a4.a1	2
a4	pepa4b18	DIIIQGDATTGTDGNIEITR		2	2103.06	1	a4.a1	287
a4	pepa4b19	DIIIQGDATTGTDGNIEITR	5Q:0.98	3	2104.04	1	a4.a1	4
a4	pepa4b20	DNVIPEWVR		2	1127.58	1	a4.a1	1
a4	pepa4b21	DPSYPHIGIDIK		2	1354.7	1	a4.a1	17
a4	pepa4b22	DQKDIIIQG		2	1029.56	1	a4.a1	1
a4	pepa4b23	DQKDIIIQGDAT		2	1316.67	1	a4.a1	1
a4	pepa4b24	DQKDIIIQGDATT		2	1417.72	1	a4.a1	5
a4	pepa4b25	DQKDIIIQGDATTG		2	1474.74	1	a4.a1	7
a4	pepa4b26	DQKDIIIQGDATTGTD		2	1690.81	1	a4.a1	5
a4	pepa4b27	DQKDIIIQGDATTGTDG		2	1747.83	1	a4.a1	6
a4	pepa4b28	DQKDIIIQGDATTGTDGNIEITR		2	2474.24	1	a4.a1	161
a4	pepa4b29	DQKDIIIQGDATTGTDGNIEITR	8Q:0.98	2	2475.22	1	a4.a1	14
a4	pepa4b30	DTYPNTDIGDPSYPHIGIDIK		3	2331.11	1	a4.a1	4
a4	pepa4b31	EATFTFIIK		2	1069.59	1	a4.a1	7
a4	pepa4b32	ETNAIHFMFNQFSK	1E:-18.01 8M:15.99	2	1711.79	1	a4.a1	6
a4	pepa4b33	ETNAIHFMFNQFSK	8M:15.99	2	1729.8	1	a4.a1	12
a4	pepa4b34	ETNTIISWSFTSK		2	1513.75	1	a4.a1	41
a4	pepa4b35	ETNTIISWSFTSK	3N:0.98	2	1514.74	1	a4.a1	7
a4	pepa4b36	ETNTIISWSFTSK	8W:15.99	2	1529.75	1	a4.a1	37
a4	pepa4b37	ETNTIISWSFTSK	3N:0.98 8W:15.99	2	1530.73	1	a4.a1	1
a4	pepa4b38	FFISNIDSSIPSGSTGR		2	1784.88	1	a4.a1	3
a4	pepa4b39	FISNIDSSIPSGSTGR		2	1637.81	1	a4.a1	12
a4	pepa4b40	FISNIDSSIPSGSTGR	4N:0.98	2	1638.8	1	a4.a1	6
a4	pepa4b41	FMFNQFSK		2	1048.49	1	a4.a1	1
a4	pepa4b42	FMFNQFSK	2M:15.99	2	1064.49	1	a4.a1	7
a4	pepa4b43	GDATTGTDGNIEITR		2	1520.72	1	a4.a1	9
a4	pepa4b44	GDPSYPHIGIDIK		3	1411.72	1	a4.a1	1
a4	pepa4b45	GIAFFISNIDSSIPSGSTGR		2	2026.02	1	a4.a1	4
a4	pepa4b46	GISASTGIYK		2	996.536	1	a4.a1	6
a4	pepa4b47	GTAHIIYNSVDK		2	1317.68	1	a4.a1	7
a4	pepa4b48	GTAHIIYNSVDKR		3	1473.78	1	a4.a1	21
a4	pepa4b49	GTAHIIYNSVDKR	8N:0.98	3	1474.76	1	a4.a1	2
a4	pepa4b50	GTDGNIEITR		2	1075.54	1	a4.a1	5
a4	pepa4b51	HETNAIHFMFNQFSK	9M:15.99	3	1866.86	1	a4.a1	2
a4	pepa4b52	HFMFNQFSK	3M:15.99	2	1201.55	1	a4.a1	7
a4	pepa4b53	HFMFNQFSK	3M:15.99 5N:0.98	2	1202.53	1	a4.a1	1
a4	pepa4b54	HIIYNSVDKR		3	1244.67	1	a4.a1	2
a4	pepa4b55	IAFFISNIDSSIPSGSTGR		2	1969	1	a4.a1	3
a4	pepa4b56	IDSSIPSGSTGR		2	1176.59	1	a4.a1	8
a4	pepa4b57	IGDPSYPHIGIDIK		3	1524.81	1	a4.a1	8
a4	pepa4b58	IHFMFNQFSK	4M:15.99	3	1314.63	1	a4.a1	1
a4	pepa4b59	IIGIFPDAN	9N:0.98	2	960.504	1	a4.a1	1
a4	pepa4b60	IIIQGDATTGTDGNIEITR		2	1988.03	1	a4.a1	3
a4	pepa4b61	IIQGDATTGTDGNIEITR		2	1874.95	1	a4.a1	4
a4	pepa4b62	IIQGDATTGTDGNIEITR	13N:0.98	2	1875.93	1	a4.a1	1
a4	pepa4b63	IIYNSVDKR		3	1107.62	1	a4.a1	9
a4	pepa4b64	IIYNSVDKR	4N:0.98	3	1108.6	1	a4.a1	14
a4	pepa4b65	IQGDATTGTDGNIEITR		2	1761.86	1	a4.a1	8
a4	pepa4b66	IQGDATTGTDGNIEITR	2Q:0.98	2	1762.85	1	a4.a1	1
a4	pepa4b67	ISASTGIYK		2	939.515	1	a4.a1	1
a4	pepa4b68	ISAVVSYPNA		2	1020.54	1	a4.a1	1
a4	pepa4b69	ISAVVSYPNADSA		2	1293.63	1	a4.a1	1
a4	pepa4b70	ISAVVSYPNADSATVSYDVDIDNVIPEWVR		3	3294.62	1	a4.a1	9
a4	pepa4b71	ISAVVSYPNADSATVSYDVDIDNVIPEWVR	28W:15.99	3	3310.61	1	a4.a1	2
a4	pepa4b72	ISAVVSYPNADSATVSYDVDIDNVIPEWVR	26P:15.99 28W:15.99	3	3326.61	1	a4.a1	8
a4	pepa4b73	ISNIDSSIPSGSTGR		2	1490.74	1	a4.a1	19
a4	pepa4b74	ISNIDSSIPSGSTGR	3N:0.98	2	1491.73	1	a4.a1	8
a4	pepa4b75	KETNTIISWSFTSK		2	1641.85	1	a4.a1	1
a4	pepa4b76	KKTAKWNMQNGKVGTAHIIYNSVDK	7N:0.98	3	2832.48	1	a4.a1	3
a4	pepa4b77	KVGTAHIIYNSVDKR		3	1700.94	1	a4.a1	3
a4	pepa4b78	KVSSSTHETNAIHFMFNQFSK	10N:0.98 15M:15.99	3	2457.15	1	a4.a1	1
a4	pepa4b79	NAIHFMFNQFSK	6M:15.99	2	1499.71	1	a4.a1	4
a4	pepa4b80	NIDSSIPSGSTGR		2	1290.63	1	a4.a1	15
a4	pepa4b81	NTDIGDPSYPHIGIDIK		3	1854.92	1	a4.a1	5
a4	pepa4b82	NVIPEWVR		2	1012.56	1	a4.a1	7
a4	pepa4b83	QGDATTGTDGNIEITR		2	1648.78	1	a4.a1	8
a4	pepa4b84	RISAVVSYPNAD		2	1291.66	1	a4.a1	1
a4	pepa4b85	RVGISASTGIYK		2	1251.71	1	a4.a1	12
a4	pepa4b86	RVSSNGSPQGSSVGR		2	1474.74	1	a4.a1	1
a4	pepa4b87	SHPADGIAFFISNIDSSIPSGSTGR		3	2533.23	1	a4.a1	2
a4	pepa4b88	SKDQKDIIIQGDATTGTDGNIEITR	4Q:0.98	3	2690.35	1	a4.a1	1
a4	pepa4b89	SNIDSSIPSGSTGR		2	1377.66	1	a4.a1	8
a4	pepa4b90	SPDSHPAD		2	825.337	1	a4.a1	2
a4	pepa4b91	SPDSHPADGIAF		2	1213.55	1	a4.a1	12
a4	pepa4b92	SPDSHPADGIAFF		2	1360.62	1	a4.a1	15
a4	pepa4b93	SPDSHPADGIAFFIS		2	1560.73	1	a4.a1	9
a4	pepa4b94	SPDSHPADGIAFFISN		2	1674.78	1	a4.a1	4
a4	pepa4b95	SPDSHPADGIAFFISNIDSSIPSGSTGR		3	2832.34	1	a4.a1	41
a4	pepa4b96	SPDSHPADGIAFFISNIDSSIPSGSTGR	6P:15.99	3	2848.34	1	a4.a1	7
a4	pepa4b97	STHETNAIHFMFNQFSK		2	2038.94	1	a4.a1	3
a4	pepa4b98	STHETNAIHFMFNQFSK	13N:0.98	2	2039.93	1	a4.a1	4
a4	pepa4b99	STHETNAIHFMFNQFSK	11M:15.99	2	2054.94	1	a4.a1	40
a4	pepa4c100	STHETNAIHFMFNQFSK	6N:0.98 11M:15.99	2	2055.92	1	a4.a1	13
a4	pepa4c101	TAHIIYNSVDK		3	1260.66	1	a4.a1	6
a4	pepa4c102	TAHIIYNSVDKR		2	1416.76	1	a4.a1	18
a4	pepa4c103	TAHIIYNSVDKR	7N:0.98	3	1417.74	1	a4.a1	4
a4	pepa4c104	TDGNIEITR		2	1018.52	1	a4.a1	7
a4	pepa4c105	TDIGDPSYPHIGIDIK		2	1740.88	1	a4.a1	18
a4	pepa4c106	TGTDGNIEITR		2	1176.59	1	a4.a1	5
a4	pepa4c107	THETNAIHFMFNQFSK		3	1951.91	1	a4.a1	1
a4	pepa4c108	THETNAIHFMFNQFSK	10M:15.99	2	1967.91	1	a4.a1	9
a4	pepa4c109	TIISWSFTSK		2	1169.62	1	a4.a1	6
a4	pepa4c110	TIVAVEIDTYPNTDIGDPSYPHIGIDIK		3	3056.55	1	a4.a1	3
a4	pepa4c111	TNAIHFMFNQFSK	7M:15.99	2	1600.76	1	a4.a1	5
a4	pepa4c112	TNTIISWSFTSK		2	1384.71	1	a4.a1	2
a4	pepa4c113	TTGTDGNIEITR		2	1277.63	1	a4.a1	6
a4	pepa4c114	VEIDTYPNTDIGDPSYPHIGIDIK		3	2672.31	1	a4.a1	5
a4	pepa4c115	VEIDTYPNTDIGDPSYPHIGIDIK	8N:0.98	3	2673.29	1	a4.a1	1
a4	pepa4c116	VGISASTGIYK		2	1095.6	1	a4.a1	98
a4	pepa4c117	VGISASTGIYKE		2	1224.65	1	a4.a1	7
a4	pepa4c118	VGISASTGIYKET		2	1325.69	1	a4.a1	3
a4	pepa4c119	VGISASTGIYKETN		2	1439.74	1	a4.a1	3
a4	pepa4c120	VGISASTGIYKETNTII		2	1766.95	1	a4.a1	1
a4	pepa4c121	VGISASTGIYKETNTIISWSFTSK		3	2590.34	1	a4.a1	7
a4	pepa4c122	VGTAHIIY		2	873.483	1	a4.a1	1
a4	pepa4c123	VGTAHIIYN		2	987.526	1	a4.a1	5
a4	pepa4c124	VGTAHIIYNSVD		2	1288.65	1	a4.a1	4
a4	pepa4c125	VGTAHIIYNSVD	9N:0.98	2	1289.64	1	a4.a1	1
a4	pepa4c126	VGTAHIIYNSVDK		2	1416.75	1	a4.a1	29
a4	pepa4c127	VGTAHIIYNSVDK	9N:0.98	2	1417.73	1	a4.a1	23
a4	pepa4c128	VGTAHIIYNSVDKR		2	1572.85	1	a4.a1	143
a4	pepa4c129	VGTAHIIYNSVDKR	9N:0.98	2	1573.83	1	a4.a1	17
a4	pepa4c130	VSSNGSPQGSSVGR	4N:0.98	2	1319.62	1	a4.a1	1
a4	pepa4c131	WNMQNGKVGTAHIIYNSVDKR	1W:15.99 4Q:0.98	3	2448.21	1	a4.a1	1
a4	pepa4c132	YPNTDIGDPSYPHIGIDIK		3	2115.04	1	a4.a1	1
a5	pepa5a1	AFIIYQEPVIGPVR		2	1601.9	1	a5.a1	1
a5	pepa5a2	AVPYPQRDM		2	1076.52	1	a5.a1	2
a5	pepa5a3	AVPYPQRDM	9M:15.99	2	1092.51	1	a5.a1	2
a5	pepa5a4	AVPYPQRDMPI		2	1286.66	1	a5.a1	7
a5	pepa5a5	AVPYPQRDMPIQ		2	1414.71	1	a5.a1	7
a5	pepa5a6	AVPYPQRDMPIQ	9M:15.99	2	1430.71	1	a5.a1	7
a5	pepa5a7	AVPYPQRDMPIQA		2	1485.75	1	a5.a1	6
a5	pepa5a8	AVPYPQRDMPIQA	12Q:0.98	2	1486.74	1	a5.a1	1
a5	pepa5a9	AVPYPQRDMPIQA	9M:15.99	2	1501.75	1	a5.a1	9
a5	pepa5b10	AVPYPQRDMPIQA	6Q:0.98 9M:15.99	2	1502.73	1	a5.a1	4
a5	pepa5b11	AVPYPQRDMPIQAF		2	1632.82	1	a5.a1	9
a5	pepa5b12	AVPYPQRDMPIQAF	9M:15.99	2	1648.82	1	a5.a1	9
a5	pepa5b13	AVPYPQRDMPIQAFI		2	1745.9	1	a5.a1	3
a5	pepa5b14	AVPYPQRDMPIQAFI	9M:15.99	2	1761.9	1	a5.a1	6
a5	pepa5b15	DMPIQAF		2	821.386	1	a5.a1	2
a5	pepa5b16	DMPIQAFIIYQEPVIGPVR	2M:15.99	3	2202.16	1	a5.a1	1
a5	pepa5b17	EMPFPKYPVE		2	1236.6	1	a5.a1	2
a5	pepa5b18	EMPFPKYPVEP	2M:15.99	2	1349.64	1	a5.a1	1
a5	pepa5b19	EMPFPKYPVEPF		2	1480.72	1	a5.a1	2
a5	pepa5b20	EMPFPKYPVEPF	2M:15.99	2	1496.71	1	a5.a1	8
a5	pepa5b21	EMPFPKYPVEPFTE		2	1710.81	1	a5.a1	5
a5	pepa5b22	EMPFPKYPVEPFTE	2M:15.99	2	1726.8	1	a5.a1	6
a5	pepa5b23	EMPFPKYPVEPFTES		2	1797.84	1	a5.a1	3
a5	pepa5b24	EMPFPKYPVEPFTES	2M:15.99	2	1813.84	1	a5.a1	2
a5	pepa5b25	EMPFPKYPVEPFTESQ		2	1925.9	1	a5.a1	9
a5	pepa5b26	EMPFPKYPVEPFTESQ	2M:15.99	2	1941.89	1	a5.a1	8
a5	pepa5b27	EMPFPKYPVEPFTESQS		2	2012.93	1	a5.a1	7
a5	pepa5b28	EMPFPKYPVEPFTESQS	2M:15.99	2	2028.93	1	a5.a1	7
a5	pepa5b29	EMPFPKYPVEPFTESQSI		2	2126.02	1	a5.a1	4
a5	pepa5b30	EMPFPKYPVEPFTESQSI	2M:15.99	2	2142.01	1	a5.a1	4
a5	pepa5b31	EMPFPKYPVEPFTESQSIT		2	2227.06	1	a5.a1	2
a5	pepa5b32	FIIYQEPVIGPVR		2	1530.87	1	a5.a1	9
a5	pepa5b33	FQSEEQQQTEDEIQDKIHPFAQTQ		3	2904.33	1	a5.a1	5
a5	pepa5b34	GPVRGPFPIIV		2	1151.69	1	a5.a1	4
a5	pepa5b35	HKEMPFPK		2	1013.52	1	a5.a1	2
a5	pepa5b36	HKEMPFPKYP		3	1273.64	1	a5.a1	1
a5	pepa5b37	HKEMPFPKYPVE		3	1501.75	1	a5.a1	1
a5	pepa5b38	HKEMPFPKYPVEPF		3	1745.87	1	a5.a1	8
a5	pepa5b39	HKEMPFPKYPVEPF	4M:15.99	2	1761.87	1	a5.a1	4
a5	pepa5b40	HKEMPFPKYPVEPFT	4M:15.99	3	1862.91	1	a5.a1	1
a5	pepa5b41	HKEMPFPKYPVEPFTE		3	1975.96	1	a5.a1	1
a5	pepa5b42	HKEMPFPKYPVEPFTE	4M:15.99	2	1991.96	1	a5.a1	2
a5	pepa5b43	HKEMPFPKYPVEPFTESQ		3	2191.05	1	a5.a1	4
a5	pepa5b44	HKEMPFPKYPVEPFTESQ	4M:15.99	2	2207.05	1	a5.a1	7
a5	pepa5b45	HKEMPFPKYPVEPFTESQS		3	2278.08	1	a5.a1	4
a5	pepa5b46	HKEMPFPKYPVEPFTESQS	4M:15.99	2	2294.08	1	a5.a1	7
a5	pepa5b47	HKEMPFPKYPVEPFTESQSI		3	2391.17	1	a5.a1	1
a5	pepa5b48	HKEMPFPKYPVEPFTESQSI	4M:15.99	3	2407.16	1	a5.a1	2
a5	pepa5b49	HKEMPFPKYPVEPFTESQSIT		3	2492.22	1	a5.a1	1
a5	pepa5b50	HKEMPFPKYPVEPFTESQSIT	4M:15.99	3	2508.21	1	a5.a1	3
a5	pepa5b51	IHPFAQTQSIVYPFPGPIPN		3	2223.16	1	a5.a1	1
a5	pepa5b52	IIYQEPVIGPVR		3	1383.8	1	a5.a1	15
a5	pepa5b53	IQPEVMGVSK		2	1087.58	1	a5.a1	1
a5	pepa5b54	IQPEVMGVSK	6M:15.99	2	1103.58	1	a5.a1	2
a5	pepa5b55	IQPEVMGVSKVK		3	1314.74	1	a5.a1	1
a5	pepa5b56	IQPEVMGVSKVK	6M:15.99	3	1330.74	1	a5.a1	1
a5	pepa5b57	IQPEVMGVSKVKEAMAPK		3	1942.05	1	a5.a1	1
a5	pepa5b58	IQPEVMGVSKVKEAMAPK	6M:15.99	3	1958.04	1	a5.a1	1
a5	pepa5b59	ISISQSKVIPVPQK		2	1523.92	1	a5.a1	6
a5	pepa5b60	ISQSKVIPVPQKAVPYPQR		3	2135.23	1	a5.a1	2
a5	pepa5b61	IYQEPVIGPVR		2	1270.72	1	a5.a1	8
a5	pepa5b62	KAVPYPQR		2	958.547	1	a5.a1	3
a5	pepa5b63	KIEKFQSEEQQQTEDEIQ		3	2237.06	1	a5.a1	1
a5	pepa5b64	KVIPVPQK		2	908.593	1	a5.a1	1
a5	pepa5b65	KVIPVPQKAVPYPQR		3	1720.03	1	a5.a1	4
a5	pepa5b66	MGVSKVKEAMAPK	10M:15.99	3	1391.74	1	a5.a1	6
a5	pepa5b67	PPFIQPEVMGVSK		2	1428.76	1	a5.a1	11
a5	pepa5b68	PPFIQPEVMGVSK	9M:15.99	2	1444.75	1	a5.a1	6
a5	pepa5b69	PPFIQPEVMGVSKVK		3	1655.92	1	a5.a1	1
a5	pepa5b70	PPQSVISISQSK		2	1270.7	1	a5.a1	7
a5	pepa5b71	PPQSVISISQSKVIPVPQK		3	2032.18	1	a5.a1	3
a5	pepa5b72	PVIGPVR		2	737.467	1	a5.a1	1
a5	pepa5b73	PVPQKAVPYPQR		3	1379.78	1	a5.a1	7
a5	pepa5b74	PVVVPPFIQPEVMGVSK		2	1823.01	1	a5.a1	14
a5	pepa5b75	PVVVPPFIQPEVMGVSK	13M:15.99	2	1839.01	1	a5.a1	15
a5	pepa5b76	PVVVPPFIQPEVMGVSKVK	13M:15.99	3	2066.17	1	a5.a1	1
a5	pepa5b77	QAFIIYQEPVIGPVR	1Q:0.98	2	1730.95	1	a5.a1	1
a5	pepa5b78	QEPVIGPVR	1Q:-17.03	2	977.541	1	a5.a1	6
a5	pepa5b79	QEPVIGPVR		2	994.568	1	a5.a1	8
a5	pepa5b80	QKAVPYPQR	1Q:-17.03	2	1069.58	1	a5.a1	2
a5	pepa5b81	QSKVIPVPQK	1Q:-17.03	2	1106.66	1	a5.a1	2
a5	pepa5b82	QSKVIPVPQK		2	1123.68	1	a5.a1	4
a5	pepa5b83	QSKVIPVPQKAVPYPQR		3	1935.12	1	a5.a1	4
a5	pepa5b84	SISQSKVIPVPQK		2	1410.83	1	a5.a1	15
a5	pepa5b85	SISQSKVIPVPQKAVPYPQR		3	2222.27	1	a5.a1	2
a5	pepa5b86	SKVIPVPQK		2	995.625	1	a5.a1	3
a5	pepa5b87	SKVIPVPQKAVPYPQR		3	1807.06	1	a5.a1	3
a5	pepa5b88	SQSKVIPVPQK		2	1210.72	1	a5.a1	17
a5	pepa5b89	SQSKVIPVPQKAVPYPQR		3	2022.15	1	a5.a1	11
a5	pepa5b90	SVISISQSK		2	948.536	1	a5.a1	5
a5	pepa5b91	SVISISQSKVIPVPQK		3	1710.02	1	a5.a1	4
a5	pepa5b92	TPVVVPPFIQPEVMGVSK		2	1924.06	1	a5.a1	1
a5	pepa5b93	TPVVVPPFIQPEVMGVSK	14M:15.99	2	1940.06	1	a5.a1	1
a5	pepa5b94	VIPVPQK		2	780.498	1	a5.a1	1
a5	pepa5b95	VIPVPQK	6Q:0.98	2	781.482	1	a5.a1	1
a5	pepa5b96	VIPVPQKA		2	851.535	1	a5.a1	8
a5	pepa5b97	VIPVPQKAV		2	950.603	1	a5.a1	7
a5	pepa5b98	VIPVPQKAVP		2	1047.66	1	a5.a1	8
a5	pepa5b99	VIPVPQKAVPYP		2	1307.77	1	a5.a1	4
a5	pepa5c100	VIPVPQKAVPYPQ		2	1435.83	1	a5.a1	9
a5	pepa5c101	VIPVPQKAVPYPQ	13Q:0.98	2	1436.81	1	a5.a1	2
a5	pepa5c102	VIPVPQKAVPYPQR		2	1591.93	1	a5.a1	20
a5	pepa5c103	VIPVPQKAVPYPQR	6Q:0.98	3	1592.92	1	a5.a1	4
a5	pepa5c104	VIPVPQKAVPYPQRD		2	1706.96	1	a5.a1	14
a5	pepa5c105	VIPVPQKAVPYPQRDM	16M:15.99	3	1853.99	1	a5.a1	1
a5	pepa5c106	VIPVPQKAVPYPQRDMPI		3	2048.14	1	a5.a1	5
a5	pepa5c107	VIPVPQKAVPYPQRDMPI	16M:15.99	3	2064.13	1	a5.a1	7
a5	pepa5c108	VIPVPQKAVPYPQRDMPIQ		3	2176.19	1	a5.a1	4
a5	pepa5c109	VIPVPQKAVPYPQRDMPIQ	16M:15.99	3	2192.19	1	a5.a1	7
a5	pepa5c110	VIPVPQKAVPYPQRDMPIQA		2	2247.23	1	a5.a1	13
a5	pepa5c111	VIPVPQKAVPYPQRDMPIQA	13Q:0.98	3	2248.22	1	a5.a1	2
a5	pepa5c112	VIPVPQKAVPYPQRDMPIQA	16M:15.99	2	2263.23	1	a5.a1	10
a5	pepa5c113	VIPVPQKAVPYPQRDMPIQAF		3	2394.3	1	a5.a1	7
a5	pepa5c114	VIPVPQKAVPYPQRDMPIQAF	16M:15.99	2	2410.3	1	a5.a1	10
a5	pepa5c115	VISISQSKVIPVPQK		3	1622.98	1	a5.a1	5
a5	pepa5c116	VMGVSKVKEAMAPK		3	1474.81	1	a5.a1	2
a5	pepa5c117	VMGVSKVKEAMAPK	2M:15.99 11M:15.99	3	1506.8	1	a5.a1	3
a5	pepa5c118	VPQKAVPYPQR		3	1282.73	1	a5.a1	6
a5	pepa5c119	VVPPFIQPEVMGVSK		2	1626.89	1	a5.a1	6
a5	pepa5c120	VVPPFIQPEVMGVSK	11M:15.99	2	1642.89	1	a5.a1	6
a5	pepa5c121	YPVEPFTESQ		2	1196.55	1	a5.a1	5
a5	pepa5c122	YPVEPFTESQS		2	1283.58	1	a5.a1	7
a5	pepa5c123	YPVEPFTESQSI		2	1396.66	1	a5.a1	6
a5	pepa5c124	YPVEPFTESQSIT		2	1497.71	1	a5.a1	4
a5	pepa5c125	YPVEPFTESQSITIT		2	1711.84	1	a5.a1	2
a5	pepa5c126	YPVEPFTESQSITITD		2	1826.87	1	a5.a1	5
a5	pepa5c127	YQEPVIGPVR		2	1157.63	1	a5.a1	9
a6	pepa6a1	AGIIPTPEEIR		2	1195.67	2	a6.a6 a6.b10	9
a6	pepa6a2	AHEIANDVEYVNK		2	1501.73	7	a6.a1 a6.a2 a6.a3 a6.a4 a6.a6 a6.a9 a6.b10	8
a6	pepa6a3	AIPDKITPDG		2	1026.55	5	a6.a1 a6.a2 a6.a3 a6.a4 a6.a8	5
a6	pepa6a4	AIPDKITPDGH		2	1163.61	5	a6.a1 a6.a2 a6.a3 a6.a4 a6.a8	2
a6	pepa6a5	AIPDKITPDGHR		2	1319.71	5	a6.a1 a6.a2 a6.a3 a6.a4 a6.a8	19
a6	pepa6a6	AIPDKITPDGHR	8P:15.99	2	1335.7	5	a6.a1 a6.a2 a6.a3 a6.a4 a6.a8	5
a6	pepa6a7	AITFACIR	6C:57.02	2	951.508	1	a6.a3	7
a6	pepa6a8	AITFDCIR	6C:57.02	2	995.498	1	a6.a1	8
a6	pepa6a9	AITFDCIRQEFT	6C:57.02	2	1500.72	1	a6.a1	5
a6	pepa6b10	AITFDCIRQEFT	6C:57.02 9Q:0.98	2	1501.7	1	a6.a1	1
a6	pepa6b11	AITFSCIR	6C:57.02	2	967.503	1	a6.a2	8
a6	pepa6b12	ANWTHAQIR		3	1096.56	1	a6.a4	1
a6	pepa6b13	ANWTHAQIR	2N:0.98	3	1097.55	1	a6.a4	1
a6	pepa6b14	ANWTHDQIR		2	1140.55	3	a6.a1 a6.a2 a6.a3	11
a6	pepa6b15	DPIFYSH		2	878.404	11	a6.a1 a6.a2 a6.a3 a6.a4 a6.a5 a6.a6 a6.a7 a6.a8 a6.a9 a6.b10 a6.b14	3
a6	pepa6b16	DPIFYSHH		2	1015.46	11	a6.a1 a6.a2 a6.a3 a6.a4 a6.a5 a6.a6 a6.a7 a6.a8 a6.a9 a6.b10 a6.b14	1
a6	pepa6b17	DPIFYSHHAN		3	1200.54	9	a6.a1 a6.a2 a6.a3 a6.a4 a6.a5 a6.a6 a6.a7 a6.a8 a6.a9	2
a6	pepa6b18	DPIFYSHHANIDR		3	1584.76	1	a6.a9	3
a6	pepa6b19	DPIFYSHHANVDR		2	1570.74	8	a6.a1 a6.a2 a6.a3 a6.a4 a6.a5 a6.a6 a6.a7 a6.a8	22
a6	pepa6b20	DPIFYSHHANVDR	2P:15.99	3	1586.73	8	a6.a1 a6.a2 a6.a3 a6.a4 a6.a5 a6.a6 a6.a7 a6.a8	8
a6	pepa6b21	DPIFYSHHGNVDR	2P:15.99 10N:0.98	3	1573.7	1	a6.b10	1
a6	pepa6b22	DPIFYSHHSNVDR		2	1586.73	1	a6.b14	16
a6	pepa6b23	DPIFYTHHSNVDR		2	1600.75	2	a6.b11 a6.b13	11
a6	pepa6b24	DPVIASSVGFCKPVR	11C:57.02	2	1631.86	5	a6.a1 a6.a2 a6.a3 a6.a4 a6.b12	20
a6	pepa6b25	DPVIASSVGFCKPVR	2P:15.99 11C:57.02	3	1647.85	5	a6.a1 a6.a2 a6.a3 a6.a4 a6.b12	8
a6	pepa6b26	DVTAQVPVADEDIFR		2	1674.83	1	a6.a5	6
a6	pepa6b27	EHGFGSNIQAIR		3	1328.67	1	a6.a9	3
a6	pepa6b28	EPVIASSIGSCKPVPVIK	1E:-18.01 2P:15.99 11C:57.02	3	1879.04	1	a6.b11	3
a6	pepa6b29	EPVIASSIGSCKPVPVIK	11C:57.02	2	1881.05	1	a6.b11	16
a6	pepa6b30	EPVIGTSIFR		2	1118.62	2	a6.a6 a6.b10	1
a6	pepa6b31	FDASIEKER		3	1094.55	4	a6.a1 a6.a2 a6.a3 a6.a4	1
a6	pepa6b32	FDCIRQEFT	3C:57.02	2	1215.55	3	a6.a1 a6.a7 a6.a8	8
a6	pepa6b33	FDCIRQEFT	3C:57.02 6Q:0.98	2	1216.53	3	a6.a1 a6.a7 a6.a8	7
a6	pepa6b34	FDMFINYPAAHR		3	1481.7	1	a6.b11	6
a6	pepa6b35	FDMFINYPAAHR	3M:15.99	3	1497.69	1	a6.b11	6
a6	pepa6b36	FRPHGYGWN		3	1133.53	4	a6.a1 a6.a2 a6.a7 a6.a8	1
a6	pepa6b37	FRPHGYGWNIK		3	1374.71	4	a6.a1 a6.a2 a6.a7 a6.a8	3
a6	pepa6b38	FRPHGYGWNIK	8W:15.99	3	1390.7	4	a6.a1 a6.a2 a6.a7 a6.a8	6
a6	pepa6b39	FSTSIAIKR		2	1022.6	4	a6.a1 a6.a2 a6.a3 a6.a8	11
a6	pepa6b40	FTTGIAIR		2	878.509	2	a6.a6 a6.b10	3
a6	pepa6b41	FYSHHANVDR		2	1245.58	8	a6.a1 a6.a2 a6.a3 a6.a4 a6.a5 a6.a6 a6.a7 a6.a8	4
a6	pepa6b42	GAPIHCCIPEPK	6C:57.02 7C:57.02	2	1378.66	1	a6.b11	1
a6	pepa6b43	GISNVDEIQENVVIEK		2	1785.92	1	a6.b11	9
a6	pepa6b44	GQVYEMVYNK	6M:15.99	2	1246.58	4	a6.a1 a6.a2 a6.a3 a6.a4	1
a6	pepa6b45	GTQAINVNQISEGVVIEHVR		2	2163.15	1	a6.a1	18
a6	pepa6b46	GTQAINVNQISEGVVIEHVR	6N:0.98	3	2164.14	1	a6.a1	10
a6	pepa6b47	GTQAINVQQISEGVVFEHVR	6N:0.98 8Q:0.98	2	2213.12	1	a6.a7	2
a6	pepa6b48	GTQAQNVDQISETVVIEHVR		3	2223.14	1	a6.a9	2
a6	pepa6b49	GTQAQNVDQISETVVIEHVR	5Q:0.98 9Q:0.98	3	2225.1	1	a6.a9	1
a6	pepa6b50	GTQAQNVNQISEGVVIEHVR		3	2178.13	2	a6.a3 a6.a8	9
a6	pepa6b51	GTQAQNVNQISEGVVIEHVR	6N:0.98	3	2179.11	2	a6.a3 a6.a8	10
a6	pepa6b52	GTQAQNVNQISEGVVIEHVR	5Q:0.98 9Q:0.98	3	2180.09	2	a6.a3 a6.a8	1
a6	pepa6b53	GTQAQNVQQISEGVVFEHVR		2	2226.13	1	a6.a2	13
a6	pepa6b54	GTQAQNVQQISEGVVFEHVR	9Q:0.98	3	2227.11	1	a6.a2	7
a6	pepa6b55	GTQAQNVQQISEGVVFEHVR	5Q:0.98 9Q:0.98	3	2228.09	1	a6.a2	5
a6	pepa6b56	HANIGQVYEMVYN		2	1537.71	4	a6.a1 a6.a2 a6.a3 a6.a4	1
a6	pepa6b57	HANIGQVYEMVYN	10M:15.99	2	1553.71	4	a6.a1 a6.a2 a6.a3 a6.a4	1
a6	pepa6b58	HANIGQVYEMVYNK		2	1665.81	4	a6.a1 a6.a2 a6.a3 a6.a4	46
a6	pepa6b59	HANIGQVYEMVYNK	3N:0.98	2	1666.79	4	a6.a1 a6.a2 a6.a3 a6.a4	11
a6	pepa6b60	HANIGQVYEMVYNK	10M:15.99	2	1681.8	4	a6.a1 a6.a2 a6.a3 a6.a4	23
a6	pepa6b61	HANIGQVYEMVYNK	3N:0.98 10M:15.99	2	1682.78	4	a6.a1 a6.a2 a6.a3 a6.a4	18
a6	pepa6b62	HANIGQVYQMVYNK	9Q:0.98 10M:15.99 13N:0.98	3	1682.78	1	a6.a7	1
a6	pepa6b63	HIGEISEGIIIEK		2	1437.79	1	a6.a5	4
a6	pepa6b64	IANDVEYVNK		2	1164.59	7	a6.a1 a6.a2 a6.a3 a6.a4 a6.a6 a6.a9 a6.b10	4
a6	pepa6b65	IGIMYQDMSEADSIWINHKPK	4M:15.99	3	2492.19	2	a6.a6 a6.b10	1
a6	pepa6b66	IGITDYNTDIVVTIVSK		2	1851.01	2	a6.b11 a6.b13	4
a6	pepa6b67	IGQVYEMVYNK	7M:15.99	2	1359.66	4	a6.a1 a6.a2 a6.a3 a6.a4	2
a6	pepa6b68	IGQVYQMVYNK	6Q:0.98 7M:15.99	2	1359.66	1	a6.a7	2
a6	pepa6b69	IGVTDWDTDITVTVVPR		2	1886.99	1	a6.a3	5
a6	pepa6b70	IGVTDWNTDITVTVVPR		2	1886	1	a6.a1	21
a6	pepa6b71	IGVTDWNTDITVTVVPR	7N:0.98	3	1886.99	1	a6.a1	1
a6	pepa6b72	IGVTDWNTDITVTVVPR	6W:15.99	2	1902	1	a6.a1	7
a6	pepa6b73	IGVTDWNTDVTVTVVPR		2	1871.99	1	a6.a2	9
a6	pepa6b74	IGVTDWNTDVTVTVVPR	6W:15.99	3	1887.98	1	a6.a2	2
a6	pepa6b75	IGVTDWNTDVTVTVVPR	6W:15.99 7N:0.98	3	1888.97	1	a6.a2	2
a6	pepa6b76	IGYTYQDMSAADR		2	1490.66	1	a6.a5	9
a6	pepa6b77	IGYTYQDMSAADR	6Q:0.98	2	1491.64	1	a6.a5	1
a6	pepa6b78	IGYTYQDMSAADR	8M:15.99	2	1506.65	1	a6.a5	9
a6	pepa6b79	IGYTYQDMSAADR	6Q:0.98 8M:15.99	2	1507.64	1	a6.a5	2
a6	pepa6b80	IIPITFDASIEK		2	1346.76	1	a6.a4	20
a6	pepa6b81	IIPITFDASIEK	3P:15.99	2	1362.75	1	a6.a4	3
a6	pepa6b82	IIPITFDASIEKE		2	1475.8	1	a6.a4	1
a6	pepa6b83	IIPITFDASIEKER		3	1631.9	1	a6.a4	27
a6	pepa6b84	IIYIGYNSK	7N:0.98	2	1071.57	2	a6.b11 a6.b13	2
a6	pepa6b85	IPSGVTTVTDIGQK		2	1415.77	4	a6.a1 a6.a2 a6.a3 a6.a8	1
a6	pepa6b86	IPTNPIMR		2	941.524	1	a6.a5	8
a6	pepa6b87	IPTNPIMR	7M:15.99	2	957.519	1	a6.a5	9
a6	pepa6b88	IRADDDMYR		3	1154.53	1	a6.a9	2
a6	pepa6b89	IRNTFIYEGK		2	1240.67	5	a6.a1 a6.a2 a6.a3 a6.a4 a6.a7	11
a6	pepa6b90	IRNTFIYEGK	3N:0.98	2	1241.65	5	a6.a1 a6.a2 a6.a3 a6.a4 a6.a7	4
a6	pepa6b91	IRNTFIYEGKR		3	1396.77	5	a6.a1 a6.a2 a6.a3 a6.a4 a6.a7	1
a6	pepa6b92	ISEGVVFEHVR		3	1271.67	2	a6.a2 a6.a7	2
a6	pepa6b93	IVHVEDDDMYR		2	1391.63	1	a6.a3	16
a6	pepa6b94	IVHVEDDDMYR	9M:15.99	2	1407.62	1	a6.a3	12
a6	pepa6b95	IWDVWQTIPDGVTVDGTR		2	2058.03	2	a6.a6 a6.b10	6
a6	pepa6b96	IWDVWQTIPDKVTEDGTR		3	2159.08	1	a6.a5	3
a6	pepa6b97	KIPTNPIMR		2	1069.62	1	a6.a5	4
a6	pepa6b98	KIPTNPIMR	8M:15.99	3	1085.61	1	a6.a5	8
a6	pepa6b99	KMVHVEDDDMYR	2M:15.99	3	1553.67	2	a6.a1 a6.a2	1
a6	pepa6c100	KPAHVVQNDPEYVR		3	1651.86	1	a6.b14	2
a6	pepa6c101	KYNIAYER		2	1056.55	7	a6.a1 a6.a2 a6.a3 a6.a4 a6.a9 a6.b11 a6.b12	6
a6	pepa6c102	MIIYFHEK		2	1080.55	6	a6.a1 a6.a2 a6.a3 a6.a4 a6.a7 a6.a9	2
a6	pepa6c103	MIIYFHEK	1M:15.99	2	1096.55	6	a6.a1 a6.a2 a6.a3 a6.a4 a6.a7 a6.a9	7
a6	pepa6c104	MIIYFHER		2	1108.56	1	a6.a5	12
a6	pepa6c105	MIIYFHER	1M:15.99	2	1124.56	1	a6.a5	10
a6	pepa6c106	MMIYYHER		2	1142.51	2	a6.a6 a6.b10	10
a6	pepa6c107	MMIYYHER	2M:15.99	2	1158.51	2	a6.a6 a6.b10	23
a6	pepa6c108	MMIYYHER	1M:15.99 2M:15.99	3	1174.5	2	a6.a6 a6.b10	1
a6	pepa6c109	MNAIPADDPR		2	1099.52	7	a6.a1 a6.a2 a6.a3 a6.a4 a6.a7 a6.a9 a6.b12	7
a6	pepa6c110	MNAIPADDPR	2N:0.98	2	1100.5	7	a6.a1 a6.a2 a6.a3 a6.a4 a6.a7 a6.a9 a6.b12	1
a6	pepa6c111	MNAIPADDPR	1M:15.99	2	1115.51	7	a6.a1 a6.a2 a6.a3 a6.a4 a6.a7 a6.a9 a6.b12	22
a6	pepa6c112	MNAIPADDPR	1M:15.99 2N:0.98	2	1116.5	7	a6.a1 a6.a2 a6.a3 a6.a4 a6.a7 a6.a9 a6.b12	6
a6	pepa6c113	MVHVEDDDMY	9M:15.99	2	1269.48	2	a6.a1 a6.a2	1
a6	pepa6c114	MVHVEDDDMY	1M:15.99 9M:15.99	2	1285.47	2	a6.a1 a6.a2	1
a6	pepa6c115	MVHVEDDDMYR		2	1409.58	2	a6.a1 a6.a2	18
a6	pepa6c116	MVHVEDDDMYR	1M:15.99	2	1425.58	2	a6.a1 a6.a2	46
a6	pepa6c117	MVHVEDDDMYR	1M:15.99 9M:15.99	2	1441.57	2	a6.a1 a6.a2	46
a6	pepa6c118	MYIYYHER		2	1174.53	3	a6.b11 a6.b13 a6.b14	2
a6	pepa6c119	MYIYYHER	1M:15.99	2	1190.53	3	a6.b11 a6.b13 a6.b14	12
a6	pepa6c120	NTFIYEGK		2	971.483	5	a6.a1 a6.a2 a6.a3 a6.a4 a6.a7	6
a6	pepa6c121	NTFIYEGKR		2	1127.58	5	a6.a1 a6.a2 a6.a3 a6.a4 a6.a7	5
a6	pepa6c122	NTFIYEGKR	1N:0.98	3	1128.57	5	a6.a1 a6.a2 a6.a3 a6.a4 a6.a7	1
a6	pepa6c123	PAHEIANDVEYVNK		2	1598.78	7	a6.a1 a6.a2 a6.a3 a6.a4 a6.a6 a6.a9 a6.b10	15
a6	pepa6c124	PAHEIAQDVEYVNK		3	1612.8	1	a6.a5	2
a6	pepa6c125	PDKITPDGHR		3	1135.59	5	a6.a1 a6.a2 a6.a3 a6.a4 a6.a8	6
a6	pepa6c126	PDKITPDGHR	1P:15.99	3	1151.58	5	a6.a1 a6.a2 a6.a3 a6.a4 a6.a8	1
a6	pepa6c127	PEIMYVR		2	907.471	3	a6.a1 a6.a2 a6.a3	1
a6	pepa6c128	PIFYSHHANVDR		3	1455.71	8	a6.a1 a6.a2 a6.a3 a6.a4 a6.a5 a6.a6 a6.a7 a6.a8	5
a6	pepa6c129	PKVIPITFDASIEK	1P:15.99 5P:15.99	2	1589.88	3	a6.a1 a6.a2 a6.a3	2
a6	pepa6c130	QISEGVVFEHVR	1Q:-17.03	2	1382.71	2	a6.a2 a6.a7	7
a6	pepa6c131	QISEGVVFEHVR		3	1399.73	2	a6.a2 a6.a7	6
a6	pepa6c132	QISEGVVIEHVR	1Q:-17.03	2	1348.72	3	a6.a1 a6.a3 a6.a8	2
a6	pepa6c133	QISEGVVIEHVR		3	1365.75	3	a6.a1 a6.a3 a6.a8	1
a6	pepa6c134	QWHTHCSFCK	1Q:-17.03 6C:57.02 9C:57.02	3	1373.55	4	a6.a1 a6.a2 a6.a3 a6.a4	1
a6	pepa6c135	RAPTAADIR		2	970.543	2	a6.a1 a6.a3	1
a6	pepa6c136	RIGVTDWNTDITVTVVPR		3	2042.1	1	a6.a1	1
a6	pepa6c137	RPAHEIANDVEYS	8N:0.98	3	1501.69	1	a6.b12	1
a6	pepa6c138	RPAHEIANDVEYVN		2	1626.79	7	a6.a1 a6.a2 a6.a3 a6.a4 a6.a6 a6.a9 a6.b10	1
a6	pepa6c139	RPAHEIANDVEYVNK		3	1754.88	7	a6.a1 a6.a2 a6.a3 a6.a4 a6.a6 a6.a9 a6.b10	40
a6	pepa6c140	RPAHEIANDVEYVNK	8N:0.98	3	1755.87	7	a6.a1 a6.a2 a6.a3 a6.a4 a6.a6 a6.a9 a6.b10	27
a6	pepa6c141	RPAHEIANDVEYVNK	2P:15.99	3	1770.88	7	a6.a1 a6.a2 a6.a3 a6.a4 a6.a6 a6.a9 a6.b10	10
a6	pepa6c142	RPAHEIANDVEYVNKY		3	1917.95	7	a6.a1 a6.a2 a6.a3 a6.a4 a6.a6 a6.a9 a6.b10	3
a6	pepa6c143	RPAHEIAQDVEYVNK		3	1768.9	1	a6.a5	16
a6	pepa6c144	RPAHEIAQDVEYVNK	8Q:0.98	3	1769.88	1	a6.a5	2
a6	pepa6c145	RPAHEIAQDVEYVNKY		3	1931.96	1	a6.a5	1
a6	pepa6c146	RPPIPF		2	726.43	1	a6.a5	6
a6	pepa6c147	RPPIPFK		2	854.525	1	a6.a5	7
a6	pepa6c148	SEGVVFEHVR		3	1158.59	2	a6.a2 a6.a7	4
a6	pepa6c149	SGFEFSDIKQDFQ		2	1547.7	1	a6.b11	9
a6	pepa6c150	STSIAIKR		2	875.531	4	a6.a1 a6.a2 a6.a3 a6.a8	5
a6	pepa6c151	SVQCCIPAPR	4C:57.02 5C:57.02	2	1187.57	5	a6.a1 a6.a2 a6.a3 a6.a4 a6.b12	19
a6	pepa6c152	SVQCCIPAPR	3Q:0.98 4C:57.02 5C:57.02	2	1188.55	5	a6.a1 a6.a2 a6.a3 a6.a4 a6.b12	6
a6	pepa6c153	SVQCCIPAPR	4C:57.02 5C:57.02 7P:15.99	2	1203.56	5	a6.a1 a6.a2 a6.a3 a6.a4 a6.b12	2
a6	pepa6c154	SVSESASESDDKFR		3	1543.69	1	a6.b13	2
a6	pepa6c155	SWTFIPWHR		2	1229.62	12	a6.a1 a6.a2 a6.a3 a6.a4 a6.a5 a6.a6 a6.a7 a6.a9 a6.b10 a6.b11 a6.b13 a6.b14	1
a6	pepa6c156	TAYPDNEDMGVFTYAGR	9M:15.99	2	1922.82	5	a6.a1 a6.a2 a6.a3 a6.a4 a6.a8	1
a6	pepa6c157	TEDCCIPEPEREPIIFK	4C:57.02 5C:57.02	3	2133	1	a6.a6	8
a6	pepa6c158	TFDASIEKER		3	1195.6	4	a6.a1 a6.a2 a6.a3 a6.a4	11
a6	pepa6c159	TFIPWHR		2	956.51	12	a6.a1 a6.a2 a6.a3 a6.a4 a6.a5 a6.a6 a6.a7 a6.a9 a6.b10 a6.b11 a6.b13 a6.b14	3
a6	pepa6c160	TFTHIPSGVTTVTDIGQK		3	1902	4	a6.a1 a6.a2 a6.a3 a6.a8	2
a6	pepa6c161	THIPSGVTTVTDIGQK		2	1653.88	4	a6.a1 a6.a2 a6.a3 a6.a8	13
a6	pepa6c162	TIPDKVTIAGNR		2	1284.73	1	a6.b14	6
a6	pepa6c163	TQDCCIPEPK	4C:57.02 5C:57.02	2	1247.54	1	a6.a5	8
a6	pepa6c164	VIPIDYNAIDEAAGVVNTPEEIK		3	2470.27	1	a6.a5	1
a6	pepa6c165	VIPITFDASIEK		2	1332.74	3	a6.a1 a6.a2 a6.a3	9
a6	pepa6c166	VIPITFDASIEKER		3	1617.88	3	a6.a1 a6.a2 a6.a3	18
a6	pepa6c167	VKIPHADYAR		2	1169.64	1	a6.b11	9
a6	pepa6c168	VKIPHSEYAR		3	1199.65	1	a6.b13	1
a6	pepa6c169	VMTINFKPAEDK		2	1392.72	2	a6.a6 a6.b10	15
a6	pepa6c170	VMTINFKPAEDK	2M:15.99	2	1408.71	2	a6.a6 a6.b10	17
a6	pepa6c171	VMTINFKPAEDK	2M:15.99 5N:0.98	3	1409.7	2	a6.a6 a6.b10	3
a6	pepa6c172	VMVPEMMYVR	2M:15.99	2	1270.6	1	a6.a5	1
a6	pepa6c173	VMVPEMMYVR	2M:15.99 6M:15.99 7M:15.99	2	1302.59	1	a6.a5	3
a6	pepa6c174	VPEIMYVR		2	1006.54	3	a6.a1 a6.a2 a6.a3	6
a6	pepa6c175	VPEIMYVR	5M:15.99	2	1022.53	3	a6.a1 a6.a2 a6.a3	32
a6	pepa6c176	VRRPAHEIANDVEYVNK		3	2010.05	7	a6.a1 a6.a2 a6.a3 a6.a4 a6.a6 a6.a9 a6.b10	2
a6	pepa6c177	VRRPAHEIAQDVEYVNK		3	2024.07	1	a6.a5	1
a6	pepa6c178	VSAQEFIGGK		2	1035.55	1	a6.a5	8
a6	pepa6c179	VSAQEFIGGK	4Q:0.98	2	1036.53	1	a6.a5	4
a6	pepa6c180	VSAQEYIGGK		2	1051.54	1	a6.a6	4
a6	pepa6c181	VSAQEYIGGK	4Q:0.98	2	1052.53	1	a6.a6	3
a6	pepa6c182	VSTSNAIGRHPTSFK		3	1601.84	2	a6.a2 a6.a9	2
a6	pepa6c183	VTTVTDIGQK		2	1061.58	4	a6.a1 a6.a2 a6.a3 a6.a8	1
a6	pepa6c184	YENICVMYNQVTTK	5C:57.02	2	1762.81	2	a6.b11 a6.b13	6
a6	pepa6c185	YENICVMYNQVTTK	5C:57.02 7M:15.99	2	1778.81	2	a6.b11 a6.b13	6
a6	pepa6c186	YNIAYER		2	928.452	7	a6.a1 a6.a2 a6.a3 a6.a4 a6.a9 a6.b11 a6.b12	2
a6	pepa6c187	YNIAYK		2	771.404	2	a6.a6 a6.b10	5
a6	pepa6c188	YNIAYKR		2	927.505	2	a6.a6 a6.b10	4
a6	pepa6c189	YNIAYTR		2	900.457	1	a6.a5	9
a6	pepa6c190	YQPMVEADSIWI		2	1451.69	1	a6.a8	1
a6	pepa6c191	YSVNAAIKR		2	1021.58	2	a6.b11 a6.b13	5
a7	pepa7a1	APFPEVFGK		2	991.525	1	a7.a1	6
a7	pepa7a2	APFPEVFGKEK		3	1248.66	1	a7.a1	3
a7	pepa7a3	APSFSDIPNPIGSENSEK		2	1888.89	1	a7.a1	6
a7	pepa7a4	AYFYPEIFR		2	1205.6	1	a7.a1	3
a7	pepa7a5	DAPSFSDIPNPIGSENSEK		2	2003.92	1	a7.a1	14
a7	pepa7a6	DAPSFSDIPNPIGSENSEKTTMPIW	22M:15.99	3	2749.27	1	a7.a1	2
a7	pepa7a7	EGIHAQQKEPMIGVNQEIA	11M:15.99	3	2108.04	1	a7.a1	2
a7	pepa7a8	EGIHAQQKEPMIGVNQEIAY	11M:15.99	3	2271.11	1	a7.a1	1
a7	pepa7a9	EGIHAQQKEPMIGVNQEIAYFYPEIFR	10P:15.99	3	3223.59	1	a7.a1	1
a7	pepa7b10	EIVPNSAEER		2	1143.56	1	a7.a1	6
a7	pepa7b11	FFVAPFPEVFGK		2	1384.73	1	a7.a1	6
a7	pepa7b12	FFVAPFPEVFGKEK		2	1641.87	1	a7.a1	16
a7	pepa7b13	FPEVFGKEK		3	1080.57	1	a7.a1	6
a7	pepa7b14	FSDIPNPIGSENSEK		2	1633.77	1	a7.a1	4
a7	pepa7b15	FVAPFPEVFGK		2	1237.66	1	a7.a1	13
a7	pepa7b16	FVAPFPEVFGKEK		2	1494.8	1	a7.a1	43
a7	pepa7b17	FVAPFPEVFGKEKVNEISK		3	2165.16	1	a7.a1	2
a7	pepa7b18	FYPEIFR		2	971.499	1	a7.a1	3
a7	pepa7b19	GIPQEVINENIIR		2	1494.83	1	a7.a1	7
a7	pepa7b20	GTQYTDAPSFSDIPNPIGSENSEK		2	2554.16	1	a7.a1	8
a7	pepa7b21	GTQYTDAPSFSDIPNPIGSENSEK	8P:15.99	3	2570.15	1	a7.a1	1
a7	pepa7b22	GTQYTDAPSFSDIPNPIGSENSEKTTMPIW	27M:15.99	3	3299.5	1	a7.a1	1
a7	pepa7b23	GYIEQIIR		2	991.557	1	a7.a1	2
a7	pepa7b24	HIQKEDVPSERY		3	1500.74	1	a7.a1	4
a7	pepa7b25	HPIKHQGIPQEV		2	1382.75	1	a7.a1	1
a7	pepa7b26	HPIKHQGIPQEVINENIIR		3	2235.24	1	a7.a1	1
a7	pepa7b27	HQGIPQEVIN		2	1134.59	1	a7.a1	6
a7	pepa7b28	HQGIPQEVINENI		2	1490.76	1	a7.a1	3
a7	pepa7b29	HQGIPQEVINENII		2	1603.84	1	a7.a1	1
a7	pepa7b30	HQGIPQEVINENIIR		2	1759.94	1	a7.a1	24
a7	pepa7b31	IAYFYPEIFR		2	1318.68	1	a7.a1	1
a7	pepa7b32	IGYIEQIIR		2	1104.64	1	a7.a1	3
a7	pepa7b33	IPNPIGSENSEK		2	1284.64	1	a7.a1	3
a7	pepa7b34	IPNPIGSENSEKTTMPIW	15M:15.99	2	2029.99	1	a7.a1	1
a7	pepa7b35	IPQEVINENIIR		2	1437.81	1	a7.a1	1
a7	pepa7b36	KVPQIEIVPNSAEER		3	1708.92	1	a7.a1	1
a7	pepa7b37	KYKVPQIEIVPN		3	1427.83	1	a7.a1	3
a7	pepa7b38	KYKVPQIEIVPNSAEER		3	2000.08	1	a7.a1	1
a7	pepa7b39	NQEIAYFYPEIFR		2	1689.83	1	a7.a1	5
a7	pepa7b40	PFPEVFGKEK		2	1177.63	1	a7.a1	1
a7	pepa7b41	PIGTQYTDAPSFSDIPNPIGSENSEK		3	2764.29	1	a7.a1	1
a7	pepa7b42	PSFSDIPNPIGSENSEKTTMPIW		3	2547.21	1	a7.a1	2
a7	pepa7b43	PSFSDIPNPIGSENSEKTTMPIW	20M:15.99	3	2563.2	1	a7.a1	2
a7	pepa7b44	PSFSDIPNPIGSENSEKTTMPIW	21P:15.99 23W:15.99	3	2579.2	1	a7.a1	2
a7	pepa7b45	PSFSDIPNPIGSENSEKTTMPIW	9P:15.99 14N:0.98 23W:15.99	3	2580.18	1	a7.a1	1
a7	pepa7b46	QEIAYFYPEIFR		2	1575.78	1	a7.a1	1
a7	pepa7b47	QFYQIDAYPSGAW		2	1545.7	1	a7.a1	2
a7	pepa7b48	QGIPQEVINENIIR	1Q:-17.03	2	1605.86	1	a7.a1	4
a7	pepa7b49	QGIPQEVINENIIR		2	1622.89	1	a7.a1	7
a7	pepa7b50	SDIPNPIGSENSEK		2	1486.7	1	a7.a1	6
a7	pepa7b51	TDAPSFSDIPNPIGSENSEK		2	2104.97	1	a7.a1	4
a7	pepa7b52	VAPFPEVFGK		2	1090.59	1	a7.a1	9
a7	pepa7b53	VAPFPEVFGKEK		2	1347.73	1	a7.a1	20
a7	pepa7b54	VAPFPEVFGKEKVNEISK		3	2018.1	1	a7.a1	1
a7	pepa7b55	VPQIEIVPNSAEER		2	1580.83	1	a7.a1	4
a7	pepa7b56	YFYPEIFR		2	1134.56	1	a7.a1	6
a7	pepa7b57	YIGYIEQIIR		2	1267.7	1	a7.a1	10
a7	pepa7b58	YKVPQIEIVPN		2	1299.73	1	a7.a1	5
a7	pepa7b59	YKVPQIEIVPNSAEER		2	1871.99	1	a7.a1	8
a7	pepa7b60	YPEIFR		2	824.43	1	a7.a1	1
a7	pepa7b61	YTDAPSFSDIPNPIGSENSEK		2	2268.03	1	a7.a1	1
a7	pepa7b62	YVPIGTQYTDAPSFSDIPNPIGSENSEK		3	3026.43	1	a7.a1	5
a7	pepa7b63	YVPIGTQYTDAPSFSDIPNPIGSENSEK	12P:15.99	3	3042.42	1	a7.a1	1
a8	pepa8a1	AAKIITHPNFNGNTIDNDIMIIK	8P:15.99 20M:15.99	3	2585.34	1	a8.a1	1
a8	pepa8a2	AAKIITHPNFNGNTIDNDIMIIK	8P:15.99 9N:0.98 20M:15.99	3	2586.32	1	a8.a1	1
a8	pepa8a3	AKIITHPNFNGNTIDNDIMIIK	19M:15.99	3	2498.31	1	a8.a1	3
a8	pepa8a4	AKIITHPNFNGNTIDNDIMIIK	8N:0.98 19M:15.99	3	2499.29	1	a8.a1	2
a8	pepa8a5	ATVSIPR		2	743.441	1	a8.a1	3
a8	pepa8a6	CAAAGTECIISGWGNTK	1C:-17.03|57.02 8C:57.02	2	1778.78	1	a8.a1	3
a8	pepa8a7	EHNIDVIEGNEQFINAAK		3	2041	1	a8.a1	3
a8	pepa8a8	FNGNTIDNDIMIIK	2N:0.98	2	1608.79	1	a8.a1	3
a8	pepa8a9	FNGNTIDNDIMIIK	11M:15.99	2	1623.8	1	a8.a1	4
a8	pepa8b10	FNGNTIDNDIMIIK	2N:0.98 11M:15.99	2	1624.79	1	a8.a1	1
a8	pepa8b11	GNTIDNDIMIIK		2	1346.7	1	a8.a1	1
a8	pepa8b12	GNTIDNDIMIIK	9M:15.99	2	1362.69	1	a8.a1	7
a8	pepa8b13	IDVIEGNEQFINAAK		2	1660.85	1	a8.a1	7
a8	pepa8b14	IGEHNIDVIEGN		2	1309.64	1	a8.a1	3
a8	pepa8b15	IGEHNIDVIEGNEQ		2	1566.74	1	a8.a1	8
a8	pepa8b16	IGEHNIDVIEGNEQF		2	1713.81	1	a8.a1	6
a8	pepa8b17	IGEHNIDVIEGNEQFIN		3	1940.93	1	a8.a1	13
a8	pepa8b18	IGEHNIDVIEGNEQFINA		2	2011.97	1	a8.a1	6
a8	pepa8b19	IGEHNIDVIEGNEQFINAA		2	2083.01	1	a8.a1	7
a8	pepa8b20	IGEHNIDVIEGNEQFINAAK		2	2211.1	1	a8.a1	42
a8	pepa8b21	IGEHNIDVIEGNEQFINAAK	17N:0.98	2	2212.09	1	a8.a1	32
a8	pepa8b22	IGEHNIDVIEGNEQFINAAK	12N:0.98 17N:0.98	2	2213.07	1	a8.a1	1
a8	pepa8b23	IGEHNIDVIEGNEQFINAAKIIT	14Q:0.98	3	2539.3	1	a8.a1	2
a8	pepa8b24	IGEHNIDVIEGNEQFINAAKIIT	14Q:0.98 17N:0.98	2	2540.29	1	a8.a1	3
a8	pepa8b25	IGEHNIDVIEGNEQFINAAKIIT	12N:0.98 14Q:0.98 17N:0.98	3	2541.27	1	a8.a1	1
a8	pepa8b26	IGEHNIDVIEGNEQFINAAKIITHPN	14Q:0.98 17N:0.98 26N:0.98	3	2889.43	1	a8.a1	1
a8	pepa8b27	IIKISSPATINSR		3	1399.83	1	a8.a1	1
a8	pepa8b28	IITHPNFN		2	955.5	1	a8.a1	4
a8	pepa8b29	IITHPNFN	8N:0.98	2	956.484	1	a8.a1	1
a8	pepa8b30	IITHPNFNGN		2	1126.56	1	a8.a1	2
a8	pepa8b31	IITHPNFNGN	8N:0.98	2	1127.55	1	a8.a1	6
a8	pepa8b32	IITHPNFNGNTIDNDIM		2	1928.92	1	a8.a1	1
a8	pepa8b33	IITHPNFNGNTIDNDIM	8N:0.98	2	1929.9	1	a8.a1	1
a8	pepa8b34	IITHPNFNGNTIDNDIM	17M:15.99	2	1944.91	1	a8.a1	2
a8	pepa8b35	IITHPNFNGNTIDNDIM	8N:0.98 17M:15.99	2	1945.9	1	a8.a1	1
a8	pepa8b36	IITHPNFNGNTIDNDIMII	17M:15.99	2	2171.08	1	a8.a1	1
a8	pepa8b37	IITHPNFNGNTIDNDIMIIK		2	2283.18	1	a8.a1	22
a8	pepa8b38	IITHPNFNGNTIDNDIMIIK	8N:0.98	2	2284.16	1	a8.a1	32
a8	pepa8b39	IITHPNFNGNTIDNDIMIIK	8N:0.98 14N:0.98	3	2285.15	1	a8.a1	10
a8	pepa8b40	IITHPNFNGNTIDNDIMIIK	17M:15.99	2	2299.18	1	a8.a1	24
a8	pepa8b41	IITHPNFNGNTIDNDIMIIK	8N:0.98 17M:15.99	2	2300.16	1	a8.a1	51
a8	pepa8b42	IITHPNFNGNTIDNDIMIIK	8N:0.98 14N:0.98 17M:15.99	2	2301.14	1	a8.a1	13
a8	pepa8b43	IITHPNFNGNTIDNDIMIIKIS	17M:15.99	3	2499.29	1	a8.a1	3
a8	pepa8b44	IITHPNFNGNTIDNDIMIIKIS	8N:0.98 17M:15.99	3	2500.28	1	a8.a1	1
a8	pepa8b45	IITHPNFNGNTIDNDIMIIKISS	8N:0.98 14N:0.98	3	2572.3	1	a8.a1	1
a8	pepa8b46	IITHPNFNGNTIDNDIMIIKISSP		3	2667.38	1	a8.a1	1
a8	pepa8b47	IITHPNFNGNTIDNDIMIIKISSP	17M:15.99 24P:15.99	3	2699.37	1	a8.a1	1
a8	pepa8b48	ISSPATINSR		2	1045.56	1	a8.a1	11
a8	pepa8b49	ISSPATINSR	8N:0.98	2	1046.55	1	a8.a1	1
a8	pepa8b50	IVGGYTCAAN	7C:57.02	2	1025.47	1	a8.a1	3
a8	pepa8b51	IVGGYTCAANSIPYQVSINS	7C:57.02	2	2114.02	1	a8.a1	1
a8	pepa8b52	IVGGYTCAANSIPYQVSINSG	7C:57.02	3	2171.04	1	a8.a1	7
a8	pepa8b53	NTIDNDIMIIK		2	1289.68	1	a8.a1	1
a8	pepa8b54	NTIDNDIMIIK	8M:15.99	2	1305.67	1	a8.a1	2
a8	pepa8b55	SSGSSYPSII		2	997.484	1	a8.a1	2
a8	pepa8b56	SSGSSYPSIIQCIK	12C:57.02	2	1526.75	1	a8.a1	5
a8	pepa8b57	TIDNDIMIIK		2	1175.63	1	a8.a1	4
a8	pepa8b58	TIDNDIMIIK	7M:15.99	2	1191.63	1	a8.a1	2
a8	pepa8b59	VATVSIPR		2	842.509	1	a8.a1	38
a8	pepa8b60	VNWIQQTIAAN		2	1257.66	1	a8.a1	1
a9	pepa9a1	AAIATVSIGVIQSK		2	1357.8	1	a9.a1	19
a9	pepa9a2	AAIATVSIGVIQSK	12Q:0.98	2	1358.79	1	a9.a1	5
a9	pepa9a3	AEEIIIPR		2	940.546	1	a9.a1	4
a9	pepa9a4	ATIIQPVASYIK		2	1303.76	1	a9.a1	1
a9	pepa9a5	EFAEIQAPIDR	1E:-18.01 6Q:0.98	3	1271.63	1	a9.a1	1
a9	pepa9a6	EFAEIQAPIDR		2	1288.65	1	a9.a1	14
a9	pepa9a7	EFAEIQAPIDR	6Q:0.98	2	1289.64	1	a9.a1	4
a9	pepa9a8	EFPGSNIIFVTVTDDESR		2	2025.98	1	a9.a1	18
a9	pepa9a9	EFPGSNIIFVTVTDDESRR	1E:-18.01 3P:15.99 6N:0.98	3	2181.05	1	a9.a1	1
a9	pepa9b10	EFPGSNIIFVTVTDDESRR		3	2182.08	1	a9.a1	3
a9	pepa9b11	EINPVWDIAK		2	1184.63	1	a9.a1	8
a9	pepa9b12	EINPVWDIAK	3N:0.98	2	1185.62	1	a9.a1	3
a9	pepa9b13	EINPVWDIAK	6W:15.99	2	1200.63	1	a9.a1	3
a9	pepa9b14	FATIIQPVASYIK		2	1450.83	1	a9.a1	1
a9	pepa9b15	GFATIIQPVASYIK		2	1507.85	1	a9.a1	20
a9	pepa9b16	GFATIIQPVASYIK	7Q:0.98	2	1508.84	1	a9.a1	7
a9	pepa9b17	GRTITEMGITNFVIIEATDR	7M:15.99	2	2253.15	1	a9.a1	1
a9	pepa9b18	GTFSNWPIGVTSR		2	1421.72	1	a9.a1	11
a9	pepa9b19	GTFSNWPIGVTSR	5N:0.98	2	1422.7	1	a9.a1	2
a9	pepa9b20	GTFSNWPIGVTSR	6W:15.99	2	1437.71	1	a9.a1	11
a9	pepa9b21	GTFSNWPIGVTSR	6W:15.99 7P:15.99	2	1453.71	1	a9.a1	5
a9	pepa9b22	GVSVSTEDGATYTAK		2	1485.71	1	a9.a1	1
a9	pepa9b23	GYYPVWQHIER		2	1447.71	1	a9.a1	21
a9	pepa9b24	GYYPVWQHIER	7Q:0.98	3	1448.7	1	a9.a1	2
a9	pepa9b25	GYYPVWQHIER	6W:15.99	2	1463.71	1	a9.a1	4
a9	pepa9b26	GYYPVWQHIER	4P:15.99 6W:15.99	2	1479.7	1	a9.a1	2
a9	pepa9b27	IAYGDWGVSVSTEDGATYTAK		2	2191.02	1	a9.a1	2
a9	pepa9b28	IEAIFEFNMAIYTK	9M:15.99	2	1705.85	1	a9.a1	1
a9	pepa9b29	IIFVTVTDDESR		2	1394.72	1	a9.a1	1
a9	pepa9b30	IRNTDFAGMK		3	1152.58	1	a9.a1	2
a9	pepa9b31	IRNTDFAGMK	3N:0.98	2	1153.57	1	a9.a1	2
a9	pepa9b32	IYFAGEHTSADYNGYIHGAYFTGIDAAK		3	3052.41	1	a9.a1	1
a9	pepa9b33	KMYGPTIPMAEEIIIPR		3	1959.04	1	a9.a1	3
a9	pepa9b34	KMYGPTIPMAEEIIIPR	2M:15.99	2	1975.04	1	a9.a1	16
a9	pepa9b35	KMYGPTIPMAEEIIIPR	2M:15.99 9M:15.99	2	1991.03	1	a9.a1	17
a9	pepa9b36	MYGPTIPMAEEIIIPR		2	1830.95	1	a9.a1	7
a9	pepa9b37	MYGPTIPMAEEIIIPR	1M:15.99	2	1846.94	1	a9.a1	33
a9	pepa9b38	MYGPTIPMAEEIIIPR	1M:15.99 8M:15.99	2	1862.94	1	a9.a1	14
a9	pepa9b39	NTDFAGMKVEMGANWVEGVNGK	7M:15.99 11M:15.99	3	2386.08	1	a9.a1	1
a9	pepa9b40	NTDFAGMKVEMGANWVEGVNGK	7M:15.99 11M:15.99 20N:0.98	3	2387.06	1	a9.a1	2
a9	pepa9b41	NTQPIPTFENFGEDSYFAADPR		2	2516.14	1	a9.a1	18
a9	pepa9b42	NTQPIPTFENFGEDSYFAADPR	3Q:0.98	2	2517.12	1	a9.a1	13
a9	pepa9b43	NTQPIPTFENFGEDSYFAADPR	6P:15.99	3	2532.13	1	a9.a1	6
a9	pepa9b44	PVWQHIER		2	1064.56	1	a9.a1	1
a9	pepa9b45	SISATITANNDDDVSVITAQR		3	2191.08	1	a9.a1	1
a9	pepa9b46	SNWPIGVTSR		2	1116.58	1	a9.a1	1
a9	pepa9b47	TDPGTEFFIYADDSR		2	1733.77	1	a9.a1	19
a9	pepa9b48	TITEMGITNFVIIEATDR	5M:15.99	2	2040.03	1	a9.a1	19
a9	pepa9b49	VEMGANWVEGVNGK		2	1489.71	1	a9.a1	4
a9	pepa9b50	VEMGANWVEGVNGK	12N:0.98	2	1490.69	1	a9.a1	5
a9	pepa9b51	VEMGANWVEGVNGK	3M:15.99	2	1505.71	1	a9.a1	7
a9	pepa9b52	VEMGANWVEGVNGK	3M:15.99 12N:0.98	2	1506.69	1	a9.a1	8
a9	pepa9b53	VEMGANWVEGVNGK	3M:15.99 7W:15.99 12N:0.98	2	1522.68	1	a9.a1	1
a9	pepa9b54	VEMGANWVEGVNGKEINPVWDIAK	3M:15.99 12N:0.98	3	2672.3	1	a9.a1	2
a9	pepa9b55	VTSIKNTQPIPTFENFGEDSYFAADPR	6N:0.98	3	3045.45	1	a9.a1	1
b10	pepb10a1	AVFIKK		2	705.466	1	b10.a1	8
b10	pepb10a2	DGIAWGYYAK		2	1143.55	1	b10.a1	3
b10	pepb10a3	DGIAWGYYAK	5W:15.99	2	1159.54	1	b10.a1	3
b10	pepb10a4	DVGVSPGIIR		2	1012.58	1	b10.a1	11
b10	pepb10a5	ESVKQVGGPAFNVPIGR	1E:-18.01 9P:15.99	3	1752.94	1	b10.a1	2
b10	pepb10a6	ESVKQVGGPAFNVPIGR	5Q:0.98	2	1755.94	1	b10.a1	11
b10	pepb10a7	FATGGAIITSDQEIDQNK		2	1907.93	1	b10.a1	5
b10	pepb10a8	GGPAFNVPIGR		2	1084.59	1	b10.a1	2
b10	pepb10a9	IESGTEIDDPANR		2	1416.66	1	b10.a1	23
b10	pepb10b10	IESGTEIDDPANR	12N:0.98	2	1417.64	1	b10.a1	2
b10	pepb10b11	IIFHDCFVQGCDGSIIIR	6C:57.02 11C:57.02	2	2150.05	1	b10.a1	8
b10	pepb10b12	KDVGVSPGIIR		2	1140.67	1	b10.a1	18
b10	pepb10b13	MSQIVSSPPNTGEVR		2	1601.8	1	b10.a1	13
b10	pepb10b14	MSQIVSSPPNTGEVR	3Q:0.98	2	1602.78	1	b10.a1	9
b10	pepb10b15	MSQIVSSPPNTGEVR	1M:15.99	2	1617.79	1	b10.a1	21
b10	pepb10b16	MSQIVSSPPNTGEVR	1M:15.99 3Q:0.98	2	1618.77	1	b10.a1	9
b10	pepb10b17	MSQIVSSPPNTGEVR	1M:15.99 9P:15.99	2	1633.79	1	b10.a1	3
b10	pepb10b18	MSQIVSSPPNTGEVRR		3	1757.9	1	b10.a1	8
b10	pepb10b19	MSQIVSSPPNTGEVRR	10N:0.98	3	1758.88	1	b10.a1	2
b10	pepb10b20	MSQIVSSPPNTGEVRR	1M:15.99	3	1773.89	1	b10.a1	11
b10	pepb10b21	NFATGGAIITSDQEIDQNK		2	2021.98	1	b10.a1	20
b10	pepb10b22	NFATGGAIITSDQEIDQNK	1N:0.98	2	2022.96	1	b10.a1	15
b10	pepb10b23	NFATGGAIITSDQEIDQNKQAIGIVR		3	2759.43	1	b10.a1	11
b10	pepb10b24	NFATGGAIITSDQEIDQNKQAIGIVR	17Q:0.98	3	2760.42	1	b10.a1	9
b10	pepb10b25	NIDIADIVAISGAHTIGDAGCGAFQNR	21C:57.02	2	2756.34	1	b10.a1	6
b10	pepb10b26	PAFNVPIGR		2	970.547	1	b10.a1	1
b10	pepb10b27	PGVVTCADIVVMAGRESVK	6C:57.02 12M:15.99	2	2004.03	1	b10.a1	2
b10	pepb10b28	QAIGIVR	1Q:-17.03	2	739.446	1	b10.a1	2
b10	pepb10b29	QAIGIVR		2	756.473	1	b10.a1	3
b10	pepb10b30	QVAIDIVDDAK	1Q:-17.03	2	1169.6	1	b10.a1	10
b10	pepb10b31	QVAIDIVDDAK		2	1186.63	1	b10.a1	13
b10	pepb10b32	QVAIDIVDDAK	1Q:0.98	2	1187.62	1	b10.a1	2
b10	pepb10b33	QVGGPAFNVPIGR	1Q:-17.03	2	1294.69	1	b10.a1	8
b10	pepb10b34	QVGGPAFNVPIGR	1Q:-17.03 8N:0.98	2	1295.67	1	b10.a1	6
b10	pepb10b35	QVGGPAFNVPIGR		2	1311.72	1	b10.a1	19
b10	pepb10b36	QVGGPAFNVPIGR	8N:0.98	2	1312.7	1	b10.a1	6
b10	pepb10b37	QVGGPAFNVPIGR	5P:15.99	2	1327.71	1	b10.a1	5
b10	pepb10b38	SCPKAEDIVAQR	2C:57.02	3	1373.68	1	b10.a1	1
b10	pepb10b39	SVKQVGGPAFNVPIGR	8P:15.99	2	1641.91	1	b10.a1	1
b10	pepb10b40	TGIDFFSPTK		2	1112.56	1	b10.a1	12
b10	pepb10b41	TGIDFFSPTKFDNVYYK		2	2041.99	1	b10.a1	10
b10	pepb10b42	TGIDFFSPTKFDNVYYK	13N:0.98	2	2042.97	1	b10.a1	1
b10	pepb10b43	TIGDAGCGAFQNR	7C:57.02	2	1366.62	1	b10.a1	5
b10	pepb10b44	VAVFIKK		2	804.534	1	b10.a1	7
b10	pepb10b45	VCPGVVTCADIVVMAGR	2C:57.02 8C:57.02	2	1803.89	1	b10.a1	22
b10	pepb10b46	VCPGVVTCADIVVMAGR	2C:57.02 8C:57.02 14M:15.99	2	1819.89	1	b10.a1	23
b10	pepb10b47	VCPGVVTCADIVVMAGR	2C:57.02 3P:15.99 8C:57.02 14M:15.99	2	1835.88	1	b10.a1	1
b10	pepb10b48	VQGCDGSIIIR	4C:57.02	2	1217.63	1	b10.a1	1
b10	pepb10b49	VSPGIIR		2	741.462	1	b10.a1	7
b10	pepb10b50	YITNICPTNGATAR	6C:57.02	2	1551.76	1	b10.a1	9
b10	pepb10b51	YITNICPTNGATAR	6C:57.02 9N:0.98	2	1552.74	1	b10.a1	13
b10	pepb10b52	YITNICPTNGATAR	4N:0.98 6C:57.02 9N:0.98	2	1553.73	1	b10.a1	6
b10	pepb10b53	YITNICPTNGATAR	6C:57.02 7P:15.99 9N:0.98	2	1568.74	1	b10.a1	6
b11	pepb11a1	AAIPAGAIAAITPDQAK		2	1578.88	1	b11.a1	8
b11	pepb11a2	AFVATVPNVDSGEVADIIR		2	1973.03	1	b11.a1	5
b11	pepb11a3	AHAIVTYYPI		2	1147.61	1	b11.a1	7
b11	pepb11a4	AHAIVTYYPIGTI		2	1418.77	1	b11.a1	2
b11	pepb11a5	AHAIVTYYPIGTISTM		2	1737.89	1	b11.a1	4
b11	pepb11a6	AHAIVTYYPIGTISTM	16M:15.99	2	1753.88	1	b11.a1	9
b11	pepb11a7	AHAIVTYYPIGTISTMN	16M:15.99	2	1867.93	1	b11.a1	2
b11	pepb11a8	AHAIVTYYPIGTISTMNKPNEPT		3	2518.26	1	b11.a1	1
b11	pepb11a9	AHAIVTYYPIGTISTMNKPNEPT	16M:15.99	3	2534.26	1	b11.a1	5
b11	pepb11b10	AHAIVTYYPIGTISTMNKPNEPTI	16M:15.99	3	2647.34	1	b11.a1	1
b11	pepb11b11	AHAIVTYYPIGTISTMNKPNEPTIA	16M:15.99	3	2718.38	1	b11.a1	1
b11	pepb11b12	AHAIVTYYPIGTISTMNKPNEPTIATTTG	16M:15.99	3	3078.55	1	b11.a1	1
b11	pepb11b13	AIAAITPDQAK		2	1098.62	1	b11.a1	3
b11	pepb11b14	FVATVPNVDSGEVADIIR		2	1902	1	b11.a1	1
b11	pepb11b15	GAIAAITPDQAK		2	1155.64	1	b11.a1	4
b11	pepb11b16	GGVTISTSVSSSR		2	1237.64	1	b11.a1	1
b11	pepb11b17	GVTISTSVSSSR		2	1180.62	1	b11.a1	3
b11	pepb11b18	IIQSTGIDAEFAAK		2	1463.77	1	b11.a1	1
b11	pepb11b19	IITSSGVAAEINSR		2	1417.76	1	b11.a1	2
b11	pepb11b20	IKQIVPGSPSTVTTIIQTTGR	6P:15.99	2	2213.25	1	b11.a1	1
b11	pepb11b21	IQIIQSTGIDAEFAAK		2	1704.92	1	b11.a1	6
b11	pepb11b22	IQYIDIPEIK		2	1231.69	1	b11.a1	4
b11	pepb11b23	ITSSGVAAEINSR		2	1304.68	1	b11.a1	2
b11	pepb11b24	NQIITSSGVAAEINSR		2	1659.87	1	b11.a1	8
b11	pepb11b25	PPGFGTR		2	731.383	1	b11.a1	5
b11	pepb11b26	PSISAMNQIITSSGVAAEINSR		3	2246.14	1	b11.a1	46
b11	pepb11b27	PSISAMNQIITSSGVAAEINSR	8Q:0.98	2	2247.13	1	b11.a1	29
b11	pepb11b28	PSISAMNQIITSSGVAAEINSR	6M:15.99	3	2262.14	1	b11.a1	36
b11	pepb11b29	PSISAMNQIITSSGVAAEINSR	6M:15.99 8Q:0.98	3	2263.12	1	b11.a1	20
b11	pepb11b30	PSISAMNQIITSSGVAAEINSR	1P:15.99 8Q:0.98 20N:0.98	3	2264.11	1	b11.a1	3
b11	pepb11b31	PSISAMNQIITSSGVAAEINSR	1P:15.99 6M:15.99	3	2278.13	1	b11.a1	8
b11	pepb11b32	PSTVTTIIQTTGR		2	1374.76	1	b11.a1	6
b11	pepb11b33	QIITSSGVAAEINSR		2	1545.82	1	b11.a1	1
b11	pepb11b34	QIVPGSPSTVTTIIQTTGR	1Q:-17.03	2	1939.05	1	b11.a1	18
b11	pepb11b35	QIVPGSPSTVTTIIQTTGR		2	1956.08	1	b11.a1	42
b11	pepb11b36	QIVPGSPSTVTTIIQTTGR	15Q:0.98	2	1957.06	1	b11.a1	21
b11	pepb11b37	QIVPGSPSTVTTIIQTTGR	1Q:0.98 15Q:0.98	2	1958.04	1	b11.a1	6
b11	pepb11b38	QIVPGSPSTVTTIIQTTGR	7P:15.99	3	1972.07	1	b11.a1	7
b11	pepb11b39	SPSTVTTIIQTTGR		2	1461.79	1	b11.a1	9
b11	pepb11b40	STGIDAEFAAK		2	1109.55	1	b11.a1	5
b11	pepb11b41	TSSGVAAEINSR		2	1191.6	1	b11.a1	8
b11	pepb11b42	TVPNVDSGEVADIIR		2	1584.82	1	b11.a1	7
b11	pepb11b43	TVTTIIQTTGR		2	1190.67	1	b11.a1	7
b11	pepb11b44	VATVPNVDSGEVADIIR		2	1754.93	1	b11.a1	17
b11	pepb11b45	VATVPNVDSGEVADIIR	6N:0.98	2	1755.91	1	b11.a1	4
b11	pepb11b46	VDSGEVADIIR		2	1173.61	1	b11.a1	4
b11	pepb11b47	VIVPPGFGTR		2	1042.6	1	b11.a1	30
b11	pepb11b48	VPPGFGTR		2	830.452	1	b11.a1	1
b11	pepb11b49	VTISTSVSSSR		2	1123.6	1	b11.a1	1
b11	pepb11b50	YHVFIQYIDIPEIK		2	1777.95	1	b11.a1	12
b12	pepb12a1	AHYIEGEVMR	9M:15.99	3	1220.57	2	b12.a1 b12.a2	1
b12	pepb12a2	EREPFVAATHR		3	1312.68	2	b12.a1 b12.a2	1
b12	pepb12a3	ESANEREPF		2	1078.48	2	b12.a1 b12.a2	1
b12	pepb12a4	ESANEREPFVAATHR	1E:-18.01	3	1695.82	2	b12.a1 b12.a2	1
b12	pepb12a5	ESANEREPFVAATHR		2	1713.83	2	b12.a1 b12.a2	18
b12	pepb12a6	ESANEREPFVAATHR	4N:0.98	3	1714.81	2	b12.a1 b12.a2	8
b12	pepb12a7	ESANEREPFVAATHR	8P:15.99	3	1729.83	2	b12.a1 b12.a2	1
b12	pepb12a8	FKVKPQPPYSAFRE	5P:15.99 6Q:0.98 7P:15.99 8P:15.99	3	1742.87	1	b12.a2	1
b12	pepb12a9	GGPEQVFITIGDR		2	1388.72	2	b12.a1 b12.a2	16
b12	pepb12b10	GGPEQVFITIGDR	5Q:0.98	2	1389.7	2	b12.a1 b12.a2	7
b12	pepb12b11	IGSSNEEFITFYGDFTTPPAPGPDTAIK		3	2972.42	2	b12.a1 b12.a2	9
b12	pepb12b12	IYFYEEDNCAPVYVTIGDGGNR	9C:57.02	2	2552.14	2	b12.a1 b12.a2	14
b12	pepb12b13	KYDIIAKGDEPK		3	1376.74	2	b12.a1 b12.a2	5
b12	pepb12b14	KYDIIAKGDEPKR		3	1532.84	2	b12.a1 b12.a2	1
b12	pepb12b15	MGDFSYADDYQPR	1M:15.99	2	1580.63	2	b12.a1 b12.a2	1
b12	pepb12b16	NAHYIEGEVMR		2	1318.62	2	b12.a1 b12.a2	5
b12	pepb12b17	NAHYIEGEVMR	10M:15.99	2	1334.62	2	b12.a1 b12.a2	11
b12	pepb12b18	NAVEYFAR		2	969.479	1	b12.a1	8
b12	pepb12b19	NAVEYFAR	1N:0.98	2	970.463	1	b12.a1	10
b12	pepb12b20	NCPQPSEPIQPH	2C:57.02	2	1403.64	1	b12.a1	11
b12	pepb12b21	NCPQPSEPIQPH	2C:57.02 10Q:0.98	2	1404.62	1	b12.a1	8
b12	pepb12b22	NCPQPSEPIQPH	2C:57.02 3P:15.99	2	1419.63	1	b12.a1	2
b12	pepb12b23	NCPQPSEPIQPHY	2C:57.02	2	1566.7	1	b12.a1	6
b12	pepb12b24	NCPQPSEPIQPHYSPH	2C:57.02	2	1887.84	1	b12.a1	14
b12	pepb12b25	NCPQPSEPIQPHYSPH	2C:57.02 10Q:0.98	3	1888.83	1	b12.a1	3
b12	pepb12b26	NCPQPSEPIQPHYSPHI	2C:57.02	2	2000.93	1	b12.a1	15
b12	pepb12b27	NCPQPSEPIQPHYSPHI	2C:57.02 4Q:0.98	3	2001.91	1	b12.a1	5
b12	pepb12b28	NCPQPSEPIQPHYSPHII	2C:57.02	3	2114.01	1	b12.a1	8
b12	pepb12b29	NQDEEAVTADVFYITNVHSISK		3	2480.19	2	b12.a1 b12.a2	24
b12	pepb12b30	PVYVTIGDGGNR		2	1247.64	2	b12.a1 b12.a2	1
b12	pepb12b31	QSIDPNSPYAGVETEYTRPDADIDMHIDEPIIAPNPR	1Q:-17.03	3	4119.92	1	b12.a1	3
b12	pepb12b32	QSIDPNSPYAGVETEYTRPDADIDMHIDEPIIAPNPR	1Q:-17.03 25M:15.99	3	4135.92	1	b12.a1	8
b12	pepb12b33	QSIDPNSPYAGVETEYTRPDADIDMHIDEPIIAPNPR	1Q:-17.03 8P:15.99 25M:15.99	3	4151.91	1	b12.a1	3
b12	pepb12b34	RIYFYEEDNCAPVYVTIGDGGNR	10C:57.02	3	2708.24	2	b12.a1 b12.a2	1
b12	pepb12b35	SSNKPMETIVIYSK	6M:15.99	2	1612.83	1	b12.a2	1
b12	pepb12b36	TMETIVIYSK		2	1184.62	1	b12.a1	4
b12	pepb12b37	TMETIVIYSK	2M:15.99	2	1200.62	1	b12.a1	8
b12	pepb12b38	TYGNHEIEYK		2	1253.58	2	b12.a1 b12.a2	5
b12	pepb12b39	VFTYGNHEIEYK		3	1499.72	2	b12.a1 b12.a2	5
b12	pepb12b40	VPFVFTYGNHEIEYK		2	1842.91	1	b12.a1	29
b12	pepb12b41	VPFVFTYGNHEIEYK	9N:0.98	2	1843.89	1	b12.a1	6
b12	pepb12b42	VTPQPPYSAFR		2	1262.65	1	b12.a1	18
b12	pepb12b43	VTPQPPYSAFR	4Q:0.98	2	1263.64	1	b12.a1	3
b12	pepb12b44	VTPQPPYSAFREPS		2	1575.78	1	b12.a1	1
b12	pepb12b45	WIEADISR		2	989.505	1	b12.a1	7
b12	pepb12b46	WIEADISR	1W:15.99	2	1005.5	1	b12.a1	2
b12	pepb12b47	YIEGEVMR		2	996.482	2	b12.a1 b12.a2	4
b12	pepb12b48	YIEGEVMR	7M:15.99	2	1012.48	2	b12.a1 b12.a2	3
b12	pepb12b49	YITNVHSISK		2	1161.63	2	b12.a1 b12.a2	4
b12	pepb12b50	YTYMDYTSGIIHHVTISNIEYNTK		3	2863.36	2	b12.a1 b12.a2	1
b12	pepb12b51	YTYMDYTSGIIHHVTISNIEYNTK	4M:15.99	3	2879.36	2	b12.a1 b12.a2	2
b13	pepb13a1	AINEINQFYQ		2	1239.6	1	b13.a1	1
b13	pepb13a2	AINEINQFYQK		2	1367.7	1	b13.a1	13
b13	pepb13a3	AINEINQFYQK	6N:0.98	2	1368.68	1	b13.a1	4
b13	pepb13a4	AINEINQFYQKFPQ		2	1739.88	1	b13.a1	9
b13	pepb13a5	AINEINQFYQKFPQY		2	1902.94	1	b13.a1	4
b13	pepb13a6	AINEINQFYQKFPQYI		2	2016.02	1	b13.a1	1
b13	pepb13a7	AINEINQFYQKFPQYIQ		2	2144.08	1	b13.a1	3
b13	pepb13a8	AMKPWIQPK		2	1098.61	1	b13.a1	6
b13	pepb13a9	AMKPWIQPK	2M:15.99	2	1114.61	1	b13.a1	4
b13	pepb13b10	AMKPWIQPKTK	2M:15.99	3	1343.75	1	b13.a1	1
b13	pepb13b11	AVPITPTINR		2	1081.64	1	b13.a1	5
b13	pepb13b12	EVKITVDDKHYQK		3	1602.85	1	b13.a1	1
b13	pepb13b13	FAIPQYIK		2	979.561	1	b13.a1	2
b13	pepb13b14	FAIPQYIKT		2	1080.61	1	b13.a1	1
b13	pepb13b15	GPIVINPWDQVKR		3	1521.85	1	b13.a1	4
b13	pepb13b16	INEINQFYQK		2	1296.66	1	b13.a1	2
b13	pepb13b17	ITEEEKNRINF		3	1392.71	1	b13.a1	4
[truncated: 4,082 more rows]

## Sheet: spectra
Group ID	Peptide ID	sample	scan	RT	observed m/z	Sequence (top)	Charge (top)	Modifs (top)	Best E-value	Best hyperscore	delta MH+	delta ppm
a1	pepa1a1	20210219_Jamet_1_3_NP_A11	3661	968.996	716.316	AAFGGSGGRGSSSGGGY	2		3.3e-12	68.4	0.000443881	0.310054
a1	pepa1a1	20210219_Jamet_2_2_NP_B9	3589	973.026	716.313	AAFGGSGGRGSSSGGGY	2		2.4e-05	45.5	-0.00581812	-4.064
a1	pepa1a1	20210219_Jamet_3_1_NP_C7	3620	968.779	716.316	AAFGGSGGRGSSSGGGY	2		1.9e-05	44	0.000840881	0.587362
a1	pepa1a1	20210219_Jamet_3_3_NP_D5	3586	981.596	716.315	AAFGGSGGRGSSSGGGY	2		5.3e-12	60.4	-0.00192012	-1.34122
a1	pepa1a2	20210219_Jamet_1_3_NP_A11	3036	866.984	918.892	AAFGGSGGRGSSSGGGYSSGSS	2		4.7e-07	41.2	0.00183054	0.996606
a1	pepa1a3	20210219_Jamet_1_1_NP_A1	3273	920.761	834.359	AAFGGSGGRGSSSGGGYSSGSSSYGSGGR	3		1e-15	79.5	-0.00372099	-1.48776
a1	pepa1a3	20210219_Jamet_1_2_NP_A6	3321	920.485	834.359	AAFGGSGGRGSSSGGGYSSGSSSYGSGGR	3		8.8e-14	78.5	-0.00378999	-1.51535
a1	pepa1a3	20210219_Jamet_1_3_NP_A11	3405	928.054	834.361	AAFGGSGGRGSSSGGGYSSGSSSYGSGGR	3		4.2e-13	77	0.000823007	0.329062
a1	pepa1a3	20210219_Jamet_1_3_NP_A11	4370	1079.4	834.689	AAFGGSGGRGSSSGGGYSSGSSSYGSGGR	3		8.4e-10	57.5	0.984583	-7.50553
a1	pepa1a3	20210219_Jamet_2_1_NP_B4	3439	933.077	834.361	AAFGGSGGRGSSSGGGYSSGSSSYGSGGR	3		1.9e-15	80.4	0.00183601	0.734089
a1	pepa1a3	20210219_Jamet_2_2_NP_B9	3314	929.901	834.361	AAFGGSGGRGSSSGGGYSSGSSSYGSGGR	3		1e-11	70.7	0.00114401	0.457407
a1	pepa1a3	20210219_Jamet_2_3_NP_C2	3341	944.282	834.36	AAFGGSGGRGSSSGGGYSSGSSSYGSGGR	3		6.5e-11	71.2	-0.000768993	-0.307466
a1	pepa1a3	20210219_Jamet_3_1_NP_C7	3334	922.213	834.359	AAFGGSGGRGSSSGGGYSSGSSSYGSGGR	3		3.6e-09	67.4	-0.00469899	-1.8788
a1	pepa1a3	20210219_Jamet_3_2_NP_C12	3343	934.102	834.36	AAFGGSGGRGSSSGGGYSSGSSSYGSGGR	3		3.3e-14	77.2	-0.00262099	-1.04795
a1	pepa1a3	20210219_Jamet_3_3_NP_D5	3338	940.606	834.36	AAFGGSGGRGSSSGGGYSSGSSSYGSGGR	3		8.9e-13	68.5	-0.00240199	-0.960387
a1	pepa1a4	20210219_Jamet_1_1_NP_A1	11823	2260.54	704.356	ADTLTDEINFLR	2		1.4e-06	40.2	-0.00594487	-4.22307
a1	pepa1a4	20210219_Jamet_1_2_NP_A6	13283	2247.97	704.359	ADTLTDEINFLR	2		8.1e-07	40.2	-0.00117587	-0.835304
a1	pepa1a4	20210219_Jamet_1_3_NP_A11	11735	2264.34	704.36	ADTLTDEINFLR	2		1.6e-06	40.2	0.000763133	0.542109
a1	pepa1a4	20210219_Jamet_2_1_NP_B4	11806	2263.91	704.36	ADTLTDEINFLR	2		1.9e-05	31.6	0.000626133	0.444788
a1	pepa1a4	20210219_Jamet_2_2_NP_B9	12294	2255.61	704.36	ADTLTDEINFLR	2		2.4e-07	40.2	0.00120613	0.856804
a1	pepa1a4	20210219_Jamet_2_3_NP_C2	12032	2261.74	704.359	ADTLTDEINFLR	2		6e-06	40.2	8.91333e-05	0.0633179
a1	pepa1a4	20210219_Jamet_3_1_NP_C7	11713	2259.33	704.358	ADTLTDEINFLR	2		6.9e-06	36.3	-0.00182187	-1.2942
a1	pepa1a4	20210219_Jamet_3_1_NP_C7	11759	2267.87	469.908	ADTLTDEINFLR	3		5.3e-07	38.5	-0.00139087	-0.988034
a1	pepa1a4	20210219_Jamet_3_1_NP_C7	11963	2309.77	704.355	ADTLTDEINFLR	2		1.3e-05	37.9	-0.00916987	-6.51402
a1	pepa1a4	20210219_Jamet_3_2_NP_C12	11813	2262.77	704.359	ADTLTDEINFLR	2		2.2e-05	36.3	-0.000249867	-0.177499
a1	pepa1a4	20210219_Jamet_3_3_NP_D5	11406	2267.54	704.356	ADTLTDEINFLR	2		1.8e-05	36.3	-0.00716887	-5.09257
a1	pepa1a5	20210219_Jamet_3_1_NP_C7	11177	2154.55	704.845	ADTLTDEINFLR	2	9N:0.98	1.7e-06	37.9	-0.0129254	-9.17547
a1	pepa1a6	20210219_Jamet_1_1_NP_A1	4348	1082.12	562.283	AEAEALYQTK	2		0.002	33	-0.00469472	-4.17843
a1	pepa1a6	20210219_Jamet_1_2_NP_A6	4408	1077.78	562.282	AEAEALYQTK	2		0.0057	33	-0.00539772	-4.80411
a1	pepa1a6	20210219_Jamet_2_1_NP_B4	4465	1088.4	562.282	AEAEALYQTK	2		0.0035	33.1	-0.00661772	-5.88995
a1	pepa1a6	20210219_Jamet_2_3_NP_C2	4292	1086.64	562.284	AEAEALYQTK	2		0.0059	30.6	-0.00246072	-2.19011
a1	pepa1a6	20210219_Jamet_3_1_NP_C7	4343	1081.43	562.283	AEAEALYQTK	2		0.0019	33	-0.00417172	-3.71294
a1	pepa1a6	20210219_Jamet_3_2_NP_C12	4323	1084	562.283	AEAEALYQTK	2		0.0055	33	-0.00352772	-3.13977
a1	pepa1a6	20210219_Jamet_3_3_NP_D5	4281	1089.07	562.283	AEAEALYQTK	2		0.0075	30.6	-0.00503372	-4.48014
a1	pepa1a7	20210219_Jamet_1_2_NP_A6	3843	999.005	563.275	AEAESLYQSK	2		0.0014	28.8	-0.00031328	-0.278337
a1	pepa1a7	20210219_Jamet_1_3_NP_A11	3796	989.658	563.274	AEAESLYQSK	2		0.0053	28.8	-0.00161128	-1.43156
a1	pepa1a7	20210219_Jamet_3_2_NP_C12	3750	998.151	563.273	AEAESLYQSK	2		0.0034	28.8	-0.00350728	-3.11608
a1	pepa1a7	20210219_Jamet_3_3_NP_D5	3695	999.001	563.275	AEAESLYQSK	2		0.0034	28.8	-0.00051928	-0.461359
a1	pepa1a8	20210219_Jamet_3_1_NP_C7	4078	1040.7	563.767	AEAESLYQSK	2	8Q:0.98	0.00031	32.3	-0.000422862	-0.375368
a1	pepa1a9	20210219_Jamet_1_3_NP_A11	8575	1699.3	830.388	AEAESLYQSKYEEL	2		0.00087	31.9	-0.00521297	-3.14077
a1	pepa1b10	20210219_Jamet_1_1_NP_A1	8717	1718.43	762.71	AEAESLYQSKYEELQITAGR	3		1.4e-13	67.3	-0.0100745	-4.40678
a1	pepa1b10	20210219_Jamet_1_1_NP_A1	8726	1720	1143.56	AEAESLYQSKYEELQITAGR	2		1e-15	102	-0.00991446	-4.3368
a1	pepa1b10	20210219_Jamet_1_2_NP_A6	9531	1714.81	762.714	AEAESLYQSKYEELQITAGR	3		1.1e-11	64.9	0.00115654	0.505896
a1	pepa1b10	20210219_Jamet_1_2_NP_A6	9578	1720.56	1143.57	AEAESLYQSKYEELQITAGR	2		1e-15	91.7	0.00440854	1.92839
a1	pepa1b10	20210219_Jamet_1_3_NP_A11	8750	1726.37	762.711	AEAESLYQSKYEELQITAGR	3		9.8e-12	64.9	-0.00679846	-2.97379
a1	pepa1b10	20210219_Jamet_1_3_NP_A11	8771	1729.97	1143.56	AEAESLYQSKYEELQITAGR	2		1e-15	100.5	-0.00690846	-3.02191
a1	pepa1b10	20210219_Jamet_2_1_NP_B4	8691	1720.55	762.707	AEAESLYQSKYEELQITAGR	3		5.2e-12	66.2	-0.0168935	-7.38956
a1	pepa1b10	20210219_Jamet_2_2_NP_B9	8848	1714.59	762.711	AEAESLYQSKYEELQITAGR	3		3.9e-13	67.3	-0.00620846	-2.71571
a1	pepa1b10	20210219_Jamet_2_2_NP_B9	8863	1716.83	1143.57	AEAESLYQSKYEELQITAGR	2		1e-15	90.4	-0.000768459	-0.33614
a1	pepa1b10	20210219_Jamet_2_3_NP_C2	8741	1721.36	762.712	AEAESLYQSKYEELQITAGR	3		3e-11	55.3	-0.00243946	-1.06707
a1	pepa1b10	20210219_Jamet_2_3_NP_C2	8759	1724.11	1143.57	AEAESLYQSKYEELQITAGR	2		1e-15	97.1	0.00342054	1.49622
a1	pepa1b10	20210219_Jamet_3_1_NP_C7	8653	1718.02	762.71	AEAESLYQSKYEELQITAGR	3		2.6e-12	62.1	-0.00943446	-4.12683
a1	pepa1b10	20210219_Jamet_3_1_NP_C7	8682	1722.67	1143.57	AEAESLYQSKYEELQITAGR	2		1e-15	115.9	0.00126554	0.553575
a1	pepa1b10	20210219_Jamet_3_2_NP_C12	8594	1711.12	762.712	AEAESLYQSKYEELQITAGR	3		6.5e-13	67.3	-0.00487446	-2.13219
a1	pepa1b10	20210219_Jamet_3_2_NP_C12	8609	1713.45	1143.57	AEAESLYQSKYEELQITAGR	2		1e-15	92	0.00184454	0.806842
a1	pepa1b10	20210219_Jamet_3_3_NP_D5	8491	1736.56	762.71	AEAESLYQSKYEELQITAGR	3		7.2e-14	67.3	-0.00803046	-3.51269
a1	pepa1b10	20210219_Jamet_3_3_NP_D5	8505	1738.86	1143.56	AEAESLYQSKYEELQITAGR	2		1e-15	102	-0.00768546	-3.36178
a1	pepa1b11	20210219_Jamet_1_1_NP_A1	9053	1771.72	763.039	AEAESLYQSKYEELQITAGR	3	15Q:0.98	1.3e-11	61.5	-0.00641404	-2.80443
a1	pepa1b12	20210219_Jamet_1_2_NP_A6	5811	1255.8	606.782	AEAESWYQTK	2		0.0084	30.5	0.00260868	2.1514
a1	pepa1b12	20210219_Jamet_3_1_NP_C7	5539	1260.87	606.781	AEAESWYQTK	2		0.0088	30.5	0.00241368	1.99058
a1	pepa1b12	20210219_Jamet_3_2_NP_C12	5553	1267.82	606.781	AEAESWYQTK	2		0.0038	30.5	0.00171968	1.41823
a1	pepa1b12	20210219_Jamet_3_3_NP_D5	5527	1283.89	606.781	AEAESWYQTK	2		0.0016	30.5	0.000584683	0.482192
a1	pepa1b13	20210219_Jamet_2_2_NP_B9	9532	1812.67	787.047	AEAESWYQTKYEELQVTAGR	3		5.4e-10	45.4	0.00595857	2.52576
a1	pepa1b14	20210219_Jamet_2_1_NP_B4	4500	1095.42	514.227	AEAESWYR	2	6W:15.99	0.0036	30.8	-0.00172397	-1.67791
a1	pepa1b15	20210219_Jamet_1_1_NP_A1	6981	1460.92	525.775	AENEFVTLK	2		0.00023	30	-0.00360438	-3.43096
a1	pepa1b15	20210219_Jamet_3_1_NP_C7	6934	1463.13	525.777	AENEFVTIK	2		0.002	27.8	-0.000398384	-0.379216
a1	pepa1b16	20210219_Jamet_1_1_NP_A1	3028	878.148	810.681	AFGGSGGRGSSSGGGYSSGSSSYGSGGR	3		1.4e-13	73.3	-0.000455208	-0.187326
a1	pepa1b16	20210219_Jamet_1_3_NP_A11	3169	888.274	810.682	AFGGSGGRGSSSGGGYSSGSSSYGSGGR	3		1e-15	92.3	0.000515792	0.212258
a1	pepa1b16	20210219_Jamet_2_1_NP_B4	3164	888.442	810.681	AFGGSGGRGSSSGGGYSSGSSSYGSGGR	3		1e-13	56.6	-0.00220021	-0.905424
a1	pepa1b16	20210219_Jamet_2_2_NP_B9	3065	886.819	810.682	AFGGSGGRGSSSGGGYSSGSSSYGSGGR	3		1.5e-15	77	0.00184179	0.75793
a1	pepa1b16	20210219_Jamet_2_3_NP_C2	3105	901.013	810.68	AFGGSGGRGSSSGGGYSSGSSSYGSGGR	3		1e-15	79.2	-0.00344921	-1.41941
a1	pepa1b16	20210219_Jamet_3_1_NP_C7	3150	891.521	810.682	AFGGSGGRGSSSGGGYSSGSSSYGSGGR	3		1e-15	83.6	-4.20786e-06	-0.00173161
a1	pepa1b16	20210219_Jamet_3_2_NP_C12	3123	896.427	810.682	AFGGSGGRGSSSGGGYSSGSSSYGSGGR	3		1.7e-13	72.6	0.000898792	0.369869
a1	pepa1b16	20210219_Jamet_3_3_NP_D5	3114	900.117	810.681	AFGGSGGRGSSSGGGYSSGSSSYGSGGR	3		2e-15	79.3	-0.00130821	-0.53835
a1	pepa1b17	20210219_Jamet_2_1_NP_B4	7780	1582.18	424.751	AFIDKVR	2		0.0021	34.4	-0.00357884	-4.21785
a1	pepa1b18	20210219_Jamet_2_1_NP_B4	5944	1307.8	409.185	AFSCISACGPR	3	4C:57.02 8C:57.02	0.0015	27.8	-0.00455592	-3.71746
a1	pepa1b18	20210219_Jamet_2_1_NP_B4	6049	1324.76	613.274	AFSCISACGPR	2	4C:57.02 8C:57.02	4.6e-06	40.7	-0.00388092	-3.16669
a1	pepa1b19	20210219_Jamet_2_1_NP_B4	5026	1179.09	512.579	AFSCISACGPRPGR	3	4C:57.02 8C:57.02	0.00087	30	0.000437486	0.284873
a1	pepa1b19	20210219_Jamet_2_1_NP_B4	5203	1204.5	768.366	AFSCISACGPRPGR	2	4C:57.02 8C:57.02	1.3e-11	69.7	0.00334849	2.1804
a1	pepa1b19	20210219_Jamet_2_1_NP_B4	5455	1240.07	512.579	AFSCISACGPRPGR	3	4C:57.02 8C:57.02	4.6e-06	36.2	0.000473486	0.308315
a1	pepa1b20	20210219_Jamet_1_1_NP_A1	6283	1359.78	626.796	AGGGGGFGAAGGFGGR	2		1e-10	64.2	0.00269989	2.15546
a1	pepa1b20	20210219_Jamet_1_2_NP_A6	6686	1362.97	626.796	AGGGGGFGAAGGFGGR	2		6.1e-09	54.9	0.00269289	2.14987
a1	pepa1b20	20210219_Jamet_1_3_NP_A11	6345	1366.15	626.795	AGGGGGFGAAGGFGGR	2		7.4e-12	64.2	0.000965894	0.771122
a1	pepa1b20	20210219_Jamet_2_1_NP_B4	6357	1369.95	626.794	AGGGGGFGAAGGFGGR	2		2.6e-10	60.8	-0.000722106	-0.576494
a1	pepa1b20	20210219_Jamet_2_3_NP_C2	6291	1371.89	626.795	AGGGGGFGAAGGFGGR	2		9.3e-12	64.2	0.00176889	1.4122
a1	pepa1b20	20210219_Jamet_3_1_NP_C7	6287	1366.42	626.793	AGGGGGFGAAGGFGGR	2		1.7e-11	64.2	-0.00256811	-2.05025
a1	pepa1b20	20210219_Jamet_3_2_NP_C12	6257	1366.94	626.793	AGGGGGFGAAGGFGGR	2		1.1e-09	57.6	-0.00383511	-3.06176
a1	pepa1b20	20210219_Jamet_3_3_NP_D5	6207	1383.73	626.795	AGGGGGFGAAGGFGGR	2		1.7e-10	62.3	0.00121289	0.968315
a1	pepa1b21	20210219_Jamet_1_1_NP_A1	10152	1949.23	582.813	ALDIEIATYR	2		3.1e-05	37.1	-0.00639234	-5.48875
a1	pepa1b21	20210219_Jamet_1_2_NP_A6	11238	1942.59	582.817	ALDIEIATYR	2		5.7e-05	37.1	0.000480665	0.41272
a1	pepa1b21	20210219_Jamet_1_3_NP_A11	10126	1954.96	582.816	ALDLEIATYR	2		5.3e-05	37.2	-0.00189634	-1.62828
a1	pepa1b21	20210219_Jamet_2_2_NP_B9	10442	1951.57	582.817	ALDIEIATYR	2		7.7e-05	34.6	0.00176666	1.51694
a1	pepa1b21	20210219_Jamet_2_3_NP_C2	10287	1958.8	583.317	ALDLEIATYR	2		1.4e-05	36.8	1.00172	-1.40747
a1	pepa1b21	20210219_Jamet_3_1_NP_C7	10068	1949.02	582.815	ALDIEIATYR	2		1.1e-05	40.9	-0.00329634	-2.83038
a1	pepa1b21	20210219_Jamet_3_2_NP_C12	10079	1947.34	582.816	ALDLEIATYR	2		2.6e-05	37	-0.00162534	-1.39559
a1	pepa1b21	20210219_Jamet_3_3_NP_D5	9838	1965.09	582.814	ALDIEIATYR	2		1.5e-05	34.6	-0.00519134	-4.45751
a1	pepa1b22	20210219_Jamet_1_1_NP_A1	6545	1398.07	553.279	AIGGGLSSVGGGSS	2		0.0043	24	0.00188171	1.70206
a1	pepa1b22	20210219_Jamet_1_3_NP_A11	6595	1404.48	553.276	AIGGGLSSVGGGSS	2		0.0017	26.8	-0.00303229	-2.74279
a1	pepa1b23	20210219_Jamet_1_1_NP_A1	6519	1394.3	724.389	AIGGGLSSVGGGSSTIK	2		7.4e-11	64.5	-0.00358575	-2.47673
a1	pepa1b23	20210219_Jamet_1_2_NP_A6	6958	1394.61	724.392	AIGGGLSSVGGGSSTIK	2		4.7e-11	64.5	0.00249825	1.72558
a1	pepa1b23	20210219_Jamet_1_3_NP_A11	6582	1402.27	724.39	AIGGGLSSVGGGSSTIK	2		1.9e-10	64.5	-0.00307875	-2.12654
a1	pepa1b23	20210219_Jamet_2_1_NP_B4	6589	1404.24	724.388	AIGGGLSSVGGGSSTIK	2		8.5e-12	64.5	-0.00670175	-4.629
a1	pepa1b23	20210219_Jamet_2_2_NP_B9	6624	1404.4	724.389	AIGGGLSSVGGGSSTIK	2		5e-11	64.5	-0.00363275	-2.5092
a1	pepa1b23	20210219_Jamet_2_3_NP_C2	6525	1404.13	724.39	AIGGGLSSVGGGSSTIK	2		1.4e-09	64.5	-0.00164975	-1.13951
a1	pepa1b23	20210219_Jamet_3_1_NP_C7	6447	1390.63	724.389	AIGGGLSSVGGGSSTIK	2		4.2e-11	64.5	-0.00388075	-2.68049
a1	pepa1b23	20210219_Jamet_3_1_NP_C7	6536	1403.85	483.262	AIGGGLSSVGGGSSTIK	3		5.3e-08	45.8	-0.00255875	-1.76737
a1	pepa1b23	20210219_Jamet_3_1_NP_C7	6848	1448.91	724.389	AIGGGLSSVGGGSSTIK	2		2.4e-11	52.5	-0.00424575	-2.93261
a1	pepa1b23	20210219_Jamet_3_2_NP_C12	6484	1401.18	724.39	AIGGGLSSVGGGSSTIK	2		2.9e-11	64.4	-0.00319975	-2.21012
a1	pepa1b23	20210219_Jamet_3_3_NP_D5	6438	1419.33	724.391	AIGGGLSSVGGGSSTIK	2		2e-10	64.5	0.000518246	0.35796
a1	pepa1b24	20210219_Jamet_1_1_NP_A1	8403	1670.66	805.923	AIGGGLSSVGGGSSTIKY	2		2e-11	64.5	0.00124171	0.770848
a1	pepa1b24	20210219_Jamet_1_3_NP_A11	8402	1674.13	805.922	AIGGGLSSVGGGSSTIKY	2		2.4e-12	69	-0.00143029	-0.887915
a1	pepa1b24	20210219_Jamet_2_1_NP_B4	8396	1675.05	805.917	AIGGGLSSVGGGSSTIKY	2		2.7e-13	61.8	-0.0108593	-6.74139
a1	pepa1b24	20210219_Jamet_2_2_NP_B9	8513	1667.19	805.919	AIGGGLSSVGGGSSTIKY	2		2.2e-10	64.4	-0.00716129	-4.44569
a1	pepa1b24	20210219_Jamet_2_3_NP_C2	8384	1670.62	805.917	AIGGGLSSVGGGSSTIKY	2		1.2e-09	52.3	-0.0115273	-7.15608
a1	pepa1b24	20210219_Jamet_3_1_NP_C7	8431	1683.53	805.922	AIGGGLSSVGGGSSTIKY	2		3.1e-12	60.1	-0.00139429	-0.865567
a1	pepa1b24	20210219_Jamet_3_2_NP_C12	8293	1667.11	805.921	AIGGGLSSVGGGSSTIKY	2		3.2e-10	69	-0.00355529	-2.2071
a1	pepa1b24	20210219_Jamet_3_3_NP_D5	8195	1690.42	805.921	AIGGGLSSVGGGSSTIKY	2		1e-08	55.2	-0.00435529	-2.70374
a1	pepa1b25	20210219_Jamet_1_1_NP_A1	8053	1617.2	856.447	AIGGGLSSVGGGSSTIKYT	2		4e-08	42.7	0.000532242	0.31091
a1	pepa1b25	20210219_Jamet_1_3_NP_A11	8060	1620.84	856.444	AIGGGLSSVGGGSSTIKYT	2		2.9e-10	61.1	-0.00447376	-2.61335
a1	pepa1b26	20210219_Jamet_1_3_NP_A11	8087	1625.1	957.491	AIGGGLSSVGGGSSTIKYTTT	2		2.4e-10	63	-0.0063477	-3.31649
a1	pepa1b26	20210219_Jamet_3_1_NP_C7	8035	1624.39	957.491	AIGGGLSSVGGGSSTIKYTTT	2		9.2e-09	50.1	-0.0058387	-3.05055
a1	pepa1b27	20210219_Jamet_1_3_NP_A11	7964	1606.69	1001.01	AIGGGLSSVGGGSSTIKYTTTS	2		2e-10	62.8	-0.000459102	-0.229435
a1	pepa1b27	20210219_Jamet_3_2_NP_C12	7857	1602.68	1001.01	AIGGGLSSVGGGSSTIKYTTTS	2		2.1e-06	39.5	-0.000268102	-0.133983
a1	pepa1b28	20210219_Jamet_1_3_NP_A11	7890	1596.54	1044.53	AIGGGLSSVGGGSSTIKYTTTSS	2		6.3e-11	51.3	-0.000998507	-0.478202
a1	pepa1b29	20210219_Jamet_1_1_NP_A1	6674	1416.05	806.742	AIGGGLSSVGGGSSTIKYTTTSSSSR	3		1e-15	93.1	0.000378657	0.156586
a1	pepa1b29	20210219_Jamet_1_3_NP_A11	6718	1422.18	806.74	AIGGGLSSVGGGSSTIKYTTTSSSSR	3		1e-15	99.8	-0.00450534	-1.86309
a1	pepa1b29	20210219_Jamet_2_1_NP_B4	6737	1425.76	806.74	AIGGGLSSVGGGSSTIKYTTTSSSSR	3		1e-15	92.5	-0.00668234	-2.76334
a1	pepa1b29	20210219_Jamet_2_2_NP_B9	6733	1418.82	806.741	AIGGGLSSVGGGSSTIKYTTTSSSSR	3		1e-15	109	-0.00238134	-0.984754
a1	pepa1b29	20210219_Jamet_2_3_NP_C2	6632	1418.84	806.742	AIGGGLSSVGGGSSTIKYTTTSSSSR	3		1e-15	98.5	0.00118766	0.491131
a1	pepa1b29	20210219_Jamet_3_1_NP_C7	6681	1424.9	806.741	AIGGGLSSVGGGSSTIKYTTTSSSSR	3		1e-15	106.3	-0.00239234	-0.989303
a1	pepa1b29	20210219_Jamet_3_2_NP_C12	6617	1419.86	806.742	AIGGGLSSVGGGSSTIKYTTTSSSSR	3		1e-15	97.2	0.00222466	0.91996
a1	pepa1b29	20210219_Jamet_3_3_NP_D5	6561	1437.1	806.744	AIGGGLSSVGGGSSTIKYTTTSSSSR	3		1e-15	101.4	0.00621166	2.5687
a1	pepa1b30	20210219_Jamet_1_2_NP_A6	13333	2256.49	1013.48	ALYDAELSQMQTHISDTSVVLSMDNNR	3		1e-15	81.4	0.00382778	1.25979
a1	pepa1b30	20210219_Jamet_3_1_NP_C7	11833	2282.12	1013.48	ALYDAELSQMQTHISDTSVVLSMDNNR	3		6.7e-14	71.9	-0.00589122	-1.93891
a1	pepa1b31	20210219_Jamet_1_2_NP_A6	12499	2127.13	1018.81	ALYDAELSQMQTHISDTSVVLSMDNNR	3	23M:15.99	3e-12	71.7	0.00187016	0.612282
a1	pepa1b31	20210219_Jamet_3_1_NP_C7	10179	1968.64	1018.81	ALYDAELSQMQTHISDTSVVLSMDNNR	3	10M:15.99	1.5e-12	79.7	-0.00915984	-2.99888
a1	pepa1b31	20210219_Jamet_3_1_NP_C7	11089	2136.85	1018.81	ALYDAELSQMQTHISDTSVVLSMDNNR	3	23M:15.99	8.4e-13	72.9	-0.00867484	-2.8401
a1	pepa1b31	20210219_Jamet_3_2_NP_C12	11149	2138.12	1018.81	ALYDAELSQMQTHISDTSVVLSMDNNR	3	23M:15.99	1.9e-13	61.9	-0.0105218	-3.4448
a1	pepa1b32	20210219_Jamet_1_1_NP_A1	9261	1803.22	1024.14	ALYDAELSQMQTHISDTSVVLSMDNNR	3	10M:15.99 23M:15.99	2.7e-11	62.6	-0.00482546	-1.5716
a1	pepa1b32	20210219_Jamet_1_2_NP_A6	10205	1801.26	1024.14	ALYDAELSQMQTHISDTSVVLSMDNNR	3	10M:15.99 23M:15.99	3.4e-11	64.9	0.00527854	1.71917
a1	pepa1b32	20210219_Jamet_2_1_NP_B4	9203	1801.62	1024.14	ALYDAELSQMQTHISDTSVVLSMDNNR	3	10M:15.99 23M:15.99	4.2e-10	60.5	-0.00918146	-2.9903
a1	pepa1b32	20210219_Jamet_2_3_NP_C2	9305	1806.32	1024.14	ALYDAELSQMQTHISDTSVVLSMDNNR	3	10M:15.99 23M:15.99	1.4e-13	66.8	0.00594754	1.93705
a1	pepa1b32	20210219_Jamet_3_1_NP_C7	9150	1796.2	1024.14	ALYDAELSQMQTHISDTSVVLSMDNNR	3	10M:15.99 23M:15.99	3e-10	63.5	-0.00266146	-0.866808
a1	pepa1b32	20210219_Jamet_3_2_NP_C12	9119	1791.99	1024.14	ALYDAELSQMQTHISDTSVVLSMDNNR	3	10M:15.99 23M:15.99	5.1e-15	73	-0.00375646	-1.22344
a1	pepa1b32	20210219_Jamet_3_3_NP_D5	8992	1819.02	1024.14	ALYDAELSQMQTHISDTSVVLSMDNNR	3	10M:15.99 23M:15.99	8.7e-11	53.9	0.000739543	0.240862
a1	pepa1b33	20210219_Jamet_2_1_NP_B4	11220	2149.97	743.374	AKLEAAVAEAEQQGEAALSDAR	3		2.8e-12	66.6	-0.0064434	-2.89186
a1	pepa1b33	20210219_Jamet_2_1_NP_B4	11269	2158.28	1114.56	AKLEAAVAEAEQQGEAALSDAR	2		1e-15	115.5	-0.0075594	-3.39273
a1	pepa1b33	20210219_Jamet_2_1_NP_B4	11486	2200.39	743.375	AKLEAAVAEAEQQGEAALSDAR	3		2e-13	63.4	-0.0035594	-1.5975
a1	pepa1b34	20210219_Jamet_2_1_NP_B4	5830	1292.3	393.206	AKQDMACLLK	3	7C:57.02	0.00054	31.8	-0.00276755	-2.35014
a1	pepa1b34	20210219_Jamet_2_1_NP_B4	5832	1292.44	589.306	AKQDMACLLK	2	7C:57.02	1.8e-06	49.4	-0.00202755	-1.72175
a1	pepa1b35	20210219_Jamet_2_1_NP_B4	5597	1260.61	402.543	AKQDMACLIR	3	7C:57.02	2.1e-06	38	0.000294444	0.244228
a1	pepa1b35	20210219_Jamet_2_1_NP_B4	5602	1261.33	603.311	AKQDMACLIR	2	7C:57.02	2.7e-05	40	0.00122144	1.01313
a1	pepa1b36	20210219_Jamet_2_1_NP_B4	6193	1345.72	402.87	AKQDMACLIR	3	3Q:0.98 7C:57.02	0.0073	29.1	-0.000875138	-0.725295
a1	pepa1b37	20210219_Jamet_2_1_NP_B4	3705	974.393	408.203	AKQDMACLIR	3	3Q:0.98 5M:15.99 7C:57.02	0.00077	27.4	0.00255124	2.08675
a1	pepa1b38	20210219_Jamet_2_1_NP_B4	4860	1154.33	540.768	AQYDDIVTR	2		0.0065	32.6	-0.00312695	-2.8939
a1	pepa1b38	20210219_Jamet_2_1_NP_B4	5588	1259.46	540.77	AQYDDIVTR	2		0.00088	28.7	0.00152805	1.41417
a1	pepa1b38	20210219_Jamet_2_1_NP_B4	5629	1265.28	360.848	AQYDDIVTR	3		0.0036	29	-0.00111695	-1.0337
a1	pepa1b39	20210219_Jamet_2_1_NP_B4	6027	1320.85	541.259	AQYDDIVTR	2	2Q:0.98	0.00037	32	-0.00622453	-5.75538
a1	pepa1b40	20210219_Jamet_1_1_NP_A1	3518	960.184	533.263	AQYEDIAQK	2		0.0026	29.6	-0.00160991	-1.51091
a1	pepa1b40	20210219_Jamet_1_2_NP_A6	3632	968.542	533.264	AQYEDIAQK	2		0.00054	29.6	0.000170089	0.159629
a1	pepa1b40	20210219_Jamet_2_1_NP_B4	3651	965.655	533.265	AQYEDIAQK	2		0.0012	29.6	0.00112209	1.05309
a1	pepa1b40	20210219_Jamet_2_2_NP_B9	3573	970.283	533.265	AQYEDIAQK	2		0.0013	29.6	0.000738089	0.692702
a1	pepa1b40	20210219_Jamet_2_3_NP_C2	3568	978.854	533.264	AQYEDIAQK	2		0.00083	29.6	4.20885e-05	0.0395004
a1	pepa1b40	20210219_Jamet_3_1_NP_C7	3585	963.468	533.264	AQYEDIAQK	2		0.002	33	-0.000401911	-0.377197
a1	pepa1b40	20210219_Jamet_3_2_NP_C12	3578	972.355	533.264	AQYEDIAQK	2		0.0011	29.6	-0.00118691	-1.11393
a1	pepa1b40	20210219_Jamet_3_3_NP_D5	3514	969.842	533.264	AQYEDIAQK	2		0.0048	29.5	-0.00110691	-1.03885
a1	pepa1b41	20210219_Jamet_2_1_NP_B4	4072	1030.61	533.756	AQYEDIAQK	2	8Q:0.98	0.0036	27.8	0.000276506	0.259264
a1	pepa1b42	20210219_Jamet_1_1_NP_A1	3744	993.738	576.779	AQYEDIAQKS	2		0.0022	30.5	-0.00330532	-2.86782
a1	pepa1b42	20210219_Jamet_1_3_NP_A11	3830	995.401	576.78	AQYEDIAQKS	2		0.00077	26.9	0.000234683	0.20362
a1	pepa1b42	20210219_Jamet_2_2_NP_B9	3790	1003.42	576.78	AQYEDIAQKS	2		0.00026	28.1	-0.000676317	-0.586799
a1	pepa1b43	20210219_Jamet_3_3_NP_D5	2799	846.076	427.554	AQYEDIAQKSK	3		0.0012	23.7	0.000758667	0.592409
a1	pepa1b44	20210219_Jamet_1_1_NP_A1	4004	1031.68	560.941	AQYEDIAQKSKAEAE	3		0.0039	28.7	0.00211092	1.2559
a1	pepa1b45	20210219_Jamet_3_2_NP_C12	4077	1047.92	547.268	AQYEDIAQR	2		0.0017	25.3	0.00174908	1.59948
a1	pepa1b46	20210219_Jamet_1_1_NP_A1	3771	997.853	547.266	AQYEEIANR	2		0.00017	30.4	-0.00175692	-1.60666
a1	pepa1b46	20210219_Jamet_1_2_NP_A6	3877	1003.72	547.267	AQYEEIANR	2		0.00062	28.5	-5.99211e-05	-0.0547961
a1	pepa1b46	20210219_Jamet_1_3_NP_A11	3867	1001.99	547.268	AQYEEIANR	2		0.0004	28.5	0.000950079	0.868821
a1	pepa1b46	20210219_Jamet_2_1_NP_B4	3944	1010.75	547.267	AQYEEIANR	2		0.00067	28.5	0.000180079	0.164677
a1	pepa1b46	20210219_Jamet_2_3_NP_C2	3803	1014.56	547.269	AQYEEIANR	2		0.00012	28.6	0.00362208	3.31229
a1	pepa1b46	20210219_Jamet_3_1_NP_C7	4040	1035.09	547.27	AQYEEIANR	2		0.0006	28.6	0.00549608	5.02601
a1	pepa1b46	20210219_Jamet_3_3_NP_D5	3779	1011.88	547.267	AQYEEIANR	2		0.00036	30.5	0.000302079	0.276243
a1	pepa1b47	20210219_Jamet_1_1_NP_A1	3958	1024.64	369.852	AQYEEIAQR	3		0.00025	28.6	-0.00196799	-1.77689
a1	pepa1b47	20210219_Jamet_1_2_NP_A6	4051	1026.79	369.852	AQYEEIAQR	3		0.00056	29.6	-0.00204799	-1.84913
a1	pepa1b47	20210219_Jamet_1_3_NP_A11	4043	1030.15	369.852	AQYEEIAQR	3		7.6e-05	31.1	-0.00260199	-2.34933
a1	pepa1b47	20210219_Jamet_2_1_NP_B4	4136	1039.56	554.275	AQYEEIAQR	2		0.00026	28.6	-0.000190986	-0.172441
a1	pepa1b47	20210219_Jamet_2_2_NP_B9	4002	1034.4	369.852	AQYEEIAQR	3		0.0075	23.9	-0.00285799	-2.58047
a1	pepa1b47	20210219_Jamet_2_2_NP_B9	4044	1040.19	554.274	AQYEEIAQR	2		0.00016	30.4	-0.00280199	-2.52991
a1	pepa1b47	20210219_Jamet_3_1_NP_C7	3970	1024.13	369.853	AQYEEIAQR	3		2.2e-05	28.6	0.000151014	0.136351
a1	pepa1b47	20210219_Jamet_3_3_NP_D5	4044	1052.44	554.275	AQYEEIAQR	2		0.0037	25.1	-8.59856e-05	-0.0776363
a1	pepa1b48	20210219_Jamet_2_1_NP_B4	4481	1091.4	554.765	AQYEEIAQR	2	8Q:0.98	0.009	25.1	-0.00498857	-4.50018
a1	pepa1b48	20210219_Jamet_2_2_NP_B9	4356	1090.61	554.766	AQYEEIAQR	2	8Q:0.98	0.0099	25.1	-0.00181657	-1.63872
a1	pepa1b48	20210219_Jamet_3_3_NP_D5	4353	1103.03	554.766	AQYEEIAQR	2	2Q:0.98	0.0071	24	-0.00129257	-1.16602
a1	pepa1b49	20210219_Jamet_1_3_NP_A11	3837	996.667	494.775	ASAITPSVSR	2		1.4e-05	50.7	0.000519791	0.525815
a1	pepa1b49	20210219_Jamet_3_1_NP_C7	3821	1001.75	494.774	ASAITPSVSR	2		8.3e-05	49.7	-0.00128221	-1.29707
a1	pepa1b49	20210219_Jamet_3_2_NP_C12	3793	1004.23	494.775	ASAITPSVSR	2		0.00023	33.5	-3.52094e-05	-0.0356175
a1	pepa1b50	20210219_Jamet_1_1_NP_A1	5205	1208.2	468.269	ASFIDKVR	2		2.1e-05	39.4	-0.000267249	-0.285666
a1	pepa1b50	20210219_Jamet_2_2_NP_B9	5232	1218.52	468.269	ASFIDKVR	2		5.5e-05	39.5	-5.92492e-05	-0.0633322
a1	pepa1b50	20210219_Jamet_2_3_NP_C2	5183	1218.13	468.269	ASFIDKVR	2		5.7e-05	39.5	0.000223751	0.23917
a1	pepa1b50	20210219_Jamet_3_1_NP_C7	5224	1217.45	468.268	ASFIDKVR	2		7.3e-05	39.5	-0.00304725	-3.25724
a1	pepa1b51	20210219_Jamet_2_1_NP_B4	5858	1295.84	440.91	ATAENEFVALKK	3		2e-05	40	-0.00109897	-0.832103
a1	pepa1b51	20210219_Jamet_2_1_NP_B4	5869	1297.25	660.862	ATAENEFVALKK	2		4.4e-07	48.3	0.00116803	0.884391
a1	pepa1b52	20210219_Jamet_2_1_NP_B4	8738	1728.89	610.827	ATAENEFVVLK	2		0.00084	36.1	-0.00569908	-4.66888
a1	pepa1b53	20210219_Jamet_2_1_NP_B4	6686	1418.61	450.254	ATAENEFVVLKK	3		0.00038	32.9	-4.09998e-06	-0.00303984
a1	pepa1b54	20210219_Jamet_2_1_NP_B4	4952	1167.89	718.373	ATGGGLSSVGGGSSTIK	2		2e-13	66.9	-0.000449244	-0.312901
a1	pepa1b54	20210219_Jamet_3_1_NP_C7	4969	1180.23	718.371	ATGGGLSSVGGGSSTIK	2		4.7e-09	51.2	-0.00335924	-2.33973
a1	pepa1b55	20210219_Jamet_1_1_NP_A1	7104	1479.31	799.902	ATGGGLSSVGGGSSTIKY	2		1e-09	55.1	-0.00546278	-3.41679
a1	pepa1b55	20210219_Jamet_1_3_NP_A11	7099	1480.65	799.904	ATGGGLSSVGGGSSTIKY	2		2.2e-09	62.7	-0.00130178	-0.814221
a1	pepa1b55	20210219_Jamet_2_2_NP_B9	7165	1481.72	799.903	ATGGGLSSVGGGSSTIKY	2		3.1e-09	56.8	-0.00413678	-2.58742
a1	pepa1b55	20210219_Jamet_3_1_NP_C7	7044	1480.35	799.902	ATGGGLSSVGGGSSTIKY	2		2.6e-09	59.6	-0.00530378	-3.31735
a1	pepa1b55	20210219_Jamet_3_2_NP_C12	7012	1480.37	799.904	ATGGGLSSVGGGSSTIKY	2		1.7e-09	58.2	-0.00136978	-0.856753
a1	pepa1b55	20210219_Jamet_3_3_NP_D5	6941	1497.93	799.905	ATGGGLSSVGGGSSTIKY	2		5.8e-11	62.7	0.000570221	0.356655
a1	pepa1b56	20210219_Jamet_1_3_NP_A11	6754	1427.64	850.428	ATGGGLSSVGGGSSTIKYT	2		1.1e-10	60.7	-0.00131825	-0.775509
a1	pepa1b57	20210219_Jamet_2_2_NP_B9	6892	1440.1	951.477	ATGGGLSSVGGGSSTIKYTTT	2		7.6e-08	53.7	0.00114481	0.601917
a1	pepa1b58	20210219_Jamet_1_1_NP_A1	5501	1248.58	802.728	ATGGGLSSVGGGSSTIKYTTTSSSSR	3		7.2e-14	74.4	-0.00415283	-1.72591
a1	pepa1b58	20210219_Jamet_1_3_NP_A11	5530	1250.97	802.729	ATGGGLSSVGGGSSTIKYTTTSSSSR	3		1e-15	95.2	-0.00188883	-0.784994
a1	pepa1b58	20210219_Jamet_2_2_NP_B9	5514	1256.31	802.73	ATGGGLSSVGGGSSTIKYTTTSSSSR	3		1e-15	90.6	0.00177417	0.737339
a1	pepa1b58	20210219_Jamet_3_1_NP_C7	5469	1251.44	802.729	ATGGGLSSVGGGSSTIKYTTTSSSSR	3		1e-15	86.3	-0.00135883	-0.564728
a1	pepa1b58	20210219_Jamet_3_2_NP_C12	5422	1249.35	802.729	ATGGGLSSVGGGSSTIKYTTTSSSSR	3		1e-15	90.4	-0.00310983	-1.29244
a1	pepa1b58	20210219_Jamet_3_3_NP_D5	5437	1271.14	802.729	ATGGGLSSVGGGSSTIKYTTTSSSSR	3		1e-15	94.9	-0.00196383	-0.816164
a1	pepa1b59	20210219_Jamet_2_1_NP_B4	13242	2565.85	1094.5	CCESNLEPLFSGYIETLR	2	1C:57.02 2C:57.02	1e-15	73.2	-0.004279	-1.95566
a1	pepa1b60	20210219_Jamet_2_1_NP_B4	12468	2403.24	782.038	CCESNLEPLFSGYIETLRR	3	1C:57.02 2C:57.02	4.5e-12	42.2	-0.00533802	-2.27721
a1	pepa1b61	20210219_Jamet_2_1_NP_B4	4684	1126.64	366.5	CCISAAPYR	3	1C:57.02 2C:57.02	0.0011	27	-0.000724411	-0.660063
a1	pepa1b62	20210219_Jamet_2_1_NP_B4	8354	1668.55	547.74	CCITAAPYR	2	1C:-17.03|57.02 2C:57.02	0.00025	30.2	-0.00228037	-2.08353
a1	pepa1b63	20210219_Jamet_2_1_NP_B4	5283	1215.85	556.255	CCITAAPYR	2	1C:57.02 2C:57.02	0.00041	27.8	-0.000339475	-0.30542
a1	pepa1b63	20210219_Jamet_2_1_NP_B4	8373	1671.47	556.256	CCITAAPYR	2	1C:57.02 2C:57.02	0.0021	27.8	0.00310052	2.78949
a1	pepa1b64	20210219_Jamet_2_1_NP_B4	5272	1214.2	615.796	CISACGPRPGR	2	1C:57.02 5C:57.02	1.3e-10	60.7	0.00197859	1.60785
a1	pepa1b65	20210219_Jamet_2_1_NP_B4	10457	2009.99	671.853	CKLAELEGALQK	2	1C:-17.03|57.02	5.8e-08	57	-0.00523821	-3.90124
a1	pepa1b65	20210219_Jamet_2_1_NP_B4	10471	2012.28	448.238	CKLAELEGALQK	3	1C:-17.03|57.02	0.00051	31.6	-0.00342221	-2.54875
a1	pepa1b66	20210219_Jamet_2_1_NP_B4	7791	1583.67	453.913	CKLAELEGALQK	3	1C:57.02	0.0042	31.7	-0.00653331	-4.80486
a1	pepa1b67	20210219_Jamet_2_1_NP_B4	10882	2087.94	882.078	CQNSKLEAAVAQSEQQGEAALSDAR	3	1C:-17.03|57.02	1e-15	79.8	-0.00719159	-2.71973
a1	pepa1b68	20210219_Jamet_1_2_NP_A6	13326	2255.42	551.803	DLDSIIAEVK	2		0.0038	32.4	-0.00117688	-1.06737
a1	pepa1b68	20210219_Jamet_2_3_NP_C2	12068	2267.9	551.801	DLDSIIAEVK	2		0.0034	29.9	-0.00477688	-4.33238
a1	pepa1b69	20210219_Jamet_2_1_NP_B4	11359	2175.84	717.849	DLNMDCIIAEIK	2	6C:57.02	0.00012	37	-0.00599075	-4.17562
a1	pepa1b69	20210219_Jamet_2_1_NP_B4	12982	2511.56	717.851	DLNMDCIIAEIK	2	6C:57.02	0.0001	33	-0.00289775	-2.01977
a1	pepa1b70	20210219_Jamet_2_1_NP_B4	10007	1933.3	725.849	DLNMDCIIAEIK	2	4M:15.99 6C:57.02	6.3e-07	43.9	-0.000605371	-0.417298
a1	pepa1b70	20210219_Jamet_2_1_NP_B4	10372	1997.03	725.847	DLNMDCIIAEIK	2	4M:15.99 6C:57.02	4.7e-08	54	-0.00491537	-3.3883
a1	pepa1b70	20210219_Jamet_2_1_NP_B4	10381	1998.38	484.233	DLNMDCIIAEIK	3	4M:15.99 6C:57.02	0.0003	31.9	-0.00588537	-4.05694
a1	pepa1b70	20210219_Jamet_2_1_NP_B4	10671	2047.74	725.847	DLNMDCIIAEIK	2	4M:15.99 6C:57.02	7.9e-06	43.8	-0.00520937	-3.59096
a1	pepa1b70	20210219_Jamet_2_1_NP_B4	10951	2099.86	725.847	DLNMDCIIAEIK	2	4M:15.99 6C:57.02	2.2e-05	35.7	-0.00568037	-3.91563
a1	pepa1b70	20210219_Jamet_2_1_NP_B4	12437	2396.92	725.847	DLNMDCIIAEIK	2	4M:15.99 6C:57.02	0.00025	27.7	-0.00469337	-3.23526
a1	pepa1b71	20210219_Jamet_1_2_NP_A6	8681	1609.31	848.422	DVDAAYMNKVELEAK	2		2.5e-11	76.4	0.0117238	6.91334
a1	pepa1b71	20210219_Jamet_1_3_NP_A11	8033	1616.91	565.946	DVDAAYMNKVELEAK	3		3.9e-07	43.8	-0.00271817	-1.60286
a1	pepa1b71	20210219_Jamet_1_3_NP_A11	8043	1618.18	848.414	DVDAAYMNKVELEAK	2		5.2e-13	85	-0.00517817	-3.05348
a1	pepa1b71	20210219_Jamet_2_1_NP_B4	8010	1617.04	848.416	DVDAAYMNKVELEAK	2		1e-15	74.2	-0.00172417	-1.01672
a1	pepa1b71	20210219_Jamet_2_2_NP_B9	8156	1616.75	848.417	DVDAAYMNKVELEAK	2		2.6e-13	70.4	0.000961827	0.567173
a1	pepa1b71	20210219_Jamet_3_1_NP_C7	7951	1612.46	848.415	DVDAAYMNKVELEAK	2		6.8e-15	80.2	-0.00254817	-1.50262
a1	pepa1b71	20210219_Jamet_3_2_NP_C12	7914	1611	848.416	DVDAAYMNKVELEAK	2		1e-15	83.9	-0.00156817	-0.924726
a1	pepa1b71	20210219_Jamet_3_3_NP_D5	7830	1633.87	848.411	DVDAAYMNKVELEAK	2		3.5e-14	81.2	-0.0106582	-6.28495
a1	pepa1b72	20210219_Jamet_1_1_NP_A1	6106	1333.75	571.278	DVDAAYMNKVELEAK	3	7M:15.99	4.6e-07	38.3	-0.000370793	-0.216607
a1	pepa1b72	20210219_Jamet_1_2_NP_A6	6555	1346.64	571.279	DVDAAYMNKVELEAK	3	7M:15.99	5.4e-08	38.2	0.00192321	1.12349
a1	pepa1b72	20210219_Jamet_1_3_NP_A11	6196	1345.21	856.412	DVDAAYMNKVELEAK	2	7M:15.99	6.6e-05	32.5	-0.00348379	-2.03514
a1	pepa1b72	20210219_Jamet_1_3_NP_A11	6202	1346.01	571.279	DVDAAYMNKVELEAK	3	7M:15.99	1.2e-07	40.2	0.000223207	0.130392
a1	pepa1b72	20210219_Jamet_2_1_NP_B4	6203	1347.09	571.277	DVDAAYMNKVELEAK	3	7M:15.99	2e-06	37.4	-0.00375879	-2.19579
a1	pepa1b72	20210219_Jamet_2_3_NP_C2	6085	1342.7	571.279	DVDAAYMNKVELEAK	3	7M:15.99	6.7e-07	40.2	0.00191021	1.11589
a1	pepa1b72	20210219_Jamet_3_1_NP_C7	6108	1341.15	571.277	DVDAAYMNKVELEAK	3	7M:15.99	1.1e-07	38.3	-0.00349479	-2.04156
a1	pepa1b72	20210219_Jamet_3_2_NP_C12	6078	1341.59	571.277	DVDAAYMNKVELEAK	3	7M:15.99	6.2e-06	38.2	-0.00464079	-2.71103
a1	pepa1b72	20210219_Jamet_3_3_NP_D5	6022	1357.16	856.413	DVDAAYMNKVELEAK	2	7M:15.99	3.7e-13	71.9	-0.00277779	-1.62271
a1	pepa1b73	20210219_Jamet_1_1_NP_A1	7646	1557.89	847.926	DVDAAYMNKVELQAK	2		2.3e-14	80	0.00385341	2.27361
a1	pepa1b73	20210219_Jamet_1_2_NP_A6	8268	1557.38	565.62	DVDAAYMNKVELQAK	3		4.3e-09	47.1	0.00331241	1.95441
a1	pepa1b73	20210219_Jamet_1_2_NP_A6	8274	1558.09	847.928	DVDAAYMNKVELQAK	2		1e-15	84.9	0.00616541	3.63775
a1	pepa1b73	20210219_Jamet_1_3_NP_A11	7663	1563.39	565.62	DVDAAYMNKVELQAK	3		4.9e-07	47.1	0.00461941	2.72557
a1	pepa1b73	20210219_Jamet_1_3_NP_A11	7673	1564.94	847.927	DVDAAYMNKVELQAK	2		4.5e-12	67.1	0.00500941	2.95568
a1	pepa1b73	20210219_Jamet_2_1_NP_B4	7639	1562.3	565.618	DVDAAYMNKVELQAK	3		1.6e-06	45.2	-0.00254159	-1.4996
a1	pepa1b73	20210219_Jamet_2_2_NP_B9	7763	1563.52	565.62	DVDAAYMNKVELQAK	3		3.2e-08	47.1	0.00298441	1.76088
a1	pepa1b73	20210219_Jamet_2_2_NP_B9	7776	1565.08	847.926	DVDAAYMNKVELQAK	2		2.3e-09	62.5	0.00319041	1.88242
a1	pepa1b73	20210219_Jamet_2_3_NP_C2	7635	1563.5	565.619	DVDAAYMNKVELQAK	3		2.9e-07	45.2	-0.000328591	-0.193877
a1	pepa1b73	20210219_Jamet_2_3_NP_C2	7642	1564.59	847.923	DVDAAYMNKVELQAK	2		1.4e-15	84.9	-0.00339659	-2.00408
a1	pepa1b73	20210219_Jamet_3_1_NP_C7	7572	1557.59	565.618	DVDAAYMNKVELQAK	3		1.6e-08	47.2	-0.00269759	-1.59165
a1	pepa1b73	20210219_Jamet_3_1_NP_C7	7586	1559.52	847.922	DVDAAYMNKVELQAK	2		6.1e-15	84.9	-0.00431159	-2.54395
a1	pepa1b73	20210219_Jamet_3_2_NP_C12	7541	1557.31	565.62	DVDAAYMNKVELQAK	3		5.5e-08	45.2	0.00403641	2.38158
a1	pepa1b73	20210219_Jamet_3_2_NP_C12	7565	1560.44	847.926	DVDAAYMNKVELQAK	2		1e-15	85	0.00224841	1.32662
a1	pepa1b73	20210219_Jamet_3_3_NP_D5	7459	1576.81	565.621	DVDAAYMNKVELQAK	3		1e-06	45.2	0.00560141	3.30497
a1	pepa1b73	20210219_Jamet_3_3_NP_D5	7487	1581	847.925	DVDAAYMNKVELQAK	2		1e-15	88	0.00182741	1.07822
a1	pepa1b74	20210219_Jamet_3_1_NP_C7	7264	1512.83	565.948	DVDAAYMNKVELQAK	3	8N:0.98	1.4e-09	50.3	0.00393583	2.32089
a1	pepa1b74	20210219_Jamet_3_1_NP_C7	7270	1513.8	848.422	DVDAAYMNKVELQAK	2	8N:0.98	7.4e-12	65.4	0.0101568	5.98931
a1	pepa1b75	20210219_Jamet_1_1_NP_A1	5752	1283.1	570.95	DVDAAYMNKVELQAK	3	7M:15.99	1.7e-05	34.7	-0.00218721	-1.27844
a1	pepa1b75	20210219_Jamet_1_1_NP_A1	5775	1286.29	855.922	DVDAAYMNKVELQAK	2	7M:15.99	9.3e-14	62.6	-0.000881211	-0.515076
a1	pepa1b75	20210219_Jamet_1_2_NP_A6	6094	1289.8	570.949	DVDAAYMNKVELQAK	3	7M:15.99	3.8e-07	40.2	-0.00280421	-1.63909
a1	pepa1b75	20210219_Jamet_1_2_NP_A6	6108	1291.6	855.922	DVDAAYMNKVELQAK	2	7M:15.99	3.9e-13	70.8	-0.000914211	-0.534365
a1	pepa1b75	20210219_Jamet_1_3_NP_A11	5853	1295.3	570.95	DVDAAYMNKVELQAK	3	7M:15.99	3.7e-07	40.1	-0.00126521	-0.739527
a1	pepa1b75	20210219_Jamet_2_1_NP_B4	5847	1294.56	570.949	DVDAAYMNKVELQAK	3	7M:15.99	1.1e-06	40.2	-0.00458221	-2.67834
a1	pepa1b75	20210219_Jamet_2_2_NP_B9	5876	1303.64	570.951	DVDAAYMNKVELQAK	3	7M:15.99	1e-06	38.2	0.00122379	0.715316
a1	pepa1b75	20210219_Jamet_3_1_NP_C7	5755	1290.58	570.949	DVDAAYMNKVELQAK	3	7M:15.99	2.6e-06	40.1	-0.00311221	-1.81912
a1	pepa1b75	20210219_Jamet_3_1_NP_C7	5767	1292.34	855.919	DVDAAYMNKVELQAK	2	7M:15.99	8.6e-14	75.4	-0.00526921	-3.0799
a1	pepa1b75	20210219_Jamet_3_2_NP_C12	5727	1291.35	570.95	DVDAAYMNKVELQAK	3	7M:15.99	3.7e-07	40.2	-0.00173421	-1.01366
a1	pepa1b75	20210219_Jamet_3_2_NP_C12	5814	1302.87	855.922	DVDAAYMNKVELQAK	2	7M:15.99	3.1e-14	54.7	0.000947789	0.553992
a1	pepa1b75	20210219_Jamet_3_3_NP_D5	5694	1307.84	570.95	DVDAAYMNKVELQAK	3	7M:15.99	1.4e-07	40.2	0.000140789	0.0822928
a1	pepa1b76	20210219_Jamet_2_1_NP_B4	4456	1086.84	380.521	DVDCAYLRK	3	4C:57.02	0.007	24.1	-0.00285467	-2.50508
a1	pepa1b76	20210219_Jamet_2_1_NP_B4	4462	1087.81	570.278	DVDCAYLRK	2	4C:57.02	0.00053	35.4	-0.00292467	-2.56651
a1	pepa1b77	20210219_Jamet_1_1_NP_A1	7670	1561.42	551.945	DVDGAYMTKVDLQAK	3		2.3e-10	48.6	0.00436751	2.64087
a1	pepa1b77	20210219_Jamet_1_3_NP_A11	7702	1569.04	551.944	DVDGAYMTKVDLQAK	3		2e-08	48.5	0.00246451	1.4902
a1	pepa1b77	20210219_Jamet_2_1_NP_B4	7700	1571.15	551.944	DVDGAYMTKVDLQAK	3		9.5e-10	45.2	0.00233251	1.41038
a1	pepa1b77	20210219_Jamet_2_2_NP_B9	7808	1569.71	551.944	DVDGAYMTKVDLQAK	3		9.6e-09	48.5	0.00317151	1.91769
a1	pepa1b77	20210219_Jamet_3_2_NP_C12	7604	1565.74	551.945	DVDGAYMTKVDLQAK	3		8.5e-09	50.2	0.00589651	3.5654
a1	pepa1b77	20210219_Jamet_3_3_NP_D5	7529	1586.82	551.943	DVDGAYMTKVDLQAK	3		9.8e-09	48.3	0.000656511	0.396967
a1	pepa1b78	20210219_Jamet_1_1_NP_A1	5936	1307.8	557.273	DVDGAYMTKVDLQAK	3	7M:15.99	1.4e-05	34.3	-0.00600911	-3.59868
a1	pepa1b78	20210219_Jamet_1_1_NP_A1	5951	1309.98	835.408	DVDGAYMTKVDLQAK	2	7M:15.99	1.1e-10	71.1	-0.00142211	-0.851659
a1	pepa1b78	20210219_Jamet_1_2_NP_A6	6291	1313.53	557.274	DVDGAYMTKVDLQAK	3	7M:15.99	0.00015	31.5	-0.00344411	-2.06258
a1	pepa1b78	20210219_Jamet_1_3_NP_A11	6035	1320.33	557.274	DVDGAYMTKVDLQAK	3	7M:15.99	0.00051	31.5	-0.00309411	-1.85297
a1	pepa1b78	20210219_Jamet_1_3_NP_A11	6053	1323.06	835.407	DVDGAYMTKVDLQAK	2	7M:15.99	4.9e-10	60.1	-0.00262711	-1.5733
a1	pepa1b78	20210219_Jamet_2_2_NP_B9	6032	1323.13	557.271	DVDGAYMTKVDLQAK	3	7M:15.99	8.4e-05	34.3	-0.0112671	-6.74754
a1	pepa1b78	20210219_Jamet_2_3_NP_C2	5945	1322.9	557.276	DVDGAYMTKVDLQAK	3	7M:15.99	0.0022	28.6	0.00187689	1.12401
a1	pepa1b78	20210219_Jamet_3_1_NP_C7	5954	1318.36	557.273	DVDGAYMTKVDLQAK	3	7M:15.99	5.2e-05	35.1	-0.00511911	-3.06568
a1	pepa1b78	20210219_Jamet_3_2_NP_C12	5926	1318.63	557.273	DVDGAYMTKVDLQAK	3	7M:15.99	1.6e-05	35	-0.00528411	-3.1645
a1	pepa1b78	20210219_Jamet_3_3_NP_D5	5902	1338.15	557.274	DVDGAYMTKVDLQAK	3	7M:15.99	3.5e-05	33.3	-0.00278511	-1.66792
a1	pepa1b79	20210219_Jamet_1_1_NP_A1	9346	1816.55	584.964	DVDNAYMIKVELQSK	3		4.8e-08	50.3	-0.0051864	-2.95878
a1	pepa1b79	20210219_Jamet_1_1_NP_A1	9365	1819.25	876.945	DVDNAYMIKVELQSK	2		8.3e-13	61.6	-0.0019194	-1.095
a1	pepa1b80	20210219_Jamet_1_1_NP_A1	8238	1645.13	590.297	DVDNAYMIKVELQSK	3	7M:15.99	2.2e-07	43.2	-0.00102002	-0.57665
a1	pepa1b81	20210219_Jamet_1_1_NP_A1	6756	1427.86	571.263	DYQELMNTK	2		0.00092	27.8	-0.000299834	-0.262662
a1	pepa1b81	20210219_Jamet_1_2_NP_A6	7249	1430.52	571.263	DYQELMNTK	2		0.00083	27.8	0.000204166	0.178855
a1	pepa1b81	20210219_Jamet_1_3_NP_A11	6812	1436.08	571.261	DYQELMNTK	2		0.0013	27.8	-0.00407283	-3.56791
a1	pepa1b81	20210219_Jamet_2_1_NP_B4	6815	1436.47	571.26	DYQELMNTK	2		0.0005	27.8	-0.00598983	-5.24725
a1	pepa1b81	20210219_Jamet_2_2_NP_B9	6871	1437.24	571.262	DYQELMNTK	2		0.0015	27.8	-0.00236883	-2.07516
a1	pepa1b81	20210219_Jamet_2_3_NP_C2	6763	1436.46	571.264	DYQELMNTK	2		0.0015	27.8	0.000865166	0.757907
a1	pepa1b81	20210219_Jamet_3_1_NP_C7	6773	1437.36	571.262	DYQELMNTK	2		0.0015	27.8	-0.00200883	-1.75979
a1	pepa1b81	20210219_Jamet_3_2_NP_C12	6731	1435.99	571.262	DYQELMNTK	2		0.0003	27.8	-0.00284783	-2.49478
a1	pepa1b81	20210219_Jamet_3_3_NP_D5	6645	1448.8	571.264	DYQELMNTK	2		0.0012	27.8	0.000687166	0.601975
a1	pepa1b82	20210219_Jamet_1_1_NP_A1	7322	1510.85	571.754	DYQELMNTK	2	3Q:0.98	0.0017	23.9	-0.00257242	-2.25156
a1	pepa1b82	20210219_Jamet_2_2_NP_B9	7303	1500.92	571.755	DYQELMNTK	2	7N:0.98	0.0035	22	-0.00163442	-1.43056
a1	pepa1b82	20210219_Jamet_2_3_NP_C2	7186	1499.18	571.754	DYQELMNTK	2	7N:0.98	0.0024	24	-0.00184242	-1.61261
a1	pepa1b82	20210219_Jamet_3_2_NP_C12	7259	1515.8	571.754	DYQELMNTK	2	3Q:0.98	0.00023	24	-0.00260742	-2.2822
a1	pepa1b82	20210219_Jamet_3_3_NP_D5	7037	1512.3	571.755	DYQELMNTK	2	7N:0.98	0.0038	23.9	0.000134583	0.117797
a1	pepa1b83	20210219_Jamet_1_1_NP_A1	3791	1000.96	579.26	DYQELMNTK	2	6M:15.99	0.0013	27.4	-0.00120345	-1.03969
a1	pepa1b83	20210219_Jamet_1_2_NP_A6	3964	1015.15	579.257	DYQELMNTK	2	6M:15.99	0.0083	27.3	-0.00672045	-5.80594
a1	pepa1b83	20210219_Jamet_1_3_NP_A11	3884	1004.91	579.26	DYQELMNTK	2	6M:15.99	0.008	27.4	-0.00104045	-0.898869
a1	pepa1b83	20210219_Jamet_1_3_NP_A11	4934	1166.97	579.262	DYQELMNTK	2	6M:15.99	0.0012	25.4	0.00272555	2.35465
a1	pepa1b83	20210219_Jamet_2_1_NP_B4	3934	1009.19	579.261	DYQELMNTK	2	6M:15.99	0.0059	27.4	-0.000340454	-0.294125
a1	pepa1b83	20210219_Jamet_2_2_NP_B9	3847	1013.66	579.26	DYQELMNTK	2	6M:15.99	0.0016	27.3	-0.00146845	-1.26863
a1	pepa1b83	20210219_Jamet_2_3_NP_C2	3818	1016.72	579.262	DYQELMNTK	2	6M:15.99	0.0012	27.5	0.00223955	1.93479
a1	pepa1b83	20210219_Jamet_3_1_NP_C7	3849	1006.24	579.261	DYQELMNTK	2	6M:15.99	0.0084	25.4	-3.64537e-05	-0.031493
a1	pepa1b83	20210219_Jamet_3_1_NP_C7	6043	1331.65	579.259	DYQELMNTK	2	6M:15.99	0.0017	25.3	-0.00263245	-2.27423
a1	pepa1b83	20210219_Jamet_3_2_NP_C12	3830	1011.49	579.261	DYQELMNTK	2	6M:15.99	0.0024	27.4	-0.000171454	-0.148122
a1	pepa1b83	20210219_Jamet_3_3_NP_D5	3787	1013.02	579.26	DYQELMNTK	2	6M:15.99	0.0029	27.4	-0.00117245	-1.01291
a1	pepa1b84	20210219_Jamet_1_1_NP_A1	4235	1066.27	579.751	DYQELMNTK	2	6M:15.99 7N:0.98	0.00073	27.1	-0.00315904	-2.72684
a1	pepa1b84	20210219_Jamet_1_3_NP_A11	4311	1070.83	579.753	DYQELMNTK	2	6M:15.99 7N:0.98	0.00019	27.1	0.000615964	0.531692
a1	pepa1b84	20210219_Jamet_2_1_NP_B4	4377	1075.93	579.751	DYQELMNTK	2	6M:15.99 7N:0.98	0.0055	21.6	-0.00395204	-3.41134
a1	pepa1b85	20210219_Jamet_3_3_NP_D5	8078	1672.11	570.275	DYQELMNVK	2		0.0064	24.2	0.00222672	1.95405
a1	pepa1b86	20210219_Jamet_2_1_NP_B4	12877	2488.77	838.731	ECCQSNLEPLFEGYIETLRR	3	2C:57.02 3C:57.02	3e-11	49.1	0.00371579	1.47793
a1	pepa1b87	20210219_Jamet_1_2_NP_A6	13478	2280.15	744.396	EDALQKAKQDLAR	2	5Q:0.98 9Q:0.98	0.007	29.4	0.0139196	9.35603
a1	pepa1b88	20210219_Jamet_1_1_NP_A1	5480	1245.57	508.772	EELQITAGR	2		0.0014	34.8	-0.000969329	-0.95356
a1	pepa1b88	20210219_Jamet_1_3_NP_A11	5540	1252.39	508.772	EELQITAGR	2		0.0022	31	-0.000746329	-0.734188
a1	pepa1b88	20210219_Jamet_2_2_NP_B9	5548	1261.31	508.772	EELQITAGR	2		0.00092	32.2	-0.00107333	-1.05587
a1	pepa1b89	20210219_Jamet_1_3_NP_A11	4427	1087.69	486.255	ELDPEIQK	2		0.0071	29.1	-0.00249672	-2.56995
a1	pepa1b89	20210219_Jamet_3_1_NP_C7	4369	1086.37	486.255	EIDPEIQK	2		0.0028	32.7	-0.00202972	-2.08925
a1	pepa1b89	20210219_Jamet_3_2_NP_C12	4335	1086.6	486.256	ELDPEIQK	2		0.0063	32.6	0.000204282	0.210274
a1	pepa1b90	20210219_Jamet_1_1_NP_A1	4490	1105.27	599.835	EIDPEIQKVK	2		0.00059	38.2	-0.00420615	-3.50902
a1	pepa1b90	20210219_Jamet_1_3_NP_A11	4531	1104.51	400.226	EIDPEIQKVK	3		0.007	25.5	-0.00515815	-4.30323
a1	pepa1b90	20210219_Jamet_1_3_NP_A11	4540	1106.08	599.836	EIDPEIQKVK	2		0.00023	40.1	-0.00205915	-1.71786
a1	pepa1b90	20210219_Jamet_2_1_NP_B4	4603	1113.38	400.225	EIDPEIQKVK	3		0.0018	27.3	-0.00737715	-6.15446
a1	pepa1b90	20210219_Jamet_2_2_NP_B9	4462	1111.36	400.226	EIDPEIQKVK	3		0.0047	27.3	-0.00530615	-4.4267
a1	pepa1b90	20210219_Jamet_2_2_NP_B9	4498	1116.96	599.836	EIDPEIQKVK	2		7.5e-05	40.1	-0.00343915	-2.86914
a1	pepa1b90	20210219_Jamet_2_3_NP_C2	4434	1112.3	400.226	EIDPEIQKVK	3		0.0021	27.3	-0.00421415	-3.51569
a1	pepa1b90	20210219_Jamet_3_1_NP_C7	4493	1107.42	400.226	EIDPEIQKVK	3		0.0082	27.3	-0.00506215	-4.22315
a1	pepa1b90	20210219_Jamet_3_2_NP_C12	4448	1106.21	400.226	EIDPEIQKVK	3		0.0032	27.3	-0.00336815	-2.80991
a1	pepa1b90	20210219_Jamet_3_2_NP_C12	4452	1107.05	599.838	EIDPEIQKVK	2		0.00011	38.2	8.38516e-05	0.069954
a1	pepa1b90	20210219_Jamet_3_3_NP_D5	4448	1121.99	400.226	EIDPEIQKVK	3		0.0019	27.2	-0.00416315	-3.47315
a1	pepa1b90	20210219_Jamet_3_3_NP_D5	4460	1124.1	599.839	EIDPEIQKVK	2		5.1e-05	40.2	0.00324185	2.70455
a1	pepa1b91	20210219_Jamet_1_1_NP_A1	6331	1366.56	645.341	ELLQQVDTSTR	2		5.6e-06	38.6	0.00445095	3.45123
a1	pepa1b91	20210219_Jamet_1_2_NP_A6	6756	1370.48	645.339	ELLQQVDTSTR	2		0.00012	36.7	0.000971946	0.75364
a1	pepa1b91	20210219_Jamet_1_3_NP_A11	6396	1373.57	645.339	ELLQQVDTSTR	2		0.00057	40.7	0.00113495	0.880029
a1	pepa1b91	20210219_Jamet_2_1_NP_B4	6405	1377.16	645.339	ELLQQVDTSTR	2		1.9e-05	36.7	0.000182946	0.141855
a1	pepa1b91	20210219_Jamet_2_2_NP_B9	6444	1378.87	645.339	ELLQQVDTSTR	2		0.00037	36.7	0.000492946	0.382227
a1	pepa1b91	20210219_Jamet_2_3_NP_C2	6351	1379.01	645.339	ELLQQVDTSTR	2		7.9e-05	36.6	0.00200695	1.55617
a1	pepa1b91	20210219_Jamet_3_1_NP_C7	6341	1374.6	645.337	ELLQQVDTSTR	2		9.8e-05	40.6	-0.00211105	-1.6369
a1	pepa1b91	20210219_Jamet_3_2_NP_C12	6305	1373.71	645.338	ELLQQVDTSTR	2		0.00058	36.7	-0.000584054	-0.452871
a1	pepa1b91	20210219_Jamet_3_3_NP_D5	6240	1388.66	645.339	ELLQQVDTSTR	2		1.6e-05	38.6	0.00182895	1.41815
a1	pepa1b92	20210219_Jamet_1_1_NP_A1	8737	1721.66	672.377	EIKIEISELNR	2		1.9e-05	48.1	-0.00641376	-4.77302
a1	pepa1b92	20210219_Jamet_1_1_NP_A1	8741	1722.25	448.587	EIKIEISELNR	3		0.00028	32.3	-0.00632776	-4.70902
a1	pepa1b92	20210219_Jamet_1_2_NP_A6	9504	1711.13	448.589	EIKIEISELNR	3		7.4e-05	36	0.000877243	0.652831
a1	pepa1b92	20210219_Jamet_1_3_NP_A11	8767	1729.3	448.587	EIKIEISELNR	3		2.6e-05	37.2	-0.00505076	-3.75869
a1	pepa1b92	20210219_Jamet_1_3_NP_A11	8775	1730.57	672.377	EIKIEISELNR	2		1.2e-06	48.1	-0.00661176	-4.92037
a1	pepa1b92	20210219_Jamet_2_1_NP_B4	8676	1717.79	448.587	EIKIEISELNR	3		0.00018	36	-0.00569276	-4.23646
a1	pepa1b92	20210219_Jamet_2_1_NP_B4	8696	1721.43	672.378	EIKIEISELNR	2		4.6e-06	48.1	-0.00516276	-3.84204
a1	pepa1b92	20210219_Jamet_2_2_NP_B9	8853	1715.39	448.589	EIKIEISELNR	3		2e-05	35.9	-0.00171076	-1.27312
a1	pepa1b92	20210219_Jamet_2_2_NP_B9	8864	1716.97	672.379	EIKIEISELNR	2		1.6e-05	48.1	-0.00135176	-1.00596
a1	pepa1b92	20210219_Jamet_2_3_NP_C2	8730	1719.84	448.589	EIKIEISELNR	3		4.5e-05	35.9	-0.000497757	-0.370423
a1	pepa1b92	20210219_Jamet_2_3_NP_C2	8740	1721.21	672.38	EIKIEISELNR	2		2.5e-06	48.1	0.000241243	0.17953
a1	pepa1b92	20210219_Jamet_3_1_NP_C7	8652	1717.87	448.588	EIKIEISELNR	3		0.00059	32.4	-0.00401776	-2.98995
a1	pepa1b92	20210219_Jamet_3_1_NP_C7	8671	1720.79	672.38	EIKIEISELNR	2		1.4e-05	48.1	-0.00111876	-0.832561
a1	pepa1b92	20210219_Jamet_3_2_NP_C12	8601	1712.16	448.588	EIKIEISELNR	3		0.00032	32.2	-0.00316776	-2.3574
a1	pepa1b92	20210219_Jamet_3_2_NP_C12	8607	1713.15	672.379	EIKIEISELNR	2		1.2e-05	48.1	-0.00310176	-2.30828
a1	pepa1b92	20210219_Jamet_3_3_NP_D5	8490	1736.43	448.588	EIKIEISELNR	3		7.9e-05	36	-0.00480776	-3.57786
a1	pepa1b92	20210219_Jamet_3_3_NP_D5	8500	1738.04	672.377	EIKIEISELNR	2		2.1e-06	50.9	-0.00540676	-4.02362
a1	pepa1b93	20210219_Jamet_1_1_NP_A1	5111	1195.44	552.79	EQIMVLNNK	2	4M:15.99	0.00051	30.7	8.8239e-05	0.0798853
a1	pepa1b93	20210219_Jamet_3_1_NP_C7	5121	1201.54	552.79	EQIMVLNNK	2	4M:15.99	0.0029	28.7	0.000511239	0.462839
a1	pepa1b93	20210219_Jamet_3_3_NP_D5	5057	1215.59	552.789	EQIMVLNNK	2	4M:15.99	0.00042	32.4	-5.8761e-05	-0.053198
a1	pepa1b94	20210219_Jamet_1_3_NP_A11	5413	1234.49	555.285	EREQIKSLNNQFAS	3		0.00015	34.5	-0.00043627	-0.262207
a1	pepa1b95	20210219_Jamet_1_3_NP_A11	8117	1629.33	703.339	ETNVILSMDNNR	2		1.6e-06	44.1	-0.00315299	-2.24304
a1	pepa1b96	20210219_Jamet_2_1_NP_B4	7723	1574.49	356.545	FAAFIDKVR	3		0.0009	32.1	1.01525	11.1551
a1	pepa1b97	20210219_Jamet_1_1_NP_A1	9899	1904.92	463.751	FASFIDKV	2		0.0093	26.7	-0.00386714	-4.17393
a1	pepa1b98	20210219_Jamet_1_2_NP_A6	12446	2118.7	648.008	FASFIDKVQFLEQQNK	3		1.6e-06	40	0.0030234	1.55684
a1	pepa1b98	20210219_Jamet_2_1_NP_B4	11309	2165.86	648.005	FASFIDKVQFLEQQNK	3		0.00031	33.7	-0.0065186	-3.35663
a1	pepa1b99	20210219_Jamet_1_1_NP_A1	7804	1580.24	361.538	FASFIDKVR	3		3.7e-06	38.3	-0.00119866	-1.10721
a1	pepa1b99	20210219_Jamet_1_1_NP_A1	7813	1581.53	541.803	FASFIDKVR	2		2.9e-09	50.2	-0.000275664	-0.254631
a1	pepa1b99	20210219_Jamet_1_2_NP_A6	8339	1566.42	361.538	FASFIDKVR	3		2.8e-06	33.5	0.00130734	1.20759
a1	pepa1b99	20210219_Jamet_1_2_NP_A6	8358	1568.59	541.804	FASFIDKVR	2		3.7e-10	50.2	0.00121034	1.11799
a1	pepa1b99	20210219_Jamet_1_3_NP_A11	7871	1593.8	361.537	FASFIDKVR	3		4.5e-09	39.4	-0.00194166	-1.79352
a1	pepa1b99	20210219_Jamet_1_3_NP_A11	7874	1594.14	541.803	FASFIDKVR	2		2.6e-07	49.9	-0.00102566	-0.947408
a1	pepa1b99	20210219_Jamet_2_1_NP_B4	7814	1587.2	361.536	FASFIDKVR	3		1.3e-07	38.2	-0.00638566	-5.89846
a1	pepa1b99	20210219_Jamet_2_1_NP_B4	7826	1589	541.8	FASFIDKVR	2		3.5e-07	50.2	-0.00671866	-6.20605
a1	pepa1b99	20210219_Jamet_2_2_NP_B9	7873	1577.81	361.538	FASFIDKVR	3		1.7e-06	38.3	-0.00129966	-1.2005
a1	pepa1b99	20210219_Jamet_2_2_NP_B9	7910	1583.06	541.803	FASFIDKVR	2		8e-08	50.2	0.000130336	0.120392
a1	pepa1b99	20210219_Jamet_2_3_NP_C2	7775	1582.38	361.536	FASFIDKVR	3		3e-06	38.2	-0.00448566	-4.14342
a1	pepa1b99	20210219_Jamet_2_3_NP_C2	7783	1583.54	541.802	FASFIDKVR	2		3.1e-08	50.2	-0.00302766	-2.79666
a1	pepa1b99	20210219_Jamet_3_1_NP_C7	7749	1582.85	361.537	FASFIDKVR	3		0.00012	33.5	-0.00299666	-2.76803
a1	pepa1b99	20210219_Jamet_3_1_NP_C7	7755	1583.82	541.802	FASFIDKVR	2		1.1e-08	50.2	-0.00286566	-2.64702
a1	pepa1b99	20210219_Jamet_3_2_NP_C12	7729	1583.92	361.537	FASFIDKVR	3		1.6e-08	38.3	-0.00352866	-3.25944
a1	pepa1b99	20210219_Jamet_3_2_NP_C12	7735	1584.89	541.801	FASFIDKVR	2		7.5e-08	48.4	-0.00550466	-5.08467
a1	pepa1b99	20210219_Jamet_3_3_NP_D5	7693	1610.47	361.538	FASFIDKVR	3		1.2e-07	38.2	-0.000848664	-0.783913
a1	pepa1b99	20210219_Jamet_3_3_NP_D5	7709	1612.87	541.803	FASFIDKVR	2		1.9e-07	48.2	-0.000534664	-0.49387
a1	pepa1c100	20210219_Jamet_1_1_NP_A1	10113	1943.29	570.294	FESFINNLR	2		1.6e-05	32.3	-0.00393688	-3.45466
a1	pepa1c100	20210219_Jamet_1_3_NP_A11	10101	1950.88	570.295	FESFINNLR	2		0.00072	32.3	-0.00194288	-1.7049
a1	pepa1c101	20210219_Jamet_1_1_NP_A1	12494	2398.73	891.09	FGGFGGPGGVGGLGGPGGFGPGGYPGGIHEV	3		2.3e-10	51.3	-0.0131144	-4.90941
a1	pepa1c101	20210219_Jamet_1_2_NP_A6	14112	2384.37	891.094	FGGFGGPGGVGGLGGPGGFGPGGYPGGIHEV	3		4.2e-09	50.7	-0.00180036	-0.67397
a1	pepa1c101	20210219_Jamet_1_3_NP_A11	12368	2399.7	891.094	FGGFGGPGGVGGLGGPGGFGPGGYPGGIHEV	3		2.6e-09	53.6	0.000129644	0.0485327
a1	pepa1c101	20210219_Jamet_2_2_NP_B9	13034	2385.79	891.094	FGGFGGPGGVGGLGGPGGFGPGGYPGGIHEV	3		6e-09	48.9	-0.00263836	-0.987679
a1	pepa1c101	20210219_Jamet_3_1_NP_C7	12381	2398.1	891.093	FGGFGGPGGVGGLGGPGGFGPGGYPGGIHEV	3		4.2e-10	52.9	-0.00495136	-1.85356
a1	pepa1c101	20210219_Jamet_3_2_NP_C12	12517	2404.83	891.092	FGGFGGPGGVGGLGGPGGFGPGGYPGGIHEV	3		8.2e-12	60.1	-0.00642036	-2.40349
a1	pepa1c101	20210219_Jamet_3_3_NP_D5	12057	2405.16	891.09	FGGFGGPGGVGGLGGPGGFGPGGYPGGIHEV	3		4.8e-07	44.1	-0.0126124	-4.72149
a1	pepa1c102	20210219_Jamet_1_3_NP_A11	12400	2406.11	896.768	FGGFGGPGGVGGLGGPGGFGPGGYPGGIHEV	3	16P:15.99	1.7e-12	59.5	1.02548	8.23261
a1	pepa1c103	20210219_Jamet_1_1_NP_A1	13469	2600.49	1364.69	FGGFGGPGGVGGLGGPGGFGPGGYPGGIHEVSVNQSLLQPLNVK	3		1e-15	70.4	-0.0138737	-3.39038
a1	pepa1c103	20210219_Jamet_1_2_NP_A6	14719	2492.83	1364.7	FGGFGGPGGVGGLGGPGGFGPGGYPGGIHEVSVNQSLLQPLNVK	3		7.3e-13	61.4	0.0058603	1.43211
a1	pepa1c103	20210219_Jamet_1_3_NP_A11	13308	2598.85	1364.7	FGGFGGPGGVGGLGGPGGFGPGGYPGGIHEVSVNQSLLQPLNVK	3		6.4e-12	55.8	-0.000288696	-0.0705501
a1	pepa1c104	20210219_Jamet_1_3_NP_A11	2922	848.617	787.002	FGGSGGRGSSSGGGYSSGSSSYGSGGR	3		1e-15	61.3	-0.000771422	-0.327013
a1	pepa1c104	20210219_Jamet_2_3_NP_C2	2848	855.321	787.003	FGGSGGRGSSSGGGYSSGSSSYGSGGR	3		7.1e-11	53.8	0.00112058	0.475024
a1	pepa1c104	20210219_Jamet_3_1_NP_C7	2852	842.27	787	FGGSGGRGSSSGGGYSSGSSSYGSGGR	3		7.2e-08	50.9	-0.00766442	-3.24902
a1	pepa1c105	20210219_Jamet_2_1_NP_B4	6775	1430.75	497.61	FLEQQNKLLETK	3		0.002	29.5	-0.00527267	-3.53676
a1	pepa1c105	20210219_Jamet_2_1_NP_B4	6787	1432.44	745.911	FLEQQNKLLETK	2		1.1e-12	73.3	-0.00684267	-4.58987
a1	pepa1c106	20210219_Jamet_1_3_NP_A11	4597	1115.7	503.272	FLEQQNKV	2		0.004	27.9	-7.60528e-05	-0.0756341
a1	pepa1c107	20210219_Jamet_1_1_NP_A1	5483	1245.96	731.897	FLEQQNKVLDTK	2		1.7e-10	69.6	-0.00327154	-2.23651
a1	pepa1c108	20210219_Jamet_1_1_NP_A1	5457	1242.52	492.939	FLEQQNKVLETK	3		1.9e-05	40.8	-0.00446461	-3.02315
a1	pepa1c108	20210219_Jamet_1_1_NP_A1	5465	1243.71	738.903	FLEQQNKVLETK	2		4.6e-11	68.8	-0.00648061	-4.38826
a1	pepa1c108	20210219_Jamet_1_3_NP_A11	5557	1254.77	492.94	FLEQQNKVLETK	3		0.0091	34.9	-0.000950607	-0.643691
a1	pepa1c108	20210219_Jamet_3_3_NP_D5	5449	1272.84	492.938	FLEQQNKVLETK	3		0.00047	34.9	-0.00510661	-3.45787
a1	pepa1c109	20210219_Jamet_1_1_NP_A1	6938	1454.3	738.883	FLEQQNQVLETK	2		1e-06	49.6	-0.0102891	-6.9673
a1	pepa1c109	20210219_Jamet_2_2_NP_B9	7058	1466.33	738.887	FLEQQNQVLETK	2		3.4e-05	46.3	-0.0023471	-1.58935
a1	pepa1c109	20210219_Jamet_2_3_NP_C2	6947	1464.88	738.889	FLEQQNQVLETK	2		2.2e-05	46.3	0.0010909	0.738709
a1	pepa1c110	20210219_Jamet_1_1_NP_A1	6612	1406.88	738.398	FLEQQNQVLQTK	2		3.3e-07	49.1	0.00264849	1.79463
a1	pepa1c110	20210219_Jamet_1_1_NP_A1	6630	1409.46	492.601	FLEQQNQVLQTK	3		3.6e-05	35.1	0.00234249	1.58728
a1	pepa1c110	20210219_Jamet_1_1_NP_A1	7247	1499.88	738.397	FLEQQNQVLQTK	2		0.00024	31.9	0.00225149	1.52562
a1	pepa1c110	20210219_Jamet_1_1_NP_A1	7602	1551.78	738.397	FLEQQNQVLQTK	2		2.6e-05	37.3	0.00109449	0.741629
a1	pepa1c110	20210219_Jamet_1_1_NP_A1	8310	1656.06	738.395	FLEQQNQVLQTK	2		8.3e-05	35.5	-0.00303551	-2.05688
a1	pepa1c110	20210219_Jamet_1_2_NP_A6	6871	1384.12	738.398	FLEQQNQVLQTK	2		3e-07	42.6	0.00424149	2.87405
a1	pepa1c110	20210219_Jamet_1_2_NP_A6	7074	1408.76	492.934	FLEQQNQVLQTK	3		0.00038	31.9	1.00274	-0.418321
a1	pepa1c110	20210219_Jamet_1_2_NP_A6	7285	1435.05	738.397	FLEQQNQVLQTK	2		8.1e-07	42.5	0.000665485	0.450936
a1	pepa1c110	20210219_Jamet_1_2_NP_A6	8260	1556.46	738.395	FLEQQNQVLQTK	2		0.00014	37.1	-0.00317351	-2.15039
a1	pepa1c110	20210219_Jamet_1_3_NP_A11	6670	1415.75	738.396	FLEQQNQVLQTK	2		6.4e-07	49.1	-0.000149515	-0.101312
a1	pepa1c110	20210219_Jamet_1_3_NP_A11	6692	1418.76	492.599	FLEQQNQVLQTK	3		2.3e-05	35.2	-0.00162751	-1.10281
a1	pepa1c110	20210219_Jamet_1_3_NP_A11	7011	1467.57	738.395	FLEQQNQVLQTK	2		1.2e-05	45.5	-0.00318451	-2.15784
a1	pepa1c110	20210219_Jamet_2_1_NP_B4	6674	1416.8	738.396	FLEQQNQVLQTK	2		4.3e-07	53.1	-0.000332515	-0.225314
a1	pepa1c110	20210219_Jamet_2_1_NP_B4	6690	1418.95	492.6	FLEQQNQVLQTK	3		4.8e-05	35.1	-0.000834515	-0.565472
a1	pepa1c110	20210219_Jamet_2_2_NP_B9	6712	1415.94	738.397	FLEQQNQVLQTK	2		1.5e-06	49.1	0.000999485	0.677257
a1	pepa1c110	20210219_Jamet_2_2_NP_B9	6735	1418.96	492.599	FLEQQNQVLQTK	3		1.5e-05	33.3	-0.00228651	-1.54935
a1	pepa1c110	20210219_Jamet_2_3_NP_C2	6598	1414.29	738.398	FLEQQNQVLQTK	2		1.3e-06	49.1	0.00265449	1.79869
a1	pepa1c110	20210219_Jamet_2_3_NP_C2	6618	1416.94	492.6	FLEQQNQVLQTK	3		0.0017	29.3	-0.000614515	-0.416398
a1	pepa1c110	20210219_Jamet_3_1_NP_C7	6615	1415.42	738.399	FLEQQNQVLQTK	2		2.2e-07	49.1	0.00494549	3.35109
a1	pepa1c110	20210219_Jamet_3_1_NP_C7	6631	1417.63	492.6	FLEQQNQVLQTK	3		0.00018	32	-0.000263515	-0.178559
a1	pepa1c110	20210219_Jamet_3_1_NP_C7	7306	1518.88	738.398	FLEQQNQVLQTK	2		1e-07	45.7	0.00348849	2.36382
a1	pepa1c110	20210219_Jamet_3_1_NP_C7	7706	1576.56	738.4	FLEQQNQVLQTK	2		0.00025	35	0.00812649	5.50655
a1	pepa1c110	20210219_Jamet_3_2_NP_C12	6579	1414.62	738.396	FLEQQNQVLQTK	2		2.2e-08	49.1	0.000148485	0.100614
a1	pepa1c110	20210219_Jamet_3_2_NP_C12	6594	1416.62	492.6	FLEQQNQVLQTK	3		2.4e-05	35.1	-0.000351515	-0.238188
a1	pepa1c110	20210219_Jamet_3_2_NP_C12	7268	1517.12	738.397	FLEQQNQVLQTK	2		3.4e-06	37.2	0.00234249	1.58728
a1	pepa1c110	20210219_Jamet_3_3_NP_D5	6515	1430.49	738.396	FLEQQNQVLQTK	2		1.1e-07	49	-2.35147e-05	-0.0159337
a1	pepa1c110	20210219_Jamet_3_3_NP_D5	6536	1433.51	492.601	FLEQQNQVLQTK	3		2.4e-05	32.1	0.00210449	1.42601
a1	pepa1c110	20210219_Jamet_3_3_NP_D5	7171	1532.24	738.395	FLEQQNQVLQTK	2		2.9e-06	38.4	-0.00347651	-2.3557
a1	pepa1c110	20210219_Jamet_3_3_NP_D5	7602	1597.34	738.397	FLEQQNQVLQTK	2		0.00085	27.6	0.00104549	0.708426
a1	pepa1c111	20210219_Jamet_1_2_NP_A6	7695	1486.39	738.889	FLEQQNQVLQTK	2	6N:0.98	1.4e-07	49.5	0.000657903	0.445501
a1	pepa1c111	20210219_Jamet_1_3_NP_A11	7398	1524.36	738.891	FLEQQNQVLQTK	2	5Q:0.98	6.4e-06	45.4	0.0047799	3.23673
a1	pepa1c111	20210219_Jamet_2_1_NP_B4	7008	1467.67	738.891	FLEQQNQVLQTK	2	5Q:0.98	3.6e-05	41	0.0064339	4.35674
a1	pepa1c111	20210219_Jamet_2_1_NP_B4	7374	1522.88	738.889	FLEQQNQVLQTK	2	5Q:0.98	4.1e-06	45.4	0.0014899	1.00889
a1	pepa1c111	20210219_Jamet_2_2_NP_B9	7479	1525.45	738.889	FLEQQNQVLQTK	2	5Q:0.98	1.1e-06	48.8	0.0024369	1.65016
a1	pepa1c111	20210219_Jamet_2_3_NP_C2	7339	1521.4	738.891	FLEQQNQVLQTK	2	5Q:0.98	3.3e-06	45.4	0.0060869	4.12177
a1	pepa1c111	20210219_Jamet_3_1_NP_C7	6951	1465.91	738.892	FLEQQNQVLQTK	2	5Q:0.98	2.7e-05	41	0.0071809	4.86258
a1	pepa1c111	20210219_Jamet_3_2_NP_C12	6913	1465.48	738.89	FLEQQNQVLQTK	2	7Q:0.98	6.9e-07	46.3	0.0028579	1.93524
a1	pepa1c111	20210219_Jamet_3_3_NP_D5	6832	1480.93	738.891	FLEQQNQVLQTK	2	6N:0.98	2.2e-05	43.5	0.0054989	3.7236
a1	pepa1c112	20210219_Jamet_1_1_NP_A1	11916	2279.35	978.173	FLEQQNQVLQTKWELLQQVDTSTR	3		1.7e-12	65.7	-0.0105958	-3.61322
a1	pepa1c112	20210219_Jamet_1_1_NP_A1	12163	2330.24	978.172	FLEQQNQVLQTKWELLQQVDTSTR	3		4.5e-11	67.7	-0.0152028	-5.18423
a1	pepa1c112	20210219_Jamet_1_3_NP_A11	12097	2341.85	978.178	FLEQQNQVLQTKWELLQQVDTSTR	3		5.7e-10	63.8	0.00177016	0.603633
a1	pepa1c112	20210219_Jamet_3_1_NP_C7	11802	2275.77	978.173	FLEQQNQVLQTKWELLQQVDTSTR	3		7.4e-11	61.4	-0.0106648	-3.63675
a1	pepa1c112	20210219_Jamet_3_2_NP_C12	11896	2278.73	978.174	FLEQQNQVLQTKWELLQQVDTSTR	3		9.6e-09	50	-0.00828284	-2.82448
a1	pepa1c113	20210219_Jamet_2_1_NP_B4	6722	1423.66	984.191	FLEQQNQVLQTKWELLQQVDTSTR	3	13W:15.99	0.00033	37.8	2.04618	13.3871
a1	pepa1c114	20210219_Jamet_1_2_NP_A6	11538	1985.06	984.167	FLEQQNQVLQTKWELLQQVDTSTR	3	6N:0.98 13W:15.99	0.0098	42.3	0.992444	-3.69923
a1	pepa1c115	20210219_Jamet_1_1_NP_A1	5278	1218.27	589.249	FSSCGGGGGSFGAGGGFGSR	3	4C:57.02	0.00011	28.4	-0.00312475	-1.76966
a1	pepa1c115	20210219_Jamet_1_1_NP_A1	6865	1443.35	883.37	FSSCGGGGGSFGAGGGFGSR	2	4C:57.02	1e-15	79.8	-0.00153075	-0.86692
a1	pepa1c115	20210219_Jamet_1_1_NP_A1	7202	1494.14	883.373	FSSCGGGGGSFGAGGGFGSR	2	4C:57.02	1e-15	74.6	0.00428525	2.42689
a1	pepa1c115	20210219_Jamet_1_1_NP_A1	7579	1548.68	883.371	FSSCGGGGGSFGAGGGFGSR	2	4C:57.02	1e-15	64.7	0.000763249	0.432256
a1	pepa1c115	20210219_Jamet_1_2_NP_A6	7384	1446.83	883.368	FSSCGGGGGSFGAGGGFGSR	2	4C:57.02	1e-15	79.8	-0.00562075	-3.18324
a1	pepa1c115	20210219_Jamet_1_2_NP_A6	7789	1497.96	883.372	FSSCGGGGGSFGAGGGFGSR	2	4C:57.02	1e-15	85.1	0.00125825	0.712592
a1	pepa1c115	20210219_Jamet_1_2_NP_A6	8352	1567.86	883.373	FSSCGGGGGSFGAGGGFGSR	2	4C:57.02	1e-15	74.6	0.00432625	2.45011
a1	pepa1c115	20210219_Jamet_1_3_NP_A11	6932	1453.21	883.366	FSSCGGGGGSFGAGGGFGSR	2	4C:57.02	7.3e-15	79.8	-0.00994275	-5.63094
a1	pepa1c115	20210219_Jamet_1_3_NP_A11	7263	1504.98	883.37	FSSCGGGGGSFGAGGGFGSR	2	4C:57.02	1e-15	79.9	-0.00267275	-1.51368
a1	pepa1c115	20210219_Jamet_1_3_NP_A11	8248	1650.44	883.379	FSSCGGGGGSFGAGGGFGSR	2	4C:57.02	0.00092	26.9	0.0155072	8.78232
a1	pepa1c115	20210219_Jamet_2_1_NP_B4	6916	1451.04	883.369	FSSCGGGGGSFGAGGGFGSR	2	4C:57.02	2.8e-15	79.7	-0.00361275	-2.04603
a1	pepa1c115	20210219_Jamet_2_1_NP_B4	7309	1513.29	883.369	FSSCGGGGGSFGAGGGFGSR	2	4C:57.02	2.8e-14	59.9	-0.00422675	-2.39376
a1	pepa1c115	20210219_Jamet_2_2_NP_B9	6977	1452.78	883.366	FSSCGGGGGSFGAGGGFGSR	2	4C:57.02	1e-15	85	-0.00956375	-5.4163
a1	pepa1c115	20210219_Jamet_2_3_NP_C2	6874	1452.26	883.367	FSSCGGGGGSFGAGGGFGSR	2	4C:57.02	1e-15	86.3	-0.00738875	-4.18452
a1	pepa1c115	20210219_Jamet_2_3_NP_C2	7234	1506.6	883.369	FSSCGGGGGSFGAGGGFGSR	2	4C:57.02	1.4e-11	69.7	-0.00462175	-2.61747
a1	pepa1c115	20210219_Jamet_3_1_NP_C7	6886	1454.04	883.368	FSSCGGGGGSFGAGGGFGSR	2	4C:57.02	4.9e-15	74.7	-0.00668275	-3.78469
a1	pepa1c115	20210219_Jamet_3_1_NP_C7	7228	1507.52	883.376	FSSCGGGGGSFGAGGGFGSR	2	4C:57.02	1e-15	74.7	0.00960725	5.44094
a1	pepa1c115	20210219_Jamet_3_1_NP_C7	7663	1570.53	883.373	FSSCGGGGGSFGAGGGFGSR	2	4C:57.02	1e-15	69.6	0.00416125	2.35667
a1	pepa1c115	20210219_Jamet_3_1_NP_C7	8136	1638.73	883.377	FSSCGGGGGSFGAGGGFGSR	2	4C:57.02	2.1e-06	35.3	0.0127362	7.213
a1	pepa1c115	20210219_Jamet_3_2_NP_C12	6838	1451.73	883.366	FSSCGGGGGSFGAGGGFGSR	2	4C:57.02	1e-15	85.1	-0.00977575	-5.53636
a1	pepa1c115	20210219_Jamet_3_2_NP_C12	7175	1503.82	883.372	FSSCGGGGGSFGAGGGFGSR	2	4C:57.02	1e-15	85	0.00115325	0.653127
a1	pepa1c115	20210219_Jamet_3_2_NP_C12	8096	1637.56	883.379	FSSCGGGGGSFGAGGGFGSR	2	4C:57.02	0.00017	31	0.0158552	8.97941
a1	pepa1c115	20210219_Jamet_3_3_NP_D5	6767	1466.3	883.367	FSSCGGGGGSFGAGGGFGSR	2	4C:57.02	1.8e-15	85	-0.00846775	-4.7956
a1	pepa1c115	20210219_Jamet_3_3_NP_D5	7069	1516.73	883.371	FSSCGGGGGSFGAGGGFGSR	2	4C:57.02	1.1e-15	74.6	-0.000483751	-0.273966
a1	pepa1c115	20210219_Jamet_3_3_NP_D5	7455	1576.29	883.37	FSSCGGGGGSFGAGGGFGSR	2	4C:57.02	1e-15	66	-0.00264975	-1.50065
a1	pepa1c115	20210219_Jamet_3_3_NP_D5	7902	1645.56	883.367	FSSCGGGGGSFGAGGGFGSR	2	4C:57.02	1e-15	64.8	-0.00897075	-5.08046
a1	pepa1c116	20210219_Jamet_2_2_NP_B9	3637	980.276	599.297	FSSGSAVVSGGSR	2		6.4e-09	42.4	0.000225572	0.188356
a1	pepa1c116	20210219_Jamet_3_2_NP_C12	3659	984.953	599.297	FSSGSAVVSGGSR	2		8.6e-07	38.3	0.00120457	1.00583
a1	pepa1c116	20210219_Jamet_3_3_NP_D5	3598	983.77	599.295	FSSGSAVVSGGSR	2		7.8e-07	38.2	-0.00226843	-1.89417
a1	pepa1c117	20210219_Jamet_1_3_NP_A11	2880	840.995	451.901	FSSGSAVVSGGSRR	3		8.5e-07	38	0.000718547	0.530807
a1	pepa1c117	20210219_Jamet_3_1_NP_C7	2839	840.003	451.9	FSSGSAVVSGGSRR	3		1.8e-06	35	-0.00247145	-1.82572
a1	pepa1c117	20210219_Jamet_3_2_NP_C12	2837	846.362	451.899	FSSGSAVVSGGSRR	3		1.3e-06	32.7	-0.00591745	-4.37136
a1	pepa1c117	20210219_Jamet_3_3_NP_D5	2846	855.187	451.899	FSSGSAVVSGGSRR	3		9.9e-07	32.8	-0.00358145	-2.6457
a1	pepa1c118	20210219_Jamet_1_1_NP_A1	5437	1239.57	609.309	FVSTTYSGVTR	2		0.00081	31.9	-0.00456193	-3.74661
a1	pepa1c118	20210219_Jamet_1_2_NP_A6	5631	1233.09	609.312	FVSTTYSGVTR	2		0.00051	31.9	-0.000338928	-0.278353
a1	pepa1c118	20210219_Jamet_1_3_NP_A11	5515	1248.61	609.311	FVSTTYSGVTR	2		0.00015	31.8	-0.00190993	-1.56858
a1	pepa1c118	20210219_Jamet_2_2_NP_B9	5472	1250.5	609.311	FVSTTYSGVTR	2		0.00095	31.8	-0.00230693	-1.89463
a1	pepa1c118	20210219_Jamet_3_1_NP_C7	5434	1246.44	609.31	FVSTTYSGVTR	2		5.7e-05	35.6	-0.00275393	-2.26174
a1	pepa1c118	20210219_Jamet_3_2_NP_C12	5401	1245.99	609.311	FVSTTYSGVTR	2		0.00044	31.9	-0.00218593	-1.79525
a1	pepa1c118	20210219_Jamet_3_3_NP_D5	5415	1267.92	609.311	FVSTTYSGVTR	2		6.8e-06	35.7	-0.000515928	-0.423719
a1	pepa1c119	20210219_Jamet_2_1_NP_B4	5007	1176.12	423.193	GFGSHSVCGGFR	3	8C:57.02	0.00054	25.8	0.00105931	0.835707
a1	pepa1c120	20210219_Jamet_1_3_NP_A11	6461	1383.28	473.586	GFSANSARLPGVSR	3		0.00021	32.6	-0.00602506	-4.24674
a1	pepa1c120	20210219_Jamet_2_2_NP_B9	6416	1375.38	709.879	GFSANSARLPGVSR	2		0.00016	35.5	0.00154794	1.09106
a1	pepa1c120	20210219_Jamet_2_3_NP_C2	6348	1378.58	473.588	GFSANSARLPGVSR	3		0.00036	32.5	-0.00160506	-1.13132
a1	pepa1c120	20210219_Jamet_3_1_NP_C7	6370	1378.85	473.587	GFSANSARLPGVSR	3		7.4e-06	36	-0.00422406	-2.97731
a1	pepa1c120	20210219_Jamet_3_3_NP_D5	6277	1394.01	473.587	GFSANSARLPGVSR	3		4.2e-05	35.7	-0.00255306	-1.79952
a1	pepa1c121	20210219_Jamet_1_3_NP_A11	6590	1403.62	464.583	GFSASSARLPGVSR	3		0.00083	30.9	-0.00359803	-2.58527
a1	pepa1c121	20210219_Jamet_3_3_NP_D5	6459	1422.55	464.585	GFSASSARLPGVSR	3		4.3e-05	33.6	0.000441973	0.317569
a1	pepa1c122	20210219_Jamet_1_1_NP_A1	4267	1070.88	627.806	GFSSGSAVVSGGSR	2		1.5e-11	55.1	-0.00351015	-2.79781
a1	pepa1c122	20210219_Jamet_1_1_NP_A1	4307	1076.65	418.873	GFSSGSAVVSGGSR	3		0.00015	36.2	-0.00192315	-1.53287
a1	pepa1c122	20210219_Jamet_1_2_NP_A6	4364	1071.34	627.805	GFSSGSAVVSGGSR	2		1.5e-07	52.4	-0.00382615	-3.04968
a1	pepa1c122	20210219_Jamet_1_3_NP_A11	4337	1074.76	627.807	GFSSGSAVVSGGSR	2		4.6e-08	50	-0.00157215	-1.2531
a1	pepa1c122	20210219_Jamet_1_3_NP_A11	4380	1080.74	418.873	GFSSGSAVVSGGSR	3		1.3e-05	38.8	-0.00200815	-1.60062
a1	pepa1c122	20210219_Jamet_2_1_NP_B4	4424	1082.33	627.804	GFSSGSAVVSGGSR	2		4.7e-08	52.4	-0.00632015	-5.03755
a1	pepa1c122	20210219_Jamet_2_2_NP_B9	4284	1076.91	627.805	GFSSGSAVVSGGSR	2		1.2e-06	43.6	-0.00491615	-3.91848
a1	pepa1c122	20210219_Jamet_2_3_NP_C2	4258	1080.81	627.805	GFSSGSAVVSGGSR	2		1.9e-06	48	-0.00415715	-3.31351
a1	pepa1c122	20210219_Jamet_3_1_NP_C7	4328	1079.23	627.806	GFSSGSAVVSGGSR	2		1.6e-06	45.6	-0.00300415	-2.39449
a1	pepa1c122	20210219_Jamet_3_2_NP_C12	4290	1079.02	627.806	GFSSGSAVVSGGSR	2		1.7e-10	52.2	-0.00171915	-1.37027
a1	pepa1c122	20210219_Jamet_3_3_NP_D5	4252	1084.06	627.806	GFSSGSAVVSGGSR	2		5.6e-08	52.3	-0.00325915	-2.59774
a1	pepa1c122	20210219_Jamet_3_3_NP_D5	4279	1088.77	418.872	GFSSGSAVVSGGSR	3		3.4e-05	29	-0.00446115	-3.55581
a1	pepa1c123	20210219_Jamet_1_1_NP_A1	3276	921.212	705.857	GFSSGSAVVSGGSRR	2		7.7e-11	69.5	-0.00192917	-1.36752
a1	pepa1c123	20210219_Jamet_1_1_NP_A1	3354	933.344	470.908	GFSSGSAVVSGGSRR	3		0.0015	36.2	0.000869826	0.616588
a1	pepa1c123	20210219_Jamet_1_2_NP_A6	3288	914.878	470.907	GFSSGSAVVSGGSRR	3		8.9e-07	39	-0.00138617	-0.982609
a1	pepa1c123	20210219_Jamet_1_2_NP_A6	3301	916.955	705.856	GFSSGSAVVSGGSRR	2		2.9e-11	57.1	-0.00317417	-2.25006
a1	pepa1c123	20210219_Jamet_1_3_NP_A11	3416	929.836	705.86	GFSSGSAVVSGGSRR	2		1.6e-14	64	0.00391083	2.77224
a1	pepa1c123	20210219_Jamet_1_3_NP_A11	3419	930.432	470.908	GFSSGSAVVSGGSRR	3		7.2e-08	42	0.000310826	0.220333
a1	pepa1c123	20210219_Jamet_2_1_NP_B4	3464	936.786	470.908	GFSSGSAVVSGGSRR	3		1.4e-05	42	0.00111683	0.791677
a1	pepa1c123	20210219_Jamet_2_2_NP_B9	3311	929.452	470.908	GFSSGSAVVSGGSRR	3		1e-06	39	0.00133183	0.944083
a1	pepa1c123	20210219_Jamet_2_2_NP_B9	3328	932.305	705.858	GFSSGSAVVSGGSRR	2		6.6e-08	58.5	0.000922826	0.654158
a1	pepa1c123	20210219_Jamet_2_3_NP_C2	3344	944.893	470.908	GFSSGSAVVSGGSRR	3		6.3e-06	42.7	0.00113983	0.807981
a1	pepa1c123	20210219_Jamet_2_3_NP_C2	3349	945.71	705.858	GFSSGSAVVSGGSRR	2		2.7e-09	54.9	0.000541826	0.38408
a1	pepa1c123	20210219_Jamet_3_1_NP_C7	3361	926.4	470.909	GFSSGSAVVSGGSRR	3		1e-07	42.8	0.00536683	3.80435
a1	pepa1c123	20210219_Jamet_3_1_NP_C7	3368	927.364	705.858	GFSSGSAVVSGGSRR	2		2.9e-11	64.9	-0.000412174	-0.292176
a1	pepa1c123	20210219_Jamet_3_2_NP_C12	3352	935.499	470.908	GFSSGSAVVSGGSRR	3		2.2e-07	38.9	0.00105483	0.747728
a1	pepa1c123	20210219_Jamet_3_2_NP_C12	3368	938.104	705.858	GFSSGSAVVSGGSRR	2		1.1e-10	56.8	0.000371826	0.263574
a1	pepa1c123	20210219_Jamet_3_3_NP_D5	3348	942.255	470.908	GFSSGSAVVSGGSRR	3		1.4e-09	42.6	0.000703826	0.498916
a1	pepa1c123	20210219_Jamet_3_3_NP_D5	3366	945.285	705.857	GFSSGSAVVSGGSRR	2		1.6e-05	45.4	-0.000793174	-0.562253
a1	pepa1c124	20210219_Jamet_1_1_NP_A1	4695	1136.27	463.239	GFSSVSVSR	2		0.0005	30.9	-0.00295029	-3.18788
a1	pepa1c124	20210219_Jamet_1_3_NP_A11	4738	1138.52	463.239	GFSSVSVSR	2		0.0019	30.8	-0.00323629	-3.49691
a1	pepa1c124	20210219_Jamet_2_2_NP_B9	4690	1144.7	463.24	GFSSVSVSR	2		2.5e-05	30.8	-0.000288295	-0.311511
a1	pepa1c124	20210219_Jamet_3_1_NP_C7	4692	1139.45	463.239	GFSSVSVSR	2		0.0035	23.8	-0.00237229	-2.56333
a1	pepa1c124	20210219_Jamet_3_2_NP_C12	4662	1140.82	463.241	GFSSVSVSR	2		4e-05	30.8	0.000743705	0.803594
a1	pepa1c125	20210219_Jamet_3_3_NP_D5	5376	1262.45	506.734	GGGFGGGGFGSR	2		6.4e-05	38.7	0.00126729	1.25169
a1	pepa1c126	20210219_Jamet_1_3_NP_A11	6385	1371.9	562.763	GGGGFGAAGGFGGR	2		0.00063	28.9	-0.0036856	-3.27748
a1	pepa1c126	20210219_Jamet_3_2_NP_C12	6279	1370.15	562.764	GGGGFGAAGGFGGR	2		0.00017	28.4	-0.0023096	-2.05385
a1	pepa1c127	20210219_Jamet_1_3_NP_A11	6303	1359.98	591.275	GGGGGFGAAGGFGGR	2		1.2e-08	50.4	-0.00162532	-1.37559
a1	pepa1c127	20210219_Jamet_2_1_NP_B4	6308	1362.65	591.277	GGGGGFGAAGGFGGR	2		8.6e-08	47.9	0.00186368	1.57732
a1	pepa1c127	20210219_Jamet_2_2_NP_B9	6335	1364.24	591.275	GGGGGFGAAGGFGGR	2		5.4e-08	50.3	-0.00137932	-1.16739
a1	pepa1c127	20210219_Jamet_3_1_NP_C7	6258	1362.49	591.276	GGGGGFGAAGGFGGR	2		8e-08	50.3	-0.000819321	-0.693432
a1	pepa1c127	20210219_Jamet_3_2_NP_C12	6211	1360.26	591.274	GGGGGFGAAGGFGGR	2		2.2e-09	53.2	-0.00453032	-3.83424
a1	pepa1c127	20210219_Jamet_3_3_NP_D5	6160	1376.99	591.278	GGGGGFGAAGGFGGR	2		1.2e-06	46	0.00403768	3.41729
a1	pepa1c128	20210219_Jamet_1_1_NP_A1	6293	1361.15	633.975	GGGGGGFRGFSSGSAVVSGGSR	3		1e-15	89.4	0.00428258	2.2541
a1	pepa1c128	20210219_Jamet_1_2_NP_A6	6621	1355.18	633.975	GGGGGGFRGFSSGSAVVSGGSR	3		1e-15	85.4	0.00584858	3.07836
a1	pepa1c128	20210219_Jamet_1_3_NP_A11	6378	1370.92	633.974	GGGGGGFRGFSSGSAVVSGGSR	3		1e-15	98.1	0.00275058	1.44775
a1	pepa1c128	20210219_Jamet_1_3_NP_A11	6403	1374.62	950.457	GGGGGGFRGFSSGSAVVSGGSR	2		3e-14	64.1	0.000539585	0.284006
a1	pepa1c128	20210219_Jamet_2_2_NP_B9	6316	1361.79	633.972	GGGGGGFRGFSSGSAVVSGGSR	3		1.1e-14	76.7	-0.00506242	-2.66456
a1	pepa1c128	20210219_Jamet_2_2_NP_B9	6348	1366.13	950.455	GGGGGGFRGFSSGSAVVSGGSR	2		1.6e-11	59.6	-0.00259542	-1.36608
a1	pepa1c128	20210219_Jamet_2_3_NP_C2	6268	1368.54	633.975	GGGGGGFRGFSSGSAVVSGGSR	3		1e-15	81.1	0.00472158	2.48517
a1	pepa1c128	20210219_Jamet_3_1_NP_C7	6301	1368.66	633.971	GGGGGGFRGFSSGSAVVSGGSR	3		1e-15	81	-0.00776142	-4.08516
a1	pepa1c128	20210219_Jamet_3_2_NP_C12	6270	1368.79	633.973	GGGGGGFRGFSSGSAVVSGGSR	3		1e-15	81	-0.000451415	-0.237599
a1	pepa1c128	20210219_Jamet_3_3_NP_D5	6241	1388.81	633.974	GGGGGGFRGFSSGSAVVSGGSR	3		1e-15	97.1	0.00146958	0.773504
a1	pepa1c129	20210219_Jamet_1_3_NP_A11	5892	1300.6	686.009	GGGGGGFRGFSSGSAVVSGGSRR	3		1e-15	70	0.00432156	2.10192
a1	pepa1c129	20210219_Jamet_2_2_NP_B9	5470	1250.21	686.006	GGGGGGFRGFSSGSAVVSGGSRR	3		2.6e-10	57.5	-0.00419644	-2.04106
a1	pepa1c129	20210219_Jamet_2_3_NP_C2	5416	1250.45	686.007	GGGGGGFRGFSSGSAVVSGGSRR	3		7.6e-12	61.7	-0.00132944	-0.646613
a1	pepa1c129	20210219_Jamet_3_2_NP_C12	5688	1286.2	686.007	GGGGGGFRGFSSGSAVVSGGSRR	3		6e-11	77.2	-0.00130344	-0.633967
a1	pepa1c129	20210219_Jamet_3_3_NP_D5	5899	1337.8	686.005	GGGGGGFRGFSSGSAVVSGGSRR	3		1.6e-10	60.3	-0.00599544	-2.91606
a1	pepa1c130	20210219_Jamet_1_3_NP_A11	4875	1158.74	842.829	GGGGGGYGSGGSSYGSGGGSY	2		7.8e-07	43.2	0.00302031	1.79285
a1	pepa1c131	20210219_Jamet_1_1_NP_A1	2382	754.066	795.322	GGGGGGYGSGGSSYGSGGGSYGSGGGGGGGR	3		2.5e-10	68.9	-0.00123889	-0.519677
a1	pepa1c131	20210219_Jamet_1_1_NP_A1	3208	909.29	795.321	GGGGGGYGSGGSSYGSGGGSYGSGGGGGGGR	3		3.2e-14	80.5	-0.00262389	-1.10065
a1	pepa1c131	20210219_Jamet_1_1_NP_A1	3209	909.363	1192.48	GGGGGGYGSGGSSYGSGGGSYGSGGGGGGGR	2		1e-15	121.6	-0.00123789	-0.519258
a1	pepa1c131	20210219_Jamet_1_2_NP_A6	2391	752.602	795.323	GGGGGGYGSGGSSYGSGGGSYGSGGGGGGGR	3		0.00027	43.4	0.00137911	0.578499
a1	pepa1c131	20210219_Jamet_1_2_NP_A6	3270	911.864	1192.48	GGGGGGYGSGGSSYGSGGGSYGSGGGGGGGR	2		1e-15	121.5	-0.00163089	-0.68411
a1	pepa1c131	20210219_Jamet_1_2_NP_A6	3272	912.23	795.319	GGGGGGYGSGGSSYGSGGGSYGSGGGGGGGR	3		9.9e-15	85	-0.00823589	-3.45472
a1	pepa1c131	20210219_Jamet_1_3_NP_A11	2505	767.935	795.322	GGGGGGYGSGGSSYGSGGGSYGSGGGGGGGR	3		1.5e-10	58.8	0.000318115	0.13344
a1	pepa1c131	20210219_Jamet_1_3_NP_A11	3321	912.994	795.322	GGGGGGYGSGGSSYGSGGGSYGSGGGGGGGR	3		2e-15	86.3	-0.00103189	-0.432847
a1	pepa1c131	20210219_Jamet_1_3_NP_A11	3328	914.109	1192.48	GGGGGGYGSGGSSYGSGGGSYGSGGGGGGGR	2		1e-15	118.2	-0.000224885	-0.0943331
a1	pepa1c131	20210219_Jamet_1_3_NP_A11	3665	969.661	795.322	GGGGGGYGSGGSSYGSGGGSYGSGGGGGGGR	3		3.9e-14	76.2	-0.00180089	-0.75542
a1	pepa1c131	20210219_Jamet_2_1_NP_B4	2472	771.329	795.323	GGGGGGYGSGGSSYGSGGGSYGSGGGGGGGR	3		2e-06	51.7	0.00273311	1.14646
a1	pepa1c131	20210219_Jamet_2_1_NP_B4	3288	908.982	795.32	GGGGGGYGSGGSSYGSGGGSYGSGGGGGGGR	3		1.2e-13	80.2	-0.00687989	-2.88592
a1	pepa1c131	20210219_Jamet_2_1_NP_B4	3303	911.396	1192.48	GGGGGGYGSGGSSYGSGGGSYGSGGGGGGGR	2		1e-15	125.2	-0.00102389	-0.429491
a1	pepa1c131	20210219_Jamet_2_2_NP_B9	2392	759.068	795.321	GGGGGGYGSGGSSYGSGGGSYGSGGGGGGGR	3		8e-12	71	-0.00242689	-1.01801
a1	pepa1c131	20210219_Jamet_2_2_NP_B9	3253	918.729	795.323	GGGGGGYGSGGSSYGSGGGSYGSGGGGGGGR	3		4.7e-12	77.8	0.00154811	0.64939
a1	pepa1c131	20210219_Jamet_2_2_NP_B9	3254	918.882	1192.48	GGGGGGYGSGGSSYGSGGGSYGSGGGGGGGR	2		1e-15	137.3	0.00542211	2.27442
a1	pepa1c131	20210219_Jamet_2_3_NP_C2	2451	775.238	795.322	GGGGGGYGSGGSSYGSGGGSYGSGGGGGGGR	3		0.0053	30.5	0.000280115	0.1175
a1	pepa1c131	20210219_Jamet_2_3_NP_C2	3270	930.725	795.321	GGGGGGYGSGGSSYGSGGGSYGSGGGGGGGR	3		1e-15	83.8	-0.00346489	-1.45342
a1	pepa1c131	20210219_Jamet_2_3_NP_C2	3277	931.784	1192.48	GGGGGGYGSGGSSYGSGGGSYGSGGGGGGGR	2		1e-15	116	-0.00175589	-0.736544
a1	pepa1c131	20210219_Jamet_3_1_NP_C7	2451	765.191	795.323	GGGGGGYGSGGSSYGSGGGSYGSGGGGGGGR	3		7.7e-07	49.9	0.00220711	0.925822
a1	pepa1c131	20210219_Jamet_3_1_NP_C7	3295	915.955	1192.48	GGGGGGYGSGGSSYGSGGGSYGSGGGGGGGR	2		1e-15	121.6	-0.00478389	-2.0067
a1	pepa1c131	20210219_Jamet_3_1_NP_C7	3299	916.543	795.321	GGGGGGYGSGGSSYGSGGGSYGSGGGGGGGR	3		2e-13	79.3	-0.00276389	-1.15937
a1	pepa1c131	20210219_Jamet_3_2_NP_C12	2442	768.448	795.323	GGGGGGYGSGGSSYGSGGGSYGSGGGGGGGR	3		5.3e-07	44.5	0.00207611	0.870871
a1	pepa1c131	20210219_Jamet_3_2_NP_C12	3257	919.792	795.322	GGGGGGYGSGGSSYGSGGGSYGSGGGGGGGR	3		1.6e-13	76.6	0.000145115	0.0608714
a1	pepa1c131	20210219_Jamet_3_2_NP_C12	3266	921.098	1192.48	GGGGGGYGSGGSSYGSGGGSYGSGGGGGGGR	2		1e-15	121.5	-0.00202389	-0.848962
a1	pepa1c131	20210219_Jamet_3_2_NP_C12	3641	982.285	795.324	GGGGGGYGSGGSSYGSGGGSYGSGGGGGGGR	3		1.8e-10	58.8	0.00474111	1.98876
a1	pepa1c131	20210219_Jamet_3_3_NP_D5	2416	768.31	795.323	GGGGGGYGSGGSSYGSGGGSYGSGGGGGGGR	3		3.9e-07	49	0.00116311	0.487893
a1	pepa1c131	20210219_Jamet_3_3_NP_D5	3195	915.943	795.322	GGGGGGYGSGGSSYGSGGGSYGSGGGGGGGR	3		8e-14	81.4	-0.000331885	-0.139217
a1	pepa1c131	20210219_Jamet_3_3_NP_D5	3202	917.06	1192.48	GGGGGGYGSGGSSYGSGGGSYGSGGGGGGGR	2		1e-15	121.5	0.00223011	0.93547
a1	pepa1c131	20210219_Jamet_3_3_NP_D5	3490	965.963	795.322	GGGGGGYGSGGSSYGSGGGSYGSGGGGGGGR	3		2.8e-10	63.4	0.000454115	0.190488
a1	pepa1c132	20210219_Jamet_1_3_NP_A11	3300	909.928	1220.99	GGGGGGYGSGGSSYGSGGGSYGSGGGGGGGRG	2		1e-15	77.8	-0.00245061	-1.00395
a1	pepa1c132	20210219_Jamet_1_3_NP_A11	3316	912.233	814.328	GGGGGGYGSGGSSYGSGGGSYGSGGGGGGGRG	3		2.5e-09	62.3	-0.00430061	-1.76184
a1	pepa1c132	20210219_Jamet_2_2_NP_B9	3242	917.055	814.328	GGGGGGYGSGGSSYGSGGGSYGSGGGGGGGRG	3		3.9e-12	62.2	-0.00455561	-1.86631
a1	pepa1c132	20210219_Jamet_3_3_NP_D5	3181	913.312	814.329	GGGGGGYGSGGSSYGSGGGSYGSGGGGGGGRG	3		5.5e-11	58.5	-0.00234861	-0.96216
a1	pepa1c133	20210219_Jamet_1_1_NP_A1	5444	1240.75	642.788	GGGGGSFGAGGGFGSR	2		9.1e-09	54.8	-0.00212735	-1.65607
a1	pepa1c133	20210219_Jamet_1_2_NP_A6	5704	1242.42	642.791	GGGGGSFGAGGGFGSR	2		9.5e-08	50.3	0.00267165	2.0798
a1	pepa1c133	20210219_Jamet_1_3_NP_A11	5527	1250.46	642.788	GGGGGSFGAGGGFGSR	2		8.8e-09	57.5	-0.00203035	-1.58056
a1	pepa1c133	20210219_Jamet_2_1_NP_B4	5531	1251.16	642.791	GGGGGSFGAGGGFGSR	2		6.2e-11	50.3	0.00279565	2.17633
a1	pepa1c133	20210219_Jamet_2_2_NP_B9	5500	1254.55	642.788	GGGGGSFGAGGGFGSR	2		6.6e-11	54.8	-0.00225035	-1.75183
a1	pepa1c133	20210219_Jamet_2_3_NP_C2	5434	1252.97	642.791	GGGGGSFGAGGGFGSR	2		3.2e-07	50.3	0.00289765	2.25574
a1	pepa1c133	20210219_Jamet_3_1_NP_C7	5459	1250.06	642.788	GGGGGSFGAGGGFGSR	2		1.5e-10	54.8	-0.00318335	-2.47814
a1	pepa1c133	20210219_Jamet_3_2_NP_C12	5416	1248.39	642.788	GGGGGSFGAGGGFGSR	2		1.8e-09	50.3	-0.00329235	-2.56299
a1	pepa1c133	20210219_Jamet_3_3_NP_D5	5407	1266.85	642.789	GGGGGSFGAGGGFGSR	2		6.2e-10	54.8	-0.000990345	-0.770954
a1	pepa1c134	20210219_Jamet_1_1_NP_A1	5472	1244.52	614.277	GGGGSFGAGGGFGSR	2		4.2e-08	50.1	-0.00308962	-2.5169
a1	pepa1c134	20210219_Jamet_1_2_NP_A6	5725	1245.24	614.279	GGGGSFGAGGGFGSR	2		5.7e-07	45.9	0.000502376	0.409251
a1	pepa1c134	20210219_Jamet_1_3_NP_A11	5575	1257.38	614.278	GGGGSFGAGGGFGSR	2		9.2e-09	45.8	-0.000977624	-0.796403
a1	pepa1c134	20210219_Jamet_2_1_NP_B4	5579	1258.13	614.279	GGGGSFGAGGGFGSR	2		3.4e-07	45.9	0.00153238	1.24832
a1	pepa1c134	20210219_Jamet_3_1_NP_C7	5480	1252.9	614.277	GGGGSFGAGGGFGSR	2		6.6e-08	50.2	-0.00245662	-2.00124
a1	pepa1c134	20210219_Jamet_3_2_NP_C12	5451	1253.52	614.277	GGGGSFGAGGGFGSR	2		2.1e-07	47.8	-0.00309762	-2.52342
a1	pepa1c134	20210219_Jamet_3_3_NP_D5	5431	1270.22	614.278	GGGGSFGAGGGFGSR	2		1.2e-06	50.2	-0.00173262	-1.41145
a1	pepa1c135	20210219_Jamet_1_2_NP_A6	6850	1381.53	720.346	GGGLSVGGSGFSASSGR	2		2.2e-07	51.2	-0.00307538	-2.13614
a1	pepa1c136	20210219_Jamet_1_2_NP_A6	5750	1248.49	585.768	GGGSFGAGGGFGSR	2		6.7e-07	35.3	-0.000404903	-0.345915
a1	pepa1c136	20210219_Jamet_3_2_NP_C12	5483	1258.25	585.767	GGGSFGAGGGFGSR	2		2.4e-08	43.4	-0.000941903	-0.804682
a1	pepa1c136	20210219_Jamet_3_3_NP_D5	5487	1278.07	585.768	GGGSFGAGGGFGSR	2		7.2e-09	43.4	-0.000236903	-0.20239
a1	pepa1c137	20210219_Jamet_1_1_NP_A1	7912	1596.05	794.849	GGGSGFSGGGFGGGGFGGGR	2		9.1e-13	69.7	0.00145064	0.913106
a1	pepa1c137	20210219_Jamet_1_3_NP_A11	7934	1602.51	794.848	GGGSGFSGGGFGGGGFGGGR	2		1.7e-13	69.8	-0.000637359	-0.401185
a1	pepa1c137	20210219_Jamet_2_1_NP_B4	7892	1598.74	794.847	GGGSGFSGGGFGGGGFGGGR	2		4.3e-15	69.8	-0.00199136	-1.25346
a1	pepa1c137	20210219_Jamet_2_2_NP_B9	8044	1601.47	794.847	GGGSGFSGGGFGGGGFGGGR	2		3e-12	69.8	-0.00241336	-1.51909
a1	pepa1c137	20210219_Jamet_2_3_NP_C2	7922	1603.37	794.847	GGGSGFSGGGFGGGGFGGGR	2		1.2e-12	69.8	-0.00243936	-1.53545
a1	pepa1c137	20210219_Jamet_3_1_NP_C7	7865	1600.14	794.846	GGGSGFSGGGFGGGGFGGGR	2		4.9e-12	69.8	-0.00477436	-3.00522
a1	pepa1c137	20210219_Jamet_3_2_NP_C12	7827	1598.1	794.847	GGGSGFSGGGFGGGGFGGGR	2		5.3e-12	69.7	-0.00225636	-1.42026
a1	pepa1c137	20210219_Jamet_3_3_NP_D5	7735	1616.81	794.847	GGGSGFSGGGFGGGGFGGGR	2		4.6e-13	69.8	-0.00250936	-1.57952
a1	pepa1c138	20210219_Jamet_3_2_NP_C12	2675	816.178	933.388	GGGSRGGGGGGYGSGGSSYGSGGGSYGSGGGGGGGR	3		7.1e-10	45.2	0.000958521	0.342555
a1	pepa1c138	20210219_Jamet_3_3_NP_D5	2658	818.433	933.387	GGGSRGGGGGGYGSGGSSYGSGGGSYGSGGGGGGGR	3		5e-15	62.7	-0.00166548	-0.595207
a1	pepa1c139	20210219_Jamet_1_1_NP_A1	2378	753.399	755.977	GGGSYGSGGGGGGHGSYGSGSSSGGYR	3		2.1e-14	77.9	0.00251618	1.11045
a1	pepa1c139	20210219_Jamet_1_2_NP_A6	2342	743.23	755.976	GGGSYGSGGGGGGHGSYGSGSSSGGYR	3		3e-11	57	0.000454176	0.200438
a1	pepa1c139	20210219_Jamet_1_3_NP_A11	2464	760.789	755.975	GGGSYGSGGGGGGHGSYGSGSSSGGYR	3		1e-15	75.9	-0.00223682	-0.987162
a1	pepa1c139	20210219_Jamet_2_2_NP_B9	2386	758.098	755.975	GGGSYGSGGGGGGHGSYGSGSSSGGYR	3		1.3e-15	72.8	-0.00318382	-1.40509
a1	pepa1c139	20210219_Jamet_2_3_NP_C2	2467	778.858	755.976	GGGSYGSGGGGGGHGSYGSGSSSGGYR	3		6.9e-11	63	0.000904176	0.399034
a1	pepa1c139	20210219_Jamet_3_1_NP_C7	2417	758.912	755.975	GGGSYGSGGGGGGHGSYGSGSSSGGYR	3		2.7e-11	68.6	-0.00396282	-1.74889
a1	pepa1c139	20210219_Jamet_3_2_NP_C12	2444	768.99	755.976	GGGSYGSGGGGGGHGSYGSGSSSGGYR	3		1.8e-12	73.2	-0.00153482	-0.677353
a1	pepa1c139	20210219_Jamet_3_3_NP_D5	2431	771.192	755.977	GGGSYGSGGGGGGHGSYGSGSSSGGYR	3		5.9e-15	63	0.00337918	1.49131
a1	pepa1c140	20210219_Jamet_1_1_NP_A1	5460	1242.89	557.256	GGSFGAGGGFGSR	2		2.6e-07	41.6	-0.00252218	-2.26508
a1	pepa1c140	20210219_Jamet_1_2_NP_A6	5740	1247.24	557.258	GGSFGAGGGFGSR	2		1e-06	36.2	0.00186782	1.67742
a1	pepa1c140	20210219_Jamet_1_3_NP_A11	5533	1251.42	557.256	GGSFGAGGGFGSR	2		1.6e-06	41.6	-0.00232318	-2.08636
a1	pepa1c141	20210219_Jamet_1_3_NP_A11	7991	1610.77	766.338	GGSGFSGGGFGGGGFGGGR	2		5.7e-13	55.9	0.00201036	1.31253
a1	pepa1c141	20210219_Jamet_3_3_NP_D5	7805	1629.17	766.335	GGSGFSGGGFGGGGFGGGR	2		2.3e-14	62.3	-0.00374564	-2.44546
a1	pepa1c142	20210219_Jamet_1_3_NP_A11	1315	467.35	693.976	GGSGGGGGGSSGGRGSGGGSSGGSIGGR	3		0.0023	24.4	0.00016647	0.0800371
a1	pepa1c143	20210219_Jamet_1_1_NP_A1	2491	779.544	871.376	GGSGGGGSISGGGYGSGGGSGGR	2		1e-15	84	-0.00291406	-1.67307
a1	pepa1c143	20210219_Jamet_1_1_NP_A1	2503	782.143	581.254	GGSGGGGSISGGGYGSGGGSGGR	3		1.5e-05	39.1	-0.000203065	-0.116587
a1	pepa1c143	20210219_Jamet_1_2_NP_A6	2511	776.195	871.377	GGSGGGGSISGGGYGSGGGSGGR	2		1.4e-08	46.9	-0.000729065	-0.418582
a1	pepa1c143	20210219_Jamet_1_3_NP_A11	2575	783.022	871.381	GGSGGGGSISGGGYGSGGGSGGR	2		1e-15	80.7	0.00565994	3.24957
a1	pepa1c143	20210219_Jamet_1_3_NP_A11	2603	787.927	581.255	GGSGGGGSISGGGYGSGGGSGGR	3		0.00015	49.5	0.000707935	0.406451
a1	pepa1c143	20210219_Jamet_1_3_NP_A11	2839	833.898	871.378	GGSGGGGSISGGGYGSGGGSGGR	2		1.1e-14	74.8	7.69353e-05	0.0441713
a1	pepa1c143	20210219_Jamet_2_1_NP_B4	2547	784.997	871.378	GGSGGGGSISGGGYGSGGGSGGR	2		2.7e-15	72.6	-0.000189065	-0.108549
a1	pepa1c143	20210219_Jamet_2_2_NP_B9	2541	790.93	581.254	GGSGGGGSISGGGYGSGGGSGGR	3		6.1e-05	30.7	-0.000143065	-0.0821385
a1	pepa1c143	20210219_Jamet_2_2_NP_B9	2545	791.6	871.378	GGSGGGGSISGGGYGSGGGSGGR	2		1e-15	94.2	0.000118935	0.068285
a1	pepa1c143	20210219_Jamet_2_3_NP_C2	2545	797.166	581.255	GGSGGGGSISGGGYGSGGGSGGR	3		0.00036	35.5	0.00132894	0.762989
a1	pepa1c143	20210219_Jamet_2_3_NP_C2	2654	818.392	871.376	GGSGGGGSISGGGYGSGGGSGGR	2		4.6e-10	57.8	-0.00300506	-1.72531
a1	pepa1c143	20210219_Jamet_3_1_NP_C7	2536	781.695	581.253	GGSGGGGSISGGGYGSGGGSGGR	3		0.00019	31.9	-0.00503506	-2.89081
a1	pepa1c143	20210219_Jamet_3_1_NP_C7	2584	791.739	871.378	GGSGGGGSISGGGYGSGGGSGGR	2		1e-15	82.5	-0.000280065	-0.160795
a1	pepa1c143	20210219_Jamet_3_2_NP_C12	2516	785.766	871.378	GGSGGGGSISGGGYGSGGGSGGR	2		9.7e-15	77.5	-2.00647e-05	-0.0115198
a1	pepa1c143	20210219_Jamet_3_2_NP_C12	2529	788.685	581.253	GGSGGGGSISGGGYGSGGGSGGR	3		0.001	35.8	-0.00255206	-1.46523
a1	pepa1c143	20210219_Jamet_3_2_NP_C12	2794	838.425	871.379	GGSGGGGSISGGGYGSGGGSGGR	2		4e-06	37	0.00159494	0.915709
a1	pepa1c143	20210219_Jamet_3_3_NP_D5	2491	783.992	871.381	GGSGGGGSISGGGYGSGGGSGGR	2		1.1e-07	42.6	0.00624794	3.58716
a1	pepa1c143	20210219_Jamet_3_3_NP_D5	2516	790.07	581.254	GGSGGGGSISGGGYGSGGGSGGR	3		0.0067	26.3	-7.40647e-05	-0.0425232
a1	pepa1c144	20210219_Jamet_1_3_NP_A11	2064	683.945	702.637	GGSGGGGSISGGGYGSGGGSGGRYGSG	3		1e-06	35.8	0.0109616	5.2052
a1	pepa1c144	20210219_Jamet_2_2_NP_B9	2019	682.221	702.637	GGSGGGGSISGGGYGSGGGSGGRYGSG	3		0.00015	26.5	0.0100026	4.74981
a1	pepa1c144	20210219_Jamet_3_2_NP_C12	2048	690.222	702.638	GGSGGGGSISGGGYGSGGGSGGRYGSG	3		5.4e-07	29.5	0.0113036	5.3676
a1	pepa1c145	20210219_Jamet_2_3_NP_C2	2677	822.36	812.357	GGSGGGGSISGGGYGSGGGSGGRYGSGGGSK	3		1e-15	118.5	0.000404691	0.166194
a1	pepa1c146	20210219_Jamet_1_1_NP_A1	4308	1076.72	387.891	GGSKSISISVAR	3		0.0017	31.2	0.000351553	0.302631
a1	pepa1c146	20210219_Jamet_1_1_NP_A1	4322	1078.57	581.332	GGSKSISISVAR	2		3.8e-07	49.4	-0.00246145	-2.11891
a1	pepa1c146	20210219_Jamet_1_3_NP_A11	4376	1080.28	387.891	GGSKSISISVAR	3		0.0004	31.2	0.000693553	0.597037
a1	pepa1c146	20210219_Jamet_1_3_NP_A11	4387	1081.78	581.333	GGSKSISISVAR	2		1.4e-08	53.7	-0.000503447	-0.433386
a1	pepa1c146	20210219_Jamet_2_1_NP_B4	4475	1090.27	581.329	GGSKSISISVAR	2		3.2e-09	46.6	-0.00775545	-6.67618
a1	pepa1c146	20210219_Jamet_2_2_NP_B9	4293	1078.47	581.332	GGSKSISISVAR	2		1.4e-08	52.5	-0.00174945	-1.50599
a1	pepa1c146	20210219_Jamet_2_3_NP_C2	4264	1081.92	581.332	GGSKSISISVAR	2		4.3e-07	46.7	-0.000925447	-0.79666
a1	pepa1c146	20210219_Jamet_3_1_NP_C7	4317	1077.21	581.33	GGSKSISISVAR	2		2e-07	46.5	-0.00595745	-5.1284
a1	pepa1c146	20210219_Jamet_3_1_NP_C7	4360	1084.48	387.891	GGSKSISISVAR	3		0.00032	31.2	-0.000896447	-0.771695
a1	pepa1c146	20210219_Jamet_3_2_NP_C12	4297	1080.12	581.331	GGSKSISISVAR	2		3.2e-10	56.9	-0.00289645	-2.49337
a1	pepa1c146	20210219_Jamet_3_2_NP_C12	4303	1080.95	387.892	GGSKSISISVAR	3		0.002	27.8	0.00203555	1.75228
a1	pepa1c146	20210219_Jamet_3_3_NP_D5	4295	1091.61	387.892	GGSKSISISVAR	3		0.00047	31.2	0.00170255	1.46562
a1	pepa1c146	20210219_Jamet_3_3_NP_D5	4299	1092.44	581.332	GGSKSISISVAR	2		1.3e-09	55.9	-0.00274045	-2.35908
a1	pepa1c147	20210219_Jamet_1_1_NP_A1	2363	750.341	736.968	GGSYGSGGGGGGHGSYGSGSSSGGYR	3		2.5e-13	65.6	-0.0017161	-0.776906
a1	pepa1c147	20210219_Jamet_1_2_NP_A6	2320	737.801	736.969	GGSYGSGGGGGGHGSYGSGSSSGGYR	3		3.7e-12	60.5	-0.000780103	-0.353165
a1	pepa1c147	20210219_Jamet_1_3_NP_A11	2450	757.495	736.968	GGSYGSGGGGGGHGSYGSGSSSGGYR	3		1.8e-12	64.1	-0.0024511	-1.10965
a1	pepa1c147	20210219_Jamet_2_1_NP_B4	2405	758.058	736.97	GGSYGSGGGGGGHGSYGSGSSSGGYR	3		6.8e-13	53.6	0.0014439	0.653675
a1	pepa1c147	20210219_Jamet_2_2_NP_B9	2381	757.279	736.969	GGSYGSGGGGGGHGSYGSGSSSGGYR	3		5.4e-15	73.6	-0.000497103	-0.225046
a1	pepa1c147	20210219_Jamet_2_3_NP_C2	2449	774.938	736.969	GGSYGSGGGGGGHGSYGSGSSSGGYR	3		5.1e-12	58.8	5.78974e-05	0.026211
a1	pepa1c147	20210219_Jamet_3_1_NP_C7	2407	756.686	736.968	GGSYGSGGGGGGHGSYGSGSSSGGYR	3		3.1e-11	56.1	-0.0023891	-1.08158
a1	pepa1c147	20210219_Jamet_3_2_NP_C12	2422	764.772	736.969	GGSYGSGGGGGGHGSYGSGSSSGGYR	3		5.9e-10	55.3	0.000916897	0.415094
a1	pepa1c147	20210219_Jamet_3_3_NP_D5	2412	767.6	736.968	GGSYGSGGGGGGHGSYGSGSSSGGYR	3		1e-12	49	-0.0044371	-2.00875
a1	pepa1c148	20210219_Jamet_2_1_NP_B4	5682	1273.16	778.362	GGVSCGGLSYSTTPGR	2	5C:57.02	3.5e-12	74.6	-0.000391428	-0.251606
a1	pepa1c148	20210219_Jamet_2_1_NP_B4	5692	1274.44	519.244	GGVSCGGLSYSTTPGR	3	5C:57.02	3.8e-07	41	0.00110957	0.713222
a1	pepa1c149	20210219_Jamet_2_1_NP_B4	6831	1438.76	669.657	GGVVCGDLCASTTAPVVSTR	3	5C:57.02 9C:57.02	4.3e-12	54.5	-0.00647354	-3.22554
a1	pepa1c149	20210219_Jamet_2_1_NP_B4	7929	1604.38	669.66	GGVVCGDLCASTTAPVVSTR	3	5C:57.02 9C:57.02	1e-15	69.4	0.000594464	0.2962
a1	pepa1c149	20210219_Jamet_2_1_NP_B4	7930	1604.53	1003.99	GGVVCGDLCASTTAPVVSTR	2	5C:57.02 9C:57.02	1e-15	84.5	-0.000170536	-0.0849724
a1	pepa1c149	20210219_Jamet_2_1_NP_B4	8291	1658.95	1003.98	GGVVCGDLCASTTAPVVSTR	2	5C:57.02 9C:57.02	1e-15	77.5	-0.00835054	-4.16078
a1	pepa1c150	20210219_Jamet_2_1_NP_B4	7501	1541.81	1011.98	GGVVCGDLCASTTAPVVSTR	2	5C:57.02 9C:57.02 15P:15.99	0.00049	27.8	-0.00458516	-2.26656
a1	pepa1c151	20210219_Jamet_1_3_NP_A11	8075	1623.33	606.776	GLGVGFGSGGGSSSS	2		0.0015	26.3	-0.00526157	-4.33926
a1	pepa1c152	20210219_Jamet_3_1_NP_C7	9247	1810.73	656.31	GLGVGFGSGGGSSSSV	2		0.001	25	-0.00535248	-4.08082
a1	pepa1c153	20210219_Jamet_1_2_NP_A6	7445	1454.29	720.358	GLGVGFGSGGGSSSSVK	2		3.2e-13	61.3	-0.0038195	-2.65296
a1	pepa1c153	20210219_Jamet_1_3_NP_A11	6839	1439.7	720.358	GLGVGFGSGGGSSSSVK	2		7.4e-11	59.4	-0.0045785	-3.18015
a1	pepa1c153	20210219_Jamet_2_2_NP_B9	6882	1438.62	720.359	GLGVGFGSGGGSSSSVK	2		2.7e-10	68.8	-0.000889496	-0.617829
a1	pepa1c153	20210219_Jamet_3_3_NP_D5	6690	1455.15	720.36	GLGVGFGSGGGSSSSVK	2		9.4e-14	73.6	0.000990504	0.687987
a1	pepa1c154	20210219_Jamet_1_3_NP_A11	6145	1337.51	612.801	GLGVGGGFSSSSGR	2		1.4e-09	49.3	-0.00171346	-1.39921
a1	pepa1c154	20210219_Jamet_2_2_NP_B9	6136	1337.72	612.803	GLGVGGGFSSSSGR	2		6.6e-09	49.3	0.00234054	1.91127
a1	pepa1c155	20210219_Jamet_1_3_NP_A11	4199	1053.2	575.305	GLSSVGGGSSTIK	2		0.0083	27.9	-0.00785155	-6.82974
a1	pepa1c155	20210219_Jamet_3_1_NP_C7	4177	1055.28	575.308	GLSSVGGGSSTIK	2		1.5e-05	39.1	-0.00171655	-1.49315
a1	pepa1c156	20210219_Jamet_2_1_NP_B4	5331	1222.84	397.712	GLTGFGSR	2		0.0077	32.3	0.00187086	2.35501
a1	pepa1c157	20210219_Jamet_2_1_NP_B4	5341	1224.14	416.701	GLTGGFGSH	2		0.00057	31.4	0.000869304	1.04434
a1	pepa1c158	20210219_Jamet_2_1_NP_B4	6396	1375.88	618.277	GLTGGFGSHSVCG	2	12C:57.02	9.3e-07	42.3	-0.00105292	-0.852187
a1	pepa1c159	20210219_Jamet_2_1_NP_B4	7113	1483.61	532.585	GLTGGFGSHSVCGGFR	3	12C:57.02	4.2e-08	51.4	0.00221842	1.39022
a1	pepa1c159	20210219_Jamet_2_1_NP_B4	7123	1485.1	798.373	GLTGGFGSHSVCGGFR	2	12C:57.02	1e-15	98.2	0.00120442	0.754773
a1	pepa1c159	20210219_Jamet_2_1_NP_B4	7464	1536.3	532.583	GLTGGFGSHSVCGGFR	3	12C:57.02	8.4e-10	53.1	-0.00535558	-3.35618
a1	pepa1c160	20210219_Jamet_1_1_NP_A1	10654	2036.71	591.278	GMQDLVEDFK	2		0.00066	30.2	-0.00241896	-2.04728
a1	pepa1c160	20210219_Jamet_1_2_NP_A6	11771	2018.53	591.279	GMQDLVEDFK	2		0.00051	32.4	-0.000236963	-0.200553
a1	pepa1c160	20210219_Jamet_1_3_NP_A11	10597	2039.67	591.278	GMQDLVEDFK	2		0.0022	30.3	-0.00227096	-1.92202
a1	pepa1c160	20210219_Jamet_2_1_NP_B4	10614	2037.84	591.277	GMQDLVEDFK	2		0.0016	28.2	-0.00492596	-4.16907
a1	pepa1c160	20210219_Jamet_2_3_NP_C2	10774	2040.42	591.278	GMQDLVEDFK	2		0.00045	28.8	-0.00162196	-1.37274
a1	pepa1c160	20210219_Jamet_3_1_NP_C7	10521	2029.91	591.277	GMQDLVEDFK	2		0.0009	32.8	-0.00444196	-3.75943
a1	pepa1c160	20210219_Jamet_3_2_NP_C12	10562	2030.13	591.279	GMQDLVEDFK	2		0.001	30.3	8.80369e-05	0.0745097
a1	pepa1c161	20210219_Jamet_1_2_NP_A6	8648	1605.23	599.279	GMQDLVEDFK	2	2M:15.99	0.0026	32.2	0.00562642	4.69829
a1	pepa1c161	20210219_Jamet_3_1_NP_C7	7921	1608.42	599.276	GMQDLVEDFK	2	2M:15.99	5.1e-05	36.3	-0.000294583	-0.245989
a1	pepa1c162	20210219_Jamet_3_1_NP_C7	9217	1806.39	712.348	GMQDLVEDFKNK	2		1.1e-07	47.8	-0.000670421	-0.470904
a1	pepa1c162	20210219_Jamet_3_1_NP_C7	9222	1807.05	475.235	GMQDLVEDFKNK	3		8.4e-06	41.7	0.000908579	0.638186
a1	pepa1c163	20210219_Jamet_1_2_NP_A6	6812	1376.95	480.566	GMQDLVEDFKNK	3	2M:15.99	8.2e-05	34.6	0.00138796	0.964072
a1	pepa1c163	20210219_Jamet_3_1_NP_C7	6392	1381.95	480.565	GMQDLVEDFKNK	3	2M:15.99	2.7e-05	36.6	-0.00322104	-2.23733
a1	pepa1c163	20210219_Jamet_3_1_NP_C7	6435	1388.68	720.344	GMQDLVEDFKNK	2	2M:15.99	1.1e-06	44.5	-0.00242904	-1.6872
a1	pepa1c164	20210219_Jamet_1_2_NP_A6	12507	2128.36	824.401	GMQDLVEDFKNKYEDEINKR	3		1.3e-13	63.4	0.00182638	0.739069
a1	pepa1c165	20210219_Jamet_1_2_NP_A6	10203	1801.04	829.737	GMQDLVEDFKNKYEDEINKR	3	2M:15.99	5.8e-12	59.1	0.0131888	5.30269
a1	pepa1c166	20210219_Jamet_1_3_NP_A11	4782	1144.98	361.181	GRGGGGGGFRGF	3		6.4e-06	50.4	-0.00161533	-1.49356
a1	pepa1c166	20210219_Jamet_2_2_NP_B9	4629	1135.8	361.181	GRGGGGGGFRGF	3		0.0069	33.2	0.00108967	1.00752
a1	pepa1c166	20210219_Jamet_3_3_NP_D5	4688	1160.7	361.182	GRGGGGGGFRGF	3		1.1e-05	43.6	0.00144467	1.33576
a1	pepa1c167	20210219_Jamet_1_3_NP_A11	6673	1416.11	652.981	GRGGGGGGFRGFSSGSAVVSGGS	3		0.00067	35.1	0.000112863	0.0576738
a1	pepa1c168	20210219_Jamet_1_1_NP_A1	5514	1250.59	528.746	GSFGAGGGFGSR	2		2.3e-05	33.5	-0.00182746	-1.72975
a1	pepa1c168	20210219_Jamet_1_3_NP_A11	5609	1261.85	528.746	GSFGAGGGFGSR	2		4.3e-07	37.5	-0.000845461	-0.800258
a1	pepa1c168	20210219_Jamet_3_3_NP_D5	5470	1275.7	528.748	GSFGAGGGFGSR	2		4.4e-06	41.7	0.00289454	2.73978
a1	pepa1c169	20210219_Jamet_1_1_NP_A1	10462	2003.36	800.34	GSGFGGGSGFGGGSGFSGGGFGGGGFGGGR	3		5.3e-15	70.4	-0.0115073	-4.79668
a1	pepa1c169	20210219_Jamet_1_1_NP_A1	10467	2004.13	1200.01	GSGFGGGSGFGGGSGFSGGGFGGGGFGGGR	2		1e-15	90.5	-0.0131993	-5.50197
a1	pepa1c169	20210219_Jamet_1_2_NP_A6	11616	1995.67	800.344	GSGFGGGSGFGGGSGFSGGGFGGGGFGGGR	3		5.5e-10	61.2	-0.00124332	-0.518264
a1	pepa1c169	20210219_Jamet_1_2_NP_A6	11617	1995.78	1200.01	GSGFGGGSGFGGGSGFSGGGFGGGGFGGGR	2		1e-15	91.7	-0.00329032	-1.37153
a1	pepa1c169	20210219_Jamet_1_3_NP_A11	10429	2010.82	800.344	GSGFGGGSGFGGGSGFSGGGFGGGGFGGGR	3		1.2e-12	73.9	-0.000948324	-0.395297
a1	pepa1c169	20210219_Jamet_1_3_NP_A11	10430	2010.98	1200.01	GSGFGGGSGFGGGSGFSGGGFGGGGFGGGR	2		1e-15	91.8	0.000450676	0.187858
a1	pepa1c169	20210219_Jamet_2_1_NP_B4	10417	2003.82	800.342	GSGFGGGSGFGGGSGFSGGGFGGGGFGGGR	3		2.8e-15	77.9	-0.00561932	-2.34234
a1	pepa1c169	20210219_Jamet_2_1_NP_B4	10424	2004.94	1200.01	GSGFGGGSGFGGGSGFSGGGFGGGGFGGGR	2		1e-15	90.5	-0.0102633	-4.27813
a1	pepa1c169	20210219_Jamet_2_2_NP_B9	10748	2000.32	800.343	GSGFGGGSGFGGGSGFSGGGFGGGGFGGGR	3		5.5e-11	65.5	-0.00374432	-1.56077
a1	pepa1c169	20210219_Jamet_2_2_NP_B9	10749	2000.43	1200.01	GSGFGGGSGFGGGSGFSGGGFGGGGFGGGR	2		1e-15	91.8	-0.00556132	-2.31817
a1	pepa1c169	20210219_Jamet_2_3_NP_C2	10591	2010.58	800.342	GSGFGGGSGFGGGSGFSGGGFGGGGFGGGR	3		2.7e-12	68.4	-0.00617432	-2.57369
a1	pepa1c169	20210219_Jamet_2_3_NP_C2	10593	2010.88	1200.01	GSGFGGGSGFGGGSGFSGGGFGGGGFGGGR	2		1e-15	85.2	-0.00729432	-3.04055
a1	pepa1c169	20210219_Jamet_3_1_NP_C7	10361	2000.97	1200	GSGFGGGSGFGGGSGFSGGGFGGGGFGGGR	2		1e-15	85.3	-0.0157273	-6.55573
a1	pepa1c169	20210219_Jamet_3_1_NP_C7	10366	2001.78	800.341	GSGFGGGSGFGGGSGFSGGGFGGGGFGGGR	3		1e-15	75.5	-0.00988732	-4.1214
a1	pepa1c169	20210219_Jamet_3_2_NP_C12	10390	1999.78	800.342	GSGFGGGSGFGGGSGFSGGGFGGGGFGGGR	3		4.2e-12	73.1	-0.00645832	-2.69207
a1	pepa1c169	20210219_Jamet_3_2_NP_C12	10400	2001.41	1200.01	GSGFGGGSGFGGGSGFSGGGFGGGGFGGGR	2		1e-15	91.7	-0.00829532	-3.4578
a1	pepa1c169	20210219_Jamet_3_3_NP_D5	10104	2014.42	1200.01	GSGFGGGSGFGGGSGFSGGGFGGGGFGGGR	2		1e-15	86.4	-0.0112223	-4.67788
a1	pepa1c169	20210219_Jamet_3_3_NP_D5	10107	2015.07	800.341	GSGFGGGSGFGGGSGFSGGGFGGGGFGGGR	3		1.3e-10	65.6	-0.0114533	-4.77417
a1	pepa1c170	20210219_Jamet_1_1_NP_A1	6780	1431.09	1302.55	GSGGGSGSGGGYSSGGGSRGGSGGGGVSSGGGSR	2		0.0098	22	-0.00447266	-1.71754
a1	pepa1c171	20210219_Jamet_1_1_NP_A1	2374	752.56	803.993	GSGGGSYGSGGGGGGHGSYGSGSSSGGYR	3		1e-15	95.2	-0.00174095	-0.722396
a1	pepa1c171	20210219_Jamet_1_2_NP_A6	2339	742.536	803.994	GSGGGSYGSGGGGGGHGSYGSGSSSGGYR	3		1e-15	86	0.00112705	0.467662
a1	pepa1c171	20210219_Jamet_1_3_NP_A11	2459	759.799	803.994	GSGGGSYGSGGGGGGHGSYGSGSSSGGYR	3		1e-15	83.8	0.00045105	0.18716
a1	pepa1c171	20210219_Jamet_2_1_NP_B4	2430	762.575	803.993	GSGGGSYGSGGGGGGHGSYGSGSSSGGYR	3		1e-15	69.9	-0.00188795	-0.783392
a1	pepa1c171	20210219_Jamet_2_2_NP_B9	2387	758.248	803.994	GSGGGSYGSGGGGGGHGSYGSGSSSGGYR	3		1e-15	95.2	-2.29499e-05	-0.00952292
a1	pepa1c171	20210219_Jamet_2_3_NP_C2	2445	774.048	803.995	GSGGGSYGSGGGGGGHGSYGSGSSSGGYR	3		1.6e-14	65.2	0.00431205	1.78926
a1	pepa1c171	20210219_Jamet_3_1_NP_C7	2412	757.92	803.994	GSGGGSYGSGGGGGGHGSYGSGSSSGGYR	3		1e-15	86.2	-8.89499e-05	-0.0369092
a1	pepa1c171	20210219_Jamet_3_2_NP_C12	2423	764.923	803.994	GSGGGSYGSGGGGGGHGSYGSGSSSGGYR	3		1e-15	84.5	0.00052605	0.218281
a1	pepa1c171	20210219_Jamet_3_3_NP_D5	2417	768.461	803.994	GSGGGSYGSGGGGGGHGSYGSGSSSGGYR	3		3.5e-11	57.8	-0.00076495	-0.317411
a1	pepa1c172	20210219_Jamet_1_3_NP_A11	2279	725.113	1133.13	GSGGGSYGSGGGGGGHGSYGSGSSSGGYRGGSGGGGGGSSGGR	3		0.001	22.9	0.0041426	1.21935
a1	pepa1c173	20210219_Jamet_3_1_NP_C7	5204	1213.62	475.546	GSGGLGGACGGAGFGSR	3	9C:57.02	2.6e-07	45.7	-0.0102402	-7.18792
a1	pepa1c174	20210219_Jamet_1_1_NP_A1	5996	1317.39	684.827	GSGLGVGGGFSSSSGR	2		1.3e-07	40.2	-0.00446659	-3.2635
a1	pepa1c174	20210219_Jamet_1_2_NP_A6	6342	1319.7	684.828	GSGLGVGGGFSSSSGR	2		7e-12	51.1	-0.000893591	-0.652899
a1	pepa1c174	20210219_Jamet_1_3_NP_A11	6089	1328.92	684.828	GSGLGVGGGFSSSSGR	2		2.6e-12	51.2	-0.00217459	-1.58886
a1	pepa1c174	20210219_Jamet_2_2_NP_B9	6085	1330.81	684.828	GSGLGVGGGFSSSSGR	2		1.3e-11	51.2	-0.00102059	-0.745692
a1	pepa1c174	20210219_Jamet_3_1_NP_C7	6013	1327.14	684.828	GSGLGVGGGFSSSSGR	2		1.1e-08	42.6	-0.00198359	-1.4493
a1	pepa1c174	20210219_Jamet_3_2_NP_C12	6001	1330.39	684.828	GSGLGVGGGFSSSSGR	2		7.6e-10	44.4	-0.00105059	-0.767611
a1	pepa1c174	20210219_Jamet_3_3_NP_D5	5943	1345.58	684.828	GSGLGVGGGFSSSSGR	2		3.3e-10	40.2	-0.00244559	-1.78686
a1	pepa1c175	20210219_Jamet_1_1_NP_A1	2367	751.031	717.963	GSYGSGGGGGGHGSYGSGSSSGGYR	3		1e-15	73.1	0.00328362	1.52594
a1	pepa1c175	20210219_Jamet_1_2_NP_A6	2335	741.694	717.959	GSYGSGGGGGGHGSYGSGSSSGGYR	3		4e-13	58.9	-0.0100874	-4.68773
a1	pepa1c175	20210219_Jamet_1_3_NP_A11	2462	760.489	717.96	GSYGSGGGGGGHGSYGSGSSSGGYR	3		9.9e-14	75	-0.00425638	-1.97799
a1	pepa1c175	20210219_Jamet_2_2_NP_B9	2382	757.429	717.961	GSYGSGGGGGGHGSYGSGSSSGGYR	3		2.9e-13	78.2	-0.00357738	-1.66245
[truncated: 27,333 more rows]

## Sheet: compar spectra
Group ID	Subgroup ID	Protein ID	accession	description	Number of proteins	20210219_Jamet_1_1_NP_A1	20210219_Jamet_1_2_NP_A6	20210219_Jamet_1_3_NP_A11	20210219_Jamet_2_1_NP_B4	20210219_Jamet_2_2_NP_B9	20210219_Jamet_2_3_NP_C2	20210219_Jamet_3_1_NP_C7	20210219_Jamet_3_2_NP_C12	20210219_Jamet_3_3_NP_D5
[truncated: 652 more rows]

[truncated: 1 more sheets: compar specific spectra]
